# Supplementary material for: A HIF independent oxygen-sensitive pathway for controlling cholesterol synthesis
Source: Nat Commun. 2023 Aug 9;14:4816. doi: 10.1038/s41467-023-40541-1 (PMC10412576; doi:10.1038/s41467-023-40541-1)
Supplement: Supplementary file 2 — Supplementary Data 1 [file 41467_2023_40541_MOESM2_ESM.xlsx]

## Sheet: Sheet1
Data S1: CRISPR/Cas9 mutagenesis screen in HMGCR-Clover cells
id	num	neg|score	neg|p-value	neg|fdr	neg|rank	neg|goodsgrna	neg|lfc	pos|score	pos|p-value	pos|fdr	pos|rank	pos|goodsgrna	pos|lfc
UBE2G2	9	0.95546	0.98468	0.999997	19931	1	6.3791	9.6383e-16	2.4277e-07	0.001238	1	7	6.3791
AUP1	9	0.95546	0.98468	0.999997	19932	1	5.3075	4.4233e-10	2.4277e-07	0.001238	3	8	5.3075
FAF2	9	0.98493	0.99356	0.999997	20160	1	4.1771	3.8177e-09	2.4277e-07	0.001238	4	7	4.1771
LCE2B	9	0.94567	0.98215	0.999997	19869	1	1.88	1.5369e-06	1.1896e-05	0.043729	5	7	1.88
GTSF1	9	0.82844	0.94601	0.999997	18959	3	0.94434	1.8097e-06	1.2867e-05	0.043729	6	5	0.94434
CXCL6	8	0.52918	0.79008	0.999997	15794	3	-4.1853	4.5542e-06	3.0831e-05	0.073157	7	3	-4.1853
MARCHF6	8	0.99517	0.99521	0.999997	20280	1	2.6908	4.8581e-06	3.2288e-05	0.073157	8	6	2.6908
YEATS4	9	0.94304	0.98152	0.999997	19843	2	-0.01362	6.2714e-06	4.297e-05	0.087624	9	4	-0.01362
CTD-2370N5	4	0.99999	0.99999	0.999997	20390	0	3.1717	6.3021e-06	2.2577e-05	0.065771	10	4	3.1717
AC131935	10	0.077246	0.26832	0.964944	5389	2	0.9988	7.1107e-06	4.9282e-05	0.091359	11	8	0.9988
USP48	9	0.048955	0.1854	0.92081	4030	5	-6.0234	1.7083e-05	0.00011337	0.177837	12	2	-6.0234
RP11-41O4	6	0.3926	0.65286	0.999997	13708	2	1.5843	1.9156e-05	0.00010609	0.177837	13	4	1.5843
NEURL1	8	0.10855	0.31992	0.984525	6648	4	-4.77	2.1817e-05	0.00013328	0.19413	14	1	-4.77
SLC12A2	9	0.20924	0.50043	0.999997	9761	2	2.7144	2.4465e-05	0.00015756	0.196782	15	6	2.7144
CYorf17	10	0.20742	0.50981	0.999997	9707	2	0.41509	2.5393e-05	0.00016775	0.196782	16	3	0.41509
TMEM98	9	0.42333	0.72755	0.999997	14237	2	1.5763	2.6124e-05	0.00016872	0.196782	17	5	1.5763
FOXE3	10	0.68997	0.90049	0.999997	17679	2	2.2331	2.9127e-05	0.000193	0.196782	18	6	2.2331
KCNG4	7	0.24668	0.52412	0.999997	10754	3	-0.39468	3.0254e-05	0.00017649	0.196782	19	3	-0.39468
AP2A1	7	0.7503	0.90056	0.999997	18318	2	3.1493	3.2627e-05	0.00018912	0.196782	20	4	3.1493
SENP1	9	0.52064	0.80304	0.999997	15670	1	1.4172	4.2161e-05	0.00026971	0.246493	21	5	1.4172
LDLR	9	0.40646	0.71267	0.999997	13950	2	2.8151	4.4317e-05	0.00028379	0.246493	22	7	2.8151
MYO19	10	0.33799	0.66659	0.999997	12673	3	2.5108	4.537e-05	0.00028913	0.246493	23	6	2.5108
QRICH1	9	0.94944	0.98309	0.999997	19889	1	2.3431	4.5675e-05	0.00029011	0.246493	24	6	2.3431
CACNA1F	9	0.3641	0.67435	0.999997	13200	2	2.6338	4.7903e-05	0.00030322	0.247327	25	7	2.6338
KLRF1	7	0.99819	0.99815	0.999997	20336	0	1.3902	7.8911e-05	0.0004178	0.327685	26	6	1.3902
NT5DC1	10	0.024096	0.11126	0.856986	2510	7	-6.5785	8.1813e-05	0.00049889	0.35436	27	2	-6.5785
C6orf229	10	0.88215	0.96862	0.999997	19368	3	-5.3306	8.9474e-05	0.0005387	0.35436	28	4	-5.3306
C1orf27	7	0.33089	0.61015	0.999997	12528	3	-5.9911	9.1835e-05	0.00047509	0.35436	29	3	-5.9911
SP6	6	0.97526	0.97707	0.999997	20089	1	2.2374	0.00010802	0.00050957	0.35436	30	5	2.2374
TBC1D14	8	0.57124	0.81862	0.999997	16330	4	-1.2783	0.00011158	0.00060764	0.387222	31	4	-1.2783
TRDJ4	6	0.58662	0.79408	0.999997	16536	1	2.973	0.00011212	0.00052802	0.35436	32	4	2.973
LAMP3	9	0.31475	0.62713	0.999997	12202	5	-5.5042	0.00012272	0.00068436	0.410454	33	2	-5.5042
CLVS2	10	0.64856	0.88414	0.999997	17277	2	1.2359	0.00012438	0.00075962	0.418377	34	7	1.2359
ARCN1	7	0.85727	0.93951	0.999997	19192	1	-5.7616	0.00012996	0.00066008	0.407891	35	2	-5.7616
ZNF708	10	0.33113	0.65909	0.999997	12535	3	-1.0468	0.00013489	0.00081837	0.418377	36	5	-1.0468
CCND3	10	0.86584	0.9645	0.999997	19252	2	0.92587	0.00013843	0.00083779	0.418377	37	7	0.92587
HOXB13	8	0.88746	0.96042	0.999997	19430	1	-0.011252	0.0001449	0.00076738	0.418377	38	3	-0.011252
TAPT1	8	0.19399	0.46397	0.999997	9313	4	-5.4649	0.00015271	0.00080526	0.418377	39	2	-5.4649
DLAT	9	0.99996	0.99997	0.999997	20386	0	1.3256	0.00015651	0.00084119	0.418377	40	6	1.3256
ABHD8	10	0.66013	0.88868	0.999997	17377	3	1.5274	0.00016884	0.00099898	0.452695	41	6	1.5274
KRTAP6-3	9	0.99994	0.99995	0.999997	20384	0	1.1256	0.00017621	0.00092664	0.44566	42	6	1.1256
AC026461	5	0.99952	0.99951	0.999997	20368	0	1.6946	0.00017821	0.00075379	0.418377	43	4	1.6946
EMP2	9	0.62333	0.85752	0.999997	16985	2	2.0745	0.0001786	0.00093975	0.44566	44	5	2.0745
ARMC5	8	0.81527	0.93496	0.999997	18850	2	-1.1576	0.00018704	0.00098733	0.452695	45	4	-1.1576
CCDC108	9	0.65738	0.87525	0.999997	17363	1	-0.95266	0.00019547	0.0010296	0.456414	46	4	-0.95266
C4orf32	8	0.82747	0.94032	0.999997	18944	2	1.9245	0.00020165	0.0010626	0.461028	47	6	1.9245
IGHV3-74	10	0.99727	0.99795	0.999997	20319	1	1.4451	0.00020486	0.0011801	0.47185	48	6	1.4451
HIST1H4G	8	0.41833	0.71134	0.999997	14158	3	2.1304	0.00021902	0.0011558	0.471386	49	5	2.1304
CGREF1	10	0.73326	0.91778	0.999997	18149	4	0.41459	0.00022352	0.0012767	0.484873	50	5	0.41459
ANKRD13C	8	0.9684	0.98672	0.999997	20033	1	1.0501	0.00023107	0.0012175	0.477437	51	6	1.0501
CRIPT	6	0.93609	0.95962	0.999997	19784	1	2.2541	0.00023874	0.0011034	0.46875	52	4	2.2541
UBE2J2	8	0.9827	0.98966	0.999997	20141	1	2.005	0.00024415	0.001284	0.484873	53	5	2.005
NXPH4	8	0.99222	0.99323	0.999997	20242	1	0.8229	0.00025039	0.001316	0.487939	54	6	0.8229
FBRS	8	0.80996	0.93258	0.999997	18802	2	-3.8908	0.00025581	0.0013466	0.490364	55	3	-3.8908
SMYD5	9	0.78233	0.93142	0.999997	18586	3	-1.0107	0.00026618	0.0013879	0.490453	56	4	-1.0107
UBA52	9	0.68032	0.88709	0.999997	17588	2	-5.3427	0.00027712	0.00145	0.490453	57	3	-5.3427
GCC2	9	0.71387	0.90421	0.999997	17935	2	1.7459	0.00027963	0.0014646	0.490453	58	6	1.7459
MUC4	9	0.99068	0.99471	0.999997	20219	1	1.4351	0.00028216	0.0014748	0.490453	59	6	1.4351
CSTF1	9	0.25271	0.56378	0.999997	10910	5	-5.703	0.00028963	0.0015059	0.490453	60	3	-5.703
RUFY3	10	0.29061	0.61304	0.999997	11718	4	-4.512	0.00029995	0.0016472	0.490453	61	3	-4.512
HCFC1R1	9	0.71533	0.90497	0.999997	17947	2	2.0453	0.00031218	0.0016229	0.490453	62	5	2.0453
NAT1	9	0.89491	0.96909	0.999997	19484	2	1.6902	0.00031314	0.0016277	0.490453	63	6	1.6902
MUC22	9	0.96131	0.98633	0.999997	19975	2	1.7872	0.00031614	0.0016481	0.490453	64	5	1.7872
RNASE7	9	0.99989	0.9999	0.999997	20380	0	1.3721	0.00031781	0.0016549	0.490453	65	6	1.3721
ZNF645	9	0.60357	0.84714	0.999997	16757	4	-4.5867	0.00031904	0.0016627	0.490453	66	3	-4.5867
UBE2J1	9	0.95321	0.98408	0.999997	19920	2	2.1115	0.00032321	0.0016836	0.490453	67	5	2.1115
PRKAB2	6	0.0095886	0.04326	0.721289	1365	2	-4.4518	0.00034358	0.0015695	0.490453	68	2	-4.4518
OR3A2	10	0.70753	0.90748	0.999997	17862	1	1.554	0.00034617	0.0018657	0.4956	69	6	1.554
NDUFA12	10	0.50851	0.80091	0.999997	15518	4	1.7254	0.00036049	0.001954	0.4956	70	6	1.7254
PIGN	10	0.65722	0.88757	0.999997	17360	3	1.47	0.00036147	0.0019589	0.4956	71	6	1.47
ANKFY1	9	0.033842	0.13999	0.885184	3136	4	-4.3702	0.00036811	0.0019157	0.4956	72	4	-4.3702
GINS2	9	0.087545	0.28844	0.975252	5834	6	-6.1027	0.00036967	0.0019225	0.4956	73	3	-6.1027
LINGO2	9	0.21367	0.50713	0.999997	9866	4	-5.1251	0.00037135	0.0019327	0.4956	74	4	-5.1251
MEPE	10	0.42898	0.74562	0.999997	14350	2	1.2179	0.00037629	0.0020264	0.49723	75	5	1.2179
CITED2	9	0.85152	0.95381	0.999997	19154	1	1.0289	0.00037821	0.0019686	0.4956	76	6	1.0289
NMS	10	0.966	0.99027	0.999997	20011	2	-1.0995	0.00038047	0.0020482	0.49723	77	5	-1.0995
TTLL7	8	0.35352	0.66	0.999997	12988	3	2.091	0.00038411	0.0019084	0.4956	78	5	2.091
NAT9	7	0.85816	0.93983	0.999997	19194	1	2.5242	0.00038824	0.001752	0.4956	79	4	2.5242
AL603965	3	0.99961	0.99961	0.999997	20370	0	2.6329	0.00039232	0.001149	0.471386	80	3	2.6329
SLC24A5	8	0.827	0.94012	0.999997	18943	3	-5.5207	0.000398	0.0019618	0.4956	81	3	-5.5207
PIK3R6	10	0.74531	0.9226	0.999997	18267	4	-4.0333	0.00039957	0.0021366	0.506259	82	3	-4.0333
SAMD13	7	0.99993	0.99993	0.999997	20383	0	1.8897	0.00040045	0.0018001	0.4956	83	5	1.8897
ZNF676	4	0.64811	0.78262	0.999997	17267	1	-5.2891	0.00040356	0.0015219	0.490453	84	1	-5.2891
TPGS1	8	0.63545	0.86103	0.999997	17123	3	-4.9033	0.00041446	0.0020303	0.49723	85	2	-4.9033
FAM149A	9	0.01572	0.077338	0.788973	1917	5	-6.2311	0.00041718	0.0021599	0.506259	86	2	-6.2311
AL590822	10	0.017196	0.085164	0.805879	2047	3	1.1706	0.00042143	0.0022356	0.512237	87	6	1.1706
ARRDC5	8	0.76986	0.91541	0.999997	18486	2	0.27949	0.00044225	0.0021495	0.506259	88	4	0.27949
IL37	10	0.34015	0.66893	0.999997	12728	3	1.5476	0.00044648	0.0023619	0.523954	89	6	1.5476
TRGV4	9	0.52824	0.80707	0.999997	15779	2	1.6684	0.00045892	0.0023653	0.523954	90	5	1.6684
CIR1	9	0.19432	0.4773	0.999997	9325	4	-5.1797	0.00046498	0.0023896	0.523954	91	3	-5.1797
TMED2	7	0.87293	0.94512	0.999997	19298	2	1.9261	0.00049046	0.0021983	0.509395	92	5	1.9261
SMCP	10	0.88994	0.97065	0.999997	19444	2	1.3677	0.00050223	0.0026207	0.550934	93	6	1.3677
TRAV22	9	0.76259	0.92546	0.999997	18439	3	1.1592	0.00050799	0.0025842	0.548938	94	6	1.1592
COL14A1	7	0.14634	0.37232	0.997807	7949	2	0.86647	0.00051532	0.0023022	0.521617	95	4	0.86647
SUMO3	9	0.87302	0.96121	0.999997	19300	2	0.97093	0.00052986	0.0026896	0.554901	96	6	0.97093
UROC1	9	0.29467	0.60716	0.999997	11810	4	-5.6626	0.00053227	0.0026988	0.554901	97	4	-5.6626
TCTN3	8	0.72914	0.8985	0.999997	18088	2	1.9808	0.00054054	0.0025527	0.548938	98	5	1.9808
CDK1	8	0.13743	0.3793	0.999997	7660	2	-5.4653	0.00054531	0.0025765	0.548938	99	2	-5.4653
KNCN	9	0.014548	0.072396	0.781366	1816	6	-6.2974	0.00056439	0.002846	0.558026	100	1	-6.2974
SLC30A4	8	0.96215	0.98495	0.999997	19981	2	-1.5171	0.00058186	0.0027212	0.554901	101	3	-1.5171
GOLGA6C	8	8.3282e-08	7.283e-07	0.003536	5	3	1.2223	0.00062894	0.0029164	0.566384	102	5	1.2223
SLC8A1	7	0.76908	0.91103	0.999997	18482	1	2.0066	0.00064259	0.002826	0.558026	103	5	2.0066
TMEM220	7	0.4251	0.69943	0.999997	14284	1	1.156	0.00064527	0.0028358	0.558026	104	5	1.156
C1orf52	9	0.88507	0.96553	0.999997	19406	2	0.543	0.00065757	0.0032892	0.609309	105	4	0.543
TRAJ44	6	0.11346	0.30759	0.984201	6854	3	-1.6133	0.00066333	0.0027649	0.558026	106	3	-1.6133
SOWAHD	9	0.9443	0.98181	0.999997	19854	1	-0.25983	0.00066678	0.0033363	0.609309	107	4	-0.25983
FAM133A	9	0.8604	0.95679	0.999997	19214	2	-5.368	0.00071157	0.0035641	0.615305	108	2	-5.368
ZNF444	10	0.65426	0.8864	0.999997	17341	2	1.2336	0.00071167	0.0035626	0.615305	109	5	1.2336
RIN2	9	0.57888	0.83418	0.999997	16434	2	0.83033	0.0007125	0.0035699	0.615305	110	6	0.83033
LCN1	10	0.48241	0.78308	0.999997	15168	4	-1.6686	0.0007195	0.0036019	0.615305	111	5	-1.6686
UQCC2	8	0.81527	0.93496	0.999997	18851	2	1.7364	0.00072479	0.0033101	0.609309	112	5	1.7364
KCMF1	8	0.18528	0.45182	0.999997	9082	4	-5.4187	0.00073406	0.0033465	0.609309	113	2	-5.4187
TCEAL7	8	0.72938	0.8986	0.999997	18092	3	-4.4663	0.00074217	0.0033796	0.609875	114	3	-4.4663
IGKC	10	0.34249	0.6715	0.999997	12769	4	0.98404	0.00075389	0.0037539	0.62058	115	5	0.98404
KMT2C	10	0.32877	0.6565	0.999997	12479	4	-4.6067	0.0007664	0.0038078	0.62058	116	4	-4.6067
AP003062	8	0.54811	0.80302	0.999997	16024	1	1.5719	0.00076849	0.0034922	0.615305	117	5	1.5719
ANKS4B	10	0.20783	0.51037	0.999997	9728	3	1.1791	0.00076879	0.003819	0.62058	118	5	1.1791
DDRGK1	10	0.84974	0.9605	0.999997	19129	2	1.324	0.00078189	0.0038753	0.622242	119	6	1.324
KLHL6	6	0.41757	0.67112	0.999997	14136	3	-4.5942	0.00078406	0.0032004	0.604281	120	2	-4.5942
ITM2B	8	0.13197	0.36844	0.996287	7497	3	-1.843	0.00078664	0.0035684	0.615305	121	4	-1.843
ANAPC7	8	0.53941	0.79709	0.999997	15930	3	0.92351	0.00079977	0.0036209	0.615305	122	5	0.92351
PCDHB4	10	0.9403	0.98513	0.999997	19822	3	-1.9535	0.00080105	0.0039566	0.6241	123	5	-1.9535
ZCCHC7	8	0.44699	0.73218	0.999997	14592	4	-5.4901	0.00080617	0.0036539	0.615784	124	2	-5.4901
TRIQK	5	0.99687	0.99686	0.999997	20316	0	0.078384	0.00083267	0.0031052	0.591792	125	2	0.078384
CYB5D2	9	0.90575	0.97311	0.999997	19557	1	1.6601	0.00083496	0.0040399	0.6241	126	5	1.6601
CD63	8	0.32661	0.62991	0.999997	12445	1	-2.2845	0.00083931	0.0037961	0.62058	127	3	-2.2845
PPP2R5E	10	0.59939	0.85961	0.999997	16713	3	-5.3421	0.00084511	0.004154	0.625461	128	3	-5.3421
SLC38A10	8	0.49282	0.76476	0.999997	15314	4	-5.4457	0.00085057	0.0038345	0.62058	129	2	-5.4457
FP15737	10	0.96896	0.99089	0.999997	20042	1	-0.65326	0.00085184	0.0041875	0.625461	130	3	-0.65326
DPYD	10	0.82256	0.95339	0.999997	18906	3	1.2754	0.00085489	0.004202	0.625461	131	6	1.2754
SIK1	9	0.51764	0.80142	0.999997	15624	4	-4.3526	0.00085893	0.0041341	0.625461	132	4	-4.3526
C5orf46	10	0.81574	0.95065	0.999997	18855	3	0.39491	0.00088535	0.0043433	0.637189	133	5	0.39491
STXBP4	8	0.25486	0.54382	0.999997	10959	2	1.7824	0.00088999	0.0040015	0.6241	134	5	1.7824
MEAF6	8	0.6998	0.88663	0.999997	17787	2	-5.1142	0.00089417	0.0040171	0.6241	135	2	-5.1142
RBMY1B	7	0.44412	0.71658	0.999997	14566	3	-5.0918	0.00090505	0.0039243	0.6241	136	2	-5.0918
IDE	8	0.44881	0.73352	0.999997	14634	3	-4.4903	0.00092055	0.0041399	0.625461	137	3	-4.4903
SYDE2	10	0.58762	0.85223	0.999997	16548	3	-2.7255	0.00092291	0.0045317	0.655396	138	3	-2.7255
SLC4A4	10	0.063452	0.23537	0.952746	4758	6	-5.3772	0.00095411	0.0046876	0.658416	139	1	-5.3772
FBXL8	10	0.31375	0.63969	0.999997	12177	4	-2.1851	0.00096132	0.0047221	0.658416	140	5	-2.1851
PPP1R14A	10	0.78839	0.93979	0.999997	18635	2	1.0333	0.00098038	0.0048109	0.658416	141	6	1.0333
MC4R	10	0.34968	0.67925	0.999997	12916	5	-4.7171	0.00099667	0.0048881	0.663394	142	4	-4.7171
RNMT	8	0.52748	0.78888	0.999997	15772	3	-1.9024	0.0010073	0.0045021	0.655396	143	4	-1.9024
DNAI2	9	0.88503	0.96551	0.999997	19404	2	1.5579	0.0010352	0.0048051	0.658416	144	5	1.5579
GOLGA8B	10	0.59888	0.8593	0.999997	16704	3	-1.5923	0.0010483	0.0051027	0.663394	145	5	-1.5923
IL33	8	0.86954	0.95604	0.999997	19275	1	-1.8106	0.0010686	0.0047624	0.658416	146	4	-1.8106
ANKRD35	8	0.6611	0.87131	0.999997	17392	3	-5.5422	0.0010716	0.0047779	0.658416	147	2	-5.5422
UBE2F-SCLY	3	0.95851	0.95872	0.999997	19954	0	-5.1515	0.0010878	0.0030943	0.591792	148	1	-5.1515
GJB7	9	0.20915	0.50027	0.999997	9750	6	-6.4369	0.001104	0.0050707	0.663394	149	1	-6.4369
RFX7	10	0.77062	0.93277	0.999997	18498	4	-5.5496	0.0011055	0.0053557	0.663394	150	3	-5.5496
ZNF568	9	0.99499	0.99612	0.999997	20276	1	-3.7657	0.0011326	0.0051789	0.663394	151	4	-3.7657
PMM2	9	0.64259	0.86755	0.999997	17205	3	1.4933	0.001139	0.0052066	0.663394	152	5	1.4933
NME4	9	0.86632	0.95886	0.999997	19257	3	-1.5973	0.0011493	0.005243	0.663394	153	4	-1.5973
ZNF32	9	0.43513	0.73778	0.999997	14428	5	-5.9611	0.0011551	0.0052702	0.663394	154	3	-5.9611
LIPK	8	0.76188	0.91203	0.999997	18433	3	-4.7514	0.0011557	0.0051192	0.663394	155	2	-4.7514
KCTD19	10	0.37993	0.70999	0.999997	13496	5	-5.1728	0.0011582	0.005598	0.663394	156	3	-5.1728
POMZP3	10	0.87028	0.96559	0.999997	19279	2	-1.9637	0.0011607	0.0056086	0.663394	157	3	-1.9637
CXCL2	5	0.0088455	0.035454	0.706808	1271	2	2.3772	0.001168	0.0043001	0.635421	158	3	2.3772
RCBTB2	7	0.96819	0.98	0.999997	20031	1	1.5255	0.0011691	0.0050304	0.663394	159	5	1.5255
ORC3	7	0.33094	0.6102	0.999997	12529	3	-0.72892	0.0011962	0.0051406	0.663394	160	3	-0.72892
C21orf119	10	0.81787	0.95152	0.999997	18859	2	-0.88423	0.0011988	0.00578	0.663394	161	4	-0.88423
ZSCAN10	10	0.91994	0.97891	0.999997	19673	2	-4.1599	0.0012015	0.0057907	0.663394	162	3	-4.1599
RNF139	9	0.38359	0.69223	0.999997	13563	3	-2.4108	0.0012244	0.0055436	0.663394	163	4	-2.4108
CDHR3	6	0.051423	0.16624	0.909644	4145	4	-6.0265	0.0012266	0.0046895	0.658416	164	2	-6.0265
RNF5	9	0.93541	0.97976	0.999997	19782	2	1.8006	0.0012282	0.0055557	0.663394	165	5	1.8006
GPT2	10	0.41585	0.73617	0.999997	14122	5	-4.967	0.0012355	0.0059485	0.667032	166	3	-4.967
REV3L	9	0.51213	0.79849	0.999997	15561	4	-4.4975	0.0012412	0.0056077	0.663394	167	3	-4.4975
BMI1	8	0.061733	0.21196	0.94722	4663	4	-5.175	0.0012429	0.0054484	0.663394	168	1	-5.175
TIMM9	8	0.7386	0.90236	0.999997	18199	3	1.5048	0.0012457	0.0054586	0.663394	169	5	1.5048
CRISP2	8	0.016267	0.074797	0.785808	1965	6	-6.5747	0.0012556	0.005497	0.663394	170	2	-6.5747
HEY1	8	0.94504	0.97799	0.999997	19859	1	1.3661	0.0012712	0.0055659	0.663394	171	5	1.3661
SYF2	9	0.59595	0.84312	0.999997	16659	3	0.13851	0.0012766	0.0057475	0.663394	172	4	0.13851
LILRB4	9	0.52768	0.80679	0.999997	15774	3	0.36928	0.001284	0.0057795	0.663394	173	4	0.36928
IVNS1ABP	9	0.19727	0.48192	0.999997	9424	3	-4.2214	0.0012861	0.0057863	0.663394	174	3	-4.2214
RALB	10	0.29996	0.62402	0.999997	11924	5	-5.783	0.0012889	0.0061952	0.667665	175	2	-5.783
ZNF652	10	0.45537	0.76432	0.999997	14734	5	-2.2172	0.0012938	0.0062102	0.667665	176	5	-2.2172
NMRK1	9	0.55965	0.82391	0.999997	16182	4	1.6302	0.0013088	0.0058684	0.665539	177	5	1.6302
MTF2	9	0.29738	0.60988	0.999997	11860	3	0.33837	0.0013103	0.0058747	0.665539	178	4	0.33837
EIF4A2	8	0.91159	0.96694	0.999997	19615	1	1.3609	0.001317	0.0057426	0.663394	179	5	1.3609
ICAM3	8	0.17783	0.4413	0.999997	8890	3	1.2476	0.0013199	0.0057553	0.663394	180	5	1.2476
PRKACG	8	0.24632	0.53294	0.999997	10747	3	1.0958	0.0013213	0.0057611	0.663394	181	5	1.0958
N4BP2L2	9	0.64379	0.86818	0.999997	17222	4	-6.0705	0.0013365	0.0059772	0.667032	182	3	-6.0705
DNAJC22	9	0.015107	0.074784	0.785808	1871	6	-7.2285	0.0013491	0.0060252	0.667032	183	2	-7.2285
UBXN7	9	0.82844	0.94601	0.999997	18958	2	-4.7086	0.0013556	0.0060514	0.667032	184	3	-4.7086
CDHR1	9	0.67741	0.8856	0.999997	17552	3	-6.2585	0.0013725	0.0061209	0.667665	185	3	-6.2585
SNW1	8	0.18123	0.44611	0.999997	8979	4	-5.4616	0.0013793	0.0059898	0.667032	186	3	-5.4616
ZMYM6NB	10	0.97016	0.99113	0.999997	20050	2	-0.58821	0.00139	0.006652	0.673195	187	3	-0.58821
TEX15	9	0.90077	0.97127	0.999997	19528	1	-1.5121	0.0014004	0.0062209	0.667665	188	3	-1.5121
M6PR	10	0.65305	0.88589	0.999997	17332	4	-4.0203	0.0014142	0.0067608	0.673195	189	3	-4.0203
ABHD17A	10	0.99999	0.99998	0.999997	20387	0	0.75336	0.0014156	0.0067681	0.673195	190	6	0.75336
ASPM	8	0.1754	0.43789	0.999997	8830	5	-5.597	0.0014173	0.006135	0.667665	191	2	-5.597
TCP11L2	9	0.018371	0.088386	0.813076	2122	7	-6.4488	0.0014472	0.0064103	0.673195	192	1	-6.4488
SNX30	9	0.28642	0.59893	0.999997	11649	3	-4.531	0.001458	0.0064476	0.673195	193	2	-4.531
AC007375	9	0.1327	0.37436	0.999997	7516	2	1.2868	0.0014639	0.0064748	0.673195	194	5	1.2868
LPIN3	9	0.42818	0.73175	0.999997	14323	2	1.3956	0.0014801	0.0065367	0.673195	195	5	1.3956
DCAF13	9	0.32008	0.63239	0.999997	12313	5	-6.2854	0.0014962	0.0065957	0.673195	196	2	-6.2854
ZNF764	7	0.14291	0.36632	0.995301	7835	3	0.76081	0.0015069	0.0062903	0.671583	197	4	0.76081
HOXB4	8	0.70796	0.88996	0.999997	17876	3	-3.4251	0.0015207	0.0065719	0.673195	198	3	-3.4251
PASD1	8	0.85882	0.95359	0.999997	19198	2	1.1943	0.0015212	0.0065744	0.673195	199	5	1.1943
CXCR6	8	0.067014	0.22497	0.95059	4926	4	-1.8014	0.0015353	0.0066292	0.673195	200	4	-1.8014
GJD2	10	0.5237	0.81108	0.999997	15728	3	-4.9122	0.0015444	0.0073575	0.707851	201	3	-4.9122
PTMA	9	0.09245	0.29921	0.982204	6015	4	-5.4653	0.0015453	0.0067734	0.673195	202	2	-5.4653
WSB1	9	0.537	0.81175	0.999997	15899	3	-2.9698	0.0015535	0.0068006	0.673195	203	4	-2.9698
THUMPD2	8	0.27616	0.57021	0.999997	11412	4	-3.1679	0.0015711	0.0067783	0.673195	204	3	-3.1679
GABRA2	9	0.48977	0.78363	0.999997	15266	3	0.73801	0.0015924	0.0069419	0.683862	205	5	0.73801
HHLA3	9	0.93706	0.98013	0.999997	19796	2	1.3684	0.0016498	0.0071555	0.697713	206	5	1.3684
USP16	8	0.92813	0.9721	0.999997	19726	2	1.1278	0.0016512	0.0070919	0.695283	207	4	1.1278
LAPTM4B	7	0.44722	0.71931	0.999997	14597	2	-4.1567	0.0016597	0.0067671	0.673195	208	2	-4.1567
ATP1A4	8	0.20579	0.48002	0.999997	9659	2	1.3248	0.0016737	0.0071852	0.697713	209	4	1.3248
FLRT2	9	0.48545	0.7802	0.999997	15207	4	-4.929	0.0017024	0.007359	0.707851	210	2	-4.929
LRRC39	9	0.39583	0.70328	0.999997	13760	3	-4.9975	0.0017413	0.0075163	0.71221	211	3	-4.9975
FAM219A	8	0.51654	0.78138	0.999997	15615	4	-3.7309	0.0017438	0.0074702	0.71221	212	3	-3.7309
SMIM12	9	0.39846	0.70564	0.999997	13819	3	-5.3169	0.0017523	0.0075663	0.71221	213	3	-5.3169
PIAS2	8	0.92933	0.97249	0.999997	19736	2	1.3283	0.0017705	0.0075789	0.71221	214	5	1.3283
KRT73	9	0.47342	0.77029	0.999997	15019	5	-5.096	0.001771	0.0076294	0.712579	215	3	-5.096
ENTPD8	9	0.075207	0.25714	0.963207	5306	5	-5.6206	0.0017817	0.0076603	0.712579	216	3	-5.6206
METTL2A	8	0.78331	0.92105	0.999997	18590	2	-0.6511	0.0017975	0.0076877	0.712579	217	4	-0.6511
SLC4A11	8	0.80752	0.93152	0.999997	18786	1	-4.6418	0.0018198	0.0077892	0.715207	218	2	-4.6418
RHOXF1	10	0.15896	0.43765	0.999997	8346	4	-4.9213	0.0018257	0.0084675	0.715207	219	2	-4.9213
SHROOM1	8	0.92128	0.96988	0.999997	19682	2	-3.7112	0.001853	0.0079207	0.715207	220	2	-3.7112
CYP3A7	9	0.85003	0.9533	0.999997	19135	3	-5.1301	0.0018572	0.0079683	0.715207	221	2	-5.1301
THBS2	8	0.06977	0.23171	0.952746	5051	2	-0.42882	0.0018727	0.0080011	0.715207	222	4	-0.42882
PCTP	10	0.54404	0.82451	0.999997	15983	4	-0.40349	0.0018779	0.0086393	0.715207	223	4	-0.40349
ZC2HC1C	10	0.98238	0.99413	0.999997	20137	1	0.0020085	0.0018802	0.0086447	0.715207	224	5	0.0020085
TRBV23OR9-2	9	0.090715	0.29584	0.980931	5956	2	0.092344	0.0018948	0.0081213	0.715207	225	4	0.092344
KCNK12	9	0.49452	0.78747	0.999997	15335	2	1.2141	0.0018978	0.0081315	0.715207	226	5	1.2141
PPARGC1A	9	0.36236	0.67267	0.999997	13170	2	0.48621	0.0019176	0.0082174	0.715207	227	4	0.48621
CLPP	9	0.14213	0.39102	0.999997	7815	3	0.32033	0.0019197	0.0082257	0.715207	228	4	0.32033
AC112715	4	0.73201	0.82757	0.999997	18123	1	1.617	0.0019206	0.0056776	0.663394	229	3	1.617
KIAA1324	9	0.0089719	0.047513	0.729312	1286	5	-5.6305	0.0019287	0.0082587	0.715207	230	2	-5.6305
OR8B2	9	0.95429	0.98438	0.999997	19924	2	-0.55592	0.001939	0.0082985	0.715207	231	4	-0.55592
ZNF775	8	0.19048	0.45913	0.999997	9206	5	-5.617	0.0019482	0.0082999	0.715207	232	3	-5.617
GAGE12C	10	0.87889	0.96777	0.999997	19343	3	-1.9366	0.0019589	0.0089384	0.723303	233	2	-1.9366
NKRF	9	0.44437	0.74566	0.999997	14569	3	-4.7571	0.001964	0.008398	0.715207	234	3	-4.7571
CDC20	7	0.35965	0.63813	0.999997	13112	1	-5.9747	0.0019686	0.0077416	0.714327	235	2	-5.9747
TMEM74	9	0.98851	0.99423	0.999997	20192	1	-4.3559	0.001979	0.008448	0.715207	236	2	-4.3559
PLP2	10	0.021646	0.10214	0.847126	2349	5	-3.8809	0.0019891	0.0090355	0.728271	237	2	-3.8809
LCN12	9	0.36856	0.6785	0.999997	13295	3	-4.2214	0.0019903	0.0084898	0.715207	238	3	-4.2214
TKTL2	8	0.45804	0.74021	0.999997	14772	1	0.5446	0.0019965	0.0084767	0.715207	239	4	0.5446
SEC23B	8	0.43444	0.72305	0.999997	14409	3	-4.9681	0.0020002	0.0084946	0.715207	240	2	-4.9681
FAM83F	9	0.022971	0.10476	0.850002	2432	6	-6.1831	0.0020354	0.0086461	0.715207	241	1	-6.1831
RP11-17M16	8	0.69088	0.88305	0.999997	17687	2	1.0133	0.0020399	0.0086563	0.715207	242	5	1.0133
FRMD6	8	0.59837	0.83664	0.999997	16695	3	-2.1011	0.0020453	0.0086738	0.715207	243	4	-2.1011
RPE65	9	0.98812	0.99416	0.999997	20187	1	1.2839	0.0020503	0.0086981	0.715207	244	5	1.2839
RP11-293I14	7	0.30938	0.58864	0.999997	12101	2	-4.0101	0.0020817	0.00808	0.715207	245	2	-4.0101
HSPA1A	5	0.99903	0.99904	0.999997	20355	0	2.6707	0.0020819	0.007511	0.71221	246	3	2.6707
TRAV19	8	0.31358	0.61489	0.999997	12176	4	-2.6121	0.0020884	0.0088583	0.719676	247	3	-2.6121
FXR1	10	0.20327	0.50429	0.999997	9599	5	-5.3005	0.0020943	0.0094283	0.733642	248	4	-5.3005
RP11-171N4	9	0.87382	0.96147	0.999997	19305	2	0.61749	0.0021514	0.009086	0.729237	249	4	0.61749
SOCS2	9	0.47123	0.76846	0.999997	14982	5	-5.2156	0.0021603	0.009119	0.729237	250	4	-5.2156
ZDHHC20	9	0.90825	0.97404	0.999997	19582	2	-3.2684	0.0021984	0.0092637	0.733642	251	3	-3.2684
SOCS4	10	0.97712	0.99271	0.999997	20099	2	-2.9898	0.0022068	0.0098308	0.733642	252	4	-2.9898
ADAM10	9	0.65738	0.87525	0.999997	17364	2	-4.7499	0.0022189	0.0093404	0.733642	253	3	-4.7499
CDC14A	8	0.525	0.7872	0.999997	15744	2	1.0424	0.00225	0.0094545	0.733642	254	5	1.0424
OR10G4	10	0.10352	0.32712	0.984525	6442	3	0.34017	0.0022557	0.01002	0.733642	255	5	0.34017
ZNF484	9	0.94429	0.9818	0.999997	19851	2	-5.2906	0.0022558	0.0094759	0.733642	256	2	-5.2906
ZNF688	9	0.24034	0.5462	0.999997	10592	4	-5.9243	0.0022558	0.0094759	0.733642	257	2	-5.9243
MSN	7	0.56803	0.80136	0.999997	16293	2	1.8803	0.0022617	0.0086554	0.715207	258	4	1.8803
ZFP90	9	0.35218	0.663	0.999997	12966	3	0.86748	0.0022922	0.0096177	0.733642	259	4	0.86748
ABI3BP	7	0.6208	0.82959	0.999997	16955	1	-0.17752	0.0023014	0.0087782	0.717644	260	3	-0.17752
RTF1	7	0.45631	0.72735	0.999997	14751	4	-5.5394	0.0023076	0.0087981	0.717644	261	1	-5.5394
A1CF	8	0.30738	0.60758	0.999997	12057	4	-5.6295	0.002329	0.0097789	0.733642	262	3	-5.6295
KANSL1L	6	0.57901	0.78855	0.999997	16436	3	-5.9537	0.0023427	0.0083883	0.715207	263	2	-5.9537
IL18R1	9	0.14994	0.4046	0.999997	8049	2	-0.18315	0.002348	0.0098177	0.733642	264	3	-0.18315
CDK6	9	0.036054	0.14686	0.888638	3286	4	0.10692	0.0023667	0.0098847	0.733642	265	4	0.10692
GPHA2	9	0.49443	0.7874	0.999997	15330	3	1.1909	0.0023769	0.0099197	0.733642	266	5	1.1909
SHISA7	9	0.11181	0.33628	0.984943	6784	4	-4.6093	0.0023866	0.0099595	0.733642	267	4	-4.6093
LRRC59	8	0.94197	0.97683	0.999997	19832	2	0.98497	0.0023868	0.0099877	0.733642	268	5	0.98497
EMCN	8	0.95775	0.98306	0.999997	19949	1	1.2124	0.002396	0.010023	0.733642	269	5	1.2124
TMEM247	8	0.45313	0.73669	0.999997	14697	4	-1.9781	0.0024017	0.010044	0.733642	270	4	-1.9781
ANKRD18A	8	0.91318	0.9674	0.999997	19623	2	0.91196	0.0024022	0.010044	0.733642	271	5	0.91196
SOX17	9	0.47979	0.77554	0.999997	15124	3	-3.6652	0.0024036	0.010018	0.733642	272	4	-3.6652
TRAJ34	2	0.99759	0.99755	0.999997	20324	0	2.5469	0.0024095	0.0047109	0.658416	273	2	2.5469
PIK3R4	10	0.75365	0.92597	0.999997	18349	3	-5.6249	0.0024245	0.010632	0.738604	274	3	-5.6249
ERC2	9	0.035659	0.14565	0.888638	3261	6	-5.8543	0.0024273	0.010102	0.733642	275	1	-5.8543
FRZB	9	0.70211	0.89824	0.999997	17811	4	-4.8965	0.0024397	0.010148	0.733814	276	3	-4.8965
LPCAT2	9	0.27989	0.59232	0.999997	11497	4	-4.6863	0.0024657	0.010243	0.73548	277	3	-4.6863
LCE5A	10	0.64546	0.88291	0.999997	17243	4	-2.3907	0.0024835	0.01086	0.738604	278	5	-2.3907
PNOC	10	0.93941	0.98486	0.999997	19816	1	-0.25973	0.0024952	0.010896	0.738604	279	5	-0.25973
ABCA10	8	0.66518	0.87292	0.999997	17432	2	-0.56066	0.0025038	0.010456	0.738604	280	3	-0.56066
THEM5	10	0.80326	0.94571	0.999997	18746	4	0.8854	0.0025064	0.010939	0.738604	281	5	0.8854
SYTL4	8	0.8602	0.95392	0.999997	19211	2	-1.5442	0.0025322	0.010577	0.738604	282	4	-1.5442
ARHGEF18	8	0.027822	0.11744	0.864592	2746	3	-1.4213	0.0025353	0.010585	0.738604	283	4	-1.4213
FRRS1	8	0.95584	0.98224	0.999997	19934	2	-4.3376	0.0025737	0.010731	0.738604	284	3	-4.3376
SCG5	7	0.36952	0.64753	0.999997	13307	3	-5.642	0.0025743	0.0096434	0.733642	285	1	-5.642
PTTG2	10	0.38005	0.71008	0.999997	13508	2	-1.7153	0.0026071	0.011298	0.752912	286	5	-1.7153
OCEL1	8	0.62741	0.85585	0.999997	17031	2	0.90101	0.0026086	0.010864	0.738604	287	5	0.90101
HIF1A	9	0.78	0.93072	0.999997	18574	3	1.2464	0.0026112	0.010765	0.738604	288	5	1.2464
CREG1	10	0.8369	0.9575	0.999997	19027	3	-4.7344	0.0026208	0.011341	0.75333	289	3	-4.7344
PCP4	7	0.25518	0.5331	0.999997	10962	4	-6.0849	0.0026236	0.0097949	0.733642	290	3	-6.0849
RPS6KA3	8	0.058033	0.20276	0.937659	4479	3	0.62333	0.0026344	0.01094	0.738604	291	4	0.62333
RAB40AL	10	0.89454	0.97188	0.999997	19474	3	-1.7232	0.0026422	0.011421	0.753965	292	2	-1.7232
LCE2D	8	0.0091371	0.045877	0.728814	1306	3	-4.7025	0.002644	0.010975	0.738604	293	3	-4.7025
TREX2	9	0.28003	0.59248	0.999997	11508	4	-5.368	0.00265	0.010907	0.738604	294	3	-5.368
CAPZA1	9	0.42476	0.72879	0.999997	14281	4	1.228	0.0026858	0.011042	0.740702	295	5	1.228
MIF	7	0.0017698	0.0099182	0.544994	411	6	-6.1831	0.0027267	0.01011	0.733642	296	1	-6.1831
CHEK2	10	0.27852	0.59889	0.999997	11465	5	-5.6681	0.002751	0.011822	0.761377	297	2	-5.6681
SRRM2	8	0.99672	0.99672	0.999997	20311	0	1.2533	0.0027729	0.011476	0.754919	298	5	1.2533
GPR158	9	0.086295	0.28532	0.972123	5786	4	-0.65934	0.0027875	0.011425	0.753965	299	3	-0.65934
RP11-644F5	10	0.0098016	0.054809	0.755984	1374	5	-5.5251	0.0027884	0.011959	0.761377	300	2	-5.5251
H1FNT	7	0.47578	0.7444	0.999997	15057	3	1.6286	0.0028128	0.010365	0.738604	301	4	1.6286
ZBED3	9	0.21354	0.50691	0.999997	9852	6	-5.7579	0.0028191	0.011542	0.756821	302	3	-5.7579
UBE3A	6	0.60542	0.80751	0.999997	16777	3	-5.4497	0.0028228	0.0099644	0.733642	303	2	-5.4497
ABHD5	8	0.95723	0.98286	0.999997	19943	2	1.2961	0.0028274	0.011685	0.761377	304	5	1.2961
DAG1	10	0.19518	0.49336	0.999997	9364	5	-5.7566	0.0028374	0.012141	0.761377	305	3	-5.7566
IGLV6-57	10	0.33877	0.66743	0.999997	12691	4	-5.4055	0.0028599	0.012227	0.761377	306	1	-5.4055
OR10A2	9	0.1327	0.37436	0.999997	7515	4	-5.7207	0.0028681	0.011731	0.761377	307	1	-5.7207
TMPRSS11BNL	3	0.20827	0.35701	0.992109	9729	1	-4.7382	0.002869	0.0079727	0.715207	308	1	-4.7382
ZNF703	10	0.79068	0.94069	0.999997	18645	4	-4.5351	0.0028694	0.012259	0.761377	309	3	-4.5351
PIRT	10	0.95301	0.98791	0.999997	19914	2	0.55181	0.002887	0.012319	0.761377	310	5	0.55181
TM9SF3	10	0.045224	0.18359	0.919146	3827	4	-1.5985	0.0029143	0.012431	0.761377	311	4	-1.5985
FAM106A	9	0.12561	0.36165	0.993765	7292	5	-5.9734	0.002917	0.011918	0.761377	312	1	-5.9734
PPP1R3D	10	0.49735	0.79332	0.999997	15372	4	-5.8057	0.0029364	0.012501	0.761377	313	3	-5.8057
CA2	9	0.27685	0.58922	0.999997	11430	2	-1.2864	0.0029445	0.012022	0.761377	314	4	-1.2864
FAM46A	6	0.1055	0.29286	0.977719	6523	4	-6.0977	0.0029581	0.010396	0.738604	315	1	-6.0977
NCAN	7	0.87404	0.94553	0.999997	19306	2	1.5551	0.0029605	0.01083	0.738604	316	4	1.5551
APPL2	9	0.20755	0.49783	0.999997	9719	4	-1.8714	0.0029617	0.012087	0.761377	317	4	-1.8714
POLR2D	7	0.93691	0.97288	0.999997	19794	2	-5.4653	0.0029933	0.010917	0.738604	318	1	-5.4653
SLC30A3	10	0.39866	0.72368	0.999997	13828	4	-4.7933	0.0029994	0.012743	0.761377	319	2	-4.7933
ATP6V0B	9	0.48531	0.7801	0.999997	15200	5	-6.2854	0.0030103	0.012265	0.761377	320	2	-6.2854
SPRR3	10	0.72819	0.91577	0.999997	18080	3	-4.9209	0.0030231	0.012829	0.762708	321	3	-4.9209
C17orf97	8	0.14156	0.38741	0.999997	7793	5	-5.4716	0.0030286	0.012444	0.761377	322	2	-5.4716
GFOD2	8	0.14218	0.38861	0.999997	7825	5	-5.6989	0.0030297	0.012449	0.761377	323	3	-5.6989
TOM1L2	9	0.3846	0.69316	0.999997	13585	4	-5.7938	0.0030309	0.012339	0.761377	324	2	-5.7938
ZFYVE27	9	0.29198	0.60456	0.999997	11748	4	-5.2067	0.0030367	0.012366	0.761377	325	3	-5.2067
NMRK2	8	0.64346	0.86445	0.999997	17220	1	-0.68233	0.00304	0.012497	0.761377	326	2	-0.68233
PLXNA3	9	0.099987	0.31384	0.984201	6317	4	-4.8965	0.0030611	0.012459	0.761377	327	3	-4.8965
PRCD	9	0.98928	0.99439	0.999997	20209	1	1.4533	0.0030694	0.012483	0.761377	328	5	1.4533
TMBIM6	10	0.050573	0.20064	0.937659	4101	3	-3.6077	0.0030775	0.013034	0.763185	329	3	-3.6077
ZNF658	10	0.69475	0.90244	0.999997	17729	4	-5.843	0.0030842	0.013062	0.763185	330	2	-5.843
MMP9	9	0.27541	0.58775	0.999997	11398	3	-1.013	0.0030861	0.012541	0.761377	331	4	-1.013
CCDC82	8	0.85882	0.95359	0.999997	19197	2	-4.6695	0.0030889	0.012685	0.761377	332	3	-4.6695
GPR32	9	0.89457	0.96895	0.999997	19476	2	-0.93099	0.0031008	0.012589	0.761377	333	4	-0.93099
XXcos-LUCA11	8	0.56375	0.81362	0.999997	16231	1	0.70893	0.0031022	0.012745	0.761377	334	5	0.70893
CRP	10	0.13824	0.39805	0.999997	7681	3	-4.9164	0.0031093	0.013155	0.76428	335	3	-4.9164
BTN3A3	10	0.76558	0.93069	0.999997	18457	4	-4.9564	0.0031271	0.013226	0.765027	336	3	-4.9564
PRKCD	9	0.83107	0.94688	0.999997	18981	2	0.92954	0.0031451	0.012741	0.761377	337	5	0.92954
PIP	9	0.63897	0.86568	0.999997	17156	3	0.25696	0.0031806	0.012878	0.763185	338	4	0.25696
SCRN3	10	0.60253	0.86158	0.999997	16750	3	-0.32302	0.0031977	0.013482	0.76749	339	4	-0.32302
EIF2B1	9	0.4098	0.71564	0.999997	14029	5	-5.6206	0.0032108	0.012993	0.763185	340	1	-5.6206
RLF	10	0.83488	0.95702	0.999997	19010	2	-1.7123	0.0032354	0.013614	0.76749	341	4	-1.7123
RGPD2	9	0.1432	0.39293	0.999997	7858	3	-0.16478	0.0033	0.01334	0.765922	342	4	-0.16478
CASC5	10	0.22397	0.53145	0.999997	10149	3	-0.94741	0.0033147	0.013902	0.768561	343	4	-0.94741
TMPRSS12	8	0.49266	0.76465	0.999997	15312	4	-6.1207	0.0033332	0.013523	0.76749	344	2	-6.1207
SERPINA10	9	0.13061	0.37061	0.997289	7446	5	-5.9501	0.0033576	0.013529	0.76749	345	2	-5.9501
ARHGAP27	8	0.11887	0.34165	0.984943	7060	4	-5.8504	0.0033767	0.013662	0.76749	346	2	-5.8504
KIF3B	10	0.65285	0.88583	0.999997	17330	3	0.82777	0.0033938	0.014187	0.777706	347	5	0.82777
LCA10	10	0.58002	0.84751	0.999997	16444	4	-4.9731	0.0034038	0.014225	0.777706	348	2	-4.9731
PCDHGA10	4	0.42412	0.61374	0.999997	14271	2	-4.9719	0.0034101	0.0095876	0.733642	349	1	-4.9719
CWF19L1	8	0.60654	0.84204	0.999997	16791	3	-4.836	0.0034357	0.013824	0.768561	350	3	-4.836
TRAPPC9	9	0.70481	0.89961	0.999997	17840	2	-0.084682	0.0034515	0.013882	0.768561	351	3	-0.084682
THSD4	9	0.1242	0.35911	0.99289	7242	3	-0.7821	0.0034529	0.013888	0.768561	352	3	-0.7821
SMAD4	8	0.80483	0.93035	0.999997	18756	2	0.43301	0.0034554	0.01388	0.768561	353	4	0.43301
CAPN8	10	0.88917	0.97044	0.999997	19440	2	-5.1925	0.0034581	0.01442	0.779959	354	3	-5.1925
ZMYM5	8	0.60104	0.83838	0.999997	16724	4	-5.0576	0.0034649	0.013907	0.768561	355	2	-5.0576
LNP1	7	0.48106	0.74898	0.999997	15141	2	1.5788	0.003491	0.012422	0.761377	356	4	1.5788
DNAJB1	7	0.45811	0.72888	0.999997	14775	3	-1.8362	0.0035024	0.012456	0.761377	357	3	-1.8362
NECAB2	10	0.012852	0.06792	0.775265	1658	5	-5.5555	0.0035089	0.014622	0.780895	358	3	-5.5555
KLHDC4	10	0.21761	0.52324	0.999997	9954	5	-5.2847	0.0035125	0.014628	0.780895	359	3	-5.2847
HSPH1	9	0.99898	0.99897	0.999997	20351	0	-0.30181	0.0035281	0.014192	0.777706	360	3	-0.30181
STAU2	9	0.53401	0.81013	0.999997	15856	3	-4.7015	0.0035534	0.014297	0.779544	361	2	-4.7015
DERL1	9	0.42718	0.73091	0.999997	14307	3	-4.2214	0.0035817	0.014404	0.779959	362	3	-4.2214
FPGT	4	0.17679	0.35208	0.990008	8859	1	2.279	0.0035999	0.010068	0.733642	363	3	2.279
UBQLNL	7	0.24475	0.52208	0.999997	10714	4	-6.1891	0.0036025	0.012763	0.761377	364	1	-6.1891
HEYL	9	0.22525	0.52433	0.999997	10172	5	-5.0845	0.0036252	0.014568	0.780895	365	2	-5.0845
RETN	8	0.99785	0.99788	0.999997	20330	0	-3.5802	0.0036329	0.014402	0.779959	366	3	-3.5802
OR2G3	9	0.34841	0.65947	0.999997	12904	5	-6.2173	0.0036403	0.014624	0.780895	367	2	-6.2173
RPP25L	8	0.10237	0.30645	0.984201	6399	4	-5.3485	0.0036595	0.014482	0.780895	368	3	-5.3485
RP11-446E24	6	0.065844	0.2021	0.937659	4861	1	1.1134	0.0036933	0.012769	0.761377	369	4	1.1134
KLF17	9	0.88698	0.96624	0.999997	19418	2	-4.4725	0.0037001	0.014843	0.782808	370	1	-4.4725
AC009977	3	0.99377	0.9939	0.999997	20259	0	3.3429	0.0037137	0.010221	0.73548	371	2	3.3429
KRT82	7	0.30938	0.58864	0.999997	12102	3	-3.8238	0.0037274	0.013118	0.76428	372	3	-3.8238
OR52A5	10	0.12406	0.36999	0.997185	7236	6	-5.5749	0.0037385	0.015412	0.782808	373	3	-5.5749
C5orf17	8	0.32701	0.63036	0.999997	12451	3	-1.0019	0.0037435	0.014717	0.782808	374	4	-1.0019
CAPSL	10	0.15186	0.42436	0.999997	8114	6	-5.8024	0.0037566	0.015477	0.782808	375	2	-5.8024
IGHV3OR16-8	7	0.59441	0.81546	0.999997	16639	2	1.6934	0.0037622	0.013243	0.765027	376	4	1.6934
ZNF709	6	0.51483	0.74245	0.999997	15591	2	1.1237	0.0037663	0.013005	0.763185	377	4	1.1237
TRAV8-3	8	0.0044501	0.025484	0.665158	771	4	-5.3719	0.0037682	0.014799	0.782808	378	1	-5.3719
GPR162	7	0.42384	0.69826	0.999997	14265	2	0.47404	0.0037967	0.013342	0.765922	379	3	0.47404
CCNJL	9	0.96083	0.98618	0.999997	19972	2	-0.40481	0.0037997	0.015202	0.782808	380	3	-0.40481
AQP7	7	0.9985	0.99847	0.999997	20341	0	1.4271	0.0038056	0.013371	0.765922	381	4	1.4271
RNF213	9	0.62047	0.85601	0.999997	16948	4	-0.90403	0.0038365	0.015343	0.782808	382	4	-0.90403
FOXI2	10	0.80318	0.94568	0.999997	18744	2	-3.1696	0.0038387	0.015762	0.782808	383	2	-3.1696
MANBAL	8	0.10576	0.31382	0.984201	6534	6	-6.9792	0.0038442	0.015007	0.782808	384	2	-6.9792
DEFB131	4	0.39737	0.59437	0.999997	13804	2	-6.163	0.0038452	0.010713	0.738604	385	1	-6.163
TCEA3	9	0.5784	0.83392	0.999997	16429	4	-5.683	0.0038693	0.015458	0.782808	386	2	-5.683
DCDC2	9	0.75155	0.92213	0.999997	18333	2	-4.1621	0.0038716	0.015468	0.782808	387	3	-4.1621
CADPS	10	0.082965	0.28128	0.970712	5643	3	-1.8472	0.0038772	0.015915	0.782808	388	4	-1.8472
BPIFB3	9	0.19172	0.47319	0.999997	9241	3	-4.8251	0.0038958	0.015548	0.782808	389	2	-4.8251
GTF2A1L	7	0.60084	0.81888	0.999997	16719	3	1.3842	0.0039018	0.013657	0.76749	390	4	1.3842
PURG	8	0.10525	0.31274	0.984201	6517	3	-5.2324	0.0039024	0.015175	0.782808	391	2	-5.2324
ECSCR	9	0.99933	0.99931	0.999997	20361	0	-1.097	0.00391	0.015604	0.782808	392	4	-1.097
CSPP1	10	0.49882	0.79434	0.999997	15400	3	0.87682	0.0039255	0.016093	0.782808	393	5	0.87682
GAGE13	6	0.77275	0.88976	0.999997	18516	2	-0.54096	0.0039342	0.013562	0.76749	394	3	-0.54096
DTX3L	9	0.73526	0.91508	0.999997	18171	3	0.96216	0.0039371	0.015699	0.782808	395	5	0.96216
SPATA2L	9	0.37912	0.68809	0.999997	13484	3	1.1899	0.003943	0.015721	0.782808	396	5	1.1899
C3orf80	10	0.11271	0.34667	0.985935	6821	3	-2.2235	0.0039472	0.016171	0.782808	397	3	-2.2235
EIF2D	10	0.55646	0.83257	0.999997	16139	5	-5.2723	0.0039639	0.016234	0.782808	398	2	-5.2723
TRIM62	8	0.23683	0.5209	0.999997	10499	4	-2.144	0.0039719	0.015373	0.782808	399	3	-2.144
CD80	10	0.18736	0.48291	0.999997	9133	4	-1.6553	0.0039743	0.016273	0.782808	400	5	-1.6553
PRAMEF1	7	0.35429	0.63291	0.999997	13000	4	-5.2067	0.0040021	0.013954	0.769079	401	3	-5.2067
PPP1R17	9	0.85286	0.95426	0.999997	19163	2	-3.1466	0.0040148	0.015983	0.782808	402	4	-3.1466
PCDHA7	3	0.13624	0.27942	0.968486	7616	1	2.8214	0.0040255	0.010782	0.738604	403	2	2.8214
PIAS4	10	0.77498	0.93449	0.999997	18534	3	-4.3271	0.004037	0.016501	0.782808	404	3	-4.3271
CTDNEP1	10	0.024862	0.11403	0.858889	2559	4	-2.5318	0.0040409	0.01651	0.782808	405	4	-2.5318
ABCD3	8	0.21607	0.49378	0.999997	9918	3	-1.3494	0.0040516	0.015612	0.782808	406	3	-1.3494
FNDC9	9	0.8336	0.94773	0.999997	19003	3	-4.3876	0.0040728	0.016198	0.782808	407	4	-4.3876
MKRN2	10	0.20439	0.5058	0.999997	9631	4	-0.62286	0.0040809	0.016653	0.782808	408	4	-0.62286
SYT13	9	0.1072	0.32768	0.984525	6589	5	-6.2987	0.004116	0.016364	0.782808	409	2	-6.2987
TNFAIP6	9	0.17591	0.44806	0.999997	8834	5	-6.3273	0.0041176	0.016369	0.782808	410	4	-6.3273
P4HB	10	0.84538	0.95945	0.999997	19095	3	-2.7018	0.0041274	0.016821	0.782808	411	3	-2.7018
ANKIB1	8	0.99635	0.99636	0.999997	20303	0	-1.5068	0.0041316	0.015859	0.782808	412	3	-1.5068
TUBB4B	8	0.33425	0.63851	0.999997	12612	5	-5.368	0.004146	0.015895	0.782808	413	3	-5.368
PITPNB	8	0.78476	0.92167	0.999997	18607	2	-5.4453	0.0041596	0.015939	0.782808	414	3	-5.4453
GATAD2A	9	0.42476	0.72879	0.999997	14276	4	-5.9911	0.004177	0.016585	0.782808	415	2	-5.9911
ZFP36L2	9	0.57612	0.83277	0.999997	16394	3	0.98599	0.0041914	0.016639	0.782808	416	5	0.98599
OR5T3	8	0.78189	0.92045	0.999997	18584	2	-2.6943	0.0042102	0.016107	0.782808	417	2	-2.6943
LY6E	10	0.23771	0.54885	0.999997	10524	6	-6.0085	0.0042242	0.017168	0.782808	418	4	-6.0085
ACSM2A	9	0.104	0.32155	0.984525	6469	6	-6.3881	0.0042435	0.016814	0.782808	419	2	-6.3881
GPR52	9	0.57051	0.82981	0.999997	16320	3	-2.1061	0.0042739	0.01692	0.782808	420	3	-2.1061
NUP62	7	0.46699	0.73666	0.999997	14920	1	1.3875	0.0042787	0.014843	0.782808	421	4	1.3875
OR6K2	8	0.46393	0.74443	0.999997	14872	4	-5.5934	0.0042852	0.016362	0.782808	422	2	-5.5934
RAP1A	9	0.2843	0.59684	0.999997	11601	4	1.1517	0.0042929	0.016984	0.782808	423	5	1.1517
GAGE2A	3	0.99433	0.99444	0.999997	20265	0	2.8316	0.0043168	0.01129	0.752912	424	2	2.8316
FKBP3	9	0.88138	0.96421	0.999997	19362	2	-5.642	0.0043206	0.017079	0.782808	425	3	-5.642
BTBD9	9	0.71036	0.90244	0.999997	17893	4	-5.0918	0.0043268	0.017106	0.782808	426	3	-5.0918
CELSR3	9	0.36415	0.67441	0.999997	13205	5	-5.4779	0.004336	0.017144	0.782808	427	1	-5.4779
KRT13	10	0.1323	0.38644	0.999997	7501	5	-3.075	0.0043578	0.017661	0.789544	428	3	-3.075
AL359091	10	0.47795	0.78008	0.999997	15088	1	0.62701	0.0043651	0.017683	0.789544	429	4	0.62701
FBXW7	8	0.382	0.68468	0.999997	13536	2	0.60062	0.0043656	0.016589	0.782808	430	4	0.60062
LILRB3	10	0.057157	0.21983	0.949845	4428	6	-5.8325	0.0043821	0.017748	0.789544	431	2	-5.8325
KRTAP12-2	9	0.32442	0.63659	0.999997	12393	4	-4.4975	0.0043849	0.017326	0.786864	432	2	-4.4975
MIA3	10	0.073586	0.25957	0.963207	5237	3	-2.2522	0.0043908	0.017777	0.789544	433	4	-2.2522
ST3GAL3	9	0.41621	0.72129	0.999997	14127	4	-1.2864	0.0044078	0.017408	0.788834	434	4	-1.2864
CAPN3	8	0.95723	0.98286	0.999997	19944	2	-4.9425	0.0044204	0.016755	0.782808	435	2	-4.9425
SHCBP1	10	0.46009	0.76762	0.999997	14803	5	-5.452	0.0044364	0.017936	0.789544	436	4	-5.452
CNOT8	8	0.64076	0.86341	0.999997	17188	3	-3.7873	0.004454	0.016838	0.782808	437	3	-3.7873
UFSP2	8	0.90596	0.96537	0.999997	19561	2	0.86585	0.0044586	0.016851	0.782808	438	4	0.86585
TMEM167B	7	0.56249	0.79838	0.999997	16207	2	-0.83787	0.0044665	0.0154	0.782808	439	3	-0.83787
ARSF	8	0.71572	0.89304	0.999997	17951	2	-1.9756	0.0045142	0.017015	0.782808	440	2	-1.9756
KCNMB2	9	0.96009	0.98596	0.999997	19965	2	0.53946	0.0045254	0.017832	0.789544	441	4	0.53946
PRPH	9	0.11007	0.33309	0.984525	6719	3	0.92114	0.0045268	0.017837	0.789544	442	5	0.92114
RNF14	8	0.9671	0.98651	0.999997	20021	1	0.70917	0.0045548	0.017136	0.782808	443	3	0.70917
APOA4	8	0.49533	0.76654	0.999997	15350	4	-5.5309	0.0045725	0.017187	0.782808	444	2	-5.5309
C8B	8	0.01674	0.076609	0.788593	1999	4	-5.5661	0.0045739	0.017189	0.782808	445	3	-5.5661
KATNAL1	8	0.3073	0.60748	0.999997	12054	2	-4.1588	0.004577	0.017198	0.782808	446	3	-4.1588
ZNF233	7	0.73766	0.89356	0.999997	18189	2	-0.10985	0.0045818	0.015752	0.782808	447	3	-0.10985
ST20	6	0.19674	0.42979	0.999997	9401	4	-6.0656	0.004586	0.015655	0.782808	448	2	-6.0656
PRELP	9	0.2912	0.60378	0.999997	11736	3	0.93782	0.004592	0.018081	0.789544	449	5	0.93782
BTBD8	9	0.44439	0.74568	0.999997	14574	2	-4.894	0.0046055	0.018138	0.789544	450	3	-4.894
PRKACA	10	0.10391	0.32796	0.984525	6461	5	-5.7971	0.0046411	0.018647	0.789544	451	3	-5.7971
HAUS4	9	0.97636	0.99131	0.999997	20094	2	-3.8751	0.0046466	0.018295	0.789544	452	2	-3.8751
DRAP1	8	0.89634	0.96274	0.999997	19492	2	-3.7881	0.0046811	0.017502	0.789544	453	3	-3.7881
ZNF432	9	0.014878	0.073843	0.785302	1844	4	-4.7453	0.0046932	0.01847	0.789544	454	2	-4.7453
DCHS2	8	0.6998	0.88663	0.999997	17785	2	-2.6268	0.0046944	0.017547	0.789544	455	3	-2.6268
DYNLT1	7	0.34248	0.62154	0.999997	12764	3	-5.4653	0.004708	0.016137	0.782808	456	2	-5.4653
MID1IP1	7	0.99639	0.99635	0.999997	20305	0	1.3129	0.004738	0.016224	0.782808	457	4	1.3129
OVOL3	10	0.3134	0.63927	0.999997	12170	5	-5.6236	0.0047453	0.019023	0.789544	458	2	-5.6236
C12orf61	10	0.68747	0.8995	0.999997	17649	4	-4.1477	0.0047548	0.019054	0.789544	459	3	-4.1477
LCNL1	10	0.7527	0.92559	0.999997	18342	4	-4.0896	0.0047623	0.019077	0.789544	460	2	-4.0896
CGB8	9	0.34828	0.65934	0.999997	12895	2	0.9689	0.0047673	0.01873	0.789544	461	5	0.9689
SEC22A	9	0.043853	0.17054	0.910613	3739	2	0.87711	0.0047693	0.018736	0.789544	462	5	0.87711
COMMD8	8	0.48121	0.75661	0.999997	15143	4	-1.8944	0.0048127	0.017883	0.789544	463	4	-1.8944
FLT3LG	9	0.32008	0.63239	0.999997	12312	5	-5.2383	0.0048249	0.018935	0.789544	464	2	-5.2383
LRRC37A	9	0.10456	0.32262	0.984525	6485	3	0.61749	0.0048269	0.018942	0.789544	465	4	0.61749
BANK1	7	0.59888	0.81782	0.999997	16703	2	1.6738	0.0048396	0.01654	0.782808	466	4	1.6738
FRMD7	9	0.89457	0.96895	0.999997	19475	2	-0.28562	0.0048475	0.019012	0.789544	467	3	-0.28562
ACVRL1	9	0.66182	0.87759	0.999997	17397	2	-0.67412	0.0048654	0.019076	0.789544	468	4	-0.67412
TBCCD1	9	0.64379	0.86818	0.999997	17224	4	-5.2906	0.0048738	0.019105	0.789544	469	2	-5.2906
NGFRAP1	9	0.85945	0.95649	0.999997	19207	3	-1.1212	0.0048755	0.019108	0.789544	470	4	-1.1212
FAM96A	9	0.7684	0.9272	0.999997	18476	3	-3.8845	0.0048811	0.019127	0.789544	471	4	-3.8845
RP1-4G17	6	0.99992	0.99992	0.999997	20382	0	1.3212	0.004885	0.016616	0.782808	472	4	1.3212
DUSP26	10	0.61746	0.87065	0.999997	16911	2	0.78056	0.0049001	0.019563	0.789838	473	5	0.78056
WDR5	9	0.57888	0.83418	0.999997	16433	2	-4.9975	0.0049185	0.019271	0.789838	474	2	-4.9975
WIPF2	8	0.44324	0.72948	0.999997	14559	3	-2.7721	0.0049276	0.018229	0.789544	475	3	-2.7721
ELMO2	9	0.16219	0.42543	0.999997	8460	5	-5.193	0.0049423	0.019356	0.789838	476	4	-5.193
RIBC1	10	0.54089	0.82241	0.999997	15952	4	-2.114	0.0049786	0.019846	0.789838	477	3	-2.114
KCTD16	8	0.57599	0.8218	0.999997	16388	3	-6.1508	0.0049853	0.018399	0.789544	478	1	-6.1508
KDM2B	6	0.97706	0.97831	0.999997	20098	1	1.0985	0.0050091	0.017022	0.782808	479	4	1.0985
NPAS3	8	0.89893	0.96343	0.999997	19509	2	-2.2712	0.0050287	0.018512	0.789544	480	2	-2.2712
DCAF10	10	0.98365	0.99449	0.999997	20148	2	0.39188	0.0050359	0.020047	0.789838	481	5	0.39188
RNF24	9	0.035543	0.14528	0.888638	3246	4	-3.9109	0.0050377	0.019698	0.789838	482	3	-3.9109
ATP9B	9	0.94184	0.98122	0.999997	19831	2	0.93864	0.0050498	0.019742	0.789838	483	5	0.93864
HYI	9	0.29926	0.61182	0.999997	11908	2	0.73821	0.0050682	0.0198	0.789838	484	4	0.73821
ACY1	9	0.066806	0.23492	0.952746	4914	3	-4.1915	0.0050693	0.019804	0.789838	485	2	-4.1915
SYT12	9	0.28208	0.59458	0.999997	11551	4	-1.5058	0.0050745	0.019821	0.789838	486	4	-1.5058
LEPREL4	5	0.45995	0.68717	0.999997	14798	2	-5.7433	0.0050759	0.015271	0.782808	487	1	-5.7433
N4BP1	9	0.21779	0.51333	0.999997	9960	2	0.85833	0.0050763	0.019833	0.789838	488	5	0.85833
MED24	9	0.42333	0.72755	0.999997	14239	3	-4.5217	0.0050912	0.0199	0.789838	489	2	-4.5217
BHLHE40	9	0.12026	0.35186	0.990008	7118	6	-5.4331	0.0050952	0.019916	0.789838	490	3	-5.4331
CD7	9	0.22853	0.52912	0.999997	10264	3	-3.5169	0.0051103	0.019974	0.789838	491	4	-3.5169
C1orf51	10	0.025075	0.11479	0.860763	2583	3	-0.32267	0.0051107	0.020299	0.791866	492	5	-0.32267
PRAMEF4	8	0.73896	0.90251	0.999997	18204	3	-1.2616	0.0051238	0.018781	0.789544	493	4	-1.2616
CEP85L	9	0.46692	0.76489	0.999997	14917	3	-0.55854	0.0051457	0.020102	0.789838	494	3	-0.55854
MYLK4	7	0.67624	0.8596	0.999997	17545	3	-5.0296	0.005162	0.017543	0.789544	495	2	-5.0296
GTF2E2	8	0.22812	0.50957	0.999997	10244	2	-4.8449	0.0052025	0.019006	0.789544	496	1	-4.8449
CYB5A	9	0.86724	0.95918	0.999997	19263	2	0.79583	0.0052044	0.020301	0.791866	497	5	0.79583
ZNF510	10	0.95229	0.9878	0.999997	19908	2	-4.7739	0.0052228	0.020673	0.791866	498	3	-4.7739
SHC2	10	0.031632	0.138	0.885184	2989	4	-1.6938	0.0052464	0.020756	0.791866	499	5	-1.6938
C11orf89	9	0.98928	0.99439	0.999997	20206	1	0.77045	0.0052504	0.020486	0.791866	500	5	0.77045
STOM	10	0.089507	0.29617	0.981149	5905	6	-5.8814	0.005251	0.020775	0.791866	501	1	-5.8814
NPIPA5	9	0.14342	0.39329	0.999997	7878	5	-5.2895	0.0052596	0.020513	0.791866	502	4	-5.2895
RP11-94B19	5	0.95307	0.95567	0.999997	19917	1	1.9183	0.0052661	0.015754	0.782808	503	3	1.9183
SCGB2B2	8	0.41833	0.71134	0.999997	14159	3	-4.8381	0.0052791	0.019229	0.789838	504	3	-4.8381
GGTLC2	10	0.14618	0.41345	0.999997	7933	5	-5.9684	0.0052985	0.020933	0.794891	505	4	-5.9684
ZFYVE28	9	0.36856	0.6785	0.999997	13292	2	0.78505	0.0053224	0.02072	0.791866	506	5	0.78505
C19orf73	8	0.18818	0.45589	0.999997	9149	4	-2.4471	0.0053277	0.019365	0.789838	507	4	-2.4471
C18orf64	8	0.27782	0.57227	0.999997	11450	5	-5.3667	0.005334	0.019384	0.789838	508	2	-5.3667
ARG1	10	0.91627	0.97784	0.999997	19647	3	-0.62358	0.0053407	0.021078	0.796635	509	4	-0.62358
TAF9B	9	0.22589	0.52527	0.999997	10194	4	-5.5998	0.0053625	0.020865	0.793788	510	2	-5.5998
SPPL2C	8	0.17921	0.44326	0.999997	8918	3	-1.5369	0.0053654	0.019469	0.789838	511	4	-1.5369
CLK3	7	0.75646	0.90399	0.999997	18384	2	1.5523	0.0053913	0.018255	0.789544	512	4	1.5523
FAM189A1	9	0.31059	0.62297	0.999997	12131	4	-5.7806	0.0053997	0.020987	0.795475	513	2	-5.7806
RNF167	7	0.89864	0.95525	0.999997	19504	2	0.33123	0.0054293	0.018367	0.789544	514	2	0.33123
CCDC174	7	0.56944	0.80214	0.999997	16313	3	-5.1515	0.0054572	0.018457	0.789544	515	3	-5.1515
TPSD1	9	0.48958	0.78348	0.999997	15265	4	-1.2864	0.0054602	0.021201	0.796884	516	3	-1.2864
HOXC10	8	0.52008	0.78381	0.999997	15664	4	-4.8873	0.0054631	0.019752	0.789838	517	2	-4.8873
C6ORF165	9	0.68543	0.88972	0.999997	17626	4	-5.0373	0.0054679	0.021227	0.796884	518	3	-5.0373
IGKV1D-13	10	0.69582	0.90288	0.999997	17748	2	-0.36406	0.0054721	0.021529	0.800947	519	4	-0.36406
RPL23A	8	0.63482	0.86059	0.999997	17114	2	-1.1453	0.0054755	0.019794	0.789838	520	4	-1.1453
KRT36	9	0.56891	0.82895	0.999997	16306	3	0.79157	0.0054836	0.021298	0.796884	521	5	0.79157
CYP26C1	9	0.020315	0.095864	0.827632	2275	4	-6.1052	0.0055135	0.021402	0.799305	522	2	-6.1052
SRD5A1	9	0.48102	0.77658	0.999997	15138	3	0.87352	0.0055399	0.021505	0.800947	523	5	0.87352
SSX1	10	0.99999	0.99999	0.999997	20391	0	0.79128	0.0055621	0.021871	0.803601	524	5	0.79128
TBX19	6	0.25951	0.51335	0.999997	11052	3	-2.9522	0.0055632	0.018753	0.789544	525	2	-2.9522
CNBD1	7	0.44782	0.71982	0.999997	14609	4	-6.4127	0.005573	0.018809	0.789544	526	3	-6.4127
APCDD1	9	0.50256	0.79331	0.999997	15452	3	0.65814	0.0055763	0.021642	0.800947	527	4	0.65814
FAM84B	8	0.042286	0.1621	0.904984	3652	4	-2.4137	0.0055878	0.020102	0.789838	528	4	-2.4137
BTG1	10	0.00080668	0.0060019	0.463603	245	5	-2.5225	0.0055885	0.021958	0.803601	529	5	-2.5225
MNDA	10	0.55217	0.82977	0.999997	16080	3	-2.0189	0.0055916	0.021965	0.803601	530	5	-2.0189
USP17L13	10	0.035289	0.15062	0.892843	3237	4	-2.8883	0.0056083	0.022029	0.803601	531	3	-2.8883
SRSF2	7	0.2169	0.48789	0.999997	9936	3	-5.0918	0.005619	0.018947	0.789544	532	2	-5.0918
LMO4	6	0.88016	0.94255	0.999997	19354	2	-4.1268	0.005632	0.018972	0.789544	533	1	-4.1268
CR769776	10	0.77627	0.93501	0.999997	18549	2	-1.9322	0.0056483	0.022154	0.805289	534	5	-1.9322
HPCA	8	0.059484	0.20634	0.943184	4551	5	-5.918	0.0056528	0.020287	0.791866	535	3	-5.918
DMXL1	9	0.37939	0.68834	0.999997	13485	4	0.35828	0.0056656	0.021962	0.803601	536	3	0.35828
R3HDM2	8	0.6322	0.85888	0.999997	17085	2	-3.2333	0.0056957	0.020417	0.791866	537	3	-3.2333
AMOTL2	9	0.15134	0.40705	0.999997	8097	5	-5.9734	0.0057044	0.022087	0.80427	538	2	-5.9734
DPY19L4	10	0.70466	0.90637	0.999997	17836	3	-4.215	0.0057321	0.022463	0.808288	539	3	-4.215
ZNF587	8	0.10041	0.30215	0.984049	6328	3	-4.9705	0.005767	0.020618	0.791866	540	1	-4.9705
NARF	9	0.94253	0.9814	0.999997	19835	2	-0.8323	0.0057757	0.022338	0.808288	541	4	-0.8323
CEP104	9	0.91014	0.97477	0.999997	19603	2	-5.5115	0.0058021	0.022429	0.808288	542	1	-5.5115
TNXB	9	0.90463	0.97268	0.999997	19550	3	0.73658	0.0058159	0.022484	0.808288	543	5	0.73658
GP2	9	0.082815	0.27674	0.968486	5632	4	0.84264	0.0058775	0.022715	0.811094	544	5	0.84264
UBE2B	10	0.29009	0.6124	0.999997	11712	2	1.1421	0.0059022	0.023064	0.811094	545	5	1.1421
OR4C12	10	0.23699	0.54795	0.999997	10507	6	-6.1746	0.0059023	0.023064	0.811094	546	1	-6.1746
SPATA31A5	9	0.88933	0.96706	0.999997	19442	2	0.83114	0.0059085	0.022833	0.811094	547	5	0.83114
CRYBG3	10	0.11473	0.3509	0.988347	6895	5	-2.7273	0.005925	0.023144	0.811094	548	4	-2.7273
PRSS8	9	0.22525	0.52433	0.999997	10173	3	-0.95156	0.0059284	0.022907	0.811094	549	4	-0.95156
ATPIF1	7	0.98267	0.98556	0.999997	20140	1	0.16314	0.005931	0.019873	0.789838	550	3	0.16314
CCL4	7	0.51905	0.77514	0.999997	15650	1	-3.8204	0.0059563	0.019952	0.789838	551	3	-3.8204
FAM129A	10	0.66615	0.89106	0.999997	17443	2	-4.0847	0.0059569	0.023259	0.811094	552	4	-4.0847
PNMA5	10	0.015005	0.076539	0.788593	1857	5	-3.2764	0.0059598	0.023268	0.811094	553	4	-3.2764
PTPRD	9	0.71102	0.90278	0.999997	17900	3	-4.9636	0.0059731	0.023065	0.811094	554	3	-4.9636
EXOC3L4	10	0.023202	0.10797	0.852359	2453	5	-4.9767	0.0059898	0.023367	0.81274	555	3	-4.9767
TMEM219	7	0.93525	0.97207	0.999997	19780	1	1.2519	0.0059966	0.020066	0.789838	556	4	1.2519
LYSMD4	10	0.75513	0.92654	0.999997	18364	4	-5.1466	0.0060108	0.023436	0.81274	557	2	-5.1466
FBXO4	10	0.44646	0.75805	0.999997	14582	4	-2.0051	0.0060721	0.02365	0.81274	558	5	-2.0051
PSMC5	7	0.092373	0.27225	0.966031	6013	3	-5.8721	0.0060881	0.020331	0.791866	559	2	-5.8721
ALG10	9	0.96626	0.98779	0.999997	20015	2	0.69134	0.0061251	0.023623	0.81274	560	5	0.69134
CYTH1	9	0.0095075	0.049928	0.738289	1356	5	-5.354	0.0061283	0.023632	0.81274	561	3	-5.354
MB21D1	7	0.40703	0.6828	0.999997	13969	3	1.3289	0.0061392	0.020476	0.791866	562	4	1.3289
NUDT16L1	9	0.14319	0.3929	0.999997	7855	3	-0.2989	0.006141	0.023674	0.81274	563	3	-0.2989
FAM133B	7	0.49558	0.76139	0.999997	15353	1	-3.6066	0.0061452	0.020491	0.791866	564	2	-3.6066
CFL2	10	0.6097	0.86595	0.999997	16836	4	-5.7517	0.0061735	0.024009	0.813656	565	3	-5.7517
RP1-139D8	9	6.0233e-08	2.4277e-07	0.00165	3	3	-4.9975	0.0061741	0.023783	0.813656	566	3	-4.9975
PROKR1	7	0.68533	0.86459	0.999997	17622	3	-4.6993	0.0061766	0.020608	0.791866	567	3	-4.6993
EEF1A1	10	0.71323	0.9098	0.999997	17924	3	-5.0059	0.0061824	0.024047	0.813656	568	3	-5.0059
JMJD7-PLA2G4B	6	0.87842	0.94157	0.999997	19337	1	0.83827	0.0061887	0.02073	0.791866	569	4	0.83827
GADL1	9	0.01572	0.077338	0.788973	1918	2	-5.368	0.0062103	0.02392	0.813656	570	2	-5.368
SUV39H1	8	0.69206	0.88351	0.999997	17704	2	-0.69046	0.0062225	0.021933	0.803601	571	3	-0.69046
FKRP	9	0.40715	0.71329	0.999997	13974	4	-1.8536	0.0062415	0.024038	0.813656	572	2	-1.8536
MECP2	8	0.99751	0.99753	0.999997	20322	0	-2.1205	0.0062445	0.021992	0.803601	573	3	-2.1205
GPR85	10	0.70588	0.90684	0.999997	17852	4	-5.5381	0.006292	0.024393	0.813656	574	4	-5.5381
RBMXL2	7	0.23865	0.51554	0.999997	10544	4	-6.2449	0.0063398	0.021096	0.796635	575	1	-6.2449
UQCRH	5	0.45095	0.67888	0.999997	14668	2	0.74981	0.0063452	0.018389	0.789544	576	2	0.74981
WDR18	7	0.01242	0.056473	0.764898	1612	4	-6.0393	0.0063593	0.021155	0.796884	577	2	-6.0393
HIST1H2AM	9	0.065719	0.23197	0.952746	4854	6	-7.0362	0.0063636	0.024423	0.813656	578	1	-7.0362
AC005609	9	0.097176	0.30848	0.984201	6183	4	-5.1389	0.0063642	0.024427	0.813656	579	4	-5.1389
FRG1	6	0.99937	0.99937	0.999997	20362	0	1.3617	0.0063667	0.021289	0.796884	580	4	1.3617
HEXIM1	8	0.96215	0.98495	0.999997	19982	2	-5.1665	0.0064181	0.022483	0.808288	581	3	-5.1665
C2orf81	8	0.99485	0.99496	0.999997	20274	1	0.85195	0.006442	0.022546	0.808288	582	4	0.85195
BAIAP2L2	8	0.67813	0.87804	0.999997	17570	2	-1.4864	0.006459	0.022595	0.808346	583	4	-1.4864
DOC2B	10	0.96564	0.99019	0.999997	20009	2	0.63105	0.0064668	0.025004	0.813656	584	5	0.63105
INTS9	9	0.86445	0.95822	0.999997	19244	3	-5.2638	0.0064693	0.024719	0.813656	585	2	-5.2638
C14orf144	10	0.02819	0.12595	0.881529	2768	3	0.33263	0.0064832	0.025061	0.813656	586	5	0.33263
GOLGA6L20	10	0.5562	0.83241	0.999997	16134	2	-4.759	0.0064984	0.025108	0.813656	587	3	-4.759
HSF2BP	9	0.014225	0.071001	0.781366	1784	8	-5.5719	0.0065344	0.02489	0.813656	588	1	-5.5719
LYZL2	10	0.19659	0.49532	0.999997	9390	6	-5.8993	0.0065531	0.025297	0.813656	589	4	-5.8993
FAM19A1	10	0.50856	0.80094	0.999997	15520	5	-5.5705	0.0065593	0.025315	0.813656	590	3	-5.5705
TSPAN11	9	0.89694	0.96985	0.999997	19496	1	-0.19989	0.006566	0.02498	0.813656	591	4	-0.19989
GLE1	9	0.80741	0.93933	0.999997	18785	3	-3.5979	0.0065715	0.024995	0.813656	592	4	-3.5979
BAZ1A	7	0.22695	0.50301	0.999997	10216	1	1.2327	0.0065744	0.021803	0.803601	593	4	1.2327
SCARF1	10	0.0046537	0.028334	0.680539	794	5	-2.828	0.0065984	0.025459	0.813656	594	4	-2.828
C20orf196	10	0.065587	0.2406	0.954596	4849	5	-5.7739	0.0066073	0.025494	0.813656	595	2	-5.7739
EIF3K	8	0.81794	0.93612	0.999997	18861	1	-4.2242	0.0066126	0.023029	0.811094	596	3	-4.2242
POLR3G	10	0.061684	0.23106	0.952746	4660	5	-2.9386	0.0066134	0.025514	0.813656	597	4	-2.9386
C9orf169	10	0.23141	0.54093	0.999997	10349	4	-4.6693	0.0066207	0.025534	0.813656	598	3	-4.6693
IGHV5-51	10	0.74833	0.92383	0.999997	18301	4	-3.2169	0.0066258	0.025551	0.813656	599	4	-3.2169
GIPC1	9	0.87262	0.96106	0.999997	19294	1	-4.9239	0.0066324	0.025175	0.813656	600	4	-4.9239
GFRA3	8	0.13098	0.3664	0.995301	7473	5	-5.6386	0.0066405	0.023105	0.811094	601	3	-5.6386
SV2A	9	0.40146	0.70832	0.999997	13864	4	-4.1756	0.0066679	0.025271	0.813656	602	3	-4.1756
GLRA1	9	0.46418	0.76261	0.999997	14880	4	-4.9975	0.0066825	0.025314	0.813656	603	4	-4.9975
DEGS2	9	0.4422	0.74383	0.999997	14535	3	-2.8602	0.006692	0.025341	0.813656	604	4	-2.8602
NRN1	8	0.48572	0.75974	0.999997	15215	3	0.30369	0.0066929	0.023253	0.811094	605	4	0.30369
DDX58	9	0.36631	0.67642	0.999997	13244	2	0.38384	0.0067118	0.025401	0.813656	606	4	0.38384
AL160175	4	0.75458	0.83546	0.999997	18355	1	1.1707	0.0067545	0.018228	0.789544	607	3	1.1707
TATDN1	8	0.36978	0.67554	0.999997	13309	4	-5.8174	0.0067651	0.023466	0.81274	608	2	-5.8174
RP11-521M14	2	0.85798	0.85796	0.999997	19193	0	1.0396	0.00679	0.013018	0.763185	609	1	1.0396
TNFRSF13B	10	0.48207	0.78286	0.999997	15161	5	-4.7899	0.0068004	0.026139	0.813656	610	4	-4.7899
GPC4	7	0.63612	0.83787	0.999997	17132	2	1.1386	0.0068185	0.022554	0.808288	611	4	1.1386
IGKJ1	3	0.78161	0.79845	0.999997	18582	1	2.5045	0.0068249	0.015736	0.782808	612	2	2.5045
ZBTB8OS	8	0.054922	0.19491	0.929932	4316	5	-5.729	0.0068792	0.023787	0.813656	613	3	-5.729
CDK3	9	0.25816	0.56999	0.999997	11025	3	-4.1348	0.0068897	0.025861	0.813656	614	3	-4.1348
C1orf168	9	0.010638	0.055147	0.757449	1444	7	-6.3468	0.0069247	0.025956	0.813656	615	2	-6.3468
AP1M2	7	0.48694	0.75403	0.999997	15232	4	-5.196	0.0069282	0.022884	0.811094	616	1	-5.196
FAM57A	9	0.28642	0.59893	0.999997	11648	4	-5.8543	0.0069735	0.026097	0.813656	617	3	-5.8543
STYK1	10	0.19713	0.49605	0.999997	9418	6	-5.6498	0.0069822	0.026743	0.813656	618	3	-5.6498
GRPR	10	0.26394	0.58131	0.999997	11142	6	-5.8358	0.0070126	0.026838	0.813656	619	3	-5.8358
TPH2	9	0.9403	0.98086	0.999997	19823	1	-2.9024	0.0070146	0.026221	0.813656	620	2	-2.9024
TPSG1	9	0.83615	0.94858	0.999997	19024	3	-5.1515	0.0070175	0.026229	0.813656	621	3	-5.1515
C9orf64	8	0.95938	0.98376	0.999997	19959	1	-4.4619	0.0070254	0.024218	0.813656	622	1	-4.4619
RWDD3	8	0.3868	0.68821	0.999997	13631	3	-4.4653	0.0070279	0.024223	0.813656	623	2	-4.4653
MFSD12	9	0.78178	0.93127	0.999997	18583	2	0.29401	0.0070311	0.026264	0.813656	624	4	0.29401
NLRP1	10	0.25206	0.56686	0.999997	10889	3	-2.1661	0.0070412	0.026934	0.813656	625	4	-2.1661
SLC38A8	10	0.25635	0.57214	0.999997	10983	6	-6.1719	0.0070681	0.02703	0.813656	626	3	-6.1719
RCN2	10	0.080014	0.27454	0.966031	5525	4	-0.27092	0.007121	0.027207	0.813656	627	5	-0.27092
OPHN1	8	0.59001	0.83109	0.999997	16585	3	1.1123	0.0071479	0.024578	0.813656	628	4	1.1123
KLHL25	6	0.70941	0.86354	0.999997	17883	1	-4.2733	0.0071508	0.023205	0.811094	629	2	-4.2733
TTPAL	8	0.6572	0.86977	0.999997	17356	2	-4.7499	0.0071781	0.024672	0.813656	630	3	-4.7499
ALDH1A1	8	0.33336	0.63755	0.999997	12586	2	-0.5962	0.0071988	0.024733	0.813656	631	3	-0.5962
SPIRE1	10	0.1715	0.46069	0.999997	8726	3	-0.18449	0.0071997	0.027463	0.813656	632	4	-0.18449
NUDT17	9	0.29544	0.60794	0.999997	11834	2	-4.7499	0.0072287	0.026819	0.813656	633	2	-4.7499
ZNF277	9	0.026257	0.11564	0.860763	2644	4	-5.4512	0.0072391	0.026848	0.813656	634	2	-5.4512
ADRBK1	8	0.52032	0.78399	0.999997	15665	2	-0.60159	0.0072391	0.024847	0.813656	635	3	-0.60159
POF1B	9	0.60996	0.85051	0.999997	16841	2	-6.0393	0.0072495	0.02687	0.813656	636	3	-6.0393
SUCO	8	0.72902	0.89845	0.999997	18086	2	0.26052	0.0072573	0.024905	0.813656	637	4	0.26052
FAAH	9	0.024903	0.11122	0.856986	2561	4	-6.034	0.0072583	0.026888	0.813656	638	3	-6.034
FAM83D	9	0.57612	0.83277	0.999997	16393	3	-1.4306	0.0072599	0.026893	0.813656	639	2	-1.4306
CMPK2	9	0.28709	0.59959	0.999997	11659	4	-5.8179	0.0072838	0.026958	0.813656	640	3	-5.8179
IGLV3-22	6	0.68555	0.85429	0.999997	17631	1	-2.4276	0.0072921	0.023519	0.81274	641	1	-2.4276
PRSS55	10	0.98863	0.99616	0.999997	20194	2	-1.3767	0.0073139	0.027838	0.813656	642	5	-1.3767
SLC35E3	8	0.36818	0.67432	0.999997	13275	3	0.58571	0.0073183	0.025088	0.813656	643	4	0.58571
SEL1L2	9	0.28543	0.59796	0.999997	11626	4	-1.5997	0.0073234	0.02708	0.813656	644	4	-1.5997
CSRNP3	9	0.4156	0.72074	0.999997	14116	3	-5.4175	0.0074125	0.027328	0.813656	645	2	-5.4175
BROX	7	0.93937	0.97353	0.999997	19815	1	0.83255	0.0074141	0.02435	0.813656	646	4	0.83255
PDE6G	8	0.35667	0.66345	0.999997	13059	2	-3.9132	0.0074278	0.025417	0.813656	647	3	-3.9132
PUS10	8	0.37126	0.67666	0.999997	13339	2	1.1797	0.007473	0.025555	0.813656	648	4	1.1797
FANCD2OS	10	0.2814	0.60227	0.999997	11537	6	-5.4516	0.0074799	0.028425	0.813656	649	3	-5.4516
ALDH1L1	10	0.11374	0.34885	0.987194	6858	4	-0.76075	0.0075199	0.028571	0.813656	650	5	-0.76075
VHLL	9	0.67237	0.88303	0.999997	17511	2	-5.5998	0.0075426	0.027692	0.813656	651	4	-5.5998
MYCBPAP	10	0.18984	0.48626	0.999997	9197	6	-5.386	0.0075567	0.028689	0.813656	652	3	-5.386
DEFB125	10	0.40243	0.72645	0.999997	13876	5	-5.3198	0.0075829	0.02878	0.813656	653	1	-5.3198
CCT2	6	0.97455	0.97657	0.999997	20085	1	-5.3038	0.007601	0.024244	0.813656	654	1	-5.3038
PSMG1	10	0.61746	0.87065	0.999997	16910	3	0.1909	0.0076301	0.028934	0.813656	655	5	0.1909
OSBPL6	8	0.76304	0.9125	0.999997	18443	3	-5.6057	0.0076468	0.026061	0.813656	656	3	-5.6057
PAK1IP1	6	0.98809	0.98816	0.999997	20185	0	-3.3188	0.0076823	0.024429	0.813656	657	2	-3.3188
RP11-831H9	5	0.10348	0.26245	0.963894	6438	4	-6.6586	0.0076942	0.021593	0.800947	658	1	-6.6586
SLC35F3	9	0.26577	0.57792	0.999997	11182	4	-4.6554	0.0076999	0.028126	0.813656	659	4	-4.6554
TMEM60	5	0.70043	0.83166	0.999997	17798	2	-4.7318	0.0077103	0.021636	0.800947	660	2	-4.7318
GK2	10	0.015987	0.080436	0.795544	1942	6	-6.0738	0.0077112	0.029208	0.813656	661	2	-6.0738
TSPAN17	8	0.13326	0.37101	0.997305	7530	5	-6.3186	0.007719	0.026281	0.813656	662	1	-6.3186
TPRXL	9	0.096935	0.30801	0.984201	6172	4	-5.621	0.0077538	0.028265	0.813656	663	2	-5.621
FCGRT	7	0.93105	0.96994	0.999997	19750	2	1.1459	0.0077555	0.025388	0.813656	664	4	1.1459
EPS15L1	10	0.36805	0.69858	0.999997	13274	4	-1.5079	0.0077981	0.02951	0.813656	665	4	-1.5079
CPLX1	8	0.61041	0.84458	0.999997	16842	4	-5.4311	0.0077984	0.026516	0.813656	666	3	-5.4311
DMRTC2	9	0.88393	0.96511	0.999997	19384	2	-4.6863	0.0078103	0.028415	0.813656	667	2	-4.6863
TMIGD1	10	0.38762	0.71559	0.999997	13642	4	-2.0432	0.007816	0.029572	0.813656	668	5	-2.0432
ZBTB20	8	0.22051	0.49964	0.999997	10038	2	-4.281	0.0078365	0.026653	0.813656	669	3	-4.281
FKSG48	9	0.030519	0.12943	0.881529	2912	6	-5.5653	0.0078481	0.028516	0.813656	670	2	-5.5653
UCHL1	10	0.35719	0.68724	0.999997	13078	1	0.041887	0.0078512	0.029682	0.813656	671	5	0.041887
BAIAP2	9	0.17236	0.44227	0.999997	8742	2	-5.5341	0.0078513	0.028526	0.813656	672	2	-5.5341
SOST	8	0.23314	0.51614	0.999997	10413	3	0.88031	0.0078568	0.026714	0.813656	673	4	0.88031
PLA2G4A	9	0.13648	0.38102	0.999997	7632	3	-4.2793	0.007903	0.028657	0.813656	674	4	-4.2793
ERVFRD-1	7	0.1014	0.28977	0.976706	6364	2	-5.4416	0.0079051	0.025849	0.813656	675	2	-5.4416
CCDC113	10	0.99248	0.99683	0.999997	20245	1	-2.7464	0.0079078	0.029864	0.813656	676	2	-2.7464
IGHV3-15	10	0.077246	0.26832	0.964944	5388	3	-2.2415	0.0079381	0.029958	0.813656	677	4	-2.2415
MSANTD3-TMEFF1	3	0.73629	0.76927	0.999997	18179	1	-6.2312	0.0079396	0.017642	0.789544	678	1	-6.2312
PROM2	9	0.2344	0.53768	0.999997	10435	4	-5.0253	0.00794	0.028771	0.813656	679	3	-5.0253
NUDT11	10	0.50007	0.79519	0.999997	15421	1	-0.72238	0.0079407	0.029968	0.813656	680	4	-0.72238
TAX1BP3	7	0.74637	0.8984	0.999997	18281	2	-3.9173	0.0079634	0.026019	0.813656	681	2	-3.9173
OR52D1	8	0.86954	0.95604	0.999997	19274	2	-5.2785	0.007979	0.027072	0.813656	682	1	-5.2785
LCN2	10	0.89731	0.97261	0.999997	19500	3	-1.8262	0.0079899	0.030136	0.813656	683	5	-1.8262
LARS	9	0.014548	0.072396	0.781366	1815	5	-5.4254	0.0079975	0.028928	0.813656	684	1	-5.4254
FNTA	5	0.56255	0.75574	0.999997	16210	2	1.5384	0.0080008	0.02235	0.808288	685	3	1.5384
GPATCH2	8	0.92128	0.96988	0.999997	19681	2	-4.3844	0.0080224	0.027204	0.813656	686	1	-4.3844
H2BFWT	10	0.58292	0.84926	0.999997	16486	5	-4.9829	0.0080334	0.030295	0.813656	687	3	-4.9829
RBMXL1	9	0.0053882	0.030415	0.699225	873	6	-6.2258	0.0080543	0.029079	0.813656	688	2	-6.2258
CAB39L	10	0.92964	0.98182	0.999997	19744	1	-3.5525	0.0081244	0.030603	0.813656	689	4	-3.5525
AQP9	10	0.60827	0.86508	0.999997	16815	5	-4.8151	0.0081284	0.030618	0.813656	690	3	-4.8151
RP11-404P21	8	0.17654	0.4395	0.999997	8848	2	-0.049888	0.0081502	0.027564	0.813656	691	4	-0.049888
FAM188B2	9	0.61656	0.85393	0.999997	16906	3	-4.0526	0.0081583	0.029382	0.813656	692	3	-4.0526
USP24	8	0.19622	0.46705	0.999997	9383	4	-2.4778	0.0081719	0.027627	0.813656	693	4	-2.4778
SLC33A1	10	0.51447	0.8049	0.999997	15582	3	-5.6269	0.0081786	0.030787	0.813656	694	2	-5.6269
PPP2R5C	8	0.52198	0.78517	0.999997	15689	2	-3.0422	0.0081971	0.027701	0.813656	695	3	-3.0422
FAM20A	7	0.16423	0.40308	0.999997	8519	2	-0.93931	0.0081984	0.026692	0.813656	696	3	-0.93931
RP11-1105G2	7	0.59034	0.81329	0.999997	16592	1	-1.3105	0.008199	0.026696	0.813656	697	2	-1.3105
VCPIP1	8	0.50658	0.77438	0.999997	15493	2	-4.9233	0.008217	0.027763	0.813656	698	2	-4.9233
LGALS16	9	0.99876	0.99875	0.999997	20346	0	-1.5784	0.0082254	0.029556	0.813656	699	4	-1.5784
ACOT2	9	0.043266	0.1688	0.909644	3710	3	0.49298	0.0082544	0.029647	0.813656	700	4	0.49298
TMEM182	10	0.31693	0.64326	0.999997	12244	5	-3.0588	0.0082698	0.031095	0.813656	701	4	-3.0588
MAOB	10	0.22597	0.53407	0.999997	10195	4	-2.5872	0.0082789	0.031118	0.813656	702	4	-2.5872
CLEC4A	8	0.75482	0.90908	0.999997	18360	3	-2.9067	0.0082823	0.027945	0.813656	703	2	-2.9067
CRYGD	10	0.45498	0.76405	0.999997	14724	2	-5.1422	0.0082869	0.031148	0.813656	704	2	-5.1422
C7orf76	9	0.011127	0.05737	0.766628	1479	7	-6.257	0.0082899	0.029738	0.813656	705	1	-6.257
ANKK1	7	0.41362	0.68886	0.999997	14087	2	-4.3821	0.0082958	0.027006	0.813656	706	2	-4.3821
RSRC1	8	0.28468	0.58062	0.999997	11606	3	-4.2987	0.0082963	0.027985	0.813656	707	3	-4.2987
ARHGEF7	10	0.1154	0.35229	0.990008	6923	3	-1.584	0.008336	0.031317	0.813656	708	5	-1.584
OGT	10	0.12817	0.37819	0.999997	7366	7	-6.6986	0.008341	0.031334	0.813656	709	1	-6.6986
SPOCK1	9	0.021598	0.10018	0.844401	2347	5	-5.8721	0.0083523	0.029913	0.813656	710	3	-5.8721
NKIRAS2	7	0.37722	0.655	0.999997	13448	2	1.2446	0.0083892	0.027285	0.813656	711	4	1.2446
GPR27	10	0.76858	0.93193	0.999997	18478	4	-3.6277	0.0083916	0.031517	0.813656	712	3	-3.6277
LIMD2	9	0.20871	0.49961	0.999997	9739	3	-4.622	0.0083928	0.030019	0.813656	713	4	-4.622
ACTRT1	10	0.023236	0.1081	0.852359	2460	6	-5.7759	0.0083951	0.031529	0.813656	714	1	-5.7759
GTPBP1	9	0.97271	0.98999	0.999997	20072	2	-3.3415	0.0084092	0.030064	0.813656	715	3	-3.3415
OCM2	3	0.74356	0.77373	0.999997	18249	1	2.8732	0.0084108	0.018454	0.789544	716	2	2.8732
ZNF564	10	0.60567	0.86348	0.999997	16784	4	-2.045	0.0084471	0.031717	0.813656	717	5	-2.045
POLM	9	0.43017	0.73346	0.999997	14361	4	-0.078775	0.0084685	0.030227	0.813656	718	3	-0.078775
PLSCR1	9	0.038653	0.15485	0.897073	3439	3	0.6941	0.0084741	0.030239	0.813656	719	4	0.6941
GLS	9	0.8927	0.96831	0.999997	19464	3	-3.8369	0.0084919	0.030285	0.813656	720	3	-3.8369
SLC25A48	8	0.30129	0.60037	0.999997	11939	4	-2.0348	0.0084936	0.028537	0.813656	721	4	-2.0348
THRA	8	0.82385	0.93876	0.999997	18920	2	-1.165	0.0085109	0.028586	0.813656	722	4	-1.165
PELI3	7	0.38071	0.65833	0.999997	13518	4	-5.4691	0.0085137	0.027656	0.813656	723	2	-5.4691
PPAP2C	9	0.9276	0.97812	0.999997	19723	1	-2.5168	0.0085284	0.030379	0.813656	724	4	-2.5168
MRPL35	8	0.046731	0.17386	0.914581	3904	5	-5.5186	0.0085422	0.028692	0.813656	725	1	-5.5186
AC027228	8	0.28106	0.57619	0.999997	11529	3	-2.0203	0.0085652	0.028754	0.813656	726	4	-2.0203
MYO5B	7	0.5712	0.80309	0.999997	16327	1	1.3458	0.0085724	0.027824	0.813656	727	4	1.3458
NHLH1	7	0.54461	0.78872	0.999997	15989	3	-5.7616	0.008578	0.027843	0.813656	728	2	-5.7616
VWA2	9	0.62047	0.85601	0.999997	16947	4	-0.69754	0.0085814	0.030507	0.813656	729	3	-0.69754
CD226	9	0.3363	0.64806	0.999997	12645	4	-6.1011	0.0085919	0.030542	0.813656	730	2	-6.1011
SPRR4	9	0.0094001	0.049446	0.736608	1342	5	-6.6947	0.0085942	0.030555	0.813656	731	4	-6.6947
CREBL2	9	0.41771	0.72262	0.999997	14138	4	-5.7424	0.0086088	0.030603	0.813656	732	2	-5.7424
ANKRD62	6	0.17179	0.39484	0.999997	8734	3	-2.3586	0.0086422	0.026585	0.813656	733	3	-2.3586
TRAV35	9	0.0054386	0.030649	0.699347	879	3	-5.9243	0.0086482	0.030713	0.813656	734	3	-5.9243
KRTAP9-3	7	0.95032	0.97563	0.999997	19898	1	-1.9806	0.0086538	0.028074	0.813656	735	1	-1.9806
MKNK2	8	0.27306	0.56633	0.999997	11351	3	0.49786	0.0086665	0.029044	0.813656	736	4	0.49786
MFSD1	8	0.58199	0.8258	0.999997	16478	3	-5.8097	0.0086721	0.029058	0.813656	737	2	-5.8097
C1orf127	10	0.085156	0.28635	0.972222	5742	4	-2.0774	0.0086752	0.032537	0.822046	738	3	-2.0774
OR4N2	7	0.99493	0.99489	0.999997	20275	0	0.96937	0.0086927	0.028196	0.813656	739	4	0.96937
APLNR	9	0.37002	0.67982	0.999997	13312	2	-0.7821	0.0086934	0.030849	0.813656	740	3	-0.7821
HSBP1L1	9	0.099833	0.31355	0.984201	6305	5	-5.9621	0.0087284	0.030949	0.813656	741	3	-5.9621
VAX1	8	0.31835	0.62042	0.999997	12280	3	-4.1685	0.0087356	0.029236	0.813656	742	2	-4.1685
MAP1LC3B2	9	0.68431	0.88915	0.999997	17617	3	-5.3169	0.008743	0.030978	0.813656	743	4	-5.3169
SLIRP	9	0.098078	0.31019	0.984201	6230	4	-5.122	0.0087506	0.030994	0.813656	744	4	-5.122
C1orf146	9	0.20666	0.4965	0.999997	9690	4	-3.9585	0.0087518	0.030997	0.813656	745	3	-3.9585
LPIN1	8	0.47984	0.75564	0.999997	15125	3	-4.4524	0.0087557	0.029295	0.813656	746	3	-4.4524
POP7	9	0.63785	0.86506	0.999997	17143	4	-5.6548	0.0087771	0.031073	0.813656	747	2	-5.6548
PHF14	9	0.10845	0.33002	0.984525	6644	5	-5.3974	0.0087898	0.03111	0.813656	748	2	-5.3974
RAPGEF6	9	0.80041	0.93708	0.999997	18722	3	-5.317	0.0087986	0.031129	0.813656	749	3	-5.317
TNP2	7	0.12211	0.32874	0.984525	7184	5	-6.6379	0.0088054	0.028509	0.813656	750	1	-6.6379
ALG12	8	0.65241	0.86794	0.999997	17322	3	-1.9596	0.0088195	0.029486	0.813656	751	4	-1.9596
RNASEH2A	9	0.68957	0.89182	0.999997	17672	2	-2.3266	0.0088258	0.031202	0.813656	752	3	-2.3266
MBOAT1	10	0.72994	0.91646	0.999997	18100	2	-5.3549	0.0088281	0.033075	0.822046	753	2	-5.3549
ENTPD4	7	0.47057	0.73982	0.999997	14977	4	-4.9636	0.0088477	0.028624	0.813656	754	2	-4.9636
XYLT2	10	0.72815	0.91576	0.999997	18077	3	-0.12025	0.0088609	0.033181	0.822046	755	5	-0.12025
SEMA6D	8	0.21354	0.49043	0.999997	9856	4	-2.1248	0.0088699	0.029627	0.813656	756	4	-2.1248
CPXCR1	9	0.36856	0.6785	0.999997	13296	3	-4.3526	0.008898	0.031415	0.813656	757	3	-4.3526
ADM	8	0.032975	0.1354	0.884439	3072	4	-2.6007	0.0088982	0.029707	0.813656	758	4	-2.6007
AC005008	7	0.9115	0.96082	0.999997	19613	2	1.0526	0.0089118	0.028821	0.813656	759	4	1.0526
TRUB1	9	0.40715	0.71329	0.999997	13978	4	-5.3169	0.0089321	0.031512	0.813656	760	3	-5.3169
ZNF835	9	0.1966	0.48085	0.999997	9393	3	-5.368	0.0089553	0.031588	0.813656	761	2	-5.368
FARS2	10	0.55646	0.83257	0.999997	16140	5	-2.9037	0.0089653	0.033544	0.822046	762	4	-2.9037
BBC3	9	0.77438	0.929	0.999997	18528	3	-0.17741	0.008969	0.031623	0.813656	763	3	-0.17741
TMEM200C	10	0.89471	0.97193	0.999997	19477	2	-0.039129	0.0089698	0.033558	0.822046	764	5	-0.039129
OR5AU1	8	0.69513	0.88476	0.999997	17733	2	-4.1307	0.0089725	0.029916	0.813656	765	3	-4.1307
PCDH12	7	0.98397	0.98623	0.999997	20152	1	0.98013	0.0089805	0.029014	0.813656	766	4	0.98013
RP11-867G23	10	0.013455	0.070314	0.780112	1725	3	-1.4201	0.0089972	0.033654	0.822046	767	5	-1.4201
ZNF778	10	0.17529	0.46621	0.999997	8822	4	-5.2497	0.0090123	0.03372	0.822046	768	3	-5.2497
DDC	10	0.51447	0.8049	0.999997	15581	2	-0.25006	0.0090344	0.033796	0.822046	769	5	-0.25006
ABHD1	7	0.89491	0.95367	0.999997	19481	2	-5.1413	0.0090356	0.029187	0.813656	770	3	-5.1413
FABP5	8	0.75869	0.91071	0.999997	18406	2	-4.759	0.0090513	0.030141	0.813656	771	2	-4.759
CCL2	10	0.1154	0.35229	0.990008	6921	3	-0.015451	0.0090877	0.033983	0.822046	772	5	-0.015451
SPAG11A	5	0.10121	0.25814	0.963207	6359	4	-7.3158	0.0090892	0.024923	0.813656	773	1	-7.3158
PLAC8	8	0.30941	0.61	0.999997	12103	5	-5.6673	0.0091148	0.030325	0.813656	774	3	-5.6673
XRCC1	7	0.4062	0.68202	0.999997	13943	2	-0.34764	0.0091165	0.02944	0.813656	775	3	-0.34764
KLK7	9	0.94253	0.9814	0.999997	19838	2	0.021382	0.0091223	0.032039	0.820781	776	4	0.021382
RP11-849F2	7	0.99059	0.99065	0.999997	20217	1	-3.8025	0.0091464	0.029523	0.813656	777	1	-3.8025
LEUTX	7	0.55361	0.79356	0.999997	16103	2	-5.1804	0.009152	0.029541	0.813656	778	2	-5.1804
FZD6	10	0.61132	0.86691	0.999997	16857	5	-2.9702	0.009168	0.034222	0.823679	779	4	-2.9702
KCNE1L	7	0.66826	0.85537	0.999997	17474	3	-6.0822	0.0092032	0.029683	0.813656	780	2	-6.0822
RBMX2	7	0.99151	0.99145	0.999997	20233	1	-5.132	0.0092032	0.029683	0.813656	781	2	-5.132
UTP20	8	0.93659	0.9749	0.999997	19791	2	-3.5625	0.0092124	0.030601	0.813656	782	3	-3.5625
SLITRK2	9	0.15337	0.41048	0.999997	8159	3	0.09551	0.0092237	0.032307	0.822046	783	2	0.09551
ZNF639	9	0.15134	0.40705	0.999997	8098	4	-4.2472	0.0092397	0.03235	0.822046	784	1	-4.2472
WNK1	9	0.034841	0.14308	0.887756	3207	4	-4.9646	0.0092673	0.032425	0.822046	785	3	-4.9646
ABCG2	9	0.14028	0.38781	0.999997	7749	5	-5.4645	0.0092779	0.032455	0.822046	786	3	-5.4645
LIN7B	7	0.40357	0.67959	0.999997	13915	2	0.92774	0.0093026	0.029976	0.813656	787	4	0.92774
TERF2IP	10	0.73618	0.91892	0.999997	18176	3	-4.1146	0.009315	0.034706	0.827646	788	2	-4.1146
DAAM1	10	0.54047	0.82213	0.999997	15941	4	-2.5402	0.0093289	0.034758	0.827646	789	4	-2.5402
IL13	9	0.63928	0.86584	0.999997	17160	3	0.46793	0.0093403	0.032614	0.822046	790	4	0.46793
CDK5R1	8	0.31784	0.61984	0.999997	12263	4	-2.7267	0.0093666	0.031051	0.813656	791	4	-2.7267
NPLOC4	9	0.49799	0.79027	0.999997	15387	2	-5.5563	0.0093724	0.032705	0.822046	792	2	-5.5563
UBA5	10	0.99941	0.99943	0.999997	20366	0	-1.6989	0.0093834	0.034955	0.827646	793	3	-1.6989
GABRR1	9	0.22102	0.51813	0.999997	10055	5	-6.0116	0.0093858	0.032733	0.822046	794	2	-6.0116
PACRGL	8	0.1308	0.36608	0.995301	7457	6	-6.3631	0.0093876	0.03111	0.813656	795	2	-6.3631
RERGL	10	0.080902	0.27661	0.968486	5555	5	-5.1041	0.0094231	0.035097	0.827646	796	1	-5.1041
GATM	8	0.072769	0.23902	0.953603	5180	4	-5.0264	0.0094513	0.031299	0.813656	797	2	-5.0264
GREM2	7	0.4398	0.71272	0.999997	14502	4	-5.2705	0.0094579	0.03045	0.813656	798	3	-5.2705
KCNS3	8	0.38464	0.68663	0.999997	13589	3	-5.3756	0.0094654	0.031341	0.813656	799	3	-5.3756
CASP2	10	0.16258	0.44429	0.999997	8472	7	-6.1707	0.0094772	0.035289	0.827646	800	1	-6.1707
GRK6	9	0.016989	0.08269	0.804595	2017	5	-6.5948	0.0094831	0.032977	0.822046	801	3	-6.5948
GNAT2	10	0.17753	0.46938	0.999997	8873	3	-2.1984	0.0094947	0.035348	0.827646	802	4	-2.1984
CCL14	5	0.40694	0.6371	0.999997	13967	2	-3.9685	0.0094953	0.025916	0.813656	803	2	-3.9685
C11orf44	10	0.21016	0.51341	0.999997	9778	6	-6.1338	0.0094995	0.035359	0.827646	804	2	-6.1338
OAZ3	8	0.1234	0.35107	0.988532	7216	3	-1.7373	0.0095175	0.031493	0.813656	805	3	-1.7373
ZNF816	4	0.25801	0.46373	0.999997	11020	2	-3.783	0.0095327	0.025173	0.813656	806	1	-3.783
MGEA5	10	0.93519	0.98353	0.999997	19777	3	-0.30029	0.0095412	0.035498	0.827646	807	5	-0.30029
TNFSF11	9	0.46149	0.76039	0.999997	14839	3	-5.2365	0.0095561	0.033179	0.822046	808	1	-5.2365
SCRN1	6	0.97265	0.97532	0.999997	20071	1	1.0337	0.0095668	0.02867	0.813656	809	3	1.0337
OR4X1	10	0.86366	0.96396	0.999997	19238	2	0.13313	0.0095849	0.035646	0.827646	810	5	0.13313
TMEM54	8	0.22677	0.50781	0.999997	10213	5	-5.8431	0.0095958	0.031708	0.813656	811	2	-5.8431
RNF138	10	0.48236	0.78305	0.999997	15165	5	-5.0998	0.0095983	0.03569	0.827646	812	2	-5.0998
C14orf23	8	0.010554	0.051796	0.746444	1433	2	0.92509	0.0096	0.031721	0.813656	813	4	0.92509
KCNH8	9	0.44807	0.74888	0.999997	14622	4	-5.9581	0.0096152	0.033333	0.822046	814	3	-5.9581
ESYT1	6	0.13149	0.33534	0.984943	7484	2	-5.5813	0.0096317	0.02883	0.813656	815	1	-5.5813
AL160274	7	0.66111	0.85148	0.999997	17394	3	-1.2864	0.0096469	0.031027	0.813656	816	2	-1.2864
PFKFB4	9	0.25348	0.5649	0.999997	10937	4	-1.8682	0.0096535	0.033447	0.822046	817	2	-1.8682
SLFN14	9	0.81173	0.94069	0.999997	18822	3	-4.4547	0.0096823	0.033521	0.822046	818	4	-4.4547
PCMT1	9	0.80559	0.93875	0.999997	18769	2	-3.6012	0.0097022	0.033577	0.822046	819	3	-3.6012
FAM25G	9	0.47161	0.76879	0.999997	14988	3	-4.7271	0.0097505	0.033713	0.822046	820	2	-4.7271
SLC30A7	7	0.10879	0.30395	0.984201	6658	5	-6.0377	0.0097523	0.03134	0.813656	821	1	-6.0377
TSLP	9	0.14994	0.4046	0.999997	8048	2	-4.5428	0.0097698	0.03377	0.822046	822	4	-4.5428
TMEM63C	8	0.75433	0.90887	0.999997	18354	3	-0.89706	0.0097705	0.032203	0.822046	823	4	-0.89706
RP11-613M10	9	0.72672	0.91077	0.999997	18059	1	-0.57764	0.0097753	0.033783	0.822046	824	4	-0.57764
RP11-1021N1	8	0.99453	0.99471	0.999997	20266	1	0.37559	0.009788	0.03226	0.822046	825	4	0.37559
ARL16	9	0.58793	0.83896	0.999997	16553	3	-3.8783	0.0097995	0.033847	0.822046	826	1	-3.8783
APEX2	9	0.86125	0.95709	0.999997	19226	2	-0.87833	0.0098162	0.033894	0.822046	827	3	-0.87833
UBL4B	9	0.95181	0.98368	0.999997	19906	2	-0.84158	0.0098481	0.033983	0.822046	828	3	-0.84158
PRSS16	10	0.62826	0.87609	0.999997	17041	3	-5.0007	0.0098794	0.036638	0.829447	829	3	-5.0007
RAPGEF4	10	0.31379	0.63975	0.999997	12185	6	-6.0925	0.0098827	0.036648	0.829447	830	2	-6.0925
CD3G	10	0.45755	0.76585	0.999997	14757	1	-1.8545	0.009923	0.036786	0.829625	831	5	-1.8545
ZNF668	10	0.25519	0.57075	0.999997	10963	3	0.50235	0.0099246	0.03679	0.829625	832	5	0.50235
GPR132	8	0.82146	0.93769	0.999997	18892	1	0.68066	0.0099334	0.032658	0.822046	833	4	0.68066
NGF	9	0.21972	0.51617	0.999997	10023	4	-5.3974	0.0099421	0.034253	0.823679	834	2	-5.3974
SLFN12	10	0.19939	0.49909	0.999997	9491	5	-5.7759	0.009958	0.0369	0.829625	835	2	-5.7759
WBP11	9	0.76035	0.92477	0.999997	18419	3	-3.565	0.009971	0.034334	0.824657	836	4	-3.565
FABP4	5	0.078288	0.21263	0.947711	5443	3	-5.1279	0.0099823	0.027061	0.813656	837	1	-5.1279
AMOTL1	10	0.5134	0.80419	0.999997	15572	4	-4.7766	0.010024	0.037122	0.830094	838	4	-4.7766
TRGV8	8	0.84683	0.94895	0.999997	19102	2	-1.3806	0.010029	0.032927	0.822046	839	3	-1.3806
POLR2K	4	0.99879	0.99879	0.999997	20347	0	1.2254	0.010033	0.026444	0.813656	840	3	1.2254
QARS	8	0.88018	0.95861	0.999997	19355	2	-5.0817	0.01004	0.032959	0.822046	841	3	-5.0817
SYCP3	9	0.016873	0.082208	0.803254	2010	4	-5.393	0.010057	0.034568	0.827646	842	2	-5.393
MLH1	9	0.04659	0.17854	0.918658	3900	5	-5.4754	0.010068	0.034595	0.827646	843	4	-5.4754
PGK2	7	0.59151	0.81389	0.999997	16605	2	0.90309	0.010069	0.032284	0.822046	844	4	0.90309
TSKS	10	0.55933	0.83445	0.999997	16177	4	-2.9337	0.010091	0.037315	0.830716	845	4	-2.9337
POMGNT2	7	0.79864	0.9207	0.999997	18705	2	1.056	0.010136	0.032493	0.822046	846	4	1.056
STON1-GTF2A1L	10	0.79332	0.94176	0.999997	18668	3	-0.65816	0.010144	0.037485	0.831247	847	4	-0.65816
MAP4K1	8	0.74301	0.90417	0.999997	18241	2	-1.4223	0.010167	0.033339	0.822046	848	3	-1.4223
OTOA	10	0.030102	0.1327	0.883351	2890	3	-3.8821	0.01018	0.037607	0.832171	849	2	-3.8821
FAM161A	9	0.40891	0.71484	0.999997	14016	5	-5.6928	0.01018	0.034875	0.827646	850	3	-5.6928
RBBP9	8	0.18063	0.44526	0.999997	8968	4	-5.4579	0.010187	0.033393	0.822046	851	3	-5.4579
PRX	8	0.44881	0.73352	0.999997	14637	2	0.89427	0.01024	0.033541	0.822046	852	4	0.89427
CDCA7L	9	0.99983	0.99983	0.999997	20375	0	-0.45953	0.010246	0.035075	0.827646	853	4	-0.45953
OR2A7	4	0.029016	0.08912	0.815376	2824	3	-6.7148	0.010247	0.026994	0.813656	854	1	-6.7148
XPNPEP3	9	0.69685	0.89556	0.999997	17752	4	-5.3427	0.010262	0.035114	0.827646	855	1	-5.3427
GORAB	10	0.52631	0.81281	0.999997	15753	3	-2.0885	0.010275	0.037927	0.832171	856	4	-2.0885
MYADML2	8	0.82385	0.93876	0.999997	18922	3	0.38448	0.010275	0.033647	0.822046	857	3	0.38448
ATXN7L3	9	0.60401	0.84737	0.999997	16765	3	0.61749	0.010291	0.0352	0.827646	858	4	0.61749
FAM49A	8	0.48027	0.75593	0.999997	15129	3	-2.6623	0.010308	0.033739	0.822046	859	3	-2.6623
MLLT4	9	0.5009	0.79239	0.999997	15430	4	-5.6626	0.010335	0.03532	0.827646	860	2	-5.6626
CCDC40	9	0.25819	0.57003	0.999997	11030	4	-5.2087	0.010373	0.035425	0.827646	861	2	-5.2087
ZBTB37	8	0.14822	0.39872	0.999997	7996	2	-2.0421	0.010381	0.033932	0.822046	862	4	-2.0421
TNFAIP8L1	7	0.64952	0.84514	0.999997	17294	2	0.8546	0.010392	0.033256	0.822046	863	4	0.8546
TREML4	8	0.33129	0.63522	0.999997	12543	1	-0.89096	0.010393	0.033956	0.822046	864	4	-0.89096
ZNF467	10	0.9165	0.97791	0.999997	19650	3	-4.1537	0.010417	0.038393	0.832171	865	4	-4.1537
TRMT13	10	0.39763	0.72294	0.999997	13807	5	-5.7568	0.010423	0.038413	0.832171	866	3	-5.7568
AC006967	7	0.045936	0.16453	0.909462	3870	2	-2.1118	0.010426	0.03335	0.822046	867	2	-2.1118
SLTM	8	0.49282	0.76476	0.999997	15318	4	-5.2831	0.010438	0.034085	0.82255	868	2	-5.2831
GK5	9	0.6978	0.89605	0.999997	17760	3	-1.1084	0.010496	0.035766	0.827646	869	3	-1.1084
RASGRP4	9	0.73273	0.91379	0.999997	18133	2	-0.58921	0.010508	0.035794	0.827646	870	4	-0.58921
DLX3	7	0.43163	0.70537	0.999997	14380	4	-5.7433	0.010509	0.033574	0.822046	871	2	-5.7433
NICN1	9	0.0081682	0.043757	0.722071	1200	6	-6.1376	0.010578	0.035995	0.827646	872	3	-6.1376
NEK3	9	0.43513	0.73778	0.999997	14424	5	-6.0046	0.010589	0.036017	0.827646	873	2	-6.0046
SLC25A36	10	0.65951	0.88844	0.999997	17372	3	0.64336	0.010589	0.038954	0.833649	874	5	0.64336
FAM160A1	5	0.94601	0.95084	0.999997	19873	1	1.5299	0.010591	0.02852	0.813656	875	3	1.5299
SPATC1L	7	0.62777	0.83336	0.999997	17037	2	-4.4183	0.0106	0.033853	0.822046	876	3	-4.4183
NLGN4Y	9	0.38102	0.68988	0.999997	13527	4	-5.1251	0.010601	0.036048	0.827646	877	3	-5.1251
MRPL19	9	0.90077	0.97127	0.999997	19525	1	-0.54767	0.010606	0.036058	0.827646	878	4	-0.54767
SLC25A42	10	0.10124	0.32212	0.984525	6360	2	0.16942	0.010615	0.039037	0.833649	879	5	0.16942
TMEM232	7	0.64321	0.8417	0.999997	17217	1	0.0048176	0.010624	0.033932	0.822046	880	3	0.0048176
RFPL3	9	0.00087516	0.0060728	0.465812	258	6	-6.7132	0.010645	0.036164	0.827646	881	3	-6.7132
ZNF217	10	0.070347	0.25199	0.961695	5080	4	-0.24273	0.010646	0.039139	0.833649	882	5	-0.24273
WDR16	7	0.018868	0.079092	0.792411	2160	6	-6.2363	0.010661	0.034035	0.822328	883	1	-6.2363
AP005482	9	0.12246	0.3559	0.990892	7191	2	-0.29946	0.010669	0.036225	0.827646	884	4	-0.29946
SORCS3	10	0.43076	0.74686	0.999997	14366	4	-2.4701	0.010681	0.039246	0.833649	885	5	-2.4701
B9D2	9	0.61857	0.85502	0.999997	16927	3	-0.47653	0.010682	0.036266	0.827646	886	4	-0.47653
PCDP1	9	0.073359	0.25229	0.961695	5224	1	-0.7821	0.010747	0.036446	0.829293	887	3	-0.7821
ASL	9	0.17032	0.43896	0.999997	8680	3	-1.5911	0.010756	0.036467	0.829293	888	4	-1.5911
ARNT	9	0.047335	0.18074	0.918658	3944	5	-5.2317	0.010794	0.036555	0.829387	889	4	-5.2317
PARVB	10	0.32281	0.64989	0.999997	12358	3	-0.45271	0.010824	0.039729	0.833649	890	5	-0.45271
BTAF1	10	0.63569	0.87904	0.999997	17124	3	-2.7268	0.010832	0.039757	0.833649	891	3	-2.7268
TOPORS	10	0.16873	0.45571	0.999997	8642	6	-5.4301	0.010845	0.039801	0.833649	892	3	-5.4301
TRIM44	9	0.3641	0.67435	0.999997	13201	3	0.62522	0.010853	0.036714	0.829625	893	4	0.62522
P2RY13	8	0.96761	0.98659	0.999997	20025	1	-0.3188	0.010866	0.035315	0.827646	894	2	-0.3188
SULT1C3	8	0.98723	0.99109	0.999997	20177	1	-4.4057	0.010878	0.035352	0.827646	895	3	-4.4057
KLF16	9	0.1432	0.39293	0.999997	7856	5	-5.1075	0.010919	0.036887	0.829625	896	3	-5.1075
UGT2A1	8	0.094338	0.2887	0.975252	6080	5	-5.903	0.010922	0.03548	0.827646	897	2	-5.903
MYRIP	6	0.65078	0.83948	0.999997	17308	2	-4.1051	0.01093	0.031703	0.813656	898	2	-4.1051
STARD3	9	0.36634	0.67644	0.999997	13252	5	-5.4809	0.010944	0.036963	0.830094	899	2	-5.4809
RP11-276H1	8	0.79132	0.92442	0.999997	18655	2	0.96947	0.010965	0.035596	0.827646	900	4	0.96947
TRAV9-1	8	0.5188	0.78294	0.999997	15640	4	-5.2116	0.010967	0.0356	0.827646	901	3	-5.2116
SELPLG	9	0.43572	0.73832	0.999997	14436	4	-5.7285	0.010967	0.037029	0.830094	902	3	-5.7285
ING5	8	0.11588	0.33536	0.984943	6933	5	-6.3368	0.010988	0.035654	0.827646	903	2	-6.3368
DDX3Y	7	0.88207	0.94858	0.999997	19366	2	-0.7821	0.011001	0.035014	0.827646	904	2	-0.7821
FSTL4	10	0.80049	0.9446	0.999997	18726	4	-4.3346	0.011017	0.040361	0.833649	905	2	-4.3346
FAM58A	9	0.021858	0.10106	0.844911	2363	5	-6.7091	0.01102	0.037165	0.830094	906	4	-6.7091
SPZ1	8	0.19341	0.46315	0.999997	9289	5	-6.6276	0.01103	0.035768	0.827646	907	1	-6.6276
SLC6A16	10	0.972	0.99151	0.999997	20065	2	0.16008	0.011039	0.040433	0.833649	908	4	0.16008
C11orf58	8	0.64949	0.86681	0.999997	17293	2	-5.5781	0.011072	0.035881	0.827646	909	3	-5.5781
ZNF784	10	0.49441	0.79131	0.999997	15328	5	-5.4583	0.011098	0.040594	0.833649	910	3	-5.4583
PRKD3	10	0.28114	0.60196	0.999997	11532	5	-5.7871	0.011101	0.040603	0.833649	911	3	-5.7871
PANX2	9	0.79433	0.93514	0.999997	18677	2	-4.8152	0.011122	0.037462	0.831247	912	4	-4.8152
PIK3R3	8	0.10321	0.30831	0.984201	6431	3	-5.3379	0.011134	0.036057	0.827646	913	2	-5.3379
ADAD1	10	0.69838	0.90386	0.999997	17771	4	-5.3652	0.011152	0.040726	0.833649	914	2	-5.3652
ALKBH1	10	0.20204	0.5027	0.999997	9553	5	-5.2615	0.011179	0.040796	0.833649	915	2	-5.2615
FOXRED2	8	0.76679	0.91408	0.999997	18466	2	-4.3839	0.011181	0.036193	0.827646	916	1	-4.3839
GABRG3	10	0.031893	0.1389	0.885184	3010	4	-3.8695	0.011206	0.040872	0.833649	917	3	-3.8695
IL21R	9	0.33303	0.6449	0.999997	12578	3	0.22433	0.01123	0.037769	0.832171	918	4	0.22433
RAB3IP	9	0.55503	0.82146	0.999997	16117	4	-5.4779	0.011248	0.037812	0.832171	919	4	-5.4779
TRAF6	10	0.90459	0.97457	0.999997	19549	3	-4.7534	0.011301	0.041117	0.836407	920	3	-4.7534
CNPY2	9	0.4732	0.77011	0.999997	15005	3	-1.4681	0.011351	0.038082	0.832171	921	3	-1.4681
MAP2K7	9	0.99433	0.99584	0.999997	20263	1	0.18172	0.011372	0.038143	0.832171	922	3	0.18172
IQCF2	9	0.4078	0.71389	0.999997	13981	4	-5.8543	0.01138	0.038162	0.832171	923	3	-5.8543
ZFP2	10	0.018513	0.090205	0.817015	2129	5	-6.3602	0.011403	0.041377	0.839271	924	3	-6.3602
GPSM1	9	0.19893	0.48452	0.999997	9467	5	-5.808	0.011415	0.038262	0.832171	925	3	-5.808
TCEANC	8	0.17826	0.44191	0.999997	8904	1	-4.2985	0.011423	0.03688	0.829625	926	3	-4.2985
SPN	10	0.28478	0.60622	0.999997	11610	3	-2.5363	0.011431	0.041446	0.839271	927	4	-2.5363
ARID4A	10	0.22782	0.53642	0.999997	10238	3	-1.3119	0.011447	0.041486	0.839271	928	4	-1.3119
C19orf55	10	0.34015	0.66893	0.999997	12730	4	-5.2215	0.011474	0.04155	0.839295	929	4	-5.2215
IGHV3-43	7	0.0015871	0.0089753	0.528647	375	2	0.60637	0.011495	0.036479	0.829293	930	4	0.60637
ICAM4	8	0.3585	0.66545	0.999997	13091	5	-5.2295	0.011523	0.037152	0.830094	931	3	-5.2295
HMCN2	7	0.20507	0.46962	0.999997	9648	5	-6.1859	0.01153	0.036564	0.829387	932	2	-6.1859
PRPH2	10	0.27228	0.59138	0.999997	11330	6	-5.5053	0.011584	0.041828	0.840389	933	3	-5.5053
TFAP2E	10	0.60177	0.86111	0.999997	16729	4	-4.9144	0.011584	0.041828	0.840389	934	2	-4.9144
GNA13	9	0.11663	0.34514	0.985935	6969	4	-4.3526	0.011599	0.038762	0.833649	935	3	-4.3526
NGLY1	8	0.42316	0.71486	0.999997	14233	3	-3.8884	0.011613	0.037388	0.831247	936	1	-3.8884
TMEM41A	9	0.0067296	0.036917	0.715337	1035	4	-4.9975	0.011623	0.038828	0.833649	937	3	-4.9975
G6PC	9	0.74272	0.91885	0.999997	18239	2	-4.0892	0.011645	0.038889	0.833649	938	3	-4.0892
CRIP3	8	0.25101	0.53888	0.999997	10873	3	-4.9102	0.011656	0.037502	0.831247	939	1	-4.9102
GRPEL2	10	0.14118	0.40376	0.999997	7782	4	-5.8988	0.011676	0.042053	0.843205	940	2	-5.8988
DHRS9	9	0.48254	0.77781	0.999997	15170	3	-0.050341	0.011694	0.039028	0.833649	941	4	-0.050341
C15orf60	10	0.17535	0.46631	0.999997	8826	5	-5.6452	0.011701	0.042111	0.843554	942	3	-5.6452
OR4D2	9	0.15975	0.42127	0.999997	8362	4	-5.1804	0.011713	0.039076	0.833649	943	3	-5.1804
ZNF284	7	0.18161	0.43191	0.999997	8992	4	-6.2724	0.011719	0.037079	0.830094	944	1	-6.2724
GAS2L3	10	0.1245	0.37086	0.997305	7259	5	-3.4634	0.011723	0.042166	0.843814	945	2	-3.4634
TMEM2	9	0.9362	0.97994	0.999997	19788	1	-3.7077	0.011762	0.039225	0.833649	946	4	-3.7077
SYNC	7	0.29787	0.57705	0.999997	11875	3	-5.9581	0.011771	0.037223	0.830465	947	2	-5.9581
GABRA6	7	0.73933	0.89446	0.999997	18211	3	0.98047	0.011784	0.037264	0.830487	948	4	0.98047
CALR3	8	0.46359	0.74418	0.999997	14866	4	-5.3173	0.011829	0.037986	0.832171	949	1	-5.3173
RAP1GAP2	8	0.61364	0.8467	0.999997	16876	3	-2.8371	0.011841	0.038024	0.832171	950	3	-2.8371
EGFLAM	10	0.073368	0.25903	0.963207	5227	3	-2.7506	0.011854	0.042502	0.845827	951	2	-2.7506
ACOT11	9	0.99759	0.99763	0.999997	20323	1	0.20956	0.011866	0.039515	0.833649	952	4	0.20956
TNFAIP8L3	8	0.75869	0.91071	0.999997	18404	2	-3.1813	0.011866	0.038084	0.832171	953	3	-3.1813
CRIP2	8	0.2693	0.56166	0.999997	11257	3	-2.7876	0.011895	0.038171	0.832171	954	2	-2.7876
SCGB3A2	8	0.17626	0.43909	0.999997	8841	4	-6.0287	0.011915	0.03823	0.832171	955	2	-6.0287
SLC9A7	9	0.93353	0.97934	0.999997	19768	2	-0.7821	0.011924	0.039677	0.833649	956	4	-0.7821
GNLY	9	0.26769	0.57991	0.999997	11237	3	0.10342	0.011951	0.039744	0.833649	957	3	0.10342
CDON	10	0.67792	0.89572	0.999997	17561	4	-4.846	0.011977	0.042822	0.847493	958	3	-4.846
TTLL4	9	0.28917	0.60172	0.999997	11688	4	-5.8897	0.011987	0.039854	0.833649	959	2	-5.8897
FAM127A	8	0.84806	0.94951	0.999997	19116	2	0.21242	0.012002	0.038471	0.832171	960	2	0.21242
RFXANK	8	0.039088	0.1535	0.897047	3455	2	-4.0169	0.012005	0.038483	0.832171	961	3	-4.0169
ELP3	10	0.42364	0.74185	0.999997	14254	5	-4.7201	0.012016	0.042932	0.847493	962	2	-4.7201
LPP	9	0.14994	0.4046	0.999997	8046	5	-5.7571	0.012036	0.039993	0.833649	963	3	-5.7571
CSH2	7	0.16939	0.41163	0.999997	8662	3	-4.5867	0.012036	0.037995	0.832171	964	2	-4.5867
OR5I1	9	0.85003	0.9533	0.999997	19134	3	-4.1915	0.012064	0.04006	0.833649	965	4	-4.1915
TSPY3	8	4.4418e-05	0.00031875	0.127451	54	4	-2.9139	0.012069	0.038655	0.833649	966	2	-2.9139
UBE2U	9	0.33303	0.6449	0.999997	12580	2	-3.0243	0.012072	0.040085	0.833649	967	3	-3.0243
RPS12	9	0.76295	0.92556	0.999997	18442	2	-5.621	0.012084	0.040114	0.833649	968	3	-5.621
ALG11	8	0.37164	0.67693	0.999997	13345	3	-4.339	0.012088	0.038719	0.833649	969	1	-4.339
NBR1	9	0.7212	0.90796	0.999997	17999	4	-4.788	0.012089	0.040126	0.833649	970	2	-4.788
CIPC	7	0.98096	0.98472	0.999997	20129	1	-0.53795	0.012094	0.038171	0.832171	971	3	-0.53795
TUBB	7	0.10936	0.30505	0.984201	6680	4	-6.2519	0.012097	0.038177	0.832171	972	1	-6.2519
DBX1	7	0.41043	0.68592	0.999997	14039	2	0.69801	0.01213	0.038274	0.832171	973	4	0.69801
REN	8	0.072105	0.23739	0.953603	5155	3	-3.1316	0.012131	0.038842	0.833649	974	3	-3.1316
TRIM46	9	0.55149	0.81953	0.999997	16074	1	-3.8751	0.012157	0.040311	0.833649	975	1	-3.8751
CSTL1	9	0.67803	0.8859	0.999997	17564	1	-3.978	0.012168	0.040334	0.833649	976	2	-3.978
RALYL	8	0.068614	0.22888	0.952746	4996	4	-5.963	0.012217	0.039065	0.833649	977	1	-5.963
TRGJP1	2	0.98778	0.98783	0.999997	20182	0	1.3592	0.012218	0.023	0.811094	978	2	1.3592
WDR5B	9	0.033797	0.13985	0.885184	3128	5	-6.0995	0.012272	0.040611	0.833649	979	3	-6.0995
IFT172	10	0.31936	0.646	0.999997	12294	6	-5.8082	0.012286	0.043634	0.850613	980	1	-5.8082
ZNF177	3	0.71365	0.7558	0.999997	17932	1	2.0547	0.012303	0.025171	0.813656	981	2	2.0547
LRRC37A3	7	0.99631	0.99626	0.999997	20302	0	-3.6973	0.012334	0.038863	0.833649	982	3	-3.6973
SEMA3D	9	0.58643	0.83818	0.999997	16529	4	-3.5559	0.012366	0.040881	0.833649	983	3	-3.5559
SEMA4C	9	0.204	0.49237	0.999997	9620	5	-5.5965	0.0124	0.040971	0.834646	984	2	-5.5965
CWC15	8	0.382	0.68468	0.999997	13538	4	-5.3662	0.012412	0.03961	0.833649	985	1	-5.3662
TOPAZ1	6	0.059006	0.18538	0.92081	4519	3	-2.7415	0.012421	0.035006	0.827646	986	3	-2.7415
PSMD9	6	0.98247	0.98271	0.999997	20138	1	-3.0994	0.012436	0.035041	0.827646	987	2	-3.0994
KLK11	7	0.3693	0.64731	0.999997	13303	2	-1.201	0.012448	0.039214	0.833649	988	2	-1.201
PRH1	10	0.51988	0.80853	0.999997	15661	3	-1.839	0.012452	0.044047	0.850613	989	4	-1.839
MYCBP	8	0.56695	0.81578	0.999997	16272	2	0.22853	0.012472	0.03977	0.833649	990	4	0.22853
RWDD1	8	0.65241	0.86794	0.999997	17325	2	-4.6627	0.012476	0.039781	0.833649	991	1	-4.6627
POP1	8	0.67357	0.8762	0.999997	17518	3	-5.0806	0.01249	0.039824	0.833649	992	2	-5.0806
GSX2	10	0.56849	0.84031	0.999997	16298	3	-4.9032	0.012501	0.044171	0.850613	993	2	-4.9032
IGLV1-36	10	0.49163	0.78941	0.999997	15290	4	-4.0053	0.012508	0.044183	0.850613	994	4	-4.0053
OR9Q2	10	0.0023198	0.015223	0.592792	500	6	-6.6172	0.012508	0.044184	0.850613	995	2	-6.6172
GPATCH8	8	0.59187	0.83232	0.999997	16607	4	-5.389	0.012543	0.039977	0.833649	996	2	-5.389
AC106876	10	0.27464	0.59426	0.999997	11377	3	-0.26378	0.012551	0.044286	0.850613	997	4	-0.26378
DNAJC3	8	0.51784	0.78229	0.999997	15632	3	-5.6711	0.012561	0.040033	0.833649	998	2	-5.6711
PRMT8	9	0.61656	0.85393	0.999997	16905	4	0.41383	0.012574	0.041452	0.839271	999	4	0.41383
SPANXN1	2	0.98742	0.98747	0.999997	20180	0	1.742	0.01258	0.023653	0.81274	1000	2	1.742
CDCA8	7	0.070896	0.22912	0.952746	5105	3	-5.393	0.012638	0.039766	0.833649	1001	2	-5.393
ZADH2	10	0.033872	0.14571	0.888638	3137	6	-6.6074	0.012673	0.044585	0.8551	1002	2	-6.6074
PLCB3	9	0.44807	0.74888	0.999997	14625	4	-0.7821	0.012692	0.041771	0.840389	1003	4	-0.7821
PTGES3	8	0.42859	0.71884	0.999997	14340	4	-5.6752	0.012712	0.040466	0.833649	1004	2	-5.6752
COL8A2	9	0.58793	0.83896	0.999997	16554	2	-5.0168	0.012715	0.04183	0.840389	1005	1	-5.0168
SECISBP2	8	0.5264	0.78814	0.999997	15754	3	-0.0087931	0.012747	0.040553	0.833649	1006	4	-0.0087931
LRRFIP2	8	0.017987	0.081373	0.799931	2104	2	0.74366	0.012751	0.040564	0.833649	1007	4	0.74366
TSPAN16	8	0.036618	0.14679	0.888638	3315	4	-6.0667	0.012751	0.040565	0.833649	1008	2	-6.0667
GLI3	9	0.39637	0.70377	0.999997	13779	3	-1.1571	0.012764	0.041956	0.842096	1009	2	-1.1571
OR13C3	7	0.68257	0.86304	0.999997	17607	3	-4.6048	0.012767	0.040136	0.833649	1010	2	-4.6048
RP11-886H22	8	0.75244	0.90805	0.999997	18339	3	0.44968	0.012806	0.040732	0.833649	1011	4	0.44968
KCNE1	10	0.089877	0.29703	0.981722	5928	3	-0.28929	0.012811	0.044933	0.857393	1012	4	-0.28929
OR2T7	10	0.034757	0.1488	0.888638	3199	6	-5.8478	0.012825	0.04496	0.857393	1013	1	-5.8478
TRAFD1	8	0.18574	0.45247	0.999997	9092	5	-5.6129	0.012834	0.040811	0.833649	1014	3	-5.6129
TMEM194A	8	0.96802	0.98666	0.999997	20030	1	-0.0082585	0.012838	0.040823	0.833649	1015	4	-0.0082585
OR1Q1	10	0.26371	0.58104	0.999997	11133	4	-5.2226	0.012928	0.04523	0.857983	1016	3	-5.2226
PMS2	9	0.21465	0.50865	0.999997	9879	3	0.70655	0.012931	0.042388	0.845827	1017	4	0.70655
WNT5A	6	0.9887	0.98878	0.999997	20195	0	-0.24392	0.012938	0.036168	0.827646	1018	2	-0.24392
BEST2	9	0.080578	0.27102	0.96558	5541	4	-4.5428	0.012948	0.04243	0.845827	1019	3	-4.5428
ZNF777	8	0.5714	0.81873	0.999997	16338	3	0.42032	0.012952	0.041139	0.836407	1020	4	0.42032
ETV6	9	0.27959	0.59205	0.999997	11488	5	-5.1852	0.012958	0.042458	0.845827	1021	3	-5.1852
NR4A3	8	0.66836	0.87416	0.999997	17476	2	0.48178	0.012975	0.041206	0.836925	1022	4	0.48178
KRTAP10-4	9	0.10523	0.32393	0.984525	6513	4	-4.788	0.012981	0.042518	0.845827	1023	3	-4.788
ZNF468	9	0.54232	0.81462	0.999997	15971	4	-6.1011	0.013007	0.042582	0.845827	1024	1	-6.1011
OSBPL7	9	0.20754	0.49783	0.999997	9713	5	-6.0191	0.013027	0.04264	0.845827	1025	3	-6.0191
HOOK2	10	0.95244	0.98782	0.999997	19909	2	-4.3214	0.013033	0.045469	0.860114	1026	3	-4.3214
WDR61	10	0.37474	0.70544	0.999997	13410	6	-5.8387	0.013072	0.04557	0.860394	1027	2	-5.8387
DLST	9	0.032114	0.13455	0.884439	3020	6	-5.7652	0.013099	0.042831	0.847493	1028	2	-5.7652
TTC6	8	0.98529	0.99041	0.999997	20162	1	-4.3493	0.01311	0.04157	0.839295	1029	2	-4.3493
TMTC1	9	0.13039	0.37022	0.997185	7438	5	-5.9501	0.013113	0.042874	0.847493	1030	3	-5.9501
APOF	9	0.98928	0.99439	0.999997	20208	1	0.67731	0.01312	0.042896	0.847493	1031	4	0.67731
SOX18	9	0.16672	0.433	0.999997	8586	3	-4.3526	0.01316	0.043007	0.847602	1032	3	-4.3526
SLC25A52	10	0.057551	0.22081	0.95059	4450	4	-2.9078	0.013188	0.045859	0.860394	1033	3	-2.9078
CCR1	9	0.065046	0.23013	0.952746	4829	3	-4.4445	0.013201	0.043104	0.847602	1034	4	-4.4445
KDM1A	9	0.011307	0.05819	0.766628	1496	4	-5.4198	0.013219	0.043152	0.847602	1035	3	-5.4198
LAYN	10	0.020291	0.097001	0.831515	2266	4	-0.72755	0.013233	0.045971	0.860394	1036	3	-0.72755
VTN	4	0.62361	0.76363	0.999997	16991	2	-1.4692	0.013277	0.034167	0.823555	1037	2	-1.4692
AC091150	10	0.77492	0.93447	0.999997	18531	3	-4.6011	0.01329	0.046121	0.860394	1038	4	-4.6011
HIST1H2BM	10	0.19939	0.49909	0.999997	9490	5	-5.593	0.013308	0.04617	0.860394	1039	4	-5.593
DSCAM	9	0.99499	0.99612	0.999997	20277	1	-0.069666	0.013381	0.043576	0.850334	1040	4	-0.069666
ZNF813	10	0.08424	0.28422	0.972123	5703	6	-5.7724	0.013401	0.046407	0.860394	1041	3	-5.7724
CRH	10	0.21243	0.51644	0.999997	9822	5	-5.7593	0.013439	0.046493	0.860394	1042	2	-5.7593
EPSTI1	8	0.77249	0.91651	0.999997	18512	3	-4.974	0.013469	0.042604	0.845827	1043	2	-4.974
GPR25	9	0.85725	0.95576	0.999997	19190	1	-0.32121	0.013492	0.043868	0.850613	1044	3	-0.32121
ZFR2	7	0.66431	0.85321	0.999997	17430	3	-4.4901	0.01357	0.042225	0.844171	1045	2	-4.4901
ACYP1	9	0.22778	0.52803	0.999997	10233	4	-4.5414	0.013575	0.044098	0.850613	1046	3	-4.5414
GLS2	9	0.058273	0.21172	0.94722	4482	2	-3.0865	0.013639	0.044257	0.850613	1047	3	-3.0865
GNG10	8	0.15816	0.41316	0.999997	8329	5	-6.4429	0.01365	0.043092	0.847602	1048	3	-6.4429
FRS3	9	0.79278	0.93467	0.999997	18666	3	-1.053	0.013657	0.044299	0.850613	1049	2	-1.053
PPP3R1	8	0.3231	0.6259	0.999997	12376	5	-5.9505	0.013684	0.043186	0.847602	1050	1	-5.9505
APP	8	0.9997	0.99971	0.999997	20372	0	0.68412	0.013725	0.043301	0.847927	1051	4	0.68412
PAGE5	8	0.8634	0.95463	0.999997	19237	2	0.78501	0.013764	0.043405	0.848408	1052	4	0.78501
AMELY	10	0.055785	0.21632	0.94829	4370	6	-5.7031	0.013768	0.047353	0.862294	1053	2	-5.7031
REPIN1	10	0.3862	0.71454	0.999997	13618	5	-5.8133	0.013819	0.047474	0.862294	1054	2	-5.8133
ANKRD30BL	9	0.38622	0.69465	0.999997	13621	4	-1.5738	0.013822	0.044742	0.856264	1055	4	-1.5738
ACPL2	10	0.13795	0.3975	0.999997	7667	6	-5.485	0.01383	0.047507	0.862294	1056	3	-5.485
OR5AL1	8	0.97301	0.98751	0.999997	20078	1	-5.2149	0.0139	0.043778	0.850613	1057	1	-5.2149
ST6GALNAC5	9	0.54232	0.81462	0.999997	15975	3	-3.565	0.013911	0.044989	0.857393	1058	4	-3.565
TRBV9	10	0.15795	0.43577	0.999997	8322	4	-2.3239	0.013921	0.047741	0.862294	1059	4	-2.3239
RP11-861L17	6	0.96989	0.97363	0.999997	20047	1	-0.0089673	0.013963	0.038448	0.832171	1060	3	-0.0089673
MROH9	9	0.39237	0.70011	0.999997	13706	5	-5.193	0.013971	0.045134	0.857983	1061	2	-5.193
DBF4B	10	0.015248	0.077514	0.788973	1881	4	-2.4861	0.013973	0.047875	0.862579	1062	4	-2.4861
ZNF525	9	0.033319	0.13835	0.885184	3087	1	0.66566	0.01404	0.045301	0.858529	1063	4	0.66566
TSGA13	7	0.78078	0.91547	0.999997	18577	2	-4.7499	0.01406	0.043244	0.84792	1064	1	-4.7499
PLEKHA5	7	0.80973	0.92403	0.999997	18797	2	-4.9855	0.014098	0.043328	0.847927	1065	2	-4.9855
APPBP2	9	0.25454	0.5662	0.999997	10950	3	-2.8002	0.014154	0.045611	0.860394	1066	3	-2.8002
OR2V1	10	0.92663	0.98093	0.999997	19715	2	-4.1247	0.014218	0.048511	0.865588	1067	2	-4.1247
C10orf88	10	0.038406	0.16119	0.903995	3429	8	-5.5999	0.014226	0.048527	0.865588	1068	1	-5.5999
HIST1H1B	9	0.59082	0.84045	0.999997	16602	2	-5.1251	0.014231	0.045803	0.860394	1069	3	-5.1251
B3GAT2	7	0.65244	0.84674	0.999997	17326	1	-4.9398	0.014269	0.043716	0.850613	1070	3	-4.9398
FXYD6	9	0.14117	0.38934	0.999997	7780	2	-0.12603	0.014274	0.045915	0.860394	1071	2	-0.12603
RP11-1396O13	9	0.78633	0.93265	0.999997	18621	3	-4.788	0.014316	0.046021	0.860394	1072	2	-4.788
CORO1A	9	0.19907	0.48472	0.999997	9469	4	-4.8702	0.014345	0.0461	0.860394	1073	3	-4.8702
CALM3	10	0.41847	0.7381	0.999997	14162	5	-5.7595	0.01436	0.048875	0.866803	1074	2	-5.7595
LSG1	8	0.21364	0.49056	0.999997	9864	3	-4.9047	0.014374	0.045125	0.857983	1075	3	-4.9047
WDR88	6	0.79131	0.89797	0.999997	18652	2	-1.3281	0.014387	0.039402	0.833649	1076	3	-1.3281
OR8G5	8	0.44806	0.73296	0.999997	14620	3	-5.366	0.014406	0.045218	0.857983	1077	3	-5.366
PDXK	7	0.15159	0.38159	0.999997	8103	2	0.1937	0.014412	0.044018	0.850613	1078	3	0.1937
TADA2A	10	0.89869	0.97298	0.999997	19506	3	-4.6905	0.014416	0.049012	0.866803	1079	3	-4.6905
IQGAP2	10	0.98554	0.99508	0.999997	20167	1	-1.2019	0.014424	0.04903	0.866803	1080	4	-1.2019
PAWR	7	0.39647	0.67307	0.999997	13789	2	-5.7994	0.014438	0.04407	0.850613	1081	1	-5.7994
SPATA19	9	0.17317	0.44356	0.999997	8762	4	0.6294	0.014439	0.046343	0.860394	1082	4	0.6294
SPEM1	10	0.86019	0.96308	0.999997	19210	3	-4.6021	0.014448	0.049092	0.866803	1083	3	-4.6021
PHF11	7	0.45695	0.72791	0.999997	14754	3	-0.48514	0.014471	0.044132	0.850613	1084	2	-0.48514
GSG1	10	0.35415	0.68409	0.999997	12995	5	-5.0053	0.014475	0.049164	0.866803	1085	4	-5.0053
FBXO6	9	0.38493	0.69347	0.999997	13601	3	-1.4162	0.014476	0.046435	0.860394	1086	3	-1.4162
IGLV3-19	9	0.11969	0.35077	0.988347	7100	4	-0.97305	0.014492	0.046479	0.860394	1087	3	-0.97305
KRTAP4-3	10	0.7208	0.91283	0.999997	17996	4	-2.9757	0.014499	0.049223	0.866803	1088	4	-2.9757
OR2T5	10	0.56849	0.84031	0.999997	16297	3	-4.4015	0.014557	0.049374	0.868033	1089	4	-4.4015
ACTN3	10	0.10562	0.33156	0.984525	6527	6	-6.3676	0.01456	0.049379	0.868033	1090	4	-6.3676
HSD11B2	8	0.075447	0.24526	0.956351	5315	5	-6.0238	0.014568	0.04566	0.860394	1091	2	-6.0238
NT5DC4	10	0.19755	0.4966	0.999997	9427	5	-5.6457	0.014583	0.049443	0.868033	1092	3	-5.6457
SOWAHC	9	0.071614	0.24768	0.958575	5131	4	-4.6127	0.014607	0.046803	0.862294	1093	3	-4.6127
STAC2	10	0.46808	0.77319	0.999997	14944	4	-4.1341	0.014615	0.049518	0.868033	1094	4	-4.1341
CA13	9	0.049464	0.18688	0.923294	4051	4	-6.1161	0.014615	0.04683	0.862294	1095	2	-6.1161
SRSF11	10	0.78609	0.9389	0.999997	18616	4	-4.3951	0.014623	0.049534	0.868033	1096	2	-4.3951
SLC9A8	8	0.50166	0.77096	0.999997	15443	2	0.69732	0.014636	0.045855	0.860394	1097	4	0.69732
GLTPD1	7	0.054721	0.19005	0.927351	4308	4	-5.262	0.014777	0.044762	0.856264	1098	1	-5.262
TPR	8	0.056538	0.19897	0.934876	4406	6	-6.5866	0.01479	0.046279	0.860394	1099	2	-6.5866
FTCDNL1	8	0.36395	0.67115	0.999997	13195	3	-2.0762	0.014828	0.046371	0.860394	1100	4	-2.0762
GOLT1A	8	0.023869	0.10317	0.850002	2500	2	-5.7179	0.014848	0.046421	0.860394	1101	1	-5.7179
ASTL	10	0.57449	0.84405	0.999997	16377	4	-5.9087	0.014853	0.05012	0.872796	1102	4	-5.9087
PCM1	10	0.44946	0.76017	0.999997	14652	2	0.43658	0.01487	0.050165	0.872829	1103	4	0.43658
MAGEB5	9	0.88607	0.96591	0.999997	19416	3	-4.8612	0.014873	0.047531	0.862294	1104	1	-4.8612
KCNK6	8	0.39638	0.69534	0.999997	13784	2	-0.067581	0.014888	0.046529	0.860394	1105	4	-0.067581
RNF182	8	0.13684	0.37811	0.999997	7636	6	-6.7692	0.014891	0.046539	0.860394	1106	1	-6.7692
POC5	9	0.72436	0.90958	0.999997	18027	4	-5.4867	0.014939	0.047703	0.862294	1107	3	-5.4867
OMA1	10	0.23141	0.54093	0.999997	10351	4	-5.5483	0.014953	0.050376	0.875264	1108	3	-5.5483
TNK1	9	0.47344	0.7703	0.999997	15029	4	-0.7579	0.015017	0.047915	0.862579	1109	4	-0.7579
FGF7	9	0.038071	0.15303	0.895758	3405	4	-4.7353	0.015021	0.047926	0.862579	1110	3	-4.7353
C17orf78	8	0.5158	0.78084	0.999997	15599	1	0.74594	0.015033	0.046929	0.862294	1111	4	0.74594
KRTAP19-8	10	0.2023	0.50306	0.999997	9565	4	-5.3964	0.015081	0.05071	0.877846	1112	2	-5.3964
PCSK2	8	0.95164	0.98058	0.999997	19902	2	-2.5348	0.015084	0.047069	0.862294	1113	3	-2.5348
C1orf112	8	0.7689	0.91502	0.999997	18481	3	0.46438	0.015107	0.047127	0.862294	1114	4	0.46438
MRPL34	8	0.26617	0.55785	0.999997	11189	3	0.066532	0.015119	0.047159	0.862294	1115	4	0.066532
CASP10	9	0.98129	0.99304	0.999997	20130	1	-4.8225	0.015128	0.04819	0.865588	1116	3	-4.8225
COMMD7	9	0.52522	0.80551	0.999997	15749	3	-2.0383	0.015209	0.048392	0.865588	1117	4	-2.0383
ST8SIA5	8	0.64041	0.86326	0.999997	17178	2	0.4712	0.015229	0.047456	0.862294	1118	4	0.4712
DEPDC4	9	0.29328	0.60582	0.999997	11782	4	-6.0393	0.015236	0.048471	0.865588	1119	1	-6.0393
ZNF366	9	0.7372	0.9161	0.999997	18186	3	-0.94669	0.015273	0.04856	0.865588	1120	3	-0.94669
ZNF517	8	0.72535	0.897	0.999997	18045	3	-5.565	0.015296	0.047644	0.862294	1121	2	-5.565
RNF103	8	0.36131	0.66853	0.999997	13143	5	-5.2136	0.0153	0.047651	0.862294	1122	1	-5.2136
TPPP	8	0.98723	0.99109	0.999997	20178	1	-4.2999	0.0153	0.047651	0.862294	1123	2	-4.2999
CPLX3	8	0.24154	0.52686	0.999997	10623	3	-3.3098	0.015311	0.047677	0.862294	1124	3	-3.3098
KLHL10	8	0.78617	0.92226	0.999997	18619	2	-4.9277	0.015322	0.04771	0.862294	1125	3	-4.9277
AC027309	7	0.76961	0.91132	0.999997	18483	2	0.42901	0.015343	0.045941	0.860394	1126	2	0.42901
PARP12	8	0.40797	0.70373	0.999997	13988	4	-2.9944	0.015364	0.047824	0.862579	1127	2	-2.9944
DYRK2	10	0.056257	0.21753	0.94829	4393	1	-0.040698	0.015376	0.051462	0.877846	1128	4	-0.040698
TMF1	10	0.013925	0.072241	0.781366	1759	7	-6.55	0.01541	0.051546	0.877846	1129	2	-6.55
LONRF3	7	0.96931	0.98036	0.999997	20043	1	-1.2865	0.015426	0.046111	0.860394	1130	3	-1.2865
GIMAP4	5	0.020162	0.074996	0.786551	2256	2	-3.56	0.015435	0.03979	0.833649	1131	1	-3.56
PDLIM2	10	0.16514	0.44904	0.999997	8550	3	-0.88661	0.01544	0.051622	0.877846	1132	2	-0.88661
MN1	9	0.07718	0.26228	0.963894	5381	4	-2.9437	0.015514	0.049194	0.866803	1133	4	-2.9437
NFIL3	10	0.29871	0.62262	0.999997	11898	5	-5.7987	0.015571	0.051951	0.877846	1134	2	-5.7987
PRKAG2	8	0.20597	0.48027	0.999997	9669	4	-5.7102	0.015621	0.048531	0.865588	1135	2	-5.7102
C1orf143	7	0.11031	0.30674	0.984201	6722	4	-5.5299	0.015661	0.046598	0.860718	1136	3	-5.5299
ZFP41	8	0.33425	0.63851	0.999997	12602	5	-5.9238	0.015666	0.048653	0.865728	1137	1	-5.9238
TRAV21	8	0.37966	0.68294	0.999997	13489	4	-5.2293	0.015666	0.048653	0.865728	1138	3	-5.2293
KCNH5	9	0.13625	0.38062	0.999997	7618	4	-4.8453	0.015672	0.049596	0.868033	1139	2	-4.8453
KHSRP	9	0.85507	0.95501	0.999997	19171	2	-4.263	0.015684	0.049634	0.868033	1140	3	-4.263
WHSC1	9	0.92204	0.97702	0.999997	19686	2	-0.051047	0.015702	0.049676	0.868033	1141	3	-0.051047
ST7	7	0.54594	0.78944	0.999997	16003	3	0.61749	0.015723	0.046713	0.862063	1142	3	0.61749
RHOC	8	0.47407	0.75159	0.999997	15038	1	-0.27836	0.015786	0.048992	0.866803	1143	4	-0.27836
GCSAM	9	0.021513	0.099918	0.844401	2338	4	-0.059859	0.015824	0.049979	0.872434	1144	4	-0.059859
PITPNM2	7	0.36952	0.64753	0.999997	13306	2	-0.1929	0.015836	0.046937	0.862294	1145	3	-0.1929
KCNC3	9	0.57767	0.83353	0.999997	16425	3	0.78715	0.015854	0.050056	0.872434	1146	4	0.78715
LYAR	10	0.5238	0.81115	0.999997	15729	4	-6.141	0.015894	0.05276	0.880188	1147	1	-6.141
DYNC1LI1	7	0.29056	0.56967	0.999997	11716	3	-1.8484	0.015983	0.047246	0.862294	1148	3	-1.8484
B4GALNT3	8	0.23747	0.52174	0.999997	10520	3	-4.8214	0.016001	0.049585	0.868033	1149	2	-4.8214
RTCB	10	0.0085585	0.048597	0.734063	1246	8	-6.2158	0.016055	0.053178	0.883224	1150	1	-6.2158
ZNF446	9	0.45799	0.75738	0.999997	14766	5	-5.2996	0.016059	0.050609	0.877846	1151	1	-5.2996
UBE3C	10	0.061944	0.23168	0.952746	4677	3	-0.29436	0.01606	0.053187	0.883224	1152	4	-0.29436
ALOX12B	9	0.24441	0.55204	0.999997	10711	5	-5.4754	0.016138	0.050822	0.877846	1153	3	-5.4754
PRL	8	0.22136	0.50074	0.999997	10071	5	-6.2516	0.01616	0.050029	0.872434	1154	1	-6.2516
MOBP	10	0.17753	0.46938	0.999997	8874	6	-6.3105	0.016165	0.053448	0.883565	1155	4	-6.3105
TRAV12-3	7	0.54461	0.78872	0.999997	15988	3	-5.5965	0.016171	0.047605	0.862294	1156	2	-5.5965
MICA	9	0.0563	0.20625	0.943184	4394	6	-6.3125	0.016204	0.051011	0.877846	1157	2	-6.3125
NXF3	10	0.21836	0.52421	0.999997	9966	3	-5.6978	0.016223	0.053595	0.883565	1158	3	-5.6978
RND2	9	0.7297	0.91223	0.999997	18097	2	-3.3182	0.016252	0.051157	0.877846	1159	4	-3.3182
OR12D2	10	0.81414	0.95003	0.999997	18846	4	-5.5103	0.016269	0.053709	0.883565	1160	3	-5.5103
EDDM3B	9	0.204	0.49237	0.999997	9618	2	0.3749	0.016282	0.051233	0.877846	1161	4	0.3749
MRAP2	10	0.092625	0.30316	0.984201	6019	6	-5.36	0.016285	0.053746	0.883565	1162	4	-5.36
BTNL9	8	0.2599	0.55012	0.999997	11067	4	-5.9366	0.016289	0.05039	0.875264	1163	1	-5.9366
CRMP1	9	0.74432	0.91966	0.999997	18250	4	-5.9071	0.016318	0.051325	0.877846	1164	3	-5.9071
ZNF337	10	0.28048	0.60123	0.999997	11520	6	-5.5682	0.016351	0.053921	0.883565	1165	2	-5.5682
EGLN3	9	0.28642	0.59893	0.999997	11647	3	-5.703	0.016377	0.05148	0.877846	1166	3	-5.703
MAML1	7	0.20768	0.47374	0.999997	9725	4	-5.4261	0.016378	0.048042	0.863914	1167	2	-5.4261
FA2H	8	0.48228	0.75736	0.999997	15163	2	0.85962	0.016386	0.050647	0.877846	1168	4	0.85962
SLC1A5	9	0.7131	0.90382	0.999997	17919	3	-3.8025	0.016398	0.051532	0.877846	1169	2	-3.8025
DR1	8	0.59021	0.8312	0.999997	16588	2	0.13751	0.016413	0.050732	0.877846	1170	4	0.13751
HSPD1	10	3.0363e-05	0.00027166	0.120426	41	6	-6.1511	0.016435	0.054129	0.883565	1171	3	-6.1511
CLEC17A	9	0.47876	0.77472	0.999997	15099	3	-4.9633	0.016438	0.051659	0.877846	1172	3	-4.9633
KLF7	9	0.68659	0.89031	0.999997	17642	3	-5.5342	0.016446	0.051685	0.877846	1173	1	-5.5342
TRIM32	9	0.36634	0.67644	0.999997	13247	5	-6.552	0.016453	0.051701	0.877846	1174	2	-6.552
DOCK11	9	0.15134	0.40705	0.999997	8099	4	-5.7616	0.016459	0.051715	0.877846	1175	4	-5.7616
CLRN1	6	0.99651	0.99655	0.999997	20309	0	0.58374	0.016467	0.043937	0.850613	1176	3	0.58374
CDO1	8	0.64889	0.86658	0.999997	17279	3	-1.6335	0.016479	0.050905	0.877846	1177	3	-1.6335
DHX35	10	0.73869	0.91992	0.999997	18201	4	-5.1748	0.016512	0.05432	0.883565	1178	1	-5.1748
C1orf134	9	0.55529	0.8216	0.999997	16125	3	-1.7054	0.016528	0.051884	0.877846	1179	4	-1.7054
SUMO1	10	0.043441	0.17777	0.918658	3716	5	-6.054	0.016533	0.054372	0.883565	1180	3	-6.054
AP000695	9	0.081762	0.27407	0.966031	5591	5	-5.6107	0.016543	0.051918	0.877846	1181	2	-5.6107
RP11-51F16	7	0.78645	0.91713	0.999997	18623	2	-0.77195	0.016554	0.04842	0.865588	1182	3	-0.77195
PCDH11Y	10	0.68569	0.89876	0.999997	17633	4	-2.2328	0.016566	0.054449	0.883565	1183	4	-2.2328
PPP2R1B	10	0.60735	0.86453	0.999997	16804	3	-0.25728	0.016578	0.054481	0.883565	1184	4	-0.25728
TRBV6-8	9	0.4629	0.76155	0.999997	14854	3	0.22337	0.016582	0.052016	0.877846	1185	4	0.22337
AL158147	8	0.15939	0.41495	0.999997	8354	3	-5.4029	0.016586	0.05119	0.877846	1186	2	-5.4029
FCN2	9	0.56751	0.82817	0.999997	16284	4	-4.8999	0.016591	0.052041	0.877846	1187	2	-4.8999
BTBD16	8	0.55786	0.80969	0.999997	16158	3	-0.079553	0.016633	0.051325	0.877846	1188	3	-0.079553
ZIC5	9	0.73273	0.91379	0.999997	18132	3	-4.7633	0.01664	0.052177	0.877846	1189	2	-4.7633
TAF15	9	0.29544	0.60794	0.999997	11832	3	0.0667	0.016681	0.052275	0.877846	1190	4	0.0667
ADAMTS14	9	0.43636	0.73886	0.999997	14448	2	-4.8612	0.016703	0.052342	0.877846	1191	3	-4.8612
POMP	9	0.56751	0.82817	0.999997	16283	4	-0.76963	0.016707	0.052347	0.877846	1192	4	-0.76963
SLC9A9	8	0.86496	0.95497	0.999997	19250	2	-5.1151	0.01672	0.051559	0.877846	1193	3	-5.1151
F3	8	0.30354	0.60301	0.999997	11984	3	0.69269	0.016732	0.051586	0.877846	1194	4	0.69269
CPSF7	10	0.26975	0.58841	0.999997	11270	5	-5.4034	0.016734	0.054884	0.883565	1195	4	-5.4034
ORMDL3	10	0.46481	0.77089	0.999997	14887	5	-5.4769	0.016754	0.054929	0.883565	1196	4	-5.4769
BTF3L4	6	0.76881	0.88804	0.999997	18480	2	-4.5323	0.016785	0.044617	0.8551	1197	2	-4.5323
RNF145	9	0.38871	0.69685	0.999997	13653	3	-1.3257	0.016804	0.052608	0.880047	1198	3	-1.3257
SEL1L	10	0.61166	0.86712	0.999997	16861	3	-2.5163	0.016831	0.055112	0.883565	1199	4	-2.5163
AC018630	5	0.89892	0.92761	0.999997	19507	1	1.3509	0.016846	0.043076	0.847602	1200	3	1.3509
APOL3	10	0.36837	0.6989	0.999997	13290	6	-5.8587	0.016861	0.055181	0.883565	1201	2	-5.8587
ILF2	7	0.30241	0.58163	0.999997	11970	3	-5.9581	0.016913	0.04916	0.866803	1202	3	-5.9581
CCL15-CCL14	8	0.2419	0.52732	0.999997	10630	2	-1.3361	0.01692	0.052093	0.877846	1203	4	-1.3361
VPS45	9	0.43893	0.74104	0.999997	14489	5	-5.1413	0.01693	0.052954	0.882219	1204	1	-5.1413
ZNF749	7	0.53291	0.78249	0.999997	15835	3	-5.3078	0.016932	0.049201	0.866803	1205	3	-5.3078
TMEM179B	10	0.05032	0.19984	0.936189	4098	5	-5.6982	0.017022	0.055586	0.883565	1206	2	-5.6982
CIITA	10	0.69572	0.90284	0.999997	17746	3	-3.9259	0.017106	0.055783	0.883565	1207	4	-3.9259
RASL10B	9	0.65665	0.87488	0.999997	17355	3	-1.3654	0.017115	0.053428	0.883565	1208	4	-1.3654
ALDH4A1	9	0.67697	0.88538	0.999997	17550	4	-4.76	0.017123	0.053456	0.883565	1209	3	-4.76
PLXNA2	8	0.4263	0.71717	0.999997	14296	4	-5.175	0.017128	0.052666	0.880188	1210	1	-5.175
TBC1D3B	6	0.92741	0.95706	0.999997	19720	1	0.29139	0.017131	0.045393	0.859479	1211	2	0.29139
ZDBF2	8	0.54857	0.80335	0.999997	16041	2	-3.3713	0.017146	0.05272	0.880188	1212	3	-3.3713
FKBP6	8	0.1308	0.36608	0.995301	7454	6	-6.5778	0.017171	0.052789	0.880188	1213	2	-6.5778
C19orf10	10	0.03455	0.14811	0.888638	3189	6	-5.5231	0.017183	0.055983	0.883565	1214	1	-5.5231
EGR4	5	0.30446	0.5353	0.999997	12011	2	-5.8179	0.017198	0.043878	0.850613	1215	2	-5.8179
RP11-595B24	9	0.39237	0.70011	0.999997	13705	4	-6.1458	0.017235	0.05375	0.883565	1216	4	-6.1458
SCHIP1	10	0.96207	0.9895	0.999997	19978	2	-1.9695	0.017239	0.056105	0.883565	1217	3	-1.9695
TBC1D10C	10	0.44317	0.75572	0.999997	14558	5	-5.5582	0.017294	0.056246	0.883565	1218	2	-5.5582
EXOC3L1	9	0.64395	0.86827	0.999997	17227	3	-5.4703	0.017317	0.053953	0.883565	1219	1	-5.4703
LETMD1	9	0.14213	0.39102	0.999997	7819	3	-0.0022967	0.017337	0.054011	0.883565	1220	4	-0.0022967
GKN2	10	0.031798	0.13858	0.885184	3000	4	-2.8824	0.017362	0.05641	0.883565	1221	4	-2.8824
RSF1	8	0.74072	0.90325	0.999997	18223	3	-5.3009	0.017386	0.053397	0.883565	1222	2	-5.3009
CAMSAP1	8	0.25974	0.54993	0.999997	11054	4	-2.4117	0.017413	0.053475	0.883565	1223	4	-2.4117
NOVA2	10	0.027897	0.12493	0.880584	2753	8	-6.8217	0.017452	0.056651	0.883842	1224	1	-6.8217
DMPK	9	0.059293	0.21451	0.947739	4537	5	-5.9356	0.017462	0.054309	0.883565	1225	1	-5.9356
TGFB1I1	6	0.44726	0.69299	0.999997	14598	3	-1.8574	0.017522	0.046265	0.860394	1226	3	-1.8574
FAM107A	9	0.5784	0.83392	0.999997	16428	4	-5.9243	0.017534	0.054483	0.883565	1227	3	-5.9243
MSH5	8	0.065481	0.22131	0.95059	4845	3	-2.5526	0.017559	0.053872	0.883565	1228	4	-2.5526
RNF215	10	0.61218	0.86744	0.999997	16863	4	-4.9867	0.017559	0.056897	0.883842	1229	4	-4.9867
HIST1H4L	9	0.70023	0.89729	0.999997	17794	3	-5.4175	0.017579	0.054602	0.883565	1230	3	-5.4175
NKX2-5	9	0.075207	0.25714	0.963207	5302	4	-5.642	0.017606	0.054668	0.883565	1231	2	-5.642
RNASEL	10	0.11896	0.35961	0.99289	7066	3	-1.9679	0.017635	0.057088	0.883842	1232	4	-1.9679
SEMG2	10	0.10218	0.3242	0.984525	6381	4	-4.6949	0.017667	0.057165	0.883842	1233	2	-4.6949
FBP1	5	0.084209	0.22457	0.95059	5702	3	-5.0373	0.017672	0.044986	0.857393	1234	2	-5.0373
AC008443	7	0.41422	0.68943	0.999997	14090	4	-5.8357	0.017713	0.050755	0.877846	1235	2	-5.8357
VNN2	9	0.40669	0.71289	0.999997	13959	3	0.63601	0.017751	0.055031	0.883565	1236	4	0.63601
CTD-3138B18	5	0.23419	0.46183	0.999997	10428	2	1.1161	0.01776	0.04519	0.857983	1237	3	1.1161
RP11-447L10	9	0.80777	0.93945	0.999997	18788	3	-4.6292	0.017775	0.055075	0.883565	1238	3	-4.6292
MTMR10	8	0.61065	0.84474	0.999997	16848	2	-4.1198	0.017776	0.054447	0.883565	1239	2	-4.1198
LSM14B	10	0.55522	0.83177	0.999997	16123	4	-5.4038	0.017814	0.057523	0.884441	1240	3	-5.4038
PLA2G4D	10	0.36697	0.69745	0.999997	13260	5	-4.9695	0.017823	0.057545	0.884441	1241	3	-4.9695
GCLM	10	0.015868	0.079945	0.793634	1930	8	-6.5689	0.017828	0.057561	0.884441	1242	2	-6.5689
DHPS	7	0.70784	0.87705	0.999997	17863	3	-5.0728	0.017834	0.051009	0.877846	1243	2	-5.0728
C11orf96	6	0.88032	0.94264	0.999997	19356	1	-0.1387	0.017853	0.046986	0.862294	1244	2	-0.1387
WNT7A	8	0.20096	0.47349	0.999997	9527	3	-5.8302	0.017859	0.054671	0.883565	1245	3	-5.8302
C17orf107	9	0.82007	0.94331	0.999997	18884	2	-0.37745	0.017883	0.055356	0.883565	1246	4	-0.37745
STH	9	0.24852	0.5579	0.999997	10817	3	-4.7447	0.017886	0.055362	0.883565	1247	4	-4.7447
RNF31	9	0.76844	0.92721	0.999997	18477	3	-2.6735	0.01791	0.055423	0.883565	1248	4	-2.6735
HOXD4	9	0.96862	0.98856	0.999997	20037	1	-2.3674	0.017916	0.055438	0.883565	1249	3	-2.3674
KRT222	9	0.64549	0.86905	0.999997	17246	2	-1.9555	0.017945	0.055499	0.883565	1250	3	-1.9555
CXXC1	9	0.62589	0.85885	0.999997	17016	3	-4.6292	0.017993	0.055616	0.883565	1251	2	-4.6292
PPP2R2D	8	0.36173	0.66898	0.999997	13157	4	-2.4176	0.018012	0.055086	0.883565	1252	3	-2.4176
TAF3	8	0.72248	0.89583	0.999997	18015	3	-5.6001	0.01803	0.055141	0.883565	1253	2	-5.6001
RLTPR	10	0.35666	0.6867	0.999997	13054	6	-6.2981	0.018042	0.058092	0.88632	1254	2	-6.2981
JDP2	9	0.098851	0.31168	0.984201	6269	4	-6.2033	0.018095	0.05587	0.883565	1255	2	-6.2033
TMEM64	8	0.88408	0.95955	0.999997	19386	2	-2.3646	0.018123	0.055388	0.883565	1256	3	-2.3646
NCOR2	9	0.016633	0.081193	0.799463	1992	4	-4.6238	0.018137	0.055982	0.883565	1257	3	-4.6238
FOXD2	8	0.10408	0.31022	0.984201	6474	5	-7.0975	0.018144	0.055436	0.883565	1258	2	-7.0975
ST6GALNAC2	6	0.92126	0.95547	0.999997	19680	1	0.79556	0.018144	0.047609	0.862294	1259	3	0.79556
C1orf233	9	0.3778	0.68685	0.999997	13465	5	-5.1301	0.018162	0.056044	0.883565	1260	1	-5.1301
RP11-160N1	8	0.91657	0.96844	0.999997	19652	2	0.37166	0.018181	0.055541	0.883565	1261	4	0.37166
MMP13	9	0.67405	0.8839	0.999997	17528	2	-2.199	0.018197	0.056133	0.883565	1262	4	-2.199
TM6SF1	9	0.054786	0.20206	0.937659	4311	7	-6.0777	0.018234	0.056237	0.883565	1263	1	-6.0777
MAP1S	9	0.97801	0.99194	0.999997	20105	2	-3.9442	0.018236	0.056238	0.883565	1264	4	-3.9442
IGKV2-28	3	0.19717	0.34517	0.985935	9422	1	1.671	0.01824	0.035313	0.827646	1265	2	1.671
APOC1	9	0.098437	0.31088	0.984201	6250	3	-0.015312	0.018244	0.056261	0.883565	1266	4	-0.015312
CCDC176	9	0.86724	0.95918	0.999997	19262	3	-4.0657	0.018286	0.056376	0.883565	1267	3	-4.0657
NEFM	8	0.029028	0.12168	0.874314	2830	5	-6.5703	0.018288	0.05587	0.883565	1268	1	-6.5703
TLR6	9	0.76256	0.92545	0.999997	18437	1	-4.6397	0.0183	0.056414	0.883565	1269	3	-4.6397
TCF4	9	0.075021	0.25661	0.963207	5294	7	-6.3757	0.018332	0.056492	0.883842	1270	2	-6.3757
GOLGA4	7	0.031535	0.12082	0.872976	2982	6	-5.6277	0.018353	0.052077	0.877846	1271	1	-5.6277
CARD16	7	0.71176	0.8792	0.999997	17910	1	-0.24782	0.018385	0.052142	0.877846	1272	3	-0.24782
GH2	10	0.12771	0.37729	0.999997	7351	5	-5.3744	0.018386	0.058932	0.889914	1273	4	-5.3744
OR4F6	9	0.71889	0.90677	0.999997	17973	4	-5.615	0.018391	0.056649	0.883842	1274	3	-5.615
POU6F2	7	0.44168	0.71438	0.999997	14526	3	-5.9548	0.018403	0.052174	0.877846	1275	2	-5.9548
LSM14A	10	0.084427	0.28467	0.972123	5714	5	-5.4631	0.01842	0.059014	0.889914	1276	2	-5.4631
BAIAP3	9	0.49033	0.78406	0.999997	15268	2	0.61749	0.018427	0.056736	0.883842	1277	4	0.61749
CCDC9	10	0.066759	0.24344	0.954596	4904	6	-5.6832	0.018437	0.05906	0.889914	1278	2	-5.6832
UBR7	8	0.17783	0.4413	0.999997	8894	3	-0.1364	0.018448	0.056292	0.883565	1279	4	-0.1364
IL6ST	9	0.99345	0.99552	0.999997	20258	1	0.71096	0.018473	0.056869	0.883842	1280	4	0.71096
APMAP	8	0.52296	0.78584	0.999997	15717	3	-0.043676	0.018475	0.056376	0.883565	1281	3	-0.043676
SHPK	7	0.29056	0.56967	0.999997	11715	3	-0.19845	0.018481	0.052331	0.877846	1282	3	-0.19845
SLC34A3	9	0.37201	0.68159	0.999997	13352	5	-5.4141	0.018541	0.057059	0.883842	1283	3	-5.4141
IGSF1	8	0.20353	0.47697	0.999997	9605	4	-2.1235	0.018548	0.056578	0.883842	1284	4	-2.1235
ENOSF1	6	0.22357	0.46624	0.999997	10139	2	-2.1191	0.018564	0.048511	0.865588	1285	3	-2.1191
FKBP9	9	0.67927	0.88653	0.999997	17576	4	-4.9412	0.01857	0.057129	0.883842	1286	3	-4.9412
COX5A	9	0.4156	0.72074	0.999997	14117	3	-5.196	0.018572	0.057137	0.883842	1287	1	-5.196
ZNF143	7	0.10648	0.29955	0.982681	6557	5	-5.8899	0.018578	0.052515	0.879939	1288	2	-5.8899
EBF2	8	0.43864	0.72615	0.999997	14484	2	-1.185	0.018612	0.056756	0.883842	1289	4	-1.185
PAGE3	7	0.0095055	0.045769	0.728814	1354	4	-6.3881	0.018614	0.052597	0.880047	1290	2	-6.3881
LINC00923	9	0.99986	0.99986	0.999997	20379	0	0.25429	0.01866	0.057356	0.884441	1291	4	0.25429
SCUBE3	9	0.51764	0.80142	0.999997	15625	4	-4.6292	0.018684	0.057415	0.884441	1292	3	-4.6292
TP53AIP1	10	0.076345	0.26617	0.964277	5353	5	-5.2403	0.018688	0.059686	0.889914	1293	3	-5.2403
GPR82	8	0.044607	0.1683	0.909644	3794	4	-2.4956	0.018692	0.056977	0.883842	1294	3	-2.4956
ZNF713	9	0.8809	0.96405	0.999997	19358	2	-0.083966	0.018696	0.057452	0.884441	1295	4	-0.083966
AAMDC	10	0.5895	0.85341	0.999997	16575	5	-5.0355	0.018724	0.059771	0.889914	1296	4	-5.0355
DNAH3	6	0.059006	0.18538	0.92081	4518	3	-4.5737	0.018732	0.048891	0.866803	1297	2	-4.5737
CASKIN2	6	0.82161	0.91205	0.999997	18894	1	0.59128	0.018753	0.048932	0.866803	1298	3	0.59128
AKR1C3	8	0.59154	0.8321	0.999997	16606	4	-5.2173	0.018762	0.057169	0.883842	1299	3	-5.2173
AIFM2	9	0.10547	0.32438	0.984525	6521	4	-5.368	0.018766	0.057637	0.884441	1300	1	-5.368
NEUROD6	9	0.9286	0.97833	0.999997	19733	2	-4.8316	0.018777	0.057665	0.884441	1301	3	-4.8316
ZC3HAV1L	9	0.94429	0.9818	0.999997	19852	2	-4.7165	0.018782	0.057685	0.884441	1302	3	-4.7165
KNTC1	10	0.15533	0.43088	0.999997	8211	5	-2.7886	0.018813	0.06	0.889914	1303	4	-2.7886
ENPP4	9	0.072968	0.25123	0.961695	5203	4	-1.4849	0.018825	0.057802	0.885005	1304	3	-1.4849
TNIK	7	0.15159	0.38159	0.999997	8104	4	-5.8179	0.018841	0.053074	0.883046	1305	2	-5.8179
MIEF2	10	0.02165	0.10215	0.847126	2351	6	-6.1012	0.018847	0.060094	0.889914	1306	3	-6.1012
C16orf91	10	0.535	0.81853	0.999997	15873	4	-4.2719	0.018855	0.060114	0.889914	1307	2	-4.2719
S1PR3	9	0.51764	0.80142	0.999997	15622	4	-5.4779	0.018862	0.057901	0.885752	1308	1	-5.4779
SLC6A13	10	0.32045	0.64723	0.999997	12320	5	-3.8512	0.018866	0.060141	0.889914	1309	3	-3.8512
PET117	10	0.0025991	0.016843	0.597734	544	5	-4.8807	0.018876	0.060165	0.889914	1310	4	-4.8807
CHN2	9	0.52396	0.80483	0.999997	15731	4	-5.5998	0.01891	0.058034	0.88632	1311	2	-5.5998
EXOC6B	9	0.16033	0.42223	0.999997	8390	5	-5.5636	0.01897	0.05819	0.88632	1312	3	-5.5636
NRCAM	9	0.093285	0.30087	0.982791	6045	4	0.090135	0.018986	0.058235	0.88632	1313	3	0.090135
CTD-2132N18	7	0.18509	0.43764	0.999997	9074	4	-5.8899	0.018991	0.053389	0.883565	1314	2	-5.8899
S100P	10	0.057637	0.22104	0.95059	4452	3	-4.2339	0.019022	0.06053	0.889914	1315	4	-4.2339
WASF3	10	0.36619	0.69666	0.999997	13241	4	-0.28608	0.019031	0.060557	0.889914	1316	4	-0.28608
PTX3	10	0.77627	0.93501	0.999997	18548	2	-0.44842	0.019046	0.060593	0.889914	1317	4	-0.44842
NKIRAS1	9	0.23544	0.5392	0.999997	10471	5	-5.925	0.019103	0.058537	0.889914	1318	3	-5.925
GPNMB	7	0.10682	0.30019	0.982681	6572	3	-5.9789	0.019135	0.053693	0.883565	1319	2	-5.9789
KRT3	10	0.13736	0.39635	0.999997	7656	4	-5.433	0.019142	0.060819	0.889914	1320	2	-5.433
FAM211B	9	0.032788	0.13665	0.885184	3062	7	-6.4494	0.0192	0.058773	0.889914	1321	1	-6.4494
TET1	10	0.063544	0.23559	0.952746	4765	3	-0.10559	0.019263	0.061125	0.889914	1322	4	-0.10559
KRTAP22-2	7	0.80385	0.9222	0.999997	18748	1	-2.1421	0.019273	0.053985	0.883565	1323	2	-2.1421
FAM156A	8	0.45804	0.74021	0.999997	14771	3	-1.9215	0.019285	0.058602	0.889914	1324	4	-1.9215
ADRA2C	9	0.53926	0.81297	0.999997	15927	4	-4.4562	0.019293	0.058999	0.889914	1325	4	-4.4562
TCEANC2	8	0.64905	0.86664	0.999997	17281	3	-5.2771	0.019318	0.058691	0.889914	1326	1	-5.2771
SET	9	0.33433	0.64619	0.999997	12616	3	-5.7705	0.019332	0.059106	0.889914	1327	2	-5.7705
AC006116	10	0.68407	0.89811	0.999997	17616	3	-5.3861	0.019333	0.061302	0.889914	1328	3	-5.3861
POLR3E	10	0.41354	0.7345	0.999997	14086	2	-4.6099	0.019358	0.061362	0.889914	1329	2	-4.6099
MAGEE1	8	0.20579	0.48002	0.999997	9661	3	-4.9254	0.019367	0.058812	0.889914	1330	2	-4.9254
SAMD5	10	0.19354	0.49121	0.999997	9299	3	-5.2424	0.019436	0.061565	0.889914	1331	3	-5.2424
PKN3	9	0.015864	0.077939	0.788973	1924	5	-6.1391	0.019441	0.059375	0.889914	1332	2	-6.1391
CBX4	9	0.096026	0.30624	0.984201	6137	4	-6.0859	0.019473	0.059464	0.889914	1333	3	-6.0859
TMEM17	9	0.86961	0.96001	0.999997	19276	3	-5.1075	0.019489	0.059507	0.889914	1334	3	-5.1075
SLC24A4	7	0.42165	0.69625	0.999997	14205	2	-5.0895	0.019517	0.054465	0.883565	1335	1	-5.0895
AL031663	10	0.45795	0.76612	0.999997	14765	4	-3.7447	0.019521	0.061761	0.889914	1336	3	-3.7447
NAA50	7	0.18844	0.44296	0.999997	9162	4	-6.5617	0.019531	0.054495	0.883565	1337	3	-6.5617
THPO	8	0.39073	0.69112	0.999997	13687	4	-5.6178	0.019532	0.059276	0.889914	1338	2	-5.6178
NLRP12	8	0.82521	0.93935	0.999997	18926	2	0.72911	0.019581	0.059404	0.889914	1339	4	0.72911
PQLC3	8	0.94023	0.9762	0.999997	19821	2	-4.6751	0.019585	0.059421	0.889914	1340	3	-4.6751
ZNF227	10	0.034872	0.14921	0.888638	3214	6	-6.1301	0.019651	0.06208	0.889914	1341	2	-6.1301
TRDJ3	2	0.98035	0.98048	0.999997	20124	0	0.92874	0.019651	0.036285	0.827646	1342	2	0.92874
MPV17L2	9	0.62449	0.85813	0.999997	16997	3	-4.4901	0.019707	0.060065	0.889914	1343	2	-4.4901
CASC3	9	0.16531	0.43071	0.999997	8560	6	-6.1279	0.019731	0.060132	0.889914	1344	1	-6.1279
ARHGAP18	10	0.24852	0.56247	0.999997	10814	5	-5.3356	0.019758	0.062341	0.889914	1345	1	-5.3356
NCK1	10	0.14632	0.41371	0.999997	7945	4	-2.9383	0.019778	0.062392	0.889914	1346	4	-2.9383
CCT5	9	0.81976	0.94322	0.999997	18880	3	-5.4416	0.019779	0.060284	0.889914	1347	2	-5.4416
LOXL3	7	0.19954	0.46085	0.999997	9496	3	-5.2059	0.01978	0.054995	0.883565	1348	1	-5.2059
HELZ	9	0.99386	0.99566	0.999997	20260	1	-0.47828	0.019792	0.060319	0.889914	1349	4	-0.47828
MRPS23	8	0.20231	0.47531	0.999997	9568	2	-0.54435	0.019808	0.060016	0.889914	1350	3	-0.54435
ERBB4	10	0.15557	0.43134	0.999997	8232	4	-2.1538	0.019811	0.062475	0.889914	1351	2	-2.1538
ZBTB39	6	0.74915	0.87962	0.999997	18309	2	-1.9972	0.019832	0.051306	0.877846	1352	3	-1.9972
DPY19L1	8	0.62142	0.85186	0.999997	16967	3	-2.3683	0.019837	0.060084	0.889914	1353	4	-2.3683
hsa-mir-150	7	0.088992	0.26551	0.964092	5890	4	-5.4422	0.019855	0.055152	0.883565	1354	2	-5.4422
CASP5	10	0.48236	0.78305	0.999997	15166	3	-2.1777	0.01987	0.062625	0.889914	1355	4	-2.1777
ZNF750	7	0.1228	0.33003	0.984525	7205	3	-4.6706	0.019872	0.055186	0.883565	1356	3	-4.6706
C20orf96	10	0.097959	0.31496	0.984201	6218	4	-1.985	0.019909	0.062712	0.889914	1357	4	-1.985
OR5G3	9	0.37663	0.6858	0.999997	13445	4	-5.368	0.019923	0.060663	0.889914	1358	1	-5.368
DCTPP1	9	0.64006	0.86623	0.999997	17172	4	-5.4241	0.019972	0.060782	0.889914	1359	1	-5.4241
SAP30	9	0.6394	0.86591	0.999997	17164	4	-1.0399	0.019991	0.060825	0.889914	1360	4	-1.0399
OR1G1	9	0.14427	0.39476	0.999997	7901	4	-5.5563	0.02002	0.060907	0.889914	1361	2	-5.5563
ZBTB21	7	0.40703	0.6828	0.999997	13968	3	-4.4975	0.020042	0.055516	0.883565	1362	3	-4.4975
RP11-1055B8	10	0.00017971	0.0014457	0.25635	104	4	-3.644	0.020066	0.063081	0.889914	1363	4	-3.644
C21orf128	9	0.41854	0.72333	0.999997	14165	5	-6.0074	0.020068	0.061039	0.889914	1364	2	-6.0074
SLC4A3	8	0.81009	0.93263	0.999997	18806	1	-3.2697	0.02007	0.060708	0.889914	1365	3	-3.2697
ATXN7L1	8	0.21251	0.48903	0.999997	9830	5	-5.6134	0.02009	0.060751	0.889914	1366	1	-5.6134
FOXM1	7	0.46057	0.73104	0.999997	14827	2	-5.7994	0.020114	0.055651	0.883565	1367	2	-5.7994
KBTBD3	9	0.82367	0.94452	0.999997	18914	1	-4.8037	0.020116	0.061169	0.889914	1368	2	-4.8037
CD9	10	0.04513	0.18329	0.919146	3825	4	-1.7456	0.020151	0.063305	0.889914	1369	4	-1.7456
CIB1	9	0.083924	0.2795	0.968486	5686	3	-1.4949	0.020158	0.061285	0.889914	1370	3	-1.4949
C7orf55-LUC7L2	5	0.19087	0.41517	0.999997	9219	3	-5.861	0.020247	0.050916	0.877846	1371	1	-5.861
PASK	9	0.91353	0.9754	0.999997	19626	1	-0.5972	0.020259	0.061549	0.889914	1372	4	-0.5972
IL23A	9	0.053006	0.19698	0.931325	4218	6	-7.1057	0.020298	0.061656	0.889914	1373	3	-7.1057
SLC25A28	8	0.44806	0.73296	0.999997	14618	4	-5.6334	0.020302	0.061317	0.889914	1374	2	-5.6334
TMEM57	8	0.50658	0.77438	0.999997	15492	3	-4.4117	0.020322	0.061365	0.889914	1375	3	-4.4117
PCLO	8	0.41796	0.71107	0.999997	14142	2	-4.7339	0.020338	0.061414	0.889914	1376	2	-4.7339
PLA2G12A	9	0.82754	0.94574	0.999997	18945	3	-4.9855	0.020358	0.061811	0.889914	1377	3	-4.9855
LFNG	8	0.7867	0.92249	0.999997	18624	3	-2.8892	0.020379	0.061521	0.889914	1378	3	-2.8892
FRMD3	10	0.17987	0.47262	0.999997	8943	5	-5.572	0.020401	0.063928	0.889914	1379	3	-5.572
UNC13C	9	0.43232	0.73534	0.999997	14388	2	-2.2052	0.020427	0.062001	0.889914	1380	4	-2.2052
KRTAP10-5	9	0.06372	0.22653	0.951324	4777	5	-6.4629	0.020464	0.062087	0.889914	1381	2	-6.4629
SRSF8	7	0.75263	0.90186	0.999997	18340	2	-5.0296	0.020493	0.056414	0.883565	1382	1	-5.0296
KIAA1468	9	0.21354	0.50691	0.999997	9851	6	-5.6366	0.020502	0.06219	0.889914	1383	3	-5.6366
DNAH2	10	0.12818	0.37823	0.999997	7374	5	-3.0355	0.020508	0.064199	0.889914	1384	3	-3.0355
ZNF582	10	0.58092	0.84807	0.999997	16459	4	-5.5099	0.020512	0.064211	0.889914	1385	2	-5.5099
C1QL3	9	0.097907	0.30986	0.984201	6216	4	-0.59008	0.020517	0.062224	0.889914	1386	4	-0.59008
RNASE13	8	0.17341	0.43506	0.999997	8768	4	-2.4903	0.02052	0.0619	0.889914	1387	4	-2.4903
TM7SF2	9	0.80542	0.93869	0.999997	18766	3	-4.7899	0.02055	0.062319	0.889914	1388	4	-4.7899
ST3GAL6	9	0.74876	0.92135	0.999997	18306	2	-4.3191	0.020551	0.062325	0.889914	1389	3	-4.3191
IQCJ-SCHIP1	7	0.14104	0.36295	0.994914	7778	4	-6.1166	0.020592	0.05663	0.883842	1390	2	-6.1166
TACR3	10	0.11317	0.34767	0.985935	6837	6	-5.9016	0.020618	0.064482	0.889914	1391	3	-5.9016
KRTAP19-1	9	0.83923	0.94966	0.999997	19051	3	-0.48952	0.020633	0.062527	0.889914	1392	4	-0.48952
ZNF415	9	0.60401	0.84737	0.999997	16764	4	-5.393	0.020646	0.062554	0.889914	1393	1	-5.393
ZNF534	9	0.70481	0.89961	0.999997	17838	1	-2.6847	0.020651	0.062567	0.889914	1394	3	-2.6847
P4HA2	10	0.32877	0.6565	0.999997	12482	4	-5.0736	0.020666	0.064598	0.889914	1395	3	-5.0736
UPF2	10	0.4766	0.77915	0.999997	15073	4	-4.6256	0.020722	0.064736	0.889914	1396	1	-4.6256
SLC25A2	9	0.52522	0.80551	0.999997	15747	2	-4.7179	0.020727	0.062768	0.889914	1397	4	-4.7179
PRKG1	9	0.14571	0.39723	0.999997	7926	4	-4.4508	0.020774	0.062884	0.889914	1398	4	-4.4508
ZNF287	8	0.092651	0.28494	0.972123	6021	3	-1.6864	0.020828	0.062696	0.889914	1399	4	-1.6864
RPUSD2	9	0.36895	0.67885	0.999997	13299	5	-5.3853	0.020839	0.06305	0.889914	1400	3	-5.3853
BUD13	8	0.070671	0.23389	0.952746	5093	4	-5.6765	0.02084	0.062726	0.889914	1401	1	-5.6765
MAPK3	10	0.0050339	0.030368	0.698953	841	3	-0.027235	0.020856	0.065083	0.889914	1402	4	-0.027235
SMO	9	0.34288	0.65428	0.999997	12783	5	-5.4754	0.020867	0.063132	0.889914	1403	4	-5.4754
FAM177A1	9	0.14933	0.40356	0.999997	8034	4	-5.0296	0.020876	0.063153	0.889914	1404	3	-5.0296
C3orf33	10	0.6048	0.86297	0.999997	16768	4	-1.3967	0.020883	0.065153	0.889914	1405	4	-1.3967
PMEL	9	0.50372	0.79395	0.999997	15471	2	0.14761	0.020887	0.063172	0.889914	1406	4	0.14761
CORO2A	6	0.26126	0.51564	0.999997	11090	4	-5.7072	0.020908	0.053624	0.883565	1407	1	-5.7072
FUT9	8	0.19987	0.47203	0.999997	9498	4	-2.5759	0.020929	0.062972	0.889914	1408	4	-2.5759
C1orf229	8	0.85557	0.95287	0.999997	19178	2	-4.2933	0.020936	0.062988	0.889914	1409	2	-4.2933
ST6GALNAC3	10	0.14375	0.40881	0.999997	7882	6	-5.8005	0.02094	0.065301	0.889914	1410	3	-5.8005
XRCC6BP1	7	0.89491	0.95367	0.999997	19479	2	0.61749	0.02098	0.057407	0.884441	1411	3	0.61749
OR52N1	8	0.045511	0.17066	0.910613	3834	5	-6.2585	0.020989	0.063138	0.889914	1412	1	-6.2585
OR4D5	10	0.58292	0.84926	0.999997	16488	5	-5.2127	0.021011	0.065468	0.889914	1413	3	-5.2127
ACOT6	9	0.61126	0.85118	0.999997	16852	4	-3.6615	0.02102	0.06353	0.889914	1414	4	-3.6615
DCLK1	8	0.15061	0.40214	0.999997	8072	5	-5.8166	0.02104	0.063271	0.889914	1415	3	-5.8166
AL049840	9	0.26765	0.57987	0.999997	11230	4	-4.8612	0.021047	0.063598	0.889914	1416	3	-4.8612
TCF15	9	0.047246	0.1805	0.918658	3936	7	-6.2467	0.02108	0.06368	0.889914	1417	1	-6.2467
PACS1	8	0.91657	0.96844	0.999997	19651	1	0.080739	0.021086	0.063383	0.889914	1418	4	0.080739
MIB1	10	0.94099	0.98534	0.999997	19827	3	-4.3476	0.021096	0.065689	0.889914	1419	3	-4.3476
ZNF174	8	0.60514	0.84111	0.999997	16771	3	-4.8856	0.021099	0.063418	0.889914	1420	3	-4.8856
ZNF747	8	0.17972	0.44396	0.999997	8929	5	-5.49	0.021118	0.063464	0.889914	1421	2	-5.49
KCNE2	6	0.46053	0.70269	0.999997	14824	2	-2.0117	0.021122	0.054093	0.883565	1422	3	-2.0117
TAGLN	9	0.30686	0.61934	0.999997	12044	4	0.20202	0.021128	0.063805	0.889914	1423	4	0.20202
CAMK2B	10	0.78609	0.9389	0.999997	18617	4	-5.703	0.02114	0.065796	0.889914	1424	4	-5.703
EGR1	9	0.20443	0.49302	0.999997	9634	2	-5.1301	0.021165	0.063906	0.889914	1425	3	-5.1301
BMP15	7	0.45631	0.72735	0.999997	14749	4	-5.0253	0.021167	0.057808	0.885005	1426	1	-5.0253
BCL9	10	0.12418	0.37023	0.997185	7240	5	-4.7007	0.021182	0.0659	0.889914	1427	4	-4.7007
RAB40B	10	0.41719	0.73714	0.999997	14133	5	-5.5162	0.021183	0.065902	0.889914	1428	3	-5.5162
PCDHGC3	5	0.91481	0.93429	0.999997	19632	1	-0.53747	0.021199	0.05309	0.883046	1429	2	-0.53747
FAM200A	10	0.8406	0.95834	0.999997	19063	1	-3.3274	0.021211	0.065967	0.889914	1430	4	-3.3274
CCL21	9	0.95942	0.98577	0.999997	19960	2	-4.3858	0.021225	0.064063	0.889914	1431	2	-4.3858
USP9Y	8	0.21088	0.48685	0.999997	9791	2	-1.1122	0.021228	0.063752	0.889914	1432	4	-1.1122
EID2	9	0.6146	0.85292	0.999997	16888	4	-4.9788	0.021251	0.064132	0.889914	1433	2	-4.9788
BNIPL	9	0.41275	0.71823	0.999997	14071	5	-5.7152	0.021273	0.064186	0.889914	1434	2	-5.7152
PGAM2	10	0.78437	0.93823	0.999997	18599	3	-3.9871	0.021287	0.066174	0.891289	1435	4	-3.9871
ANKRD13A	8	0.83708	0.94463	0.999997	19030	3	-5.0777	0.021289	0.063923	0.889914	1436	1	-5.0777
RP11-766F14	8	0.6147	0.84739	0.999997	16895	2	-1.9056	0.021307	0.063974	0.889914	1437	3	-1.9056
TAAR2	8	0.14175	0.38781	0.999997	7802	6	-5.1078	0.021332	0.064033	0.889914	1438	1	-5.1078
CCNG2	9	0.28642	0.59893	0.999997	11650	3	-4.8965	0.021353	0.06438	0.889914	1439	3	-4.8965
PTEN	7	0.75784	0.90476	0.999997	18401	2	-1.1227	0.021369	0.058203	0.88632	1440	3	-1.1227
CALCB	7	0.0092411	0.044749	0.725855	1318	3	-4.6274	0.021376	0.058216	0.88632	1441	3	-4.6274
DCTN6	8	0.62006	0.85094	0.999997	16938	3	-5.2363	0.021393	0.064192	0.889914	1442	3	-5.2363
ATL1	10	0.34249	0.6715	0.999997	12765	3	-0.37614	0.021395	0.066446	0.891979	1443	4	-0.37614
KRTAP5-10	9	0.75568	0.92338	0.999997	18373	3	0.61749	0.021411	0.064521	0.889914	1444	4	0.61749
IQCF3	8	0.95164	0.98058	0.999997	19901	2	0.43505	0.021416	0.064245	0.889914	1445	3	0.43505
TMEM50A	9	0.17776	0.45107	0.999997	8882	4	-5.5563	0.021465	0.064657	0.889914	1446	1	-5.5563
MPDU1	10	0.5882	0.8526	0.999997	16559	4	-2.6317	0.021483	0.066671	0.891979	1447	4	-2.6317
CDCA2	8	0.27168	0.5646	0.999997	11313	4	-3.1657	0.02151	0.064487	0.889914	1448	3	-3.1657
MEN1	9	0.0061815	0.034272	0.706808	977	6	-6.4806	0.021514	0.064772	0.889914	1449	2	-6.4806
KMT2E	10	0.8022	0.94529	0.999997	18740	3	-2.4753	0.021522	0.066772	0.891979	1450	4	-2.4753
C1orf94	10	0.0047137	0.028666	0.683035	803	5	-2.5291	0.021527	0.06678	0.891979	1451	4	-2.5291
RIOK1	9	0.75568	0.92338	0.999997	18375	3	-5.2906	0.02154	0.064831	0.889914	1452	3	-5.2906
ZNF786	8	0.24555	0.53197	0.999997	10731	3	-2.4766	0.021546	0.064571	0.889914	1453	1	-2.4766
PHTF2	10	0.42067	0.73967	0.999997	14192	5	-5.3488	0.021577	0.066881	0.891979	1454	3	-5.3488
TCTN2	9	0.1417	0.39027	0.999997	7796	5	-5.8186	0.021586	0.06494	0.889914	1455	1	-5.8186
C3orf67	9	0.14726	0.39997	0.999997	7975	4	-5.7724	0.021586	0.06494	0.889914	1456	1	-5.7724
C9orf16	9	0.70106	0.89771	0.999997	17799	3	-2.3736	0.021593	0.06496	0.889914	1457	3	-2.3736
TEX40	7	0.34613	0.62505	0.999997	12862	3	-4.6706	0.021692	0.058869	0.889914	1458	1	-4.6706
KCNMB3	9	0.20306	0.49092	0.999997	9591	5	-5.6946	0.021701	0.065232	0.889914	1459	2	-5.6946
ADAMTSL5	9	0.01311	0.066176	0.772892	1696	4	-0.54723	0.021704	0.065238	0.889914	1460	4	-0.54723
EMC7	9	0.32916	0.64114	0.999997	12496	3	-5.2906	0.021714	0.065265	0.889914	1461	4	-5.2906
PRPF4	8	0.80996	0.93258	0.999997	18803	3	-5.3628	0.021717	0.065032	0.889914	1462	1	-5.3628
IGSF3	10	0.93355	0.98303	0.999997	19769	2	-4.3379	0.021817	0.06745	0.893085	1463	3	-4.3379
PRR19	7	0.77589	0.91412	0.999997	18542	2	-3.4255	0.021822	0.059114	0.889914	1464	2	-3.4255
PTGES3L	9	0.10231	0.31832	0.984201	6394	6	-5.7068	0.021826	0.06556	0.889914	1465	2	-5.7068
LMX1A	9	0.060207	0.21707	0.94829	4588	6	-5.9071	0.021828	0.065567	0.889914	1466	2	-5.9071
SMARCC1	10	0.50007	0.79519	0.999997	15419	2	-0.37903	0.021877	0.067607	0.893085	1467	4	-0.37903
IL22RA2	8	0.31442	0.61583	0.999997	12196	5	-5.2616	0.02188	0.065462	0.889914	1468	2	-5.2616
ZNF879	10	0.10605	0.33248	0.984525	6543	5	-3.2569	0.021884	0.067629	0.893085	1469	4	-3.2569
AWAT1	8	0.026741	0.11361	0.857715	2679	5	-6.1121	0.021889	0.065485	0.889914	1470	2	-6.1121
TMEM171	9	0.42333	0.72755	0.999997	14238	3	-5.8356	0.021897	0.065741	0.889914	1471	2	-5.8356
MAN2C1	8	0.58061	0.82489	0.999997	16456	3	-4.8438	0.02191	0.065542	0.889914	1472	3	-4.8438
EPS8L3	9	0.14213	0.39102	0.999997	7818	4	-4.8725	0.021923	0.06581	0.889914	1473	3	-4.8725
OSM	9	0.25819	0.57003	0.999997	11028	3	-0.58146	0.02193	0.065829	0.889914	1474	4	-0.58146
GABRQ	10	0.05032	0.19984	0.936189	4099	5	-5.3593	0.021939	0.067756	0.8933	1475	4	-5.3593
ATG4C	9	0.49799	0.79027	0.999997	15388	4	-5.3427	0.021945	0.06587	0.889914	1476	3	-5.3427
SCN11A	9	0.5611	0.8247	0.999997	16200	4	-0.78458	0.021946	0.065872	0.889914	1477	4	-0.78458
BBS12	9	0.20715	0.49724	0.999997	9701	6	-5.5808	0.021957	0.065895	0.889914	1478	2	-5.5808
ELP2	10	0.27228	0.59138	0.999997	11334	6	-6.2051	0.022006	0.067912	0.893625	1479	1	-6.2051
NTAN1	9	0.14583	0.39746	0.999997	7927	4	-5.2906	0.022008	0.066019	0.889914	1480	3	-5.2906
DOCK2	8	0.1296	0.36364	0.994914	7417	1	0.59971	0.022037	0.065897	0.889914	1481	4	0.59971
SERPINE2	7	0.077911	0.24351	0.954596	5426	5	-6.9632	0.022067	0.059606	0.889914	1482	2	-6.9632
NDUFS8	7	0.48697	0.75406	0.999997	15233	3	-5.4027	0.022119	0.059698	0.889914	1483	3	-5.4027
IGKV3-20	8	0.23836	0.52282	0.999997	10536	2	-2.2152	0.02218	0.066268	0.891975	1484	4	-2.2152
SIGLEC15	9	0.90666	0.97345	0.999997	19567	3	-2.2178	0.022243	0.066616	0.891979	1485	4	-2.2178
NR1D1	10	0.69475	0.90244	0.999997	17730	4	-4.9947	0.022288	0.068616	0.894736	1486	3	-4.9947
SELK	9	0.17297	0.44324	0.999997	8757	4	-4.788	0.022302	0.066785	0.891979	1487	4	-4.788
F11R	9	0.040266	0.15978	0.902891	3520	5	-6.3733	0.022308	0.0668	0.891979	1488	4	-6.3733
RP11-210M15	4	0.34935	0.55982	0.999997	12914	2	-2.0667	0.022349	0.04845	0.865588	1489	2	-2.0667
WDR49	6	0.4895	0.72381	0.999997	15263	2	-4.6964	0.022386	0.05684	0.883842	1490	1	-4.6964
CRLF3	8	0.82146	0.93769	0.999997	18893	3	-4.3414	0.022402	0.066871	0.891979	1491	2	-4.3414
DAB1	9	0.58698	0.83847	0.999997	16539	4	-4.788	0.02241	0.067059	0.892959	1492	3	-4.788
POU3F2	9	0.87262	0.96106	0.999997	19293	1	-5.0716	0.022428	0.067105	0.892959	1493	2	-5.0716
MSR1	10	0.036815	0.15579	0.897073	3334	2	-5.4283	0.022433	0.069004	0.896757	1494	2	-5.4283
CXorf58	8	0.83603	0.94414	0.999997	19023	2	-0.20077	0.022466	0.067048	0.892959	1495	3	-0.20077
NBAS	10	0.19079	0.48756	0.999997	9218	5	-5.0153	0.022515	0.069203	0.896757	1496	3	-5.0153
AC110781	8	0.067454	0.22607	0.951324	4935	3	0.2324	0.022574	0.067326	0.893085	1497	4	0.2324
HHATL	8	0.44806	0.73296	0.999997	14614	3	-5.2113	0.022577	0.067334	0.893085	1498	3	-5.2113
NDN	10	0.60484	0.86299	0.999997	16769	4	-1.0843	0.022582	0.069361	0.896757	1499	3	-1.0843
TCF20	9	0.67927	0.88653	0.999997	17575	4	-5.3427	0.022592	0.067529	0.893085	1500	3	-5.3427
AC138647	10	0.10295	0.32588	0.984525	6418	3	0.29148	0.02261	0.069419	0.896757	1501	4	0.29148
KCNJ14	9	0.58142	0.83554	0.999997	16472	3	-4.6805	0.02263	0.067629	0.893085	1502	4	-4.6805
HUS1B	10	0.1261	0.37407	0.999997	7306	7	-5.7407	0.02264	0.069498	0.896757	1503	3	-5.7407
ARID5B	8	0.61932	0.85045	0.999997	16934	3	-4.8102	0.022642	0.067512	0.893085	1504	3	-4.8102
TMED10	10	0.37066	0.70122	0.999997	13329	5	-5.6798	0.022647	0.069523	0.896757	1505	2	-5.6798
TREX1	9	0.21607	0.51078	0.999997	9920	3	-2.953	0.022684	0.067769	0.8933	1506	4	-2.953
KIAA1586	10	0.46605	0.77176	0.999997	14902	5	-5.6445	0.022724	0.069694	0.896757	1507	3	-5.6445
STK36	10	0.041134	0.17021	0.910238	3575	6	-5.2729	0.022729	0.069709	0.896757	1508	3	-5.2729
CCL20	9	0.062258	0.22262	0.95059	4705	4	-5.621	0.022765	0.06799	0.893625	1509	2	-5.621
TEAD3	8	0.66587	0.87318	0.999997	17438	3	-4.6194	0.022765	0.067846	0.893625	1510	2	-4.6194
BHLHA9	6	0.01573	0.067399	0.775178	1920	4	-7.1454	0.022771	0.057667	0.884441	1511	1	-7.1454
AC018470	9	0.15937	0.42062	0.999997	8352	4	-4.788	0.022773	0.068012	0.893625	1512	4	-4.788
LRRC9	8	0.30779	0.60805	0.999997	12073	4	-2.8471	0.022798	0.067931	0.893625	1513	3	-2.8471
AVL9	9	0.31922	0.63156	0.999997	12291	2	-4.4508	0.022813	0.068109	0.894318	1514	2	-4.4508
CNGA2	9	0.55503	0.82146	0.999997	16115	4	-5.2794	0.022895	0.068307	0.894736	1515	4	-5.2794
OR10H3	9	0.59938	0.84489	0.999997	16710	2	-0.43957	0.02292	0.068368	0.894736	1516	4	-0.43957
MYO18B	9	0.020165	0.095342	0.827329	2257	4	-6.055	0.022926	0.068379	0.894736	1517	3	-6.055
OR4F4	3	0.9537	0.95401	0.999997	19922	0	1.5344	0.022961	0.043436	0.848408	1518	2	1.5344
ODAM	10	0.11271	0.34667	0.985935	6822	4	-3.2401	0.022984	0.070324	0.897185	1519	4	-3.2401
GPS2	8	0.21607	0.49378	0.999997	9916	3	-4.445	0.023001	0.068464	0.894736	1520	3	-4.445
OR1D2	9	0.090804	0.29601	0.981149	5958	3	-5.4175	0.023059	0.068684	0.894736	1521	3	-5.4175
MPDZ	10	0.010477	0.058072	0.766628	1424	5	-6.0366	0.023074	0.070546	0.897185	1522	3	-6.0366
CLDN20	7	0.29987	0.57908	0.999997	11918	4	-5.4239	0.023078	0.061699	0.889914	1523	2	-5.4239
GJD4	9	0.21211	0.5048	0.999997	9818	3	0.57329	0.023091	0.068766	0.894736	1524	4	0.57329
C1orf216	9	0.18589	0.46407	0.999997	9100	6	-5.4239	0.023101	0.068793	0.894736	1525	2	-5.4239
NLRX1	10	0.23297	0.54292	0.999997	10389	5	-2.8979	0.023125	0.070667	0.897185	1526	4	-2.8979
EEA1	10	0.67235	0.8935	0.999997	17508	4	-5.2779	0.023128	0.070674	0.897185	1527	3	-5.2779
ARHGDIA	8	0.26379	0.55492	0.999997	11138	3	-0.84801	0.023128	0.068797	0.894736	1528	4	-0.84801
RMND5B	8	0.30514	0.60492	0.999997	12025	4	-5.2226	0.023129	0.068799	0.894736	1529	3	-5.2226
NUPR1	10	0.45626	0.76493	0.999997	14748	4	-2.4315	0.02317	0.070784	0.897185	1530	4	-2.4315
ARMS2	10	0.98397	0.9946	0.999997	20151	2	-0.31952	0.023185	0.070822	0.897185	1531	4	-0.31952
PIK3C2B	9	0.12187	0.35481	0.990892	7175	6	-6.4369	0.023197	0.069046	0.896757	1532	1	-6.4369
NEDD4L	7	0.48772	0.7547	0.999997	15237	3	0.075686	0.023258	0.062054	0.889914	1533	2	0.075686
CYP2B6	10	0.024033	0.11103	0.856986	2508	6	-6.0567	0.023264	0.071025	0.897185	1534	3	-6.0567
C1QB	9	0.0083387	0.044562	0.725855	1224	5	-6.5771	0.023274	0.069249	0.896757	1535	3	-6.5771
FKBPL	10	0.10462	0.32947	0.984525	6490	7	-6.0735	0.023315	0.071143	0.897185	1536	2	-6.0735
DSTN	8	0.458	0.74019	0.999997	14768	4	-5.6367	0.023343	0.069348	0.896757	1537	1	-5.6367
NAP1L6	9	0.065897	0.23244	0.952746	4862	5	-6.6169	0.02336	0.069467	0.896757	1538	3	-6.6169
PTMS	6	0.34906	0.62038	0.999997	12912	2	-3.7358	0.023381	0.058974	0.889914	1539	1	-3.7358
AC096582	9	0.07718	0.26228	0.963894	5383	2	0.50226	0.0234	0.06957	0.896757	1540	4	0.50226
REG3A	10	0.11621	0.35397	0.990477	6951	4	-5.6155	0.023448	0.071478	0.898482	1541	1	-5.6155
TFDP3	7	0.53692	0.78466	0.999997	15893	2	-4.3998	0.02345	0.062442	0.889914	1542	3	-4.3998
TMEM5	9	0.65464	0.87385	0.999997	17343	4	-5.8077	0.023477	0.069763	0.896757	1543	2	-5.8077
KLHL12	9	0.44017	0.7421	0.999997	14504	3	-4.931	0.023486	0.06979	0.896757	1544	2	-4.931
C1orf147	8	0.36131	0.66853	0.999997	13140	5	-5.4995	0.023492	0.069679	0.896757	1545	1	-5.4995
GPR75	9	0.30822	0.62065	0.999997	12086	2	-0.087381	0.023521	0.069889	0.896924	1546	3	-0.087381
CTH	10	0.79761	0.94345	0.999997	18701	4	-2.2904	0.02356	0.07174	0.898482	1547	4	-2.2904
RTN1	9	0.26583	0.57797	0.999997	11186	4	-3.0597	0.023582	0.070046	0.897185	1548	3	-3.0597
NOP56	8	0.84787	0.94943	0.999997	19110	2	-5.8525	0.023642	0.069964	0.897185	1549	1	-5.8525
MYH1	9	0.18679	0.46549	0.999997	9116	5	-5.8721	0.023662	0.07023	0.897185	1550	2	-5.8721
DNAJC6	8	0.78369	0.92122	0.999997	18597	3	-5.3698	0.023677	0.070034	0.897185	1551	3	-5.3698
RGL1	10	0.014719	0.075397	0.787709	1834	4	-1.2367	0.023755	0.072216	0.898482	1552	4	-1.2367
OBP2B	8	0.48876	0.76188	0.999997	15255	3	-3.4194	0.023776	0.070232	0.897185	1553	3	-3.4194
SPAG7	10	0.37541	0.70613	0.999997	13428	4	-3.922	0.023895	0.072569	0.898482	1554	4	-3.922
IL11	9	0.21742	0.51279	0.999997	9952	3	-4.1567	0.023896	0.070828	0.897185	1555	4	-4.1567
GABRB1	10	0.27465	0.59428	0.999997	11378	5	-5.6062	0.023916	0.072616	0.898482	1556	3	-5.6062
CRIPAK	8	0.79694	0.92687	0.999997	18695	3	-2.681	0.023924	0.070509	0.897185	1557	2	-2.681
IGHV3-7	8	0.032975	0.1354	0.884439	3074	5	-6.0709	0.023941	0.070543	0.897185	1558	2	-6.0709
SLC25A40	7	0.55091	0.79213	0.999997	16067	3	-4.6421	0.023952	0.063464	0.889914	1559	2	-4.6421
ZNF646	9	0.0596	0.21536	0.94829	4556	4	-4.6706	0.023954	0.070987	0.897185	1560	4	-4.6706
DHRS12	10	0.056187	0.21734	0.94829	4384	7	-6.1783	0.023954	0.072708	0.898482	1561	2	-6.1783
ADAM22	10	0.21246	0.51647	0.999997	9828	5	-5.3852	0.023974	0.072759	0.898482	1562	2	-5.3852
GRK4	9	0.92912	0.97844	0.999997	19735	2	-3.7149	0.023995	0.07109	0.897185	1563	4	-3.7149
RP11-434D12	7	0.014147	0.062653	0.770053	1779	6	-7.1013	0.024013	0.063579	0.889914	1564	1	-7.1013
TACO1	9	0.95181	0.98368	0.999997	19907	2	-2.7174	0.024062	0.071264	0.897605	1565	1	-2.7174
EPAS1	10	0.017917	0.08792	0.812675	2099	4	-5.5718	0.024133	0.073135	0.898482	1566	3	-5.5718
RAB12	10	0.53843	0.8208	0.999997	15910	3	-5.3241	0.024142	0.073161	0.898482	1567	1	-5.3241
RPLP1	6	0.75638	0.8827	0.999997	18382	2	-4.5038	0.024182	0.06073	0.889914	1568	2	-4.5038
HILPDA	6	0.36689	0.6337	0.999997	13257	2	-5.7442	0.024183	0.060732	0.889914	1569	1	-5.7442
TAS2R7	8	0.52227	0.78539	0.999997	15708	4	-5.6536	0.024197	0.07104	0.897185	1570	1	-5.6536
AC002365	8	0.9273	0.97182	0.999997	19718	2	-4.5854	0.024201	0.071048	0.897185	1571	3	-4.5854
HECTD3	7	0.41888	0.69368	0.999997	14170	4	-6.4724	0.024212	0.063985	0.889914	1572	3	-6.4724
FAM19A3	9	0.69692	0.89561	0.999997	17755	1	-0.75937	0.024213	0.071662	0.898482	1573	4	-0.75937
LZTR1	10	0.7303	0.91661	0.999997	18104	4	-5.4746	0.024222	0.073369	0.898482	1574	2	-5.4746
INHBB	10	0.063661	0.23585	0.952746	4769	4	-5.0997	0.024233	0.073401	0.898482	1575	3	-5.0997
IREB2	8	0.11768	0.33913	0.984943	7003	3	-4.7461	0.024247	0.071138	0.897185	1576	3	-4.7461
UACA	10	0.0021297	0.01413	0.59	460	8	-6.2632	0.024302	0.073562	0.898482	1577	2	-6.2632
PPID	9	0.24384	0.55121	0.999997	10682	4	-5.9243	0.024303	0.071896	0.898482	1578	1	-5.9243
NDNF	7	0.8238	0.92832	0.999997	18915	1	-3.4617	0.024312	0.064174	0.889914	1579	2	-3.4617
USP12	8	0.18574	0.45247	0.999997	9097	5	-6.4157	0.024368	0.071371	0.898396	1580	2	-6.4157
PIP4K2A	10	0.040215	0.16714	0.909644	3516	5	-5.0952	0.024403	0.073811	0.898482	1581	3	-5.0952
KIF26A	10	0.017774	0.087369	0.8102	2085	3	-5.1642	0.024409	0.073824	0.898482	1582	2	-5.1642
KRAS	10	0.43371	0.74893	0.999997	14405	3	-2.4665	0.024462	0.073957	0.898482	1583	3	-2.4665
GYS1	7	0.82923	0.93007	0.999997	18966	1	-5.1379	0.024467	0.064481	0.889914	1584	3	-5.1379
OR7G2	6	0.19835	0.43206	0.999997	9453	3	-2.2591	0.024494	0.061397	0.889914	1585	3	-2.2591
OR2T12	9	0.78229	0.93141	0.999997	18585	3	-0.056558	0.024495	0.072391	0.898482	1586	4	-0.056558
CDC40	7	0.916	0.96289	0.999997	19643	2	-4.0639	0.024499	0.064545	0.889914	1587	1	-4.0639
TRAV6	7	0.57529	0.80526	0.999997	16382	3	-5.5806	0.024499	0.064545	0.889914	1588	1	-5.5806
AKR7A3	9	0.19867	0.48412	0.999997	9458	5	-6.2148	0.024543	0.072518	0.898482	1589	2	-6.2148
LYZL6	7	0.67624	0.8596	0.999997	17547	1	-0.81527	0.024558	0.064659	0.889914	1590	2	-0.81527
COPG1	9	0.79983	0.93689	0.999997	18716	3	-5.9911	0.024562	0.07256	0.898482	1591	2	-5.9911
SFN	10	0.071004	0.25351	0.963207	5107	6	-5.6562	0.024569	0.074235	0.898482	1592	3	-5.6562
NAGK	10	0.85588	0.962	0.999997	19179	3	-4.1772	0.024622	0.074352	0.898482	1593	3	-4.1772
AKAP1	10	0.6295	0.87658	0.999997	17060	3	-4.3968	0.024622	0.074352	0.898482	1594	1	-4.3968
SGK223	9	0.28982	0.60237	0.999997	11706	5	-5.1301	0.024643	0.072764	0.898482	1595	3	-5.1301
FAM135A	10	0.57449	0.84405	0.999997	16379	4	-4.7239	0.024655	0.074426	0.898482	1596	4	-4.7239
EYA2	9	0.25302	0.56425	0.999997	10928	3	-1.3836	0.024673	0.072847	0.898482	1597	4	-1.3836
NECAP1	7	0.54956	0.79139	0.999997	16054	2	-0.19416	0.024693	0.064926	0.889914	1598	2	-0.19416
SUDS3	10	0.9282	0.98139	0.999997	19728	2	-2.9059	0.0247	0.074532	0.898482	1599	4	-2.9059
FPR3	9	0.72808	0.91146	0.999997	18076	3	-0.28751	0.024744	0.073025	0.898482	1600	3	-0.28751
LY6G5C	9	0.60223	0.8464	0.999997	16738	4	-3.6066	0.024751	0.073043	0.898482	1601	3	-3.6066
IGKV2D-40	9	0.81573	0.94195	0.999997	18853	3	-3.9238	0.024775	0.073102	0.898482	1602	3	-3.9238
CA8	10	0.49163	0.78941	0.999997	15295	4	-4.8392	0.024788	0.07474	0.898482	1603	3	-4.8392
PROB1	9	0.90414	0.9725	0.999997	19542	3	-4.6706	0.024794	0.073148	0.898482	1604	4	-4.6706
TTC32	9	0.83107	0.94688	0.999997	18982	3	0.56261	0.024827	0.073231	0.898482	1605	4	0.56261
ANXA13	10	0.4361	0.7506	0.999997	14439	5	-5.5788	0.024868	0.074936	0.898482	1606	3	-5.5788
HERPUD2	9	0.10213	0.31799	0.984201	6377	2	-0.36479	0.024881	0.073367	0.898482	1607	4	-0.36479
IL1F10	9	0.86125	0.95709	0.999997	19228	2	-0.37025	0.024922	0.073452	0.898482	1608	4	-0.37025
HELB	9	0.66739	0.88046	0.999997	17463	3	0.53475	0.024946	0.073517	0.898482	1609	3	0.53475
ASPRV1	8	0.18271	0.44819	0.999997	9033	2	-1.0717	0.024953	0.072523	0.898482	1610	3	-1.0717
LRRC8B	10	0.77346	0.93388	0.999997	18522	2	-1.3569	0.024963	0.075168	0.898482	1611	4	-1.3569
KRTAP9-6	10	0.753	0.92572	0.999997	18346	4	-4.9985	0.024971	0.075185	0.898482	1612	4	-4.9985
ZNF318	9	0.30246	0.61503	0.999997	11972	4	-4.7752	0.024975	0.073594	0.898482	1613	2	-4.7752
ENO3	9	0.99919	0.99917	0.999997	20359	0	-0.85856	0.025006	0.073676	0.898482	1614	4	-0.85856
PRRT2	8	0.21882	0.49741	0.999997	9994	4	-5.0829	0.025051	0.072705	0.898482	1615	1	-5.0829
LMAN2	9	0.10531	0.32408	0.984525	6519	5	-5.9102	0.025119	0.073958	0.898482	1616	2	-5.9102
EBAG9	9	0.78448	0.9321	0.999997	18602	1	-0.7821	0.025155	0.074054	0.898482	1617	4	-0.7821
C1orf86	10	0.21947	0.5256	0.999997	10014	3	-5.0046	0.025164	0.075635	0.901106	1618	4	-5.0046
MTG2	7	0.016867	0.072248	0.781366	2009	4	-6.0938	0.025172	0.065902	0.889914	1619	2	-6.0938
ZNF8	9	0.61691	0.85411	0.999997	16907	2	-2.0552	0.025194	0.074158	0.898482	1620	4	-2.0552
LDHAL6B	8	0.34532	0.65102	0.999997	12850	4	-5.4932	0.025204	0.072979	0.898482	1621	2	-5.4932
NUTM2B	7	0.01679	0.071986	0.781366	2002	5	-6.4221	0.025209	0.065977	0.889914	1622	1	-6.4221
PBLD	8	0.29556	0.59357	0.999997	11839	5	-5.7916	0.025212	0.072996	0.898482	1623	2	-5.7916
TTC13	10	0.30371	0.6283	0.999997	11994	4	-2.3728	0.025213	0.075753	0.901106	1624	4	-2.3728
MICU1	9	0.10108	0.31597	0.984201	6354	3	-2.0717	0.025221	0.074217	0.898482	1625	3	-2.0717
CS	10	0.99938	0.99939	0.999997	20364	0	-0.78676	0.025251	0.07585	0.901106	1626	4	-0.78676
CREB1	10	0.23243	0.54223	0.999997	10379	6	-5.5377	0.025252	0.075853	0.901106	1627	3	-5.5377
SBNO2	9	0.10695	0.32721	0.984525	6583	4	-4.7108	0.025258	0.074313	0.898482	1628	2	-4.7108
TARS	8	0.40187	0.69928	0.999997	13870	4	-5.2023	0.025268	0.073099	0.898482	1629	2	-5.2023
TTC8	9	0.014818	0.073593	0.785091	1838	8	-6.3881	0.025311	0.074437	0.898482	1630	1	-6.3881
TRAPPC6B	9	0.20172	0.48884	0.999997	9542	4	-4.9975	0.025358	0.074555	0.898482	1631	3	-4.9975
PRR25	10	0.49163	0.78941	0.999997	15291	4	-5.8205	0.025369	0.076119	0.901106	1632	2	-5.8205
MAS1L	8	0.59021	0.8312	0.999997	16591	2	-4.7608	0.025393	0.073345	0.898482	1633	1	-4.7608
SBNO1	9	0.35734	0.66786	0.999997	13080	5	-5.4624	0.025394	0.07464	0.898482	1634	3	-5.4624
PLEKHO1	9	0.44437	0.74566	0.999997	14570	1	-0.046407	0.025421	0.074716	0.898482	1635	4	-0.046407
UAP1L1	9	0.1585	0.41915	0.999997	8335	6	-5.9227	0.025503	0.07491	0.898482	1636	1	-5.9227
C17orf104	9	0.34341	0.65477	0.999997	12797	4	-4.3046	0.025504	0.074912	0.898482	1637	3	-4.3046
CSN3	8	0.35435	0.66091	0.999997	13007	4	-4.3621	0.02551	0.073569	0.898482	1638	3	-4.3621
MURC	10	0.10577	0.33187	0.984525	6538	4	-3.8801	0.025528	0.076491	0.901106	1639	3	-3.8801
PPP1R9B	9	0.7342	0.91453	0.999997	18161	4	-4.8835	0.02554	0.074995	0.898482	1640	2	-4.8835
SNRPD1	7	0.6932	0.86895	0.999997	17720	3	-5.7228	0.025545	0.06667	0.891979	1641	1	-5.7228
GTF3C3	7	0.93349	0.97117	0.999997	19763	2	-4.9886	0.025549	0.066678	0.891979	1642	2	-4.9886
FAM160A2	9	0.89491	0.96909	0.999997	19483	3	-4.8855	0.025559	0.075042	0.898482	1643	3	-4.8855
HMHA1	9	0.31979	0.63211	0.999997	12304	4	-6.0169	0.025577	0.075094	0.898482	1644	2	-6.0169
RP11-410N8	10	0.72741	0.91546	0.999997	18062	1	0.31637	0.025588	0.076646	0.901106	1645	4	0.31637
KIAA1683	6	0.13735	0.34425	0.985847	7653	2	-3.0253	0.025609	0.063776	0.889914	1646	2	-3.0253
C1QTNF9B	7	0.82953	0.93017	0.999997	18975	2	0.61749	0.025619	0.066815	0.891979	1647	3	0.61749
WAC	9	0.20754	0.49783	0.999997	9715	5	-6.5368	0.025623	0.075211	0.898482	1648	2	-6.5368
RCSD1	9	0.040392	0.16019	0.902891	3539	6	-6.2725	0.025678	0.075354	0.899128	1649	2	-6.2725
CMAS	10	0.91494	0.97745	0.999997	19633	3	0.34354	0.025725	0.076985	0.901106	1650	3	0.34354
PSMC2	7	0.13294	0.34842	0.987194	7518	4	-5.0728	0.025769	0.06713	0.892959	1651	2	-5.0728
GPR143	10	0.15068	0.42209	0.999997	8084	7	-6.099	0.025821	0.077227	0.901106	1652	1	-6.099
KRTAP10-11	9	0.16766	0.43454	0.999997	8606	4	-2.1363	0.025833	0.075761	0.901106	1653	2	-2.1363
MCM8	9	0.44134	0.74313	0.999997	14523	5	-5.0728	0.025843	0.07579	0.901106	1654	2	-5.0728
C3orf72	7	0.82248	0.92791	0.999997	18905	1	-0.7513	0.025852	0.067298	0.893085	1655	2	-0.7513
CHUK	8	0.29157	0.58888	0.999997	11740	4	-4.9262	0.025862	0.074213	0.898482	1656	2	-4.9262
CHST4	10	0.21039	0.51371	0.999997	9783	6	-5.7598	0.025878	0.077363	0.901106	1657	2	-5.7598
IFFO2	9	0.083176	0.27762	0.968486	5653	3	-4.7185	0.025886	0.075906	0.901106	1658	1	-4.7185
CHST2	10	0.22782	0.53642	0.999997	10241	4	-3.0929	0.025901	0.077425	0.901106	1659	4	-3.0929
ZBTB7C	8	0.20743	0.48221	0.999997	9708	3	-5.7679	0.025904	0.074298	0.898482	1660	2	-5.7679
PHB2	5	0.93696	0.9454	0.999997	19795	1	-5.7228	0.025922	0.063728	0.889914	1661	1	-5.7228
ALKBH4	8	0.39633	0.6953	0.999997	13773	4	-4.7398	0.025932	0.074357	0.898482	1662	2	-4.7398
TRPV2	9	0.38389	0.69252	0.999997	13576	5	-5.2693	0.025934	0.076027	0.901106	1663	3	-5.2693
NT5C	9	0.83236	0.94731	0.999997	18992	3	-1.2611	0.025943	0.076051	0.901106	1664	4	-1.2611
CERS6	8	0.85051	0.95061	0.999997	19141	1	-2.508	0.02599	0.074464	0.898482	1665	2	-2.508
UCP3	10	0.14057	0.40256	0.999997	7758	4	-4.5928	0.026043	0.077775	0.901134	1666	4	-4.5928
RSPH1	9	0.6146	0.85292	0.999997	16892	4	-5.1744	0.026078	0.076374	0.901106	1667	4	-5.1744
CYB561D1	10	0.040084	0.16671	0.909644	3507	5	-5.6607	0.026093	0.077893	0.901256	1668	2	-5.6607
FAM96B	8	0.12558	0.35547	0.990892	7287	4	-5.8626	0.026118	0.074708	0.898482	1669	1	-5.8626
KCNIP4	8	0.099955	0.30119	0.982853	6315	4	-5.4048	0.02616	0.074781	0.898482	1670	2	-5.4048
RFESD	8	0.46355	0.74415	0.999997	14858	2	-1.6039	0.026166	0.074798	0.898482	1671	3	-1.6039
PHPT1	9	0.49779	0.7901	0.999997	15377	5	-4.8991	0.026174	0.076617	0.901106	1672	4	-4.8991
DDX21	9	0.87036	0.96028	0.999997	19281	2	-5.4512	0.026174	0.076617	0.901106	1673	2	-5.4512
ZNF136	10	0.041	0.16979	0.910238	3571	7	-6.0407	0.026189	0.078133	0.901256	1674	3	-6.0407
XXYLT1	9	0.49513	0.78796	0.999997	15345	5	-5.1188	0.026198	0.07667	0.901106	1675	4	-5.1188
TUBB6	9	0.5446	0.81583	0.999997	15987	3	-5.4653	0.026237	0.07678	0.901106	1676	4	-5.4653
TRIM42	8	0.046419	0.17304	0.913597	3880	4	-5.5379	0.026246	0.074948	0.898482	1677	1	-5.5379
C20ORF135	9	0.47481	0.77145	0.999997	15048	1	-3.7734	0.026314	0.076976	0.901106	1678	3	-3.7734
TAAR9	10	0.049078	0.19589	0.930077	4038	8	-6.4878	0.026327	0.078477	0.904131	1679	2	-6.4878
RGS5	9	0.12345	0.35773	0.992502	7219	4	-4.4183	0.026349	0.077064	0.901106	1680	3	-4.4183
TBPL1	4	0.64075	0.77683	0.999997	17185	2	-1.605	0.026362	0.054649	0.883565	1681	2	-1.605
PARPBP	7	0.70992	0.87816	0.999997	17888	2	0.77688	0.026417	0.068451	0.894736	1682	3	0.77688
FAM209A	9	0.47481	0.77145	0.999997	15043	3	-5.5782	0.026431	0.077281	0.901106	1683	3	-5.5782
AGRP	9	0.30642	0.61893	0.999997	12039	5	-5.0009	0.026456	0.077348	0.901106	1684	4	-5.0009
UCP2	9	0.35736	0.66788	0.999997	13081	4	-2.686	0.0265	0.077469	0.901106	1685	4	-2.686
ZNF37A	9	0.55628	0.82212	0.999997	16137	2	-4.9175	0.026542	0.077572	0.901106	1686	4	-4.9175
OR3A1	7	0.60977	0.82365	0.999997	16839	2	-4.3035	0.026571	0.068764	0.894736	1687	2	-4.3035
ASMT	9	0.066819	0.23496	0.952746	4916	4	-0.052562	0.026591	0.077701	0.901134	1688	3	-0.052562
ADRB3	9	0.68659	0.89031	0.999997	17643	4	0.046208	0.026623	0.077771	0.901134	1689	4	0.046208
TRIM65	10	0.38514	0.71376	0.999997	13604	3	-4.429	0.026628	0.079184	0.907114	1690	3	-4.429
AMICA1	6	0.20998	0.44791	0.999997	9772	3	-5.2014	0.026661	0.066028	0.889914	1691	2	-5.2014
TEX35	9	0.41273	0.71822	0.999997	14067	1	-1.0126	0.026669	0.077887	0.901256	1692	4	-1.0126
HOXC4	7	0.25605	0.53403	0.999997	10979	4	-5.8427	0.026772	0.06917	0.896757	1693	2	-5.8427
C1orf192	10	0.052632	0.20711	0.943184	4204	5	-4.7996	0.026838	0.07968	0.907114	1694	3	-4.7996
DEFB127	9	0.98688	0.99391	0.999997	20174	1	-3.4255	0.026927	0.078546	0.904409	1695	4	-3.4255
KCNJ16	8	0.92323	0.97049	0.999997	19690	1	-4.5797	0.026941	0.076262	0.901106	1696	2	-4.5797
DENND4C	10	0.81341	0.94973	0.999997	18832	2	-4.2045	0.026952	0.079951	0.907114	1697	3	-4.2045
SHC3	9	0.55529	0.8216	0.999997	16126	4	-5.6626	0.026973	0.078661	0.90467	1698	2	-5.6626
GORASP2	9	0.8843	0.96524	0.999997	19393	3	-5.0611	0.026989	0.078701	0.90467	1699	1	-5.0611
POU2AF1	9	0.015864	0.077939	0.788973	1927	5	-6.1391	0.026998	0.078727	0.90467	1700	3	-6.1391
PHLDB3	7	0.5407	0.78665	0.999997	15945	3	-6.1097	0.027017	0.06967	0.896757	1701	3	-6.1097
AK5	10	0.54224	0.82334	0.999997	15966	5	-5.6224	0.027017	0.080104	0.907114	1702	4	-5.6224
TMEM8B	9	0.019174	0.091698	0.82013	2187	4	-0.7821	0.027023	0.078791	0.90467	1703	3	-0.7821
TNFAIP8	8	0.34532	0.65102	0.999997	12851	2	-3.1581	0.027024	0.076434	0.901106	1704	2	-3.1581
KLHL28	6	0.36545	0.63263	0.999997	13222	3	-5.0012	0.027033	0.066848	0.891979	1705	1	-5.0012
C16orf47	7	0.72282	0.88536	0.999997	18020	3	-0.29969	0.027059	0.069761	0.896757	1706	3	-0.29969
C3	10	0.41892	0.73843	0.999997	14173	3	-3.3085	0.027067	0.080214	0.907114	1707	3	-3.3085
PLCD1	9	0.30508	0.61762	0.999997	12024	4	-1.2714	0.02708	0.078933	0.904783	1708	4	-1.2714
POTEC	7	0.63702	0.83837	0.999997	17137	2	-4.5428	0.027125	0.069891	0.896924	1709	3	-4.5428
IZUMO2	9	0.19911	0.48477	0.999997	9477	2	-4.3252	0.027216	0.079275	0.907114	1710	3	-4.3252
STPG1	10	0.58092	0.84807	0.999997	16460	3	-4.842	0.027265	0.080708	0.907114	1711	2	-4.842
CPSF4L	6	0.52475	0.74955	0.999997	15739	2	-2.0056	0.027269	0.067339	0.893085	1712	3	-2.0056
GRAP	7	0.64952	0.84514	0.999997	17296	2	-3.762	0.027305	0.07027	0.897185	1713	3	-3.762
GRIK2	7	0.49819	0.76362	0.999997	15393	1	-4.7709	0.027327	0.070317	0.897185	1714	2	-4.7709
DNAJC27	10	0.33598	0.66441	0.999997	12636	5	-5.4975	0.027339	0.080883	0.907114	1715	2	-5.4975
TPM3	8	0.03963	0.15499	0.897073	3484	4	-4.8973	0.027359	0.077066	0.901106	1716	3	-4.8973
LRRC3C	10	0.069989	0.25113	0.961695	5065	5	-5.3237	0.027384	0.080988	0.907114	1717	4	-5.3237
B3GNT2	6	0.36333	0.63103	0.999997	13185	2	-2.2335	0.027417	0.067665	0.893085	1718	1	-2.2335
RBM46	9	0.55777	0.82291	0.999997	16154	3	-5.5563	0.02742	0.079816	0.907114	1719	2	-5.5563
PARK7	10	0.77346	0.93388	0.999997	18523	2	-2.7669	0.027422	0.081071	0.907114	1720	3	-2.7669
TRIM60	8	0.15478	0.40829	0.999997	8204	2	-4.604	0.027439	0.077216	0.901106	1721	1	-4.604
CCDC93	9	0.21091	0.503	0.999997	9796	3	-4.8612	0.027454	0.079893	0.907114	1722	3	-4.8612
ECE1	10	0.28669	0.60848	0.999997	11652	1	-0.47094	0.027464	0.081167	0.907114	1723	2	-0.47094
PLD6	9	0.64844	0.87061	0.999997	17272	4	-5.3026	0.027492	0.079989	0.907114	1724	1	-5.3026
TDRD12	10	0.46746	0.77272	0.999997	14926	4	-5.0258	0.027498	0.081247	0.907114	1725	1	-5.0258
BCAS3	10	0.26511	0.58271	0.999997	11176	5	-3.2516	0.027561	0.081402	0.907114	1726	4	-3.2516
MAPK6	7	0.87954	0.94761	0.999997	19351	2	-2.7564	0.027589	0.070846	0.897185	1727	3	-2.7564
NAV3	10	0.36798	0.69851	0.999997	13271	2	-2.241	0.027591	0.081471	0.907114	1728	3	-2.241
ADAM21	8	0.5342	0.79351	0.999997	15862	3	-5.4417	0.027609	0.077538	0.901106	1729	2	-5.4417
HPS3	8	0.57697	0.82246	0.999997	16405	4	-6.343	0.027609	0.077538	0.901106	1730	1	-6.343
ZNF829	8	0.89893	0.96343	0.999997	19508	2	-4.9871	0.027632	0.077591	0.901106	1731	3	-4.9871
PPP1R32	9	0.5644	0.82652	0.999997	16241	3	-5.4416	0.027707	0.08052	0.907114	1732	2	-5.4416
VWDE	9	0.82908	0.94624	0.999997	18962	2	-0.46014	0.02772	0.080549	0.907114	1733	3	-0.46014
ACSM1	10	0.49163	0.78941	0.999997	15296	4	-5.0442	0.027737	0.081834	0.907114	1734	3	-5.0442
LRRC70	10	0.46009	0.76762	0.999997	14802	4	-5.4695	0.027742	0.081851	0.907114	1735	3	-5.4695
AMER1	9	0.040061	0.15917	0.902891	3505	2	-0.81282	0.027744	0.080612	0.907114	1736	3	-0.81282
PRPF8	7	0.42012	0.69482	0.999997	14185	2	-3.271	0.027762	0.071209	0.897456	1737	3	-3.271
SAT1	9	0.0075646	0.040933	0.721289	1127	7	-6.4536	0.027815	0.080786	0.907114	1738	2	-6.4536
CCR10	8	0.81009	0.93263	0.999997	18805	1	-2.3545	0.027816	0.077928	0.901256	1739	3	-2.3545
CTD-3193O13	6	0.45158	0.69621	0.999997	14674	2	-3.3231	0.027843	0.068582	0.894736	1740	2	-3.3231
PCDHB14	9	0.33343	0.64532	0.999997	12589	5	-6.1161	0.027851	0.080868	0.907114	1741	1	-6.1161
GALNT9	10	0.538	0.82053	0.999997	15907	3	0.32637	0.02786	0.082137	0.907114	1742	4	0.32637
ARL5A	10	0.021396	0.10121	0.845568	2329	4	-5.1459	0.027865	0.082148	0.907114	1743	2	-5.1459
SMYD4	8	0.1385	0.3814	0.999997	7690	5	-5.7753	0.027891	0.078061	0.901256	1744	2	-5.7753
TTC23	6	0.98954	0.98962	0.999997	20211	0	1.0179	0.027892	0.068678	0.894736	1745	3	1.0179
SYNGR4	9	0.14411	0.39448	0.999997	7891	3	-4.1068	0.027899	0.08099	0.907114	1746	3	-4.1068
ABCG8	9	0.49139	0.78496	0.999997	15284	5	-5.5384	0.027947	0.081102	0.907114	1747	1	-5.5384
PARVA	10	0.57917	0.84697	0.999997	16437	5	-2.9875	0.027972	0.082411	0.907114	1748	3	-2.9875
C6orf100	10	0.39959	0.72438	0.999997	13839	5	-5.4427	0.028003	0.082487	0.907114	1749	2	-5.4427
RPEL1	10	0.25206	0.56686	0.999997	10893	3	-4.4982	0.028018	0.082517	0.907114	1750	4	-4.4982
IFNAR2	9	0.13816	0.38397	0.999997	7675	6	-6.001	0.028042	0.08135	0.907114	1751	1	-6.001
ZNF165	8	0.44806	0.73296	0.999997	14616	4	-2.7469	0.028068	0.078393	0.903674	1752	3	-2.7469
DCLK2	10	0.34542	0.6747	0.999997	12855	4	-3.2302	0.028081	0.082664	0.907114	1753	3	-3.2302
USP17L21	5	0.33074	0.56195	0.999997	12521	3	-5.3095	0.028114	0.068658	0.894736	1754	2	-5.3095
C4orf3	10	0.25839	0.57461	0.999997	11034	6	-5.3942	0.028129	0.082783	0.907114	1755	2	-5.3942
DTWD2	10	0.80514	0.94645	0.999997	18759	4	-5.6922	0.028139	0.082805	0.907114	1756	3	-5.6922
RYBP	7	0.81413	0.92535	0.999997	18844	1	-5.122	0.02814	0.071969	0.898482	1757	3	-5.122
FEZF2	9	0.85544	0.95514	0.999997	19175	3	-4.7271	0.028142	0.081613	0.907114	1758	3	-4.7271
INSR	9	0.49975	0.79169	0.999997	15412	4	0.20726	0.028217	0.081803	0.907114	1759	4	0.20726
TNRC18	9	0.33433	0.64619	0.999997	12617	3	-5.3583	0.028234	0.081842	0.907114	1760	1	-5.3583
ZNF345	8	0.33207	0.6361	0.999997	12559	2	-3.7051	0.028265	0.078776	0.90467	1761	3	-3.7051
PCNT	7	0.30713	0.58637	0.999997	12052	4	-5.1797	0.028327	0.072331	0.898482	1762	2	-5.1797
BX842679	9	0.056083	0.20567	0.943184	4381	3	-5.393	0.028328	0.082088	0.907114	1763	3	-5.393
EXOSC10	8	0.51896	0.78306	0.999997	15645	2	-4.3074	0.028332	0.078894	0.904783	1764	1	-4.3074
TTBK2	10	0.37474	0.70544	0.999997	13404	6	-5.7856	0.028345	0.083305	0.907114	1765	4	-5.7856
CTD-2140B24	10	0.034233	0.14698	0.888638	3157	5	-6.1876	0.028357	0.083341	0.907114	1766	4	-6.1876
RHD	10	0.51928	0.80812	0.999997	15657	3	-4.8043	0.028386	0.083409	0.907114	1767	4	-4.8043
STS	9	0.36031	0.6707	0.999997	13128	5	-5.2693	0.028401	0.082265	0.907114	1768	1	-5.2693
EVC	9	0.56486	0.82676	0.999997	16251	4	-4.7462	0.028401	0.082265	0.907114	1769	3	-4.7462
AGFG1	10	0.14118	0.40376	0.999997	7783	4	-3.6399	0.028406	0.08346	0.907114	1770	2	-3.6399
ZGPAT	9	0.1504	0.40542	0.999997	8062	6	-5.4479	0.028409	0.082281	0.907114	1771	2	-5.4479
VCX	9	0.27196	0.58421	0.999997	11320	4	-4.4183	0.02843	0.082337	0.907114	1772	4	-4.4183
ZNF226	10	0.1718	0.46123	0.999997	8737	5	-5.2041	0.028455	0.083584	0.907114	1773	2	-5.2041
ARHGAP11A	7	0.026547	0.10475	0.850002	2665	6	-5.7359	0.028473	0.072623	0.898482	1774	1	-5.7359
VAMP4	9	0.86101	0.95701	0.999997	19223	3	-4.0657	0.028489	0.082481	0.907114	1775	3	-4.0657
EME2	7	0.083623	0.25495	0.963207	5663	2	-4.9744	0.028526	0.072732	0.898482	1776	3	-4.9744
SESN1	9	0.21742	0.51279	0.999997	9946	5	-5.8721	0.028549	0.082609	0.907114	1777	3	-5.8721
FHOD3	9	0.87885	0.96333	0.999997	19341	2	-0.18506	0.028559	0.08263	0.907114	1778	4	-0.18506
RNF10	10	0.592	0.855	0.999997	16608	4	-5.3608	0.028562	0.083824	0.907114	1779	2	-5.3608
IL17RA	9	0.21972	0.51617	0.999997	10020	4	-6.2033	0.028569	0.082656	0.907114	1780	1	-6.2033
IGKV1D-12	6	0.96501	0.97097	0.999997	20001	1	0.086979	0.028606	0.070247	0.897185	1781	3	0.086979
GTSE1	9	0.033797	0.13985	0.885184	3127	7	-6.563	0.028664	0.082917	0.907114	1782	1	-6.563
PYGO1	8	0.72142	0.89538	0.999997	18005	2	-3.9561	0.028673	0.079542	0.907114	1783	2	-3.9561
TWF2	9	0.76256	0.92545	0.999997	18438	2	-2.0452	0.028675	0.082948	0.907114	1784	4	-2.0452
RAMP2	7	0.55078	0.79205	0.999997	16065	3	-4.9225	0.028678	0.073024	0.898482	1785	3	-4.9225
CHIC2	8	0.84791	0.94945	0.999997	19111	2	-2.8117	0.028702	0.079589	0.907114	1786	3	-2.8117
NDUFA7	9	0.39852	0.70568	0.999997	13821	3	-3.1123	0.028703	0.083019	0.907114	1787	3	-3.1123
SYNRG	9	0.33226	0.64415	0.999997	12564	2	-1.6175	0.028712	0.083037	0.907114	1788	2	-1.6175
RP11-167N24	7	0.70995	0.87818	0.999997	17890	3	-5.259	0.02874	0.073155	0.898482	1789	2	-5.259
RNF151	8	0.20365	0.47715	0.999997	9608	4	-3.4498	0.028745	0.079661	0.907114	1790	2	-3.4498
DPP8	8	0.72535	0.897	0.999997	18047	3	-4.9648	0.028771	0.079719	0.907114	1791	3	-4.9648
AC011294	1	0.97121	0.9713	0.999997	20061	0	3.641	0.028791	0.028683	0.813656	1792	1	3.641
SPAG9	6	0.47951	0.71653	0.999997	15110	1	-2.3726	0.028823	0.070723	0.897185	1793	1	-2.3726
LINC01119	8	0.27195	0.56496	0.999997	11318	3	-3.9439	0.02883	0.079808	0.907114	1794	3	-3.9439
NDUFS2	10	0.52207	0.80997	0.999997	15692	3	-3.9711	0.02888	0.084589	0.908712	1795	1	-3.9711
PARD6B	10	0.61129	0.86689	0.999997	16855	3	-5.1137	0.028881	0.084591	0.908712	1796	4	-5.1137
TRABD2A	9	0.21841	0.51426	0.999997	9977	6	-5.8272	0.028904	0.083553	0.907114	1797	1	-5.8272
PYDC2	9	0.060504	0.21788	0.94829	4602	3	-2.5159	0.028904	0.083554	0.907114	1798	3	-2.5159
CTD-2410N18	7	0.54187	0.78726	0.999997	15955	3	-5.9581	0.028909	0.073512	0.898482	1799	3	-5.9581
CSN2	9	0.37389	0.68326	0.999997	13388	3	-4.9744	0.028927	0.083615	0.907114	1800	2	-4.9744
HIST1H2BF	8	0.96241	0.98507	0.999997	19984	1	-1.8171	0.028949	0.080031	0.907114	1801	3	-1.8171
PLGRKT	9	0.13061	0.37061	0.997289	7447	3	-0.556	0.028959	0.083692	0.907114	1802	4	-0.556
TKTL1	9	0.36611	0.67622	0.999997	13238	3	-4.089	0.028966	0.083704	0.907114	1803	4	-4.089
MAEL	10	0.52578	0.81246	0.999997	15751	4	-4.545	0.028972	0.084811	0.908712	1804	3	-4.545
GSDMB	10	0.53928	0.82136	0.999997	15928	3	-5.196	0.028987	0.084847	0.908712	1805	1	-5.196
IKZF5	9	0.094025	0.30231	0.984049	6070	2	-4.0046	0.028989	0.083757	0.907114	1806	4	-4.0046
SETD6	9	0.23042	0.53185	0.999997	10314	5	-6.1307	0.028999	0.083783	0.907114	1807	1	-6.1307
C1R	10	0.93923	0.98479	0.999997	19814	2	-1.6442	0.029004	0.084885	0.908712	1808	4	-1.6442
CA12	9	0.15252	0.40904	0.999997	8132	4	-4.7314	0.029011	0.083808	0.907114	1809	4	-4.7314
APOBEC3F	6	0.44888	0.69419	0.999997	14638	3	-5.6546	0.029015	0.071122	0.897185	1810	1	-5.6546
ACVR1B	9	0.41549	0.72064	0.999997	14103	5	-5.0611	0.029037	0.083879	0.907114	1811	4	-5.0611
SERPINI2	9	0.10099	0.3158	0.984201	6345	3	-5.0168	0.029043	0.083896	0.907114	1812	2	-5.0168
STYX	7	0.86861	0.94354	0.999997	19270	2	-4.8331	0.029044	0.073791	0.898482	1813	2	-4.8331
GLCE	10	0.95635	0.98846	0.999997	19938	2	-4.0922	0.029058	0.084995	0.908712	1814	3	-4.0922
TTC30B	8	0.85083	0.95074	0.999997	19145	3	-2.6503	0.029137	0.080348	0.907114	1815	3	-2.6503
OR7A10	7	0.99079	0.99081	0.999997	20221	1	-5.1917	0.029149	0.074002	0.898482	1816	3	-5.1917
MRPS5	9	0.012356	0.06289	0.770053	1609	5	-6.3578	0.029175	0.084206	0.908712	1817	3	-6.3578
ADCY6	10	0.013165	0.06915	0.778633	1701	6	-6.0694	0.029193	0.085313	0.908712	1818	3	-6.0694
VAT1L	10	0.14492	0.41105	0.999997	7913	6	-5.9104	0.029199	0.085331	0.908712	1819	3	-5.9104
C2CD5	10	0.1718	0.46123	0.999997	8736	5	-3.042	0.029293	0.085565	0.908712	1820	4	-3.042
SERBP1	7	0.67337	0.85807	0.999997	17516	3	0.25497	0.029311	0.074321	0.898482	1821	3	0.25497
FGF9	10	0.11588	0.35325	0.990447	6934	5	-4.9698	0.029311	0.085603	0.908712	1822	3	-4.9698
AGBL4	10	0.70013	0.90455	0.999997	17793	4	-4.8533	0.029358	0.085724	0.908712	1823	3	-4.8533
RP11-505K9	6	0.064011	0.19767	0.933109	4786	3	-3.5799	0.029366	0.071868	0.898482	1824	1	-3.5799
CTD-2330K9	9	0.94107	0.98104	0.999997	19829	2	-1.5585	0.02937	0.0847	0.908712	1825	4	-1.5585
SERPINB13	9	0.836	0.94853	0.999997	19021	2	-4.3526	0.029381	0.08473	0.908712	1826	2	-4.3526
MAN2B2	10	0.32853	0.65624	0.999997	12464	3	-3.0592	0.029381	0.085774	0.908712	1827	2	-3.0592
MTFR2	10	0.0036869	0.023021	0.639683	686	5	-5.4847	0.029411	0.085846	0.908712	1828	2	-5.4847
FFAR1	10	0.06268	0.23347	0.952746	4724	6	-6.0788	0.029414	0.085851	0.908712	1829	3	-6.0788
CDK16	9	0.15447	0.41238	0.999997	8191	5	-5.3261	0.02943	0.084847	0.908712	1830	3	-5.3261
HOXC13	10	0.25567	0.57131	0.999997	10968	6	-6.1715	0.029441	0.08591	0.908712	1831	3	-6.1715
PIP4K2C	10	0.84302	0.9589	0.999997	19079	3	-2.682	0.029465	0.08596	0.908712	1832	3	-2.682
ITPRIP	10	0.57198	0.84246	0.999997	16343	3	-2.6447	0.029499	0.086043	0.908991	1833	4	-2.6447
PDZD8	10	0.35112	0.68081	0.999997	12948	3	-5.6089	0.029512	0.086076	0.908991	1834	3	-5.6089
EIF3CL	9	0.3778	0.68685	0.999997	13461	5	-6.1604	0.029573	0.0852	0.908712	1835	1	-6.1604
TAS2R31	8	0.48043	0.75605	0.999997	15136	2	-5.5361	0.029633	0.081278	0.907114	1836	3	-5.5361
ARMCX2	8	0.26731	0.55923	0.999997	11225	5	-5.4147	0.029651	0.081314	0.907114	1837	2	-5.4147
C14orf28	9	0.047813	0.1821	0.918658	3967	4	-4.7499	0.029662	0.085434	0.908712	1838	3	-4.7499
OR2M2	10	0.7017	0.90518	0.999997	17805	1	-2.0447	0.029663	0.086432	0.91054	1839	4	-2.0447
MAGI3	10	0.15557	0.43134	0.999997	8233	5	-5.2648	0.029678	0.086468	0.91054	1840	3	-5.2648
DYRK1B	8	0.28175	0.57704	0.999997	11545	4	-6.3664	0.029693	0.081397	0.907114	1841	2	-6.3664
SERTAD1	10	0.61441	0.86884	0.999997	16884	5	-4.5233	0.029703	0.086526	0.91054	1842	2	-4.5233
2006-09-01	9	0.26067	0.5726	0.999997	11079	3	-2.4213	0.029764	0.085703	0.908712	1843	2	-2.4213
SERPINI1	10	0.53667	0.81964	0.999997	15892	4	-4.9212	0.029839	0.086844	0.91054	1844	3	-4.9212
AL359195	10	0.087544	0.29174	0.977413	5831	4	-1.7358	0.029857	0.086886	0.91054	1845	4	-1.7358
PATL1	9	0.89029	0.9674	0.999997	19449	3	-4.9886	0.029858	0.085927	0.908712	1846	3	-4.9886
C15orf53	9	0.30435	0.61688	0.999997	12006	5	-5.5602	0.02986	0.085931	0.908712	1847	1	-5.5602
CCDC172	5	0.31032	0.54125	0.999997	12128	3	-5.621	0.029868	0.071524	0.898482	1848	1	-5.621
RAB40A	8	0.74072	0.90325	0.999997	18225	3	-2.9978	0.029921	0.081831	0.907114	1849	3	-2.9978
VIP	10	0.17066	0.45918	0.999997	8694	6	-5.6741	0.029923	0.087041	0.91054	1850	4	-5.6741
TMEM209	8	0.63475	0.86054	0.999997	17109	4	-5.903	0.029948	0.081882	0.907114	1851	1	-5.903
STARD10	10	0.16619	0.45104	0.999997	8570	7	-5.9977	0.029967	0.087151	0.91054	1852	2	-5.9977
IFNA2	10	0.0095965	0.053802	0.75094	1366	7	-7.2505	0.029976	0.087174	0.91054	1853	3	-7.2505
CHD1	8	0.30812	0.60848	0.999997	12078	3	-2.6251	0.030033	0.082046	0.907114	1854	2	-2.6251
RAB33A	10	0.010502	0.058184	0.766628	1426	5	-3.3935	0.030054	0.087355	0.91054	1855	4	-3.3935
TCEA1	8	0.098048	0.29696	0.981722	6229	5	-5.7205	0.030084	0.082157	0.907114	1856	2	-5.7205
GCK	8	0.029028	0.12168	0.874314	2831	5	-6.3707	0.030097	0.082175	0.907114	1857	1	-6.3707
HOMER3	10	0.11681	0.35521	0.990892	6977	3	-2.5685	0.030106	0.08747	0.91054	1858	4	-2.5685
DHCR24	9	0.035659	0.14565	0.888638	3260	5	-5.356	0.030151	0.086641	0.91054	1859	3	-5.356
WNK2	8	0.98248	0.9896	0.999997	20139	1	-3.3809	0.030203	0.082381	0.907114	1860	3	-3.3809
OLFML3	10	0.90924	0.97585	0.999997	19591	3	-4.8835	0.030208	0.087701	0.91054	1861	2	-4.8835
TBX18	9	0.38668	0.69503	0.999997	13625	4	0.65807	0.030219	0.086807	0.91054	1862	4	0.65807
G6PD	6	0.2407	0.48889	0.999997	10599	2	0.74517	0.030229	0.073701	0.898482	1863	3	0.74517
CLDND2	10	0.015812	0.079725	0.793634	1922	5	-5.5917	0.030261	0.087802	0.91054	1864	3	-5.5917
ZFYVE9	9	0.0050813	0.0289	0.683321	844	4	-1.0111	0.03031	0.087024	0.91054	1865	3	-1.0111
HOXD8	10	0.36378	0.69413	0.999997	13192	3	-5.2936	0.030314	0.087925	0.91054	1866	1	-5.2936
AC099552	10	0.32641	0.65388	0.999997	12436	4	-2.9811	0.030317	0.087934	0.91054	1867	3	-2.9811
RASGRF2	7	0.034436	0.12995	0.881529	3180	4	-6.0588	0.030326	0.076312	0.901106	1868	3	-6.0588
LRBA	9	0.72436	0.90958	0.999997	18030	4	-2.8476	0.030337	0.087091	0.91054	1869	2	-2.8476
MAGEB16	9	0.21541	0.50979	0.999997	9902	4	-5.368	0.030406	0.087255	0.91054	1870	4	-5.368
WDR13	7	0.17502	0.42104	0.999997	8809	4	-6.041	0.030411	0.076489	0.901106	1871	2	-6.041
PPM1G	9	0.89315	0.96847	0.999997	19466	2	-0.34139	0.030412	0.087267	0.91054	1872	3	-0.34139
P4HA3	10	0.68699	0.8993	0.999997	17648	4	-4.9089	0.030448	0.088236	0.91054	1873	3	-4.9089
GMPR2	9	0.13394	0.37659	0.999997	7544	3	-0.44619	0.030472	0.087432	0.91054	1874	3	-0.44619
BEX4	10	0.30342	0.62796	0.999997	11982	3	-5.2199	0.030474	0.088303	0.91054	1875	3	-5.2199
FIGN	9	0.6146	0.85292	0.999997	16893	4	-5.5128	0.030495	0.087486	0.91054	1876	2	-5.5128
CRYBA4	10	0.02253	0.10549	0.85025	2404	8	-6.5576	0.030499	0.088374	0.91054	1877	1	-6.5576
ME3	10	0.019061	0.092311	0.821396	2186	5	-3.5499	0.030516	0.088418	0.91054	1878	4	-3.5499
KLRC4	7	0.53019	0.78107	0.999997	15808	2	-3.6455	0.030525	0.076734	0.901106	1879	3	-3.6455
ZNF45	7	0.9929	0.99281	0.999997	20251	0	-5.368	0.030532	0.07675	0.901106	1880	2	-5.368
VPREB1	9	0.52064	0.80304	0.999997	15668	1	-2.5858	0.030564	0.087668	0.91054	1881	3	-2.5858
SLC17A6	9	0.18933	0.46949	0.999997	9177	4	-5.5884	0.030576	0.0877	0.91054	1882	2	-5.5884
FAT1	8	0.60689	0.84229	0.999997	16797	4	-5.1448	0.030591	0.083099	0.907114	1883	3	-5.1448
RBFOX1	9	0.29467	0.60716	0.999997	11808	4	-5.4175	0.030618	0.087806	0.91054	1884	4	-5.4175
VIMP	10	0.64672	0.8834	0.999997	17259	2	-5.8859	0.030632	0.088678	0.91054	1885	1	-5.8859
SIGMAR1	7	0.62932	0.83422	0.999997	17056	2	-5.2906	0.03065	0.076986	0.901106	1886	1	-5.2906
PKP2	9	0.16153	0.42428	0.999997	8417	3	-1.3372	0.030682	0.08797	0.91054	1887	4	-1.3372
SFT2D1	7	0.10812	0.30269	0.984201	6616	2	-0.38482	0.030699	0.077099	0.901106	1888	3	-0.38482
TAPBPL	9	0.061852	0.22153	0.95059	4668	5	-6.1279	0.030741	0.088116	0.91054	1889	2	-6.1279
COA3	6	0.17785	0.40342	0.999997	8895	2	-1.8897	0.030791	0.074897	0.898482	1890	3	-1.8897
TAOK1	10	0.28151	0.60239	0.999997	11538	4	-0.70263	0.030832	0.089153	0.913116	1891	3	-0.70263
RBFOX3	7	0.46699	0.73666	0.999997	14921	3	-5.4331	0.030835	0.077377	0.901106	1892	1	-5.4331
APIP	9	0.43169	0.7348	0.999997	14381	3	-5.0775	0.03084	0.088367	0.91054	1893	2	-5.0775
SLFNL1	8	0.53941	0.79709	0.999997	15929	3	-1.3223	0.03084	0.083586	0.907114	1894	1	-1.3223
GSTA5	8	0.0046224	0.026265	0.666354	791	5	-6.9376	0.03084	0.083586	0.907114	1895	1	-6.9376
STRC	7	0.50609	0.76833	0.999997	15488	3	-5.642	0.030844	0.07739	0.901106	1896	2	-5.642
C15ORF37	9	0.26478	0.57683	0.999997	11165	4	-5.7359	0.03086	0.088415	0.91054	1897	2	-5.7359
RECQL	8	0.0085017	0.043225	0.721289	1238	3	-2.0712	0.030927	0.083745	0.907114	1898	3	-2.0712
TARDBP	9	0.47342	0.77029	0.999997	15012	5	-5.5563	0.030949	0.088623	0.91054	1899	3	-5.5563
GOLGA8R	7	0.37219	0.65011	0.999997	13363	4	-5.4084	0.030952	0.077596	0.901106	1900	3	-5.4084
ERP44	8	0.82549	0.93948	0.999997	18928	3	-5.2019	0.030968	0.083828	0.907114	1901	1	-5.2019
HFE	6	0.84975	0.92617	0.999997	19131	1	-1.6263	0.030982	0.075323	0.899128	1902	3	-1.6263
LINC01098	7	0.093005	0.27349	0.966031	6031	3	-5.8721	0.030984	0.077667	0.901134	1903	1	-5.8721
PRRT4	8	0.32661	0.62991	0.999997	12446	5	-6.2057	0.031095	0.084081	0.908366	1904	1	-6.2057
TYRO3	9	0.043032	0.16812	0.909644	3693	6	-6.2585	0.031101	0.089008	0.912496	1905	1	-6.2585
SPTA1	10	0.2023	0.50306	0.999997	9564	5	-2.9807	0.031167	0.089921	0.915014	1906	4	-2.9807
UST	7	0.092849	0.27318	0.966031	6027	3	-6.2585	0.03117	0.078046	0.901256	1907	1	-6.2585
C8orf34	8	0.27992	0.57484	0.999997	11503	3	-5.0758	0.031176	0.084231	0.908712	1908	2	-5.0758
DEFB118	7	0.0062244	0.031901	0.702645	984	5	-6.796	0.031208	0.078114	0.901256	1909	2	-6.796
PPHLN1	9	0.21972	0.51617	0.999997	10027	2	-3.9934	0.031239	0.08935	0.913903	1910	3	-3.9934
ZNF439	9	0.6736	0.88367	0.999997	17525	4	-4.2214	0.031245	0.089365	0.913903	1911	3	-4.2214
NCAM2	10	0.27905	0.59952	0.999997	11480	3	-2.8215	0.031245	0.090104	0.915014	1912	4	-2.8215
SUCLA2	8	0.30354	0.60301	0.999997	11985	4	-3.3475	0.031275	0.084409	0.908712	1913	3	-3.3475
KIAA1644	9	0.1963	0.48039	0.999997	9387	5	-5.2487	0.031276	0.08944	0.914219	1914	3	-5.2487
GDPD2	10	0.051267	0.20282	0.937659	4141	3	-1.4637	0.031306	0.090236	0.915014	1915	3	-1.4637
COX7A2	6	0.74118	0.87624	0.999997	18230	2	-0.89206	0.031312	0.075989	0.901106	1916	2	-0.89206
LRRC38	10	0.099353	0.31805	0.984201	6279	4	-3.2012	0.031333	0.090291	0.915116	1917	4	-3.2012
EXOSC7	6	0.8589	0.93095	0.999997	19201	2	-5.7027	0.031375	0.076125	0.901106	1918	1	-5.7027
MSANTD2	9	0.31191	0.6243	0.999997	12149	3	-4.8965	0.031388	0.089733	0.915014	1919	2	-4.8965
SSR4	8	0.99085	0.99255	0.999997	20222	1	-2.8919	0.031392	0.084618	0.908712	1920	2	-2.8919
SLC38A4	8	0.66587	0.87318	0.999997	17440	3	-5.0558	0.031519	0.084866	0.908712	1921	2	-5.0558
BOLA1	8	0.98168	0.98938	0.999997	20133	1	-0.15921	0.031532	0.084885	0.908712	1922	3	-0.15921
AC006455	9	0.14342	0.39329	0.999997	7875	3	-0.1869	0.031556	0.09017	0.915014	1923	4	-0.1869
OR14A16	7	0.83847	0.93307	0.999997	19041	2	0.37657	0.03156	0.078835	0.90467	1924	3	0.37657
DENND2D	9	0.36236	0.67267	0.999997	13168	2	0.39533	0.031572	0.090214	0.915014	1925	4	0.39533
RAB11FIP1	10	0.045893	0.18572	0.92081	3868	6	-7.1456	0.031574	0.09085	0.915212	1926	2	-7.1456
GRIK4	9	0.93888	0.98054	0.999997	19807	2	-0.42953	0.031575	0.090223	0.915014	1927	3	-0.42953
DEFB119	8	0.27992	0.57484	0.999997	11504	5	-5.6094	0.0316	0.085015	0.908712	1928	3	-5.6094
FAM104A	10	0.78717	0.93931	0.999997	18627	3	-2.3294	0.031604	0.090917	0.915212	1929	4	-2.3294
E2F3	8	0.82825	0.94067	0.999997	18952	3	-0.0088691	0.031649	0.085106	0.908712	1930	3	-0.0088691
OR51D1	9	0.27685	0.58922	0.999997	11425	4	-5.0918	0.031674	0.090467	0.915212	1931	3	-5.0918
SLCO5A1	9	0.34251	0.65391	0.999997	12775	5	-6.0758	0.03169	0.090512	0.915212	1932	4	-6.0758
RLN2	9	0.38389	0.69251	0.999997	13567	4	-5.2516	0.03171	0.090549	0.915212	1933	4	-5.2516
DSG3	10	0.1146	0.35062	0.988347	6893	6	-5.8897	0.031743	0.091235	0.915212	1934	3	-5.8897
PRTFDC1	10	0.15005	0.42092	0.999997	8054	5	-5.0921	0.031752	0.09126	0.915212	1935	4	-5.0921
KRTAP10-7	10	0.77698	0.93531	0.999997	18557	4	-3.129	0.031786	0.091339	0.915212	1936	4	-3.129
C16orf62	9	0.58793	0.83896	0.999997	16555	1	-4.4876	0.03182	0.090824	0.915212	1937	4	-4.4876
SLC25A10	10	0.01296	0.068354	0.775265	1666	2	-0.90276	0.031842	0.09147	0.915252	1938	2	-0.90276
SGK494	3	0.11559	0.25005	0.961181	6928	1	1.6754	0.031844	0.058242	0.88632	1939	2	1.6754
DPP4	9	0.36611	0.67622	0.999997	13233	3	-4.7108	0.031872	0.090949	0.915212	1940	3	-4.7108
PHLPP1	7	0.40357	0.67959	0.999997	13916	3	-3.0597	0.031878	0.079478	0.907114	1941	3	-3.0597
SFTPB	8	0.044104	0.16697	0.909644	3750	5	-6.1923	0.031899	0.085566	0.908712	1942	3	-6.1923
TAF1D	9	0.23507	0.53865	0.999997	10457	5	-6.0588	0.031913	0.091054	0.915212	1943	2	-6.0588
RP11-295D22	6	0.17179	0.39484	0.999997	8735	3	-4.1174	0.031949	0.077367	0.901106	1944	2	-4.1174
TBX21	9	0.27374	0.58603	0.999997	11364	2	-4.6755	0.031971	0.091211	0.915212	1945	3	-4.6755
TXNDC12	9	0.28982	0.60237	0.999997	11701	4	-3.2684	0.031975	0.091225	0.915212	1946	4	-3.2684
STK24	9	0.46099	0.75996	0.999997	14833	3	-5.0611	0.032	0.09127	0.915212	1947	3	-5.0611
SUV420H1	8	0.96105	0.98451	0.999997	19973	2	-4.2221	0.032007	0.085784	0.908712	1948	2	-4.2221
NPB	8	0.030281	0.12608	0.881529	2901	6	-7.2693	0.032071	0.085894	0.908712	1949	2	-7.2693
ATP5B	9	0.0022967	0.014756	0.592792	494	4	-5.393	0.032103	0.091534	0.915252	1950	1	-5.393
ALKBH7	10	0.053094	0.20858	0.946106	4227	4	-3.1134	0.032139	0.092163	0.91742	1951	3	-3.1134
C2orf88	9	0.057481	0.20953	0.946106	4440	2	-0.73533	0.032205	0.091778	0.91627	1952	4	-0.73533
SND1	9	0.0087302	0.04639	0.72923	1262	5	-7.0203	0.032227	0.091836	0.91627	1953	2	-7.0203
TRIM40	9	0.88507	0.96553	0.999997	19407	2	0.47694	0.032265	0.091933	0.91627	1954	4	0.47694
AMY2A	6	0.40854	0.66451	0.999997	14003	2	-0.76268	0.032308	0.07814	0.901256	1955	3	-0.76268
VPS41	10	0.33947	0.6682	0.999997	12706	5	-2.598	0.03231	0.092586	0.917662	1956	4	-2.598
MDM2	8	0.059688	0.20682	0.943184	4559	3	-4.4007	0.032325	0.086395	0.91054	1957	2	-4.4007
RNF114	7	0.39876	0.67515	0.999997	13833	2	-1.5797	0.032339	0.080392	0.907114	1958	2	-1.5797
ZG16	10	0.13592	0.39351	0.999997	7605	6	-6.2635	0.032357	0.092704	0.917662	1959	2	-6.2635
ZNF248	10	0.60547	0.86337	0.999997	16780	5	-5.1462	0.032368	0.092735	0.917662	1960	3	-5.1462
TRAV23DV6	9	0.047872	0.18227	0.918658	3973	6	-6.1369	0.032368	0.092191	0.91742	1961	2	-6.1369
OR6V1	9	0.17066	0.43953	0.999997	8697	4	-4.8316	0.032389	0.092249	0.91742	1962	3	-4.8316
KIF1C	10	0.80588	0.94673	0.999997	18770	3	-2.8395	0.032397	0.092812	0.917662	1963	4	-2.8395
DNAH8	9	0.011925	0.060988	0.769447	1564	5	-6.2825	0.032399	0.092273	0.91742	1964	2	-6.2825
ELOF1	10	0.97864	0.99311	0.999997	20110	1	0.13405	0.032413	0.092846	0.917662	1965	3	0.13405
NSG1	8	0.14218	0.38861	0.999997	7822	5	-6.4924	0.032473	0.086677	0.91054	1966	1	-6.4924
RNF169	8	0.62255	0.85262	0.999997	16972	3	-5.5334	0.032473	0.086677	0.91054	1967	2	-5.5334
MYH7B	8	0.30161	0.60074	0.999997	11959	2	-3.0675	0.032485	0.086696	0.91054	1968	3	-3.0675
CST9L	9	0.23544	0.5392	0.999997	10470	4	-4.6863	0.032485	0.092478	0.917662	1969	3	-4.6863
FGF1	10	0.50007	0.79519	0.999997	15418	5	-5.6224	0.032487	0.093013	0.917662	1970	2	-5.6224
AFF1	10	0.077246	0.26832	0.964944	5387	4	0.59563	0.032495	0.093031	0.917662	1971	4	0.59563
EFCAB11	9	0.07684	0.26144	0.963894	5371	4	-5.4886	0.03251	0.092535	0.917662	1972	2	-5.4886
PIP5KL1	8	0.28468	0.58062	0.999997	11608	4	-5.789	0.032525	0.08675	0.91054	1973	2	-5.789
MCPH1	9	0.83386	0.94781	0.999997	19006	3	-1.034	0.03253	0.092577	0.917662	1974	3	-1.034
DPM3	10	0.42898	0.74562	0.999997	14349	4	-5.1542	0.032537	0.093128	0.917662	1975	3	-5.1542
NYAP1	9	0.80741	0.93933	0.999997	18783	2	-3.5955	0.032591	0.092735	0.917662	1976	2	-3.5955
SQSTM1	8	0.18574	0.45247	0.999997	9096	5	-5.5626	0.032622	0.086932	0.91054	1977	2	-5.5626
SLC7A6OS	9	0.62524	0.85854	0.999997	17010	3	-4.1621	0.032641	0.09285	0.917662	1978	2	-4.1621
LCE3C	9	0.69897	0.89666	0.999997	17780	2	-5.8721	0.032681	0.092941	0.917662	1979	4	-5.8721
LSM2	7	0.39178	0.66872	0.999997	13698	3	-4.788	0.032711	0.081108	0.907114	1980	3	-4.788
OR2Z1	10	0.08779	0.29232	0.977413	5854	5	-2.952	0.032719	0.093561	0.917662	1981	4	-2.952
AC011298	10	0.068635	0.24794	0.958575	4999	2	-0.78975	0.032741	0.093602	0.917662	1982	4	-0.78975
PRADC1	7	0.73451	0.89182	0.999997	18164	3	-5.2516	0.032767	0.081215	0.907114	1983	1	-5.2516
NANOS3	9	0.36631	0.67642	0.999997	13243	3	-1.7148	0.032805	0.093262	0.917662	1984	4	-1.7148
ZC3H18	10	0.50981	0.8018	0.999997	15533	4	-5.4894	0.032809	0.093748	0.918653	1985	4	-5.4894
KRT35	9	0.37366	0.68307	0.999997	13383	4	-2.4663	0.032818	0.09329	0.917662	1986	2	-2.4663
AGAP10	4	0.99069	0.99067	0.999997	20220	0	-1.3239	0.032821	0.064699	0.889914	1987	2	-1.3239
DFNA5	9	0.39039	0.69835	0.999997	13671	4	-4.3737	0.032862	0.093402	0.917662	1988	4	-4.3737
RGS19	9	0.12272	0.35637	0.990892	7199	5	-5.8651	0.032864	0.093408	0.917662	1989	2	-5.8651
LHX6	8	0.81271	0.93381	0.999997	18828	3	-5.3843	0.032893	0.087472	0.91054	1990	2	-5.3843
TRHDE	10	0.068907	0.2486	0.959152	5014	7	-6.8173	0.03291	0.093992	0.919269	1991	2	-6.8173
OR5B2	9	0.19765	0.48252	0.999997	9432	3	-4.9351	0.032937	0.093599	0.917662	1992	3	-4.9351
TLN2	9	0.91504	0.97567	0.999997	19637	1	-0.88022	0.032937	0.093599	0.917662	1993	3	-0.88022
OR51S1	10	0.39821	0.72335	0.999997	13814	5	-6.2559	0.032996	0.094214	0.919269	1994	3	-6.2559
PIGG	10	0.26143	0.57821	0.999997	11094	3	-3.068	0.033029	0.094304	0.919269	1995	4	-3.068
SUN3	8	0.065663	0.22176	0.95059	4851	4	-6.6024	0.033067	0.087771	0.91054	1996	3	-6.6024
PRM2	5	0.79522	0.89017	0.999997	18681	2	-6.1748	0.033084	0.076068	0.901106	1997	1	-6.1748
C8orf44-SGK3	10	0.027766	0.12445	0.879673	2741	8	-5.6526	0.033122	0.094519	0.919269	1998	1	-5.6526
SLC5A2	10	0.51542	0.80553	0.999997	15594	5	-3.2007	0.033122	0.094519	0.919269	1999	2	-3.2007
[truncated: 18,393 more rows]
