# Supplementary material for: A HIF independent oxygen-sensitive pathway for controlling cholesterol synthesis
Source: Nat Commun. 2023 Aug 9;14:4816. doi: 10.1038/s41467-023-40541-1 (PMC10412576; doi:10.1038/s41467-023-40541-1)
Supplement: Supplementary file 3 — Supplementary Data 2 [file 41467_2023_40541_MOESM3_ESM.xlsx]

## Sheet: Sheet1
Data S2: CRISPR/Cas9 mutagenesis screen in SREBP2-Clover cells
id	num	neg	score	neg	p-value	neg	fdr	neg	rank	neg	goodsgrna	neg	lfc
MARCHF6	4	1	1	0.999998	18050	0	8.5014	1.65e-06	4.66e-06	0.084158	1	4	8.5014
PSTPIP1	4	0.24562	0.44543	0.999238	7880	1	8.4077	2.2e-05	9.08e-05	0.379774	2	3	8.4077
HSD17B12	4	0.99998	0.99998	0.999998	18049	0	7.9246	2.49e-05	0.0001012	0.379774	3	4	7.9246
ZNF251	4	0.95236	0.95252	0.999998	17176	0	6.1483	2.85e-05	0.00011327	0.379774	5	4	6.1483
SLC48A1	4	0.99997	0.99997	0.999998	18048	0	7.2627	2.81e-05	0.00011327	0.379774	4	4	7.2627
CXorf27	4	0.99996	0.99996	0.999998	18047	0	7.5619	3.62e-05	0.00014015	0.379774	6	4	7.5619
MLST8	4	0.22769	0.42036	0.999238	7443	2	4.7278	3.84e-05	0.00014728	0.379774	7	2	4.7278
TNFRSF6B	4	0.99995	0.99995	0.999998	18046	0	7.2671	5.03e-05	0.0001972	0.444926	8	4	7.2671
COQ9	4	0.85617	0.86572	0.999238	15587	1	5.6918	8.56e-05	0.00032939	0.603465	9	3	5.6918
SSRP1	4	0.99991	0.99991	0.999998	18045	0	6.9899	8.8e-05	0.00033433	0.603465	10	4	6.9899
SORD	4	0.99002	0.99003	0.999998	17858	0	8.299	0.00013804	0.0005307	0.750518	11	4	8.299
TAB1	4	0.50412	0.65878	0.999238	11712	2	-0.071752	0.00014269	0.0005499	0.750518	12	2	-0.071752
EXOSC4	3	0.016328	0.042596	0.911792	986	2	-3.1715	0.00023544	0.00071117	0.750518	18	1	-3.1715
TAP1	4	0.9998	0.9998	0.999998	18044	0	7.6156	0.00019771	0.00072708	0.750518	13	4	7.6156
NCSTN	4	0.17937	0.35011	0.996369	6195	3	-1.8749	0.00019977	0.00073311	0.750518	14	1	-1.8749
LONP2	4	0.99978	0.99979	0.999998	18043	0	6.5481	0.0002152	0.00078961	0.750518	15	4	6.5481
SPIN4	3	0.99973	0.99971	0.999998	18041	0	7.7332	0.00027202	0.00081813	0.750518	20	3	7.7332
ADAMTS3	4	0.99977	0.99978	0.999998	18042	0	6.3523	0.00022689	0.00082856	0.750518	16	4	6.3523
YY1	4	0.23951	0.43696	0.999238	7729	1	8.5103	0.00023273	0.00084721	0.750518	17	3	8.5103
TRMT2A	4	0.078141	0.18829	0.995321	3355	2	2.8244	0.00025684	0.00093278	0.750518	19	2	2.8244
HIST1H2BO	2	0.29407	0.38055	0.996369	8580	1	5.0677	0.0004994	0.00098818	0.750518	43	1	5.0677
KDELR2	4	0.99971	0.99972	0.999998	18040	0	6.4713	0.00028707	0.0010318	0.750518	21	4	6.4713
C19orf73	4	0.98438	0.98446	0.999998	17750	0	8.569	0.00029884	0.0010776	0.750518	22	4	8.569
RBM25	4	0.6718	0.77373	0.999238	13786	1	3.4601	0.00031966	0.0011538	0.750518	23	2	3.4601
C12orf29	3	0.99961	0.9996	0.999998	18037	0	7.4043	0.00039083	0.0011686	0.750518	29	3	7.4043
FRMPD2	4	0.062659	0.16114	0.995321	2867	1	3.0986	0.00033785	0.0012147	0.750518	24	2	3.0986
P4HA3	4	0.99965	0.99965	0.999998	18039	0	7.5435	0.00034515	0.00124	0.750518	25	4	7.5435
CCDC68	4	0.25209	0.45124	0.999238	7985	2	-0.81152	0.00037097	0.001337	0.750518	26	1	-0.81152
ASCC2	4	0.99962	0.99963	0.999998	18038	0	6.057	0.00037513	0.0013497	0.750518	27	4	6.057
SNX17	4	0.80164	0.83216	0.999238	14934	1	7.4982	0.00037764	0.0013595	0.750518	28	3	7.4982
RNF44	4	0.99959	0.99959	0.999998	18036	0	7.0308	0.00040703	0.0014649	0.750518	30	4	7.0308
GSPT1	4	0.48549	0.643	0.999238	11397	2	-1.0935	0.00042804	0.0015416	0.750518	31	1	-1.0935
UBE3C	4	0.99957	0.99957	0.999998	18035	0	7.4942	0.00043213	0.0015521	0.750518	32	4	7.4942
NDUFB9	4	0.82053	0.84286	0.999238	15136	1	6.0482	0.0004327	0.0015532	0.750518	33	3	6.0482
GRHPR	4	0.20872	0.39332	0.996369	6988	1	8.2264	0.00044467	0.0016047	0.750518	34	3	8.2264
SCN10A	4	0.66484	0.7711	0.999238	13736	1	7.8383	0.00045305	0.0016437	0.750518	35	3	7.8383
CEP68	4	0.96686	0.96699	0.999998	17437	0	8.1539	0.0004649	0.0016908	0.750518	36	4	8.1539
KCTD3	4	0.83604	0.8524	0.999238	15326	1	7.3752	0.00046713	0.0017018	0.750518	37	3	7.3752
OR52N1	4	0.83093	0.84925	0.999238	15265	1	4.7484	0.00046938	0.0017089	0.750518	38	2	4.7484
LIAS	4	0.99953	0.99953	0.999998	18034	0	6.7986	0.00047174	0.0017172	0.750518	39	4	6.7986
CCDC153	4	0.22275	0.41343	0.998966	7344	1	6.013	0.0004851	0.0017622	0.750518	40	3	6.013
C17orf59	4	0.88913	0.89102	0.999238	16056	1	7.7153	0.00048807	0.0017687	0.750518	41	3	7.7153
MPG	4	0.99951	0.99951	0.999998	18033	0	7.5011	0.00049292	0.0017879	0.750518	42	4	7.5011
GNB2	4	0.99949	0.99949	0.999998	18032	0	6.3537	0.00051207	0.0018532	0.751738	44	4	6.3537
CAPNS1	4	0.19571	0.3742	0.996369	6654	1	9.1924	0.00052478	0.0019009	0.751738	45	3	9.1924
CBY1	4	0.99947	0.99948	0.999998	18031	0	6.6281	0.00053398	0.0019295	0.751738	46	4	6.6281
ZNF768	4	0.13675	0.28451	0.996369	5016	2	1.6385	0.00054216	0.0019574	0.751738	47	2	1.6385
EGFR	4	0.40215	0.57365	0.999238	10171	1	7.4705	0.00055625	0.0020106	0.75298	48	3	7.4705
OCSTAMP	4	0.28311	0.47647	0.999238	8441	2	3.4557	0.00056341	0.0020441	0.75298	49	2	3.4557
LDLRAD1	3	0.99927	0.99927	0.999998	18029	0	6.623	0.00073497	0.0021489	0.764375	56	3	6.623
PCED1B	4	0.966	0.96613	0.999998	17425	0	3.6919	0.00059921	0.0021719	0.764375	50	4	3.6919
PTMS	4	0.99939	0.99941	0.999998	18030	0	6.8356	0.00060682	0.0022021	0.764375	51	4	6.8356
RTN4R	4	0.53755	0.68709	0.999238	12222	2	4.7501	0.0006196	0.0022493	0.766019	52	2	4.7501
GFAP	4	0.48664	0.64397	0.999238	11415	2	-0.37817	0.00065627	0.0023694	0.76635	53	1	-0.37817
TMED1	3	0.052895	0.12624	0.96972	2578	2	-1.9132	0.00087736	0.0025422	0.76635	71	1	-1.9132
LDLRAD2	4	0.99066	0.99068	0.999998	17864	0	7.4568	0.00072133	0.0026009	0.76635	54	4	7.4568
ALG5	4	0.94371	0.94391	0.999998	17029	0	7.4761	0.00073253	0.0026387	0.76635	55	3	7.4761
MYH8	3	0.88507	0.88506	0.999238	15988	0	9.2846	0.00093796	0.0027199	0.76635	78	2	9.2846
MAPK15	4	0.8055	0.83427	0.999238	14979	1	6.3681	0.0007644	0.0027451	0.76635	57	3	6.3681
NAPG	4	0.99923	0.99923	0.999998	18028	0	7.2858	0.00076796	0.0027577	0.76635	58	4	7.2858
CDC45	4	0.1664	0.3306	0.996369	5854	1	4.6289	0.00077037	0.002766	0.76635	59	3	4.6289
ENTPD6	4	0.48784	0.64496	0.999238	11430	2	3.9416	0.00077682	0.0027857	0.76635	60	2	3.9416
WWP1	4	0.99921	0.99922	0.999998	18027	0	6.7858	0.00078602	0.0028164	0.76635	61	4	6.7858
POLR2E	4	0.99918	0.99919	0.999998	18026	0	5.911	0.00081509	0.0029141	0.76635	62	4	5.911
MYRF	4	0.99918	0.99918	0.999998	18025	0	7.0778	0.00082005	0.0029327	0.76635	63	4	7.0778
EPGN	4	0.98187	0.98199	0.999998	17698	0	6.8036	0.00082157	0.0029382	0.76635	64	4	6.8036
TRIM58	4	0.52829	0.67933	0.999238	12079	1	4.2456	0.00082742	0.0029596	0.76635	65	3	4.2456
PVRL3	4	0.84574	0.85858	0.999238	15450	1	7.3649	0.00083089	0.0029722	0.76635	66	3	7.3649
GNAL	4	0.99772	0.99774	0.999998	17994	0	7.4449	0.00084494	0.0030249	0.76635	67	4	7.4449
ZNF329	4	0.99915	0.99915	0.999998	18024	0	6.6655	0.00085062	0.0030485	0.76635	68	4	6.6655
ARSD	4	0.99914	0.99913	0.999998	18023	0	5.9762	0.00086493	0.0031028	0.76635	69	4	5.9762
PHF23	4	0.99913	0.99913	0.999998	18022	0	6.9943	0.00086521	0.0031033	0.76635	70	4	6.9943
GNL2	4	0.99861	0.99858	0.999998	18014	0	8.352	0.00087771	0.003156	0.76635	72	4	8.352
C7orf49	4	0.049887	0.13841	0.980699	2482	3	-4.0012	0.00088446	0.0031829	0.76635	73	1	-4.0012
KANK2	4	0.99911	0.99911	0.999998	18021	0	6.7951	0.00088966	0.0031993	0.76635	74	4	6.7951
RMDN3	4	0.86664	0.87327	0.999238	15718	1	7.0543	0.00090026	0.0032267	0.76635	75	3	7.0543
OR5C1	4	0.46879	0.62893	0.999238	11164	1	7.4925	0.0009231	0.0033101	0.769959	76	3	7.4925
NPFFR2	4	0.99906	0.99906	0.999998	18020	0	5.7959	0.00093765	0.0033617	0.769959	77	4	5.7959
GFOD2	4	0.24324	0.44214	0.999238	7824	2	0.90463	0.0009415	0.0033699	0.769959	79	2	0.90463
MAP2K3	4	0.99808	0.99809	0.999998	17999	0	7.8734	0.00098034	0.003507	0.782681	80	4	7.8734
RXFP1	4	0.055565	0.1487	0.986723	2659	2	3.3525	0.0010041	0.0035948	0.782681	81	2	3.3525
ATAD2B	4	0.99637	0.99641	0.999998	17959	0	7.7555	0.0010282	0.0036793	0.782681	82	4	7.7555
SCGB1D2	4	0.99895	0.99895	0.999998	18019	0	6.8257	0.0010525	0.003778	0.782681	83	4	6.8257
GCN1L1	4	0.60382	0.74386	0.999238	13242	2	3.9845	0.0010556	0.0037901	0.782681	84	2	3.9845
SENP8	3	0.97978	0.97991	0.999998	17659	0	7.0135	0.0013265	0.0037967	0.782681	99	3	7.0135
UBE2G2	3	0.99846	0.99849	0.999998	18008	0	9.1443	0.0013829	0.0039365	0.782681	106	3	9.1443
MAP1S	4	0.079858	0.19133	0.995321	3412	1	0.59632	0.0011126	0.0039952	0.782681	85	2	0.59632
FAM133A	4	0.99888	0.99887	0.999998	18018	0	5.842	0.0011207	0.0040194	0.782681	86	4	5.842
E2F3	4	0.93118	0.93145	0.999238	16810	0	7.2067	0.0011229	0.0040259	0.782681	87	3	7.2067
IGFL4	4	0.45724	0.61925	0.999238	10995	1	4.9285	0.0011251	0.0040309	0.782681	88	2	4.9285
ZNF487	1	0.9959	0.99597	0.999998	17953	0	11.223	0.0041027	0.0040369	0.782681	290	1	11.223
SPC24	3	0.99393	0.99404	0.999998	17917	0	8.5556	0.0014285	0.0040523	0.782681	108	3	8.5556
OR5D16	4	0.99404	0.99411	0.999998	17919	0	7.8448	0.0011435	0.0040967	0.782681	89	4	7.8448
LTBR	4	0.60056	0.74106	0.999238	13193	2	4.4055	0.0011928	0.0042684	0.782681	90	2	4.4055
SMYD1	4	0.97796	0.97823	0.999998	17632	0	7.8472	0.0011938	0.0042706	0.782681	91	4	7.8472
MED26	4	0.33527	0.51879	0.999238	9180	2	3.4798	0.0012262	0.004383	0.782681	92	2	3.4798
HDHD1	4	0.96945	0.96958	0.999998	17472	0	4.6577	0.0012267	0.0043847	0.782681	93	4	4.6577
GPR75	4	0.34643	0.52791	0.999238	9349	1	7.3399	0.0012281	0.0043913	0.782681	94	3	7.3399
AKR1C3	4	0.90864	0.90883	0.999238	16387	1	5.4786	0.0012527	0.0044675	0.782681	95	3	5.4786
KIAA1239	3	0.31364	0.45824	0.999238	8848	1	8.9681	0.001568	0.0044686	0.782681	123	2	8.9681
CELA1	4	0.8846	0.88723	0.999238	15982	1	7.1271	0.001273	0.0045394	0.782681	96	3	7.1271
DYNLT3	4	0.5609	0.70711	0.999238	12556	1	4.8555	0.0012837	0.0045723	0.782681	97	3	4.8555
LCE4A	3	0.99838	0.99842	0.999998	18003	0	6.6652	0.0016173	0.0046134	0.782681	126	3	6.6652
SLC25A19	3	0.99837	0.99841	0.999998	18002	0	7.7148	0.0016255	0.0046469	0.782681	127	3	7.7148
CDK19	4	0.87268	0.87781	0.999238	15809	1	7.3196	0.001326	0.004716	0.782681	98	3	7.3196
FBXW10	4	0.8244	0.8452	0.999238	15189	1	0.96511	0.0013407	0.0047626	0.782681	100	2	0.96511
C16orf96	4	0.99866	0.99863	0.999998	18017	0	7.3636	0.0013448	0.0047769	0.782681	101	4	7.3636
ISG15	4	0.88638	0.88873	0.999238	16015	1	7.106	0.0013516	0.0047994	0.782681	102	3	7.106
IRAK1	4	0.99865	0.99862	0.999998	18016	0	6.7744	0.0013517	0.0047994	0.782681	103	4	6.7744
CCR1	4	0.99865	0.99862	0.999998	18015	0	5.8788	0.0013545	0.0048131	0.782681	104	4	5.8788
CD1E	4	0.94336	0.94357	0.999998	17022	0	7.112	0.0013555	0.0048164	0.782681	105	3	7.112
TM2D1	4	0.94666	0.94683	0.999998	17081	0	5.0281	0.0013977	0.0049672	0.782681	107	3	5.0281
LINC00632	4	0.99857	0.99854	0.999998	18013	0	6.195	0.001431	0.0050824	0.782681	109	4	6.195
FBXO15	4	0.69288	0.78185	0.999238	13963	1	4.2291	0.0014548	0.005162	0.782681	110	3	4.2291
IREB2	4	0.99854	0.99852	0.999998	18012	0	5.8952	0.001457	0.0051707	0.782681	111	4	5.8952
KRT73	4	0.99851	0.99849	0.999998	18011	0	6.7126	0.0014916	0.0052947	0.782681	112	4	6.7126
CPN1	4	0.4967	0.65252	0.999238	11588	1	7.5031	0.0014964	0.0053068	0.782681	113	3	7.5031
HIGD2B	3	0.97779	0.97795	0.999998	17629	0	8.6234	0.0018743	0.0053358	0.782681	143	3	8.6234
ACAA2	4	0.99849	0.99847	0.999998	18010	0	6.2392	0.0015064	0.0053424	0.782681	114	4	6.2392
MYLK3	4	0.09736	0.22086	0.996369	3923	3	-1.6826	0.0015118	0.0053709	0.782681	115	1	-1.6826
SDR9C7	3	0.92028	0.92033	0.999238	16596	0	8.6852	0.0018933	0.0053847	0.782681	145	3	8.6852
MASP2	4	0.99847	0.99846	0.999998	18009	0	7.0935	0.0015252	0.0054274	0.782681	116	4	7.0935
ZNF232	4	0.97003	0.97018	0.999998	17490	0	5.9047	0.0015416	0.0054768	0.782681	117	4	5.9047
RAD54L2	4	0.99846	0.99844	0.999998	18007	0	5.8364	0.0015438	0.0054845	0.782681	118	4	5.8364
RNF114	4	0.99844	0.99843	0.999998	18006	0	6.3137	0.0015572	0.0055284	0.782681	119	4	6.3137
CITED2	4	0.96845	0.96861	0.999998	17456	0	7.0592	0.0015579	0.00553	0.782681	120	4	7.0592
SEC11A	4	0.6357	0.76067	0.999238	13540	1	7.6298	0.0015604	0.0055388	0.782681	121	3	7.6298
IFT122	4	0.95467	0.9548	0.999998	17212	0	5.6585	0.0015631	0.0055503	0.782681	122	4	5.6585
ULK1	4	0.9984	0.99839	0.999998	18005	0	6.5762	0.0016038	0.0057001	0.78736	124	4	6.5762
SLC2A5	4	0.99839	0.99839	0.999998	18004	0	5.7838	0.0016075	0.0057138	0.78736	125	4	5.7838
MPC2	4	0.72362	0.79448	0.999238	14215	1	5.5166	0.0016258	0.005778	0.78736	128	3	5.5166
NT5C3A	4	0.92728	0.92758	0.999238	16729	0	6.9659	0.0016283	0.0057873	0.78736	129	3	6.9659
FGF13	4	0.92539	0.92569	0.999238	16703	0	7.1803	0.0016328	0.0058065	0.78736	130	3	7.1803
PDE1C	4	0.58268	0.7257	0.999238	12903	1	4.3105	0.0016828	0.0059721	0.78736	131	3	4.3105
KRT9	4	0.2864	0.47911	0.999238	8483	1	7.252	0.0017222	0.006112	0.78736	132	3	7.252
GRIK3	4	0.92674	0.92705	0.999238	16717	0	6.2768	0.0017255	0.0061279	0.78736	133	3	6.2768
SPICE1	4	0.99826	0.99826	0.999998	18001	0	5.6382	0.0017421	0.0061817	0.78736	134	4	5.6382
SPATA21	4	0.99825	0.99826	0.999998	18000	0	5.8026	0.0017455	0.0061926	0.78736	135	4	5.8026
PCDHGB3	4	0.93732	0.93751	0.999238	16909	0	7.807	0.0017551	0.0062294	0.78736	136	3	7.807
CAMLG	4	0.34956	0.53049	0.999238	9395	2	1.0301	0.0017683	0.006281	0.78736	137	2	1.0301
TMEM44	4	0.86062	0.86887	0.999238	15647	1	6.8877	0.0018167	0.0064263	0.78736	138	3	6.8877
COL15A1	4	0.31393	0.50158	0.999238	8850	1	8.0478	0.0018391	0.0065212	0.78736	139	3	8.0478
OR52B6	4	0.99641	0.99645	0.999998	17962	0	7.2177	0.0018509	0.00657	0.78736	140	4	7.2177
TIMM8B	4	0.098387	0.22251	0.996369	3956	3	-1.8408	0.0018538	0.0065805	0.78736	141	1	-1.8408
KMT2E	4	0.25216	0.4513	0.999238	7986	1	7.1556	0.0018743	0.0066534	0.78736	142	3	7.1556
OR1J1	4	0.94798	0.94816	0.999998	17100	0	7.2749	0.0018756	0.0066556	0.78736	144	3	7.2749
IFNA7	2	0.99659	0.99658	0.999998	17969	0	7.7034	0.003409	0.0066605	0.78736	243	2	7.7034
DCTN4	4	0.84287	0.8567	0.999238	15404	1	6.6833	0.0019108	0.0067894	0.78736	146	3	6.6833
TXNL1	3	0.92179	0.92186	0.999238	16630	0	8.4087	0.0024246	0.0068218	0.78736	180	3	8.4087
PRKX	4	0.84491	0.85804	0.999238	15436	1	4.7563	0.0019249	0.0068394	0.78736	147	2	4.7563
GNB4	4	0.1591	0.31945	0.996369	5654	2	4.0397	0.0019279	0.0068492	0.78736	148	2	4.0397
ATP2B4	4	0.59782	0.73862	0.999238	13140	1	6.9805	0.0019346	0.0068701	0.78736	149	3	6.9805
G0S2	3	0.91864	0.91871	0.999238	16573	0	4.7158	0.0024596	0.0069057	0.78736	183	3	4.7158
ANKH	4	0.99579	0.99581	0.999998	17952	0	7.0763	0.0019549	0.0069419	0.78736	150	4	7.0763
C11orf52	4	0.66816	0.77234	0.999238	13760	1	6.8537	0.00196	0.0069562	0.78736	151	3	6.8537
NBPF6	1	0.99297	0.99299	0.999998	17901	0	11.122	0.0070281	0.0069666	0.78736	452	1	11.122
PLD6	4	0.33373	0.5175	0.999238	9161	1	4.9002	0.0019678	0.0069853	0.78736	152	3	4.9002
FAM71F1	4	0.52804	0.67912	0.999238	12076	1	5.6292	0.0019731	0.0070023	0.78736	153	3	5.6292
MSTN	3	0.99751	0.99753	0.999998	17991	0	6.4841	0.0024919	0.0070034	0.78736	188	3	6.4841
PIN4	4	0.99801	0.99802	0.999998	17998	0	5.5019	0.0019888	0.0070593	0.78736	154	4	5.5019
HIST1H2BE	1	0.99279	0.9928	0.999998	17896	0	10.282	0.0072136	0.007146	0.78736	471	1	10.282
ADCK4	4	0.19457	0.37254	0.996369	6625	1	4.4961	0.0020248	0.0071888	0.78736	155	3	4.4961
NPY1R	4	0.76108	0.81137	0.999238	14529	1	7.4297	0.0020249	0.0071888	0.78736	156	3	7.4297
LEF1	4	0.99098	0.99101	0.999998	17871	0	7.9477	0.0020341	0.0072255	0.78736	157	4	7.9477
PLCB3	4	0.97734	0.97763	0.999998	17620	0	6.7423	0.0020407	0.0072541	0.78736	158	4	6.7423
OSCAR	4	0.79742	0.82988	0.999238	14893	1	7.0598	0.0020603	0.0073171	0.78736	159	3	7.0598
CKMT2	4	0.94313	0.94333	0.999998	17019	0	5.0559	0.0020681	0.0073479	0.78736	160	3	5.0559
C2CD4D	3	0.15702	0.28234	0.996369	5591	1	8.516	0.0026267	0.0073725	0.78736	197	2	8.516
NOXA1	4	0.29971	0.48996	0.999238	8659	2	0.73051	0.0020818	0.0073934	0.78736	161	2	0.73051
MKL1	4	0.99791	0.99792	0.999998	17997	0	6.4755	0.0020918	0.0074367	0.78736	162	4	6.4755
SIN3A	4	0.97662	0.9769	0.999998	17602	0	7.0956	0.0020977	0.0074592	0.78736	163	4	7.0956
TDO2	4	0.57606	0.71994	0.999238	12807	1	2.924	0.0021211	0.0075426	0.791532	164	2	2.924
DEPTOR	4	0.70176	0.78535	0.999238	14038	1	6.3541	0.0021388	0.0076018	0.793138	165	3	6.3541
TMPRSS12	4	0.81278	0.83838	0.999238	15055	1	7.1576	0.0021716	0.0077258	0.797508	166	3	7.1576
CFP	4	0.99782	0.99784	0.999998	17996	0	5.513	0.0021757	0.0077357	0.797508	167	4	5.513
GPR158	4	0.99781	0.99784	0.999998	17995	0	5.8528	0.002186	0.0077763	0.797508	168	4	5.8528
CTPS1	4	0.98494	0.985	0.999998	17760	0	7.0851	0.0022238	0.0079145	0.807099	169	4	7.0851
PPP1R15A	4	0.069113	0.17258	0.995321	3054	3	-1.9486	0.0022528	0.0080225	0.812683	170	1	-1.9486
MBD2	4	0.55051	0.69819	0.999238	12420	2	4.1276	0.0022646	0.0080593	0.812683	171	2	4.1276
RASL11B	4	0.64397	0.76357	0.999238	13582	1	6.1463	0.0023098	0.0082167	0.815587	172	3	6.1463
PLEKHB1	4	0.59341	0.73484	0.999238	13065	1	7.221	0.0023124	0.008226	0.815587	173	3	7.221
MORC1	4	0.98911	0.98916	0.999998	17837	0	7.8504	0.0023181	0.0082458	0.815587	174	4	7.8504
CD101	4	0.60057	0.74106	0.999238	13194	1	6.8872	0.0023238	0.0082688	0.815587	175	3	6.8872
PRKACA	4	0.70563	0.78689	0.999238	14066	1	0.30826	0.0023668	0.0084049	0.821015	176	2	0.30826
PTK6	4	0.36808	0.54554	0.999238	9677	1	7.2602	0.002376	0.0084317	0.821015	177	3	7.2602
MINA	4	0.99348	0.99353	0.999998	17909	0	7.0252	0.0023998	0.0085129	0.821015	178	4	7.0252
NDFIP2	4	0.42859	0.59551	0.999238	10548	1	6.1125	0.0024237	0.0085941	0.821015	179	3	6.1125
MAGEF1	4	0.99755	0.99755	0.999998	17993	0	6.0602	0.0024544	0.0087033	0.821015	181	4	6.0602
RND1	4	0.36097	0.53974	0.999238	9582	1	4.9542	0.0024563	0.0087148	0.821015	182	3	4.9542
C21orf90	4	0.99752	0.99753	0.999998	17992	0	6.1232	0.0024765	0.0087691	0.821015	184	4	6.1232
FAM150B	4	0.98272	0.98283	0.999998	17716	0	5.9137	0.0024807	0.0087856	0.821015	185	4	5.9137
CIAO1	4	0.84783	0.85999	0.999238	15474	1	6.9819	0.0024893	0.0088256	0.821015	186	3	6.9819
FAM47E	4	0.99523	0.99526	0.999998	17941	0	7.4304	0.0024917	0.0088311	0.821015	187	4	7.4304
TRAF5	4	0.99751	0.99751	0.999998	17990	0	6.9616	0.0024927	0.0088355	0.821015	189	4	6.9616
ZNF823	4	0.37838	0.55391	0.999238	9832	2	3.5498	0.0025207	0.0089161	0.821015	190	2	3.5498
AUP1	4	0.71899	0.79249	0.999238	14174	1	7.3702	0.0025377	0.0089775	0.821015	191	3	7.3702
OR51F2	4	0.97299	0.97323	0.999998	17541	0	6.5894	0.002555	0.0090291	0.821015	192	4	6.5894
FAM222A	4	0.74439	0.80357	0.999238	14389	1	7.0509	0.0025597	0.0090477	0.821015	193	3	7.0509
TCEANC	4	0.99742	0.99743	0.999998	17989	0	5.6795	0.0025762	0.0090925	0.821015	194	4	5.6795
MMP23B	4	0.9965	0.99655	0.999998	17966	0	6.889	0.0025773	0.0090971	0.821015	195	4	6.889
SULT2B1	4	0.50476	0.65932	0.999238	11724	1	4.849	0.0025947	0.0091618	0.822743	196	3	4.849
NKAIN4	4	0.72315	0.79427	0.999238	14207	1	5.8837	0.0026516	0.0093549	0.825664	198	3	5.8837
FKBP14	4	0.99734	0.99735	0.999998	17988	0	5.8161	0.0026607	0.0093829	0.825664	199	4	5.8161
INSR	4	0.78197	0.8217	0.999238	14726	1	6.7416	0.0027036	0.0095173	0.825664	200	3	6.7416
GNL1	4	0.99441	0.99446	0.999998	17924	0	5.3513	0.0027086	0.0095398	0.825664	201	4	5.3513
PKN3	3	0.99655	0.9966	0.999998	17968	0	7.6148	0.0034498	0.0095963	0.825664	245	3	7.6148
RAI14	4	0.99504	0.99508	0.999998	17937	0	6.6515	0.0027276	0.0096029	0.825664	202	4	6.6515
WDR83OS	4	0.69737	0.7836	0.999238	14002	1	7.0561	0.0027288	0.00961	0.825664	203	3	7.0561
COL10A1	4	0.99726	0.99727	0.999998	17987	0	5.9084	0.0027399	0.0096462	0.825664	204	4	5.9084
UBE4B	4	0.99725	0.99726	0.999998	17986	0	5.7984	0.002746	0.0096731	0.825664	205	4	5.7984
ZNF701	2	0.99501	0.99497	0.999998	17936	0	7.3911	0.0049927	0.0097	0.825664	339	2	7.3911
RHOXF1	4	0.89799	0.89877	0.999238	16204	1	6.3358	0.0027615	0.0097274	0.825664	206	3	6.3358
OR5AK2	4	0.61001	0.7492	0.999238	13329	1	3.9197	0.0027656	0.0097433	0.825664	207	3	3.9197
TPD52L1	4	0.66571	0.77144	0.999238	13743	1	7.2126	0.0028067	0.0098919	0.834343	208	3	7.2126
FAM212B	4	0.91875	0.91894	0.999238	16575	0	7.3065	0.0028406	0.010008	0.837711	209	3	7.3065
FBXO22	4	0.57279	0.71709	0.999238	12751	2	4.1453	0.0028442	0.010025	0.837711	210	2	4.1453
LRRC19	1	0.98979	0.9898	0.999998	17854	0	9.4869	0.01021	0.010115	0.840335	646	1	9.4869
INSIG1	4	0.96318	0.9633	0.999998	17366	0	3.6967	0.0028795	0.010149	0.840335	211	4	3.6967
CDK18	4	0.9971	0.99713	0.999998	17985	0	6.3908	0.0028998	0.010207	0.841205	212	4	6.3908
CLEC2A	4	0.99709	0.99711	0.999998	17984	0	5.7227	0.0029134	0.010259	0.841205	213	4	5.7227
CPSF7	4	0.99707	0.9971	0.999998	17983	0	5.5609	0.002927	0.010304	0.841205	214	4	5.5609
CORO1A	4	0.086468	0.20266	0.995964	3628	3	-1.7708	0.0029364	0.010346	0.841205	215	1	-1.7708
SLC6A17	4	0.99702	0.99705	0.999998	17982	0	6.6251	0.0029827	0.010496	0.845183	216	4	6.6251
PTGIS	4	0.99701	0.99705	0.999998	17981	0	5.5601	0.0029914	0.01053	0.845183	217	4	5.5601
TEX13B	4	0.96089	0.96101	0.999998	17320	0	5.2526	0.0029934	0.010538	0.845183	218	4	5.2526
SH3GLB1	4	0.99699	0.99703	0.999998	17980	0	5.687	0.0030112	0.010599	0.845183	219	4	5.687
RBM7	4	0.25902	0.45699	0.999238	8095	2	1.0043	0.0030503	0.010725	0.845183	220	2	1.0043
CHD7	4	0.88913	0.89102	0.999238	16057	1	6.8046	0.0030845	0.010841	0.845183	221	3	6.8046
EPN2	4	0.98112	0.98125	0.999998	17687	0	6.9477	0.0030941	0.010874	0.845183	222	4	6.9477
GALNT6	4	0.094703	0.2165	0.996369	3851	1	5.5363	0.0031073	0.010925	0.845183	223	3	5.5363
SGPP1	4	0.99689	0.99692	0.999998	17979	0	5.7323	0.0031137	0.010945	0.845183	224	4	5.7323
MPEG1	4	0.9811	0.98122	0.999998	17685	0	7.5077	0.0031147	0.010948	0.845183	225	4	7.5077
CHFR	4	0.99687	0.99691	0.999998	17978	0	5.9428	0.0031258	0.010992	0.845183	226	4	5.9428
SYT8	4	0.99488	0.99493	0.999998	17932	0	6.8971	0.0031327	0.011018	0.845183	227	4	6.8971
ZNF425	4	0.99687	0.99691	0.999998	17977	0	6.1398	0.0031333	0.011022	0.845183	228	4	6.1398
ERCC3	4	0.5514	0.69894	0.999238	12430	1	7.2303	0.0031465	0.01107	0.845183	229	3	7.2303
API5	4	0.99685	0.99689	0.999998	17976	0	5.4541	0.0031538	0.011103	0.845183	230	4	5.4541
NME3	4	0.65615	0.76794	0.999238	13667	1	1.5351	0.0031642	0.011144	0.845183	231	3	1.5351
FKBP5	4	0.65766	0.76847	0.999238	13679	1	2.7976	0.0032018	0.011267	0.850926	232	3	2.7976
PHLDB2	4	0.8219	0.8437	0.999238	15152	1	2.5903	0.0032212	0.011332	0.851506	233	3	2.5903
GJE1	4	0.99677	0.99681	0.999998	17975	0	5.2932	0.0032336	0.011369	0.851506	234	4	5.2932
PRODH2	4	0.82719	0.84688	0.999238	15218	1	4.2116	0.0033351	0.011721	0.854161	235	2	4.2116
FLII	4	0.99666	0.99671	0.999998	17974	0	6.7121	0.0033449	0.011752	0.854161	236	4	6.7121
SSTR4	4	0.99665	0.9967	0.999998	17973	0	5.3191	0.0033473	0.011758	0.854161	237	4	5.3191
CER1	4	0.69079	0.78104	0.999238	13943	1	6.7153	0.0033563	0.011792	0.854161	238	3	6.7153
BCL2L13	4	0.99664	0.99669	0.999998	17972	0	5.8753	0.0033632	0.011817	0.854161	239	4	5.8753
PIGC	4	0.99663	0.99668	0.999998	17971	0	6.3498	0.0033664	0.011826	0.854161	240	4	6.3498
MAML1	4	0.99663	0.99668	0.999998	17970	0	6.3112	0.0033696	0.011833	0.854161	241	4	6.3112
ZNF681	3	0.99572	0.9958	0.999998	17949	0	6.703	0.0042765	0.01184	0.854161	298	3	6.703
DYSF	4	0.069312	0.17292	0.995321	3062	3	-1.911	0.003392	0.011907	0.854161	242	1	-1.911
DONSON	4	0.23492	0.4306	0.999238	7617	2	-3.0177	0.0034489	0.012094	0.854161	244	1	-3.0177
SLC36A4	4	0.99653	0.99658	0.999998	17967	0	6.0443	0.0034688	0.012163	0.854161	246	4	6.0443
VCAN	4	0.56994	0.71473	0.999238	12712	1	5.8423	0.0034835	0.012218	0.854161	247	3	5.8423
BLVRB	4	0.76774	0.81457	0.999238	14586	1	6.9253	0.0034911	0.012246	0.854161	248	3	6.9253
MFSD4	4	0.9965	0.99655	0.999998	17965	0	5.7056	0.0035016	0.01228	0.854161	249	4	5.7056
RGS7	4	0.17574	0.34465	0.996369	6107	2	1.4804	0.0035059	0.012295	0.854161	250	2	1.4804
LPAR1	4	0.99644	0.99648	0.999998	17964	0	5.9105	0.0035586	0.012466	0.854161	251	4	5.9105
TTPA	4	0.75243	0.80734	0.999238	14456	1	6.6429	0.0035613	0.012474	0.854161	252	3	6.6429
ZNF703	4	0.87919	0.88289	0.999238	15907	1	2.5613	0.0035628	0.012476	0.854161	253	3	2.5613
ZNF480	4	0.99643	0.99648	0.999998	17963	0	5.9658	0.0035653	0.012483	0.854161	254	4	5.9658
AKR1C4	2	0.41401	0.46195	0.999238	10337	1	4.4775	0.0065109	0.012502	0.854161	421	1	4.4775
VPS29	4	0.99305	0.99309	0.999998	17902	0	6.6452	0.0035799	0.012531	0.854161	255	4	6.6452
DRD2	4	0.97236	0.9726	0.999998	17531	0	6.6195	0.0035854	0.012555	0.854161	256	4	6.6195
AIF1	4	0.9964	0.99644	0.999998	17961	0	5.5483	0.0035954	0.012582	0.854161	257	4	5.5483
PGAP3	4	0.044144	0.12815	0.97324	2313	2	1.9763	0.0036197	0.012669	0.854161	258	2	1.9763
SLC6A19	4	0.99637	0.99641	0.999998	17960	0	5.8108	0.0036273	0.012699	0.854161	259	4	5.8108
B4GALT4	4	0.67209	0.77382	0.999238	13788	1	6.6959	0.0036309	0.012713	0.854161	260	3	6.6959
HIST1H2AK	4	0.51304	0.66629	0.999238	11869	2	2.6528	0.0036327	0.012719	0.854161	261	2	2.6528
NUP210L	4	0.99635	0.99639	0.999998	17958	0	6.1176	0.0036484	0.012778	0.854161	262	4	6.1176
CNTFR	4	0.9666	0.96674	0.999998	17431	0	6.8605	0.0036553	0.012802	0.854161	263	4	6.8605
CLMN	4	0.93118	0.93145	0.999238	16809	0	6.7843	0.0036645	0.012832	0.854161	264	3	6.7843
EBF4	4	0.5744	0.71848	0.999238	12779	1	-1.0849	0.0036766	0.012872	0.854161	265	1	-1.0849
RPS10	3	0.95925	0.95951	0.999998	17286	0	7.9951	0.0046804	0.012974	0.855695	321	3	7.9951
ZC3H3	4	0.92361	0.92393	0.999238	16662	0	6.7825	0.0037122	0.012989	0.855695	266	3	6.7825
PHF21B	4	0.92318	0.9235	0.999238	16652	0	5.0494	0.0037336	0.013056	0.856167	267	3	5.0494
THRB	4	0.24669	0.44688	0.999238	7904	2	3.7913	0.0037435	0.013092	0.856167	268	2	3.7913
PIAS1	4	0.51968	0.67198	0.999238	11964	2	-0.94298	0.0037905	0.013241	0.858869	269	2	-0.94298
FSTL4	4	0.92674	0.92705	0.999238	16716	0	6.8254	0.0037932	0.013248	0.858869	270	3	6.8254
RPP25	4	0.27642	0.47098	0.999238	8334	2	1.4738	0.0038474	0.013434	0.858869	271	2	1.4738
STXBP6	4	0.92762	0.92792	0.999238	16739	0	6.5143	0.0038481	0.013437	0.858869	272	3	6.5143
DNAL4	3	0.99513	0.99523	0.999998	17940	0	5.9975	0.0048693	0.013462	0.858869	330	3	5.9975
RRM2	4	0.99613	0.99616	0.999998	17957	0	6.2094	0.0038667	0.013488	0.858869	273	4	6.2094
CLDN1	4	0.38504	0.55943	0.999238	9932	1	6.4254	0.0038979	0.013589	0.858869	274	3	6.4254
TWF2	4	0.89533	0.89643	0.999238	16154	1	6.1994	0.0039043	0.013608	0.858869	275	3	6.1994
OSM	4	0.97522	0.97546	0.999998	17572	0	6.6333	0.0039373	0.013722	0.858869	276	4	6.6333
C1orf146	2	0.19724	0.31264	0.996369	6694	1	4.323	0.0071935	0.013724	0.858869	467	1	4.323
MICAL3	4	0.99605	0.99607	0.999998	17956	0	5.8426	0.0039461	0.013745	0.858869	277	4	5.8426
CRX	4	0.40588	0.57667	0.999238	10228	1	6.9604	0.0039534	0.013768	0.858869	278	3	6.9604
APBA2	4	0.045483	0.13053	0.976059	2350	3	-2.4962	0.0039897	0.01391	0.858869	280	1	-2.4962
NFE2L3	4	0.22228	0.41274	0.998782	7332	2	1.1789	0.0039897	0.01391	0.858869	279	2	1.1789
TK1	4	0.22043	0.41009	0.997867	7287	1	6.6462	0.0039905	0.013913	0.858869	281	3	6.6462
SLC25A1	4	0.9401	0.94028	0.999998	16962	0	6.6327	0.003997	0.013938	0.858869	282	3	6.6327
PAPPA	4	0.996	0.99601	0.999998	17955	0	5.5463	0.0039985	0.013942	0.858869	283	4	5.5463
RP11-766F14.2	4	0.84897	0.86078	0.999238	15484	1	7.359	0.00401	0.013992	0.859012	284	3	7.359
PSENEN	4	0.99597	0.99598	0.999998	17954	0	4.9872	0.0040322	0.014064	0.86053	285	4	4.9872
ERVV-2	4	0.78205	0.82175	0.999238	14728	1	6.2487	0.0040467	0.014112	0.860567	286	3	6.2487
EFCC1	4	0.74597	0.8043	0.999238	14401	1	4.7016	0.004075	0.014206	0.861898	287	3	4.7016
MON1B	4	0.18156	0.35338	0.996369	6269	2	3.2024	0.0040897	0.014255	0.861898	288	2	3.2024
CD6	4	0.29575	0.48673	0.999238	8595	1	2.9102	0.0040984	0.014288	0.861898	289	3	2.9102
CCDC28A	4	0.92539	0.92569	0.999238	16699	0	6.0261	0.0041113	0.014325	0.861898	291	3	6.0261
TSR1	4	0.36981	0.54697	0.999238	9701	2	-2.8494	0.0041319	0.014398	0.863409	292	1	-2.8494
DBF4	3	0.99474	0.99484	0.999998	17930	0	6.347	0.005258	0.014515	0.867533	351	3	6.347
C1QTNF2	4	0.060658	0.15763	0.995153	2811	2	1.1119	0.0041888	0.014579	0.868493	293	2	1.1119
XPO4	4	0.87072	0.87633	0.999238	15776	1	4.0833	0.0042457	0.014767	0.871207	294	3	4.0833
SMARCC2	4	0.99575	0.99576	0.999998	17951	0	5.8632	0.0042549	0.014802	0.871207	295	4	5.8632
MAGEB3	4	0.99573	0.99574	0.999998	17950	0	5.4717	0.0042673	0.014839	0.871207	296	4	5.4717
C6orf118	4	0.19107	0.36749	0.996369	6537	2	4.0253	0.0042684	0.014845	0.871207	297	2	4.0253
CCDC7	4	0.99572	0.99573	0.999998	17948	0	5.398	0.0042778	0.014878	0.871207	299	4	5.398
LHX1	4	0.86759	0.87397	0.999238	15732	1	5.9322	0.0043026	0.014958	0.871207	300	3	5.9322
NLGN3	4	0.9957	0.99571	0.999998	17947	0	5.4298	0.0043046	0.014963	0.871207	301	4	5.4298
AMER1	4	0.99565	0.99566	0.999998	17946	0	5.1688	0.0043499	0.015123	0.876476	302	4	5.1688
SMAD3	4	0.21146	0.39732	0.996369	7065	2	-1.2623	0.0043595	0.01515	0.876476	303	1	-1.2623
MMRN1	4	0.44083	0.60557	0.999238	10726	2	3.6418	0.004397	0.015266	0.880381	304	2	3.6418
ZBTB37	4	0.1269	0.26883	0.996369	4751	1	0.43727	0.0044164	0.015325	0.88092	305	2	0.43727
LIPT1	4	0.99554	0.99556	0.999998	17945	0	4.9612	0.0044572	0.015463	0.883257	306	4	4.9612
CLVS2	4	0.038413	0.11445	0.966908	2063	3	-2.1352	0.0044733	0.015526	0.883257	307	1	-2.1352
GABRA1	4	0.96261	0.96271	0.999998	17350	0	6.3806	0.0044867	0.015569	0.883257	308	4	6.3806
P2RX5	4	0.99549	0.99551	0.999998	17944	0	5.5553	0.0045076	0.015636	0.883257	309	4	5.5553
USH2A	4	0.99546	0.99548	0.999998	17943	0	5.4181	0.0045355	0.015736	0.883257	310	4	5.4181
TUSC5	4	0.30722	0.49606	0.999238	8762	1	7.257	0.0045392	0.015753	0.883257	311	3	7.257
OR8S1	4	0.98868	0.98874	0.999998	17831	0	6.5989	0.0045427	0.015762	0.883257	312	4	6.5989
PARP1	4	0.54188	0.69083	0.999238	12290	1	6.4471	0.0045501	0.01579	0.883257	313	3	6.4471
AWAT2	4	0.82944	0.84831	0.999238	15248	1	7.1211	0.0045546	0.015806	0.883257	314	3	7.1211
ZNF891	4	0.99543	0.99545	0.999998	17942	0	5.0485	0.0045715	0.015857	0.883404	315	4	5.0485
TMX1	4	0.043123	0.12626	0.96972	2282	1	2.7851	0.0045871	0.015919	0.883815	316	2	2.7851
MATN3	4	0.94606	0.94623	0.999998	17071	0	4.3612	0.0046001	0.015963	0.883815	317	3	4.3612
WDR13	4	0.098845	0.22323	0.996369	3968	2	2.5003	0.004644	0.016097	0.885055	318	2	2.5003
FGD1	4	0.86561	0.87254	0.999238	15699	1	5.1148	0.0046459	0.016103	0.885055	319	3	5.1148
ADAT1	4	0.9949	0.99494	0.999998	17933	0	6.7341	0.0046544	0.016132	0.885055	320	4	6.7341
KLF14	4	0.30661	0.49554	0.999238	8750	1	6.5441	0.0046939	0.016261	0.889424	322	3	6.5441
SMAD2	4	0.51008	0.66378	0.999238	11811	2	-1.0954	0.0047577	0.016494	0.894665	323	1	-1.0954
ARFGEF2	4	0.56252	0.70848	0.999238	12581	1	6.7546	0.0047643	0.016519	0.894665	324	3	6.7546
CARD11	4	0.1017	0.22787	0.996369	4064	1	6.875	0.004789	0.01661	0.894665	325	3	6.875
NWD1	4	0.69597	0.78304	0.999238	13988	1	6.861	0.004797	0.016638	0.894665	326	3	6.861
ALAS1	4	0.65592	0.76785	0.999238	13665	1	6.6735	0.0048043	0.016661	0.894665	327	3	6.6735
HIST1H3C	4	0.14425	0.29631	0.996369	5255	2	1.2331	0.0048146	0.01669	0.894665	328	2	1.2331
KRTCAP2	4	0.78333	0.82242	0.999238	14742	1	6.4129	0.0048427	0.016772	0.894665	329	3	6.4129
ESRRA	4	0.39866	0.57068	0.999238	10121	1	6.2971	0.0049107	0.016992	0.894665	331	3	6.2971
C22orf43	4	0.17218	0.33934	0.996369	6008	1	7.2048	0.0049127	0.016999	0.894665	332	3	7.2048
PPP3R2	3	0.39808	0.54933	0.999238	10116	1	7.4403	0.006216	0.017022	0.894665	403	2	7.4403
STXBP3	4	0.89695	0.89783	0.999238	16184	1	5.4607	0.0049249	0.017043	0.894665	333	3	5.4607
SMPD1	4	0.99507	0.99512	0.999998	17939	0	4.9975	0.0049266	0.017048	0.894665	334	4	4.9975
KRT20	4	0.13711	0.28509	0.996369	5023	2	2.2143	0.0049284	0.017054	0.894665	335	2	2.2143
AGPAT3	4	0.99505	0.99509	0.999998	17938	0	6.1686	0.0049511	0.017122	0.894665	336	4	6.1686
MARVELD3	4	0.42231	0.59029	0.999238	10454	2	1.5954	0.0049721	0.01719	0.894665	337	2	1.5954
ZNHIT1	4	0.91809	0.91825	0.999238	16565	0	5.8652	0.0049852	0.017235	0.894665	338	3	5.8652
RNF169	4	0.78374	0.82264	0.999238	14746	1	6.5308	0.0050054	0.017293	0.894665	340	3	6.5308
TMEM144	4	0.99497	0.99502	0.999998	17935	0	5.5153	0.0050261	0.017367	0.894665	341	4	5.5153
ZNRF3	4	0.26035	0.45805	0.999238	8113	2	2.3012	0.0050421	0.017425	0.894665	342	2	2.3012
LMOD1	4	0.21001	0.39519	0.996369	7027	1	4.1002	0.0050578	0.017468	0.894665	343	2	4.1002
OR9G1	4	0.4731	0.63264	0.999238	11224	2	2.9308	0.0050625	0.017483	0.894665	344	2	2.9308
TEFM	4	0.99494	0.99498	0.999998	17934	0	5.5848	0.0050628	0.017484	0.894665	345	4	5.5848
TRAT1	3	0.94352	0.9437	0.999998	17025	0	7.662	0.0063923	0.017497	0.894665	414	3	7.662
CRISP3	4	0.5939	0.73526	0.999238	13073	1	1.7743	0.005099	0.017613	0.898039	346	2	1.7743
WISP1	3	0.98318	0.98331	0.999998	17729	0	7.7564	0.0065037	0.017772	0.901866	420	3	7.7564
RRBP1	4	0.61657	0.75418	0.999238	13424	1	2.2603	0.0051558	0.017787	0.901866	347	3	2.2603
TMC7	4	0.47455	0.63384	0.999238	11248	2	3.5947	0.0051923	0.017918	0.905941	348	2	3.5947
MRPS24	4	0.2186	0.40756	0.997606	7248	2	0.97375	0.0052127	0.017989	0.906978	349	2	0.97375
ZNF695	4	0.99476	0.99482	0.999998	17931	0	4.8912	0.0052362	0.018069	0.907363	350	4	4.8912
LCK	4	0.99473	0.99479	0.999998	17929	0	5.7417	0.0052695	0.018178	0.907363	352	4	5.7417
HOXD11	4	0.49877	0.65428	0.999238	11619	1	3.1549	0.0053264	0.018361	0.907363	353	2	3.1549
SNX21	4	0.86009	0.86848	0.999238	15641	1	6.537	0.005327	0.018363	0.907363	354	3	6.537
WWOX	4	0.99466	0.99471	0.999998	17927	0	5.3025	0.0053408	0.018411	0.907363	355	4	5.3025
CD14	4	0.99466	0.99471	0.999998	17928	0	6.1709	0.0053408	0.018411	0.907363	356	4	6.1709
SLC5A5	4	0.366	0.54386	0.999238	9647	1	7.036	0.0053583	0.018461	0.907363	357	3	7.036
LYSMD1	4	0.1708	0.33726	0.996369	5973	1	6.4007	0.005372	0.018503	0.907363	358	3	6.4007
SPHKAP	4	0.16966	0.33552	0.996369	5941	1	5.9035	0.0053777	0.018519	0.907363	359	3	5.9035
SLC39A13	4	0.41945	0.58791	0.999238	10414	2	0.45487	0.0053832	0.018535	0.907363	360	2	0.45487
RMND5B	3	0.37411	0.52372	0.999238	9761	1	5.9699	0.0067915	0.018549	0.907363	438	2	5.9699
RBM48	4	0.31502	0.50244	0.999238	8870	2	3.2774	0.005422	0.018675	0.907377	361	2	3.2774
PIH1D3	4	0.60761	0.74712	0.999238	13300	1	6.7177	0.0054271	0.018697	0.907377	362	3	6.7177
ARF3	4	0.16103	0.3224	0.996369	5705	2	1.5754	0.0054401	0.018742	0.907377	363	2	1.5754
APOBR	3	0.99313	0.99327	0.999998	17903	0	5.6354	0.0068699	0.018767	0.907377	443	3	5.6354
PABPC3	4	0.99452	0.99457	0.999998	17926	0	5.0863	0.0054815	0.018874	0.907377	364	4	5.0863
GKN1	4	0.094943	0.2169	0.996369	3856	3	-1.9039	0.0054969	0.018937	0.907377	365	1	-1.9039
IGSF21	4	0.18885	0.36419	0.996369	6469	1	6.3662	0.0055283	0.019032	0.907377	366	3	6.3662
CYP4A11	3	0.43159	0.58453	0.999238	10593	1	6.2912	0.0069832	0.01906	0.907377	450	2	6.2912
FAM183A	4	0.073298	0.17991	0.995321	3191	1	5.2291	0.0055538	0.019103	0.907377	367	3	5.2291
SS18L1	4	0.68029	0.77696	0.999238	13852	1	6.4664	0.0055623	0.019124	0.907377	368	3	6.4664
TLX3	4	0.99442	0.99446	0.999998	17925	0	5.8377	0.0055845	0.019201	0.907377	369	4	5.8377
CLTA	4	0.85745	0.86661	0.999238	15605	1	4.3197	0.0056106	0.019286	0.907377	370	3	4.3197
FNDC3B	4	0.99436	0.99441	0.999998	17923	0	5.1348	0.0056431	0.01939	0.907377	371	4	5.1348
IGSF10	4	0.99434	0.99438	0.999998	17922	0	6.1873	0.0056631	0.019461	0.907377	372	4	6.1873
SASH1	4	0.94703	0.94721	0.999998	17090	0	5.078	0.0056675	0.019474	0.907377	373	3	5.078
INVS	4	0.72977	0.79707	0.999238	14263	1	6.1443	0.0056716	0.019486	0.907377	374	3	6.1443
GGNBP2	3	0.98001	0.98013	0.999998	17665	0	7.6223	0.0071537	0.019503	0.907377	464	3	7.6223
CYB5R1	4	0.59054	0.73241	0.999238	13023	1	5.3163	0.0056817	0.019521	0.907377	375	3	5.3163
TM9SF2	4	0.0024807	0.0087856	0.838154	178	1	4.9291	0.0056867	0.01954	0.907377	376	3	4.9291
USP6	3	0.59194	0.66217	0.999238	13041	1	7.4854	0.0072082	0.019654	0.907377	470	2	7.4854
MRPS33	4	0.92539	0.92569	0.999238	16689	0	4.1414	0.0057272	0.019679	0.907377	377	2	4.1414
SLC41A1	4	0.56542	0.7109	0.999238	12633	1	5.6009	0.0057424	0.019725	0.907377	378	3	5.6009
B9D1	4	0.94793	0.94811	0.999998	17099	0	6.497	0.0057467	0.019739	0.907377	379	3	6.497
PPP6R3	4	0.99425	0.9943	0.999998	17921	0	5.3722	0.0057532	0.019756	0.907377	380	4	5.3722
KIAA1468	4	0.40588	0.57667	0.999238	10229	1	4.2253	0.0057811	0.019842	0.909019	381	3	4.2253
CDH23	4	0.015334	0.049978	0.925513	936	3	-2.2867	0.005838	0.020022	0.910411	382	1	-2.2867
CLPTM1	4	0.80761	0.83544	0.999238	15001	1	6.0508	0.0058443	0.020045	0.910411	383	3	6.0508
IL5	4	0.43717	0.6025	0.999238	10675	1	4.0475	0.0058546	0.020079	0.910411	384	2	4.0475
SOX17	4	0.85966	0.86817	0.999238	15632	1	6.5363	0.00586	0.020099	0.910411	385	3	6.5363
PEX1	4	0.56311	0.70898	0.999238	12590	1	6.214	0.005887	0.020202	0.910411	386	3	6.214
ARHGEF5	4	0.43054	0.59708	0.999238	10577	2	3.2485	0.0058948	0.02023	0.910411	387	2	3.2485
ALDH1A1	4	0.64584	0.76426	0.999238	13592	1	6.4701	0.0058954	0.020232	0.910411	388	3	6.4701
MID2	4	0.99409	0.99416	0.999998	17920	0	4.9695	0.0059061	0.020276	0.910411	389	4	4.9695
SGTA	4	0.72494	0.79501	0.999238	14223	1	6.8283	0.005942	0.020402	0.910851	390	3	6.8283
MTTP	4	0.47868	0.63733	0.999238	11303	2	2.1064	0.0059516	0.020434	0.910851	391	2	2.1064
RELL2	4	0.994	0.99407	0.999998	17918	0	4.9401	0.0059991	0.02059	0.910851	392	4	4.9401
CHSY3	4	0.77966	0.82051	0.999238	14708	1	4.2065	0.0060084	0.020624	0.910851	393	3	4.2065
IGF2BP3	4	0.9697	0.96982	0.999998	17481	0	5.9916	0.0060248	0.020682	0.910851	394	4	5.9916
CKB	4	0.0089033	0.029865	0.901153	574	2	3.4317	0.0060456	0.020755	0.910851	395	2	3.4317
DHRS11	4	0.20293	0.38482	0.996369	6835	1	4.4685	0.0060653	0.020825	0.910851	396	3	4.4685
CHI3L2	4	0.8348	0.85165	0.999238	15314	1	6.5539	0.0061208	0.020995	0.910851	397	3	6.5539
ACMSD	4	0.24881	0.44862	0.999238	7943	1	6.4717	0.0061251	0.02101	0.910851	398	3	6.4717
TACC2	4	0.99386	0.99391	0.999998	17916	0	5.3874	0.0061406	0.021064	0.910851	399	4	5.3874
BACE1	4	0.99385	0.9939	0.999998	17915	0	5.8545	0.0061481	0.02109	0.910851	400	4	5.8545
C7orf31	4	0.99383	0.99388	0.999998	17914	0	6.1563	0.0061682	0.021153	0.910851	401	4	6.1563
ACER3	4	0.037564	0.11222	0.966908	2021	2	-0.12296	0.0061789	0.021183	0.910851	402	2	-0.12296
SCG5	3	0.89544	0.89544	0.999238	16157	0	7.4559	0.007831	0.021266	0.910851	507	3	7.4559
TOPORS	3	0.99217	0.99227	0.999998	17888	0	7.3493	0.0078339	0.021276	0.910851	508	3	7.3493
HSF1	4	0.99376	0.99381	0.999998	17913	0	5.0443	0.0062388	0.021373	0.910851	404	4	5.0443
EIF3L	4	0.19919	0.3793	0.996369	6740	1	6.2741	0.0062821	0.021506	0.910851	405	3	6.2741
TMEM39A	4	0.6918	0.78141	0.999238	13949	1	6.4542	0.0062842	0.021511	0.910851	406	3	6.4542
DEXI	4	0.28364	0.47689	0.999238	8449	2	2.5927	0.0062871	0.021517	0.910851	407	2	2.5927
TAS2R1	3	0.99207	0.99217	0.999998	17885	0	7.2675	0.0079305	0.021525	0.910851	515	3	7.2675
PIK3AP1	4	0.24401	0.44319	0.999238	7845	3	-1.5554	0.0062925	0.021535	0.910851	408	1	-1.5554
KRT2	4	0.25484	0.45349	0.999238	8028	1	6.5407	0.0062951	0.02154	0.910851	409	3	6.5407
HPD	4	0.9937	0.99374	0.999998	17912	0	5.5028	0.0063024	0.021562	0.910851	410	4	5.5028
CDH16	4	0.20897	0.39371	0.996369	6997	2	1.4237	0.0063493	0.021716	0.910851	411	2	1.4237
NOTCH2	4	0.99363	0.99367	0.999998	17911	0	6.4592	0.0063704	0.021789	0.910851	412	4	6.4592
ARAP1	4	0.68505	0.77881	0.999238	13895	1	6.5232	0.0063881	0.021845	0.910851	413	3	6.5232
PRAM1	4	0.36116	0.53988	0.999238	9587	1	5.4385	0.0064062	0.021909	0.910851	415	3	5.4385
TMEM105	4	0.56641	0.71174	0.999238	12648	2	3.7638	0.0064256	0.021966	0.910851	416	2	3.7638
C1orf137	4	0.28465	0.47767	0.999238	8459	1	6.3356	0.0064593	0.02207	0.910851	417	3	6.3356
PHGDH	4	0.99353	0.99358	0.999998	17910	0	5.0115	0.0064687	0.022094	0.910851	418	4	5.0115
BBIP1	4	0.51009	0.66379	0.999238	11819	1	6.4035	0.0064836	0.022143	0.910851	419	3	6.4035
SSTR3	4	0.31651	0.50366	0.999238	8898	2	1.9952	0.0065198	0.022265	0.910851	422	2	1.9952
RHD	4	0.99347	0.99353	0.999998	17908	0	4.9533	0.0065262	0.022285	0.910851	423	4	4.9533
RGS21	3	0.97787	0.97803	0.999998	17630	0	7.547	0.0082477	0.022331	0.910851	536	3	7.547
FAM19A4	4	0.99346	0.99351	0.999998	17907	0	5.4971	0.006542	0.022341	0.910851	424	4	5.4971
HCST	4	0.34335	0.52538	0.999238	9303	1	7.0953	0.0065709	0.022435	0.910851	425	3	7.0953
TENM3	4	0.84316	0.85689	0.999238	15410	1	3.6701	0.0065817	0.022464	0.910851	426	2	3.6701
H2AFY2	4	0.2853	0.47821	0.999238	8470	2	1.0915	0.006605	0.022542	0.910851	428	2	1.0915
RALGAPB	4	0.86291	0.87053	0.999238	15673	1	6.2311	0.006605	0.022542	0.910851	427	3	6.2311
FTH1	1	0.97737	0.97746	0.999998	17622	0	9.0907	0.022625	0.022577	0.910851	1307	1	9.0907
GPR141	4	0.50282	0.65769	0.999238	11694	1	6.6289	0.006634	0.022646	0.910851	429	3	6.6289
CWC22	4	0.99333	0.99338	0.999998	17906	0	5.4409	0.0066676	0.022769	0.910851	430	4	5.4409
FNDC3A	4	0.49359	0.6499	0.999238	11527	1	6.4056	0.0066757	0.022791	0.910851	431	3	6.4056
WNK4	4	0.99332	0.99336	0.999998	17905	0	5.9349	0.0066849	0.022822	0.910851	432	4	5.9349
FES	4	0.36246	0.54096	0.999238	9602	2	1.2055	0.0066902	0.022846	0.910851	433	2	1.2055
PABPN1L	4	0.9933	0.99334	0.999998	17904	0	5.2872	0.0067023	0.022878	0.910851	434	4	5.2872
RNF214	4	0.85581	0.86545	0.999238	15579	1	5.6679	0.0067342	0.022997	0.910851	435	3	5.6679
SLC22A3	4	0.11297	0.24644	0.996369	4366	3	-3.7214	0.0067469	0.02304	0.910851	436	1	-3.7214
ZNF530	4	0.87292	0.87802	0.999238	15813	1	6.1569	0.0067549	0.023063	0.910851	437	3	6.1569
FAM132A	4	0.29322	0.48465	0.999238	8569	2	1.3743	0.0068037	0.023215	0.910851	439	2	1.3743
ZNF135	4	0.82548	0.84581	0.999238	15199	1	6.4561	0.0068187	0.023262	0.910851	440	3	6.4561
ADAD2	4	0.56164	0.70774	0.999238	12566	2	3.6911	0.0068331	0.023298	0.910851	441	2	3.6911
FOXK1	4	0.58938	0.73141	0.999238	13003	1	6.2368	0.0068605	0.023391	0.910851	442	3	6.2368
SEC14L4	4	0.49298	0.64941	0.999238	11514	2	3.5375	0.0068939	0.023487	0.910851	444	2	3.5375
NCF2	4	0.17676	0.34614	0.996369	6135	2	3.6295	0.0068994	0.023507	0.910851	445	2	3.6295
TACO1	4	0.26982	0.46567	0.999238	8245	2	1.8561	0.0069173	0.023556	0.910851	446	2	1.8561
FAM47B	4	0.42319	0.59104	0.999238	10471	1	6.2709	0.0069336	0.023615	0.910851	447	3	6.2709
FAM115C	4	0.1344	0.2808	0.996369	4966	1	6.3595	0.0069428	0.023642	0.910851	448	3	6.3595
DAPP1	4	0.48029	0.63869	0.999238	11320	2	2.0257	0.0069741	0.023755	0.910851	449	2	2.0257
NDUFB6	4	0.38974	0.56327	0.999238	9993	2	3.1032	0.0069939	0.023823	0.910851	451	2	3.1032
CABLES2	4	0.59696	0.73788	0.999238	13120	2	3.0018	0.0070309	0.023941	0.910851	453	2	3.0018
LANCL3	4	0.99296	0.993	0.999998	17900	0	6.2093	0.0070359	0.023955	0.910851	454	4	6.2093
SPP2	3	0.4333	0.58527	0.999238	10620	1	6.4319	0.0088995	0.023966	0.910851	577	2	6.4319
THBD	4	0.24324	0.44214	0.999238	7823	1	6.5004	0.0070614	0.024043	0.910851	455	3	6.5004
ABCC12	4	0.77851	0.81992	0.999238	14698	1	6.3327	0.0070637	0.024047	0.910851	456	3	6.3327
TPRKB	4	0.72362	0.79448	0.999238	14210	1	6.1793	0.007066	0.024056	0.910851	457	3	6.1793
HOXA2	4	0.99292	0.99296	0.999998	17899	0	4.9932	0.0070776	0.024097	0.910851	458	4	4.9932
SYNE2	4	0.59548	0.73663	0.999238	13095	1	3.5777	0.0070877	0.024125	0.910851	459	2	3.5777
RAD51D	4	0.62044	0.75547	0.999238	13447	1	6.383	0.00712	0.024237	0.910851	460	3	6.383
DPEP1	4	0.72566	0.79535	0.999238	14234	1	5.9638	0.0071226	0.024251	0.910851	461	3	5.9638
GTF2H3	4	0.32889	0.51365	0.999238	9092	1	6.8398	0.0071341	0.024285	0.910851	462	3	6.8398
PRDM10	4	0.088275	0.20574	0.996369	3677	1	3.811	0.0071444	0.024316	0.910851	463	3	3.811
DUSP15	4	0.71837	0.79221	0.999238	14169	1	7.1106	0.00716	0.024372	0.910851	465	3	7.1106
SGCG	4	0.99282	0.99286	0.999998	17898	0	5.5051	0.0071756	0.024418	0.910851	466	4	5.5051
ZNF239	4	0.19595	0.37455	0.996369	6659	3	-1.3503	0.0072012	0.024494	0.910851	468	1	-1.3503
MPV17	4	0.9928	0.99284	0.999998	17897	0	5.2819	0.0072024	0.024499	0.910851	469	4	5.2819
GFM2	4	0.81462	0.83943	0.999238	15074	1	6.1614	0.0072191	0.024545	0.910851	472	3	6.1614
CRKL	4	0.71945	0.79268	0.999238	14178	1	-0.37367	0.007258	0.024673	0.910851	473	3	-0.37367
ZNF668	4	0.99272	0.99276	0.999998	17895	0	4.7131	0.0072818	0.024746	0.910851	474	4	4.7131
SPDYC	4	0.99272	0.99276	0.999998	17894	0	5.5626	0.0072832	0.02475	0.910851	475	4	5.5626
VTCN1	4	0.63417	0.76017	0.999238	13533	1	7.1229	0.0072856	0.024757	0.910851	476	3	7.1229
AMELY	4	0.9927	0.99274	0.999998	17893	0	5.1863	0.0072989	0.0248	0.910851	477	4	5.1863
DDX5	4	0.85015	0.86156	0.999238	15503	1	3.6103	0.0073147	0.024845	0.910851	478	3	3.6103
TH	4	0.97724	0.97752	0.999998	17616	0	6.6484	0.007331	0.024897	0.910851	479	4	6.6484
PURB	4	0.80566	0.83435	0.999238	14980	1	5.8756	0.0073378	0.024916	0.910851	480	3	5.8756
RBP1	4	0.040967	0.12122	0.967559	2196	1	5.4179	0.0073607	0.024981	0.910851	481	3	5.4179
CACNB3	4	0.82844	0.84769	0.999238	15233	1	6.5476	0.0073814	0.02505	0.910851	482	3	6.5476
UBE2D4	4	0.8722	0.87746	0.999238	15801	1	5.6444	0.0073835	0.025054	0.910851	483	3	5.6444
COPS8	4	0.057592	0.15222	0.987212	2722	1	4.0857	0.0074283	0.0252	0.910851	484	3	4.0857
GRID2	4	0.99229	0.99232	0.999998	17891	0	6.4745	0.0074562	0.025289	0.910851	485	4	6.4745
TRAF6	4	0.9712	0.97139	0.999998	17509	0	6.5756	0.0075157	0.025486	0.910851	486	4	6.5756
NT5E	4	0.69623	0.78314	0.999238	13991	1	6.1665	0.0075364	0.025542	0.910851	487	3	6.1665
SNCA	4	0.26674	0.46324	0.999238	8209	2	1.2524	0.0075418	0.025555	0.910851	488	2	1.2524
ANXA9	4	0.38171	0.55665	0.999238	9883	1	6.5219	0.007551	0.025587	0.910851	489	3	6.5219
JPH1	4	0.12654	0.26825	0.996369	4744	1	6.8955	0.0075734	0.025654	0.910851	490	3	6.8955
SH3GL1	4	0.48176	0.63987	0.999238	11340	1	6.6999	0.007595	0.025724	0.910851	491	3	6.6999
IFRD2	4	0.98808	0.98815	0.999998	17820	0	6.6572	0.007614	0.025773	0.910851	492	4	6.6572
ZDHHC4	4	0.97983	0.98003	0.999998	17661	0	6.4031	0.0076367	0.025839	0.910851	494	4	6.4031
NRIP2	4	0.99236	0.99239	0.999998	17892	0	5.9108	0.0076367	0.025839	0.910851	493	4	5.9108
KRTCAP3	4	0.36563	0.54354	0.999238	9643	2	3.1747	0.0076547	0.025893	0.910851	495	2	3.1747
TGDS	4	0.5314	0.68193	0.999238	12129	1	6.4127	0.007681	0.025962	0.910851	496	3	6.4127
KRTAP13-3	4	0.25957	0.45744	0.999238	8102	1	6.0715	0.0076896	0.025986	0.910851	497	3	6.0715
WNT6	4	0.96305	0.96316	0.999998	17360	0	6.1125	0.0076933	0.025997	0.910851	498	4	6.1125
PYHIN1	4	0.99229	0.99232	0.999998	17890	0	5.9069	0.0077062	0.026041	0.910851	499	4	5.9069
GPR55	4	0.98183	0.98195	0.999998	17696	0	6.6682	0.0077082	0.026045	0.910851	500	4	6.6682
FOXC2	4	0.58753	0.72982	0.999238	12969	2	2.0662	0.0077121	0.026057	0.910851	501	2	2.0662
GUSB	4	0.21001	0.39519	0.996369	7026	2	2.8213	0.0077688	0.026238	0.910851	502	2	2.8213
CR1	3	0.87996	0.87991	0.999238	15924	0	7.3413	0.0097913	0.026289	0.910851	622	2	7.3413
INSC	4	0.99221	0.99225	0.999998	17889	0	6.01	0.0077852	0.02629	0.910851	503	4	6.01
CRTAM	4	0.20382	0.38611	0.996369	6865	1	5.2085	0.0077949	0.026319	0.910851	504	3	5.2085
RPL22	2	0.98596	0.98603	0.999998	17783	0	6.9179	0.014044	0.02634	0.910851	845	2	6.9179
DYRK4	4	0.88487	0.88747	0.999238	15985	1	3.7118	0.0078243	0.026417	0.910851	505	2	3.7118
SLC35D3	4	0.94149	0.94165	0.999998	16993	0	6.6183	0.0078256	0.026419	0.910851	506	3	6.6183
MKRN1	4	0.97684	0.97711	0.999998	17606	0	6.7281	0.0078361	0.026454	0.910851	509	4	6.7281
IL24	4	0.99214	0.99218	0.999998	17887	0	5.3884	0.0078588	0.026528	0.910851	510	4	5.3884
THAP10	4	0.59054	0.73241	0.999238	13024	1	6.2471	0.0078699	0.026559	0.910851	511	3	6.2471
FAM47C	4	0.51502	0.668	0.999238	11899	1	2.8986	0.0078823	0.026599	0.910851	512	3	2.8986
CSN3	4	0.99211	0.99214	0.999998	17886	0	5.9771	0.007895	0.026642	0.910851	513	4	5.9771
ATRN	4	0.038171	0.11383	0.966908	2046	1	2.0778	0.0079068	0.026682	0.910851	514	2	2.0778
EPHX4	4	0.99206	0.9921	0.999998	17884	0	5.1024	0.0079359	0.026771	0.910851	516	4	5.1024
C6orf52	4	0.82272	0.84419	0.999238	15164	1	4.5419	0.007939	0.026779	0.910851	517	3	4.5419
RIIAD1	4	0.26046	0.45815	0.999238	8115	1	5.9524	0.007972	0.026884	0.910851	518	3	5.9524
PSMC3	4	0.86528	0.8723	0.999238	15695	1	5.527	0.0079958	0.026961	0.910851	519	3	5.527
ORC5	4	0.992	0.99204	0.999998	17883	0	5.4766	0.0079998	0.026973	0.910851	520	4	5.4766
DHODH	4	0.41664	0.58563	0.999238	10371	1	3.0456	0.0080525	0.027132	0.910851	521	3	3.0456
CYTH4	3	0.59591	0.66437	0.999238	13100	1	6.0728	0.010133	0.027144	0.910851	639	2	6.0728
KRBOX4	1	0.97275	0.97285	0.999998	17536	0	8.5362	0.027249	0.027179	0.910851	1536	1	8.5362
ASB7	4	0.99191	0.99194	0.999998	17882	0	5.9764	0.0080949	0.027274	0.910851	522	4	5.9764
ACTR3B	4	0.27904	0.47313	0.999238	8380	2	2.6593	0.0081092	0.027316	0.910851	523	2	2.6593
ANKDD1B	4	0.99188	0.99192	0.999998	17881	0	4.6711	0.008118	0.027348	0.910851	524	4	4.6711
TUSC3	4	0.91481	0.91502	0.999238	16512	0	6.2077	0.0081205	0.027354	0.910851	525	3	6.2077
SDHB	4	0.99103	0.99106	0.999998	17872	0	6.8003	0.008123	0.027359	0.910851	526	4	6.8003
LPIN3	4	0.6718	0.77373	0.999238	13787	1	6.5663	0.0081256	0.027363	0.910851	527	3	6.5663
CXCL6	1	0.97251	0.97262	0.999998	17533	0	8.635	0.027492	0.027413	0.910851	1548	1	8.635
PDXP	4	0.70667	0.78732	0.999238	14082	1	6.1963	0.0081537	0.027445	0.910851	528	3	6.1963
TCF3	4	0.99184	0.99189	0.999998	17880	0	5.2252	0.0081567	0.027453	0.910851	529	4	5.2252
ZNF615	4	0.1242	0.26454	0.996369	4683	2	2.6734	0.0081628	0.027472	0.910851	530	2	2.6734
SERPINB12	4	0.92357	0.92388	0.999238	16661	0	5.1201	0.008166	0.027487	0.910851	531	3	5.1201
SCRIB	3	0.79127	0.79505	0.999238	14821	1	7.4021	0.010271	0.02749	0.910851	649	2	7.4021
ZNF521	4	0.34568	0.52729	0.999238	9336	1	5.6876	0.0081748	0.027514	0.910851	532	3	5.6876
PPP1R17	4	0.98759	0.98765	0.999998	17809	0	6.2756	0.0082103	0.027621	0.910851	533	4	6.2756
KDELR3	4	0.91673	0.91693	0.999238	16547	0	4.7287	0.0082109	0.027622	0.910851	534	3	4.7287
NDUFV1	4	0.25137	0.45065	0.999238	7972	2	0.95319	0.0082227	0.027647	0.910851	535	2	0.95319
LMAN2L	4	0.98331	0.98341	0.999998	17732	0	6.7329	0.0082593	0.027771	0.910851	537	4	6.7329
SPINK4	4	0.8553	0.8651	0.999238	15574	1	6.1603	0.008267	0.027797	0.910851	538	3	6.1603
KRTAP4-1	4	0.99173	0.99177	0.999998	17879	0	5.577	0.0082673	0.027798	0.910851	539	4	5.577
MAOA	4	0.88514	0.8877	0.999238	15991	1	5.7426	0.0083195	0.027958	0.910851	540	3	5.7426
AHSG	3	0.61694	0.67604	0.999238	13426	1	7.364	0.010469	0.028001	0.910851	657	2	7.364
TMEM176A	4	0.091812	0.21169	0.996369	3764	2	0.13815	0.0083362	0.02801	0.910851	541	2	0.13815
GPR50	4	0.61802	0.75468	0.999238	13431	1	6.0474	0.0083474	0.028046	0.910851	542	3	6.0474
DPRX	4	0.47908	0.63768	0.999238	11308	1	2.6783	0.008368	0.028113	0.910851	543	2	2.6783
PACS1	4	0.42819	0.59518	0.999238	10543	2	1.8616	0.0083929	0.028184	0.910851	544	2	1.8616
RFFL	4	0.91577	0.91596	0.999238	16522	0	6.6957	0.0084048	0.028218	0.910851	545	3	6.6957
ANK2	4	0.54397	0.69262	0.999238	12319	2	3.4668	0.0084166	0.028255	0.910851	546	2	3.4668
TRIM10	4	0.58852	0.73066	0.999238	12987	1	5.5978	0.0084401	0.028333	0.910851	547	3	5.5978
STPG2	4	0.20339	0.38547	0.996369	6844	1	5.0141	0.0084496	0.028372	0.910851	548	3	5.0141
MUC6	4	0.89978	0.90041	0.999238	16243	1	5.7929	0.0084654	0.028426	0.910851	549	3	5.7929
CEP128	4	0.99152	0.99156	0.999998	17878	0	5.5713	0.0084806	0.028473	0.910851	550	4	5.5713
MTR	4	0.2715	0.46703	0.999238	8267	1	5.7343	0.0085063	0.02856	0.910851	551	3	5.7343
FRG2C	1	0.97132	0.97146	0.999998	17512	0	8.5402	0.028676	0.028561	0.910851	1606	1	8.5402
TXNIP	4	0.96319	0.9633	0.999998	17367	0	6.2423	0.0085071	0.028562	0.910851	552	4	6.2423
GLCCI1	4	0.97982	0.98002	0.999998	17660	0	6.0981	0.0085519	0.028709	0.910851	553	4	6.0981
GTF2IRD1	4	0.11428	0.24853	0.996369	4409	2	0.283	0.008563	0.028743	0.910851	554	2	0.283
LYRM1	4	0.72494	0.79501	0.999238	14222	1	4.8317	0.0086186	0.028929	0.910851	555	3	4.8317
TIPRL	4	0.95345	0.95361	0.999998	17192	0	6.8536	0.0086261	0.028962	0.910851	556	4	6.8536
CCDC53	3	0.91252	0.9126	0.999238	16466	0	7.1114	0.010898	0.029128	0.910851	690	3	7.1114
H1FOO	4	0.99133	0.99136	0.999998	17877	0	5.0531	0.008672	0.029133	0.910851	557	4	5.0531
KRT33B	4	0.9758	0.97606	0.999998	17587	0	6.6935	0.008674	0.029138	0.910851	558	4	6.6935
FIGN	4	0.88499	0.88757	0.999238	15987	1	5.2057	0.0086765	0.029144	0.910851	559	3	5.2057
CSDC2	4	0.59911	0.73974	0.999238	13162	1	6.0336	0.0086926	0.029196	0.910851	560	3	6.0336
MAP4K3	4	0.23538	0.43126	0.999238	7624	1	5.3345	0.0087332	0.02932	0.910851	561	3	5.3345
SDC3	4	0.012584	0.041453	0.911792	777	2	0.89995	0.0087545	0.029394	0.910851	562	2	0.89995
ATP9A	4	0.51053	0.66415	0.999238	11826	1	6.5266	0.0087676	0.029441	0.910851	563	3	6.5266
C5AR2	4	0.98195	0.98206	0.999998	17701	0	6.3575	0.0087731	0.029465	0.910851	564	4	6.3575
DAG1	4	0.99122	0.99126	0.999998	17876	0	5.5667	0.0087796	0.029485	0.910851	565	4	5.5667
APOA2	4	0.11128	0.2437	0.996369	4323	2	1.6165	0.0087899	0.029524	0.910851	566	2	1.6165
TMEM139	4	0.95949	0.95965	0.999998	17291	0	5.6699	0.0087917	0.029526	0.910851	567	4	5.6699
SYNC	4	0.59003	0.73196	0.999238	13013	1	6.4825	0.0087972	0.029548	0.910851	568	3	6.4825
TRMT1L	4	0.70217	0.78552	0.999238	14044	1	6.5373	0.0087999	0.029558	0.910851	569	3	6.5373
CBR4	4	0.99118	0.9912	0.999998	17875	0	5.7019	0.0088189	0.029612	0.910851	570	4	5.7019
MESP2	4	0.99116	0.99118	0.999998	17874	0	5.2714	0.0088403	0.029664	0.910851	571	4	5.2714
MYOC	4	0.47505	0.63426	0.999238	11255	2	2.4888	0.0088466	0.029685	0.910851	572	2	2.4888
C1orf116	4	0.98616	0.98623	0.999998	17785	0	6.5877	0.0088484	0.029692	0.910851	573	4	6.5877
DIRC1	4	0.98346	0.98355	0.999998	17736	0	6.3284	0.0088619	0.029738	0.910851	574	4	6.3284
COPZ1	4	0.36295	0.54137	0.999238	9607	1	6.2466	0.0088781	0.029788	0.910851	575	3	6.2466
MNX1	4	0.3054	0.49454	0.999238	8738	2	3.4859	0.0088789	0.029791	0.910851	576	2	3.4859
ITFG1	4	0.0027758	0.0097828	0.838154	202	2	0.80351	0.0089033	0.029865	0.910851	578	2	0.80351
IFI30	4	0.87053	0.87619	0.999238	15774	1	6.3931	0.0089134	0.029897	0.910851	579	3	6.3931
IZUMO3	4	0.99107	0.99109	0.999998	17873	0	5.2721	0.0089345	0.02996	0.910851	580	4	5.2721
GAS2L3	4	0.7528	0.80751	0.999238	14459	1	6.636	0.0089378	0.029967	0.910851	581	3	6.636
MAGIX	4	0.43023	0.59684	0.999238	10573	2	1.9563	0.00896	0.030043	0.910851	582	2	1.9563
LAMP5	4	0.95307	0.95324	0.999998	17188	0	6.0325	0.0089677	0.030072	0.910851	583	4	6.0325
RFPL3S	4	0.98919	0.98924	0.999998	17840	0	6.1959	0.009025	0.030262	0.910851	584	4	6.1959
TMEM41B	4	0.765	0.81323	0.999238	14557	1	6.2485	0.0090293	0.030275	0.910851	585	3	6.2485
ECT2L	4	0.99096	0.99099	0.999998	17870	0	5.5461	0.0090411	0.030313	0.910851	586	4	5.5461
SGSH	4	0.22744	0.42002	0.999238	7437	2	-1.8195	0.009045	0.030327	0.910851	587	2	-1.8195
OMD	3	0.9886	0.98873	0.999998	17830	0	5.8162	0.011398	0.03034	0.910851	714	3	5.8162
SLC23A1	3	0.98853	0.98865	0.999998	17827	0	5.1969	0.011472	0.030513	0.910851	718	3	5.1969
CMC1	2	0.88218	0.88205	0.999238	15953	0	7.122	0.016414	0.030517	0.910851	974	2	7.122
RANBP9	4	0.56629	0.71163	0.999238	12644	1	6.7795	0.0091049	0.030522	0.910851	588	3	6.7795
FIG4	4	0.99087	0.9909	0.999998	17869	0	6.1738	0.0091284	0.030601	0.910851	589	4	6.1738
PTBP1	4	0.12123	0.25978	0.996369	4596	3	-1.606	0.0091301	0.030604	0.910851	590	1	-1.606
ST3GAL1	4	0.99086	0.99088	0.999998	17868	0	4.6655	0.0091436	0.030642	0.910851	591	4	4.6655
LYN	4	0.31791	0.50479	0.999238	8917	1	5.939	0.0091597	0.030693	0.910851	592	3	5.939
SAMD13	4	0.68065	0.77711	0.999238	13856	1	6.132	0.0091679	0.030727	0.910851	593	3	6.132
LCE3A	4	0.28478	0.47778	0.999238	8462	1	6.4172	0.0091682	0.030728	0.910851	594	3	6.4172
PAQR6	4	0.10268	0.22943	0.996369	4096	2	2.8645	0.0091745	0.030752	0.910851	595	2	2.8645
AAED1	4	0.35119	0.53185	0.999238	9421	2	1.3426	0.0091867	0.030787	0.910851	596	2	1.3426
FAM196B	4	0.61267	0.75151	0.999238	13369	2	3.2465	0.0091999	0.030833	0.910851	597	2	3.2465
VARS2	4	0.015407	0.0502	0.925513	939	2	1.4006	0.0092434	0.030979	0.912761	598	2	1.4006
TMEM116	4	0.028727	0.088187	0.957808	1624	2	2.3165	0.0092698	0.031058	0.912761	599	2	2.3165
EXOSC7	4	0.99071	0.99075	0.999998	17867	0	5.3694	0.0092896	0.031123	0.912761	600	4	5.3694
TLR2	4	0.9907	0.99074	0.999998	17866	0	5.2243	0.0092965	0.031143	0.912761	601	4	5.2243
KIRREL	4	0.99069	0.99073	0.999998	17865	0	5.303	0.0093067	0.031177	0.912761	602	4	5.303
PRDM5	4	0.66511	0.77121	0.999238	13741	1	6.8011	0.0093144	0.031201	0.912761	603	3	6.8011
LY6G5C	4	0.99065	0.99068	0.999998	17863	0	5.1149	0.0093513	0.031308	0.91365	604	4	5.1149
CACNA1G	4	0.59851	0.73922	0.999238	13151	2	1.4038	0.0093568	0.031332	0.91365	605	2	1.4038
AHNAK	4	0.99062	0.99065	0.999998	17862	0	5.3689	0.0093805	0.03141	0.914444	606	4	5.3689
PORCN	4	0.2932	0.48464	0.999238	8567	2	3.0568	0.0094425	0.031601	0.918129	607	2	3.0568
XYLT1	4	0.40329	0.57456	0.999238	10184	2	1.7575	0.0094701	0.031697	0.918129	608	2	1.7575
KLHL32	4	0.8234	0.84461	0.999238	15173	1	6.1551	0.0094919	0.031765	0.918129	609	3	6.1551
CAMSAP1	4	0.49469	0.65082	0.999238	11554	2	3.6275	0.009494	0.031769	0.918129	610	2	3.6275
CALHM2	4	0.81531	0.83983	0.999238	15085	1	6.4126	0.0095133	0.031832	0.918129	611	3	6.4126
ZYG11A	4	0.92539	0.92569	0.999238	16692	0	5.629	0.009565	0.032004	0.918129	612	3	5.629
ZNF91	1	0.96788	0.96812	0.999998	17449	0	8.1684	0.032115	0.032031	0.918129	1774	1	8.1684
RFX2	4	0.94321	0.94341	0.999998	17020	0	5.7474	0.0095779	0.032048	0.918129	613	3	5.7474
RPUSD2	4	0.33895	0.52184	0.999238	9245	1	2.9469	0.0095835	0.032062	0.918129	614	3	2.9469
ITGB5	4	0.35078	0.53152	0.999238	9414	1	3.4915	0.0096103	0.032143	0.918129	615	2	3.4915
ACLY	3	0.021295	0.054793	0.927772	1266	1	5.0493	0.01213	0.032173	0.918129	741	2	5.0493
ZNF398	3	0.91692	0.91697	0.999238	16552	0	7.2173	0.012149	0.032206	0.918129	745	3	7.2173
INTS6	4	0.22563	0.41747	0.999238	7401	2	-4.3009	0.0096402	0.032247	0.918129	616	2	-4.3009
FBXO44	4	0.99036	0.99039	0.999998	17861	0	5.482	0.0096413	0.032249	0.918129	617	4	5.482
C17orf53	4	0.95741	0.95755	0.999998	17258	0	4.6241	0.0096968	0.032431	0.921845	618	4	4.6241
IGF1	4	0.24058	0.43847	0.999238	7755	2	2.9376	0.0097337	0.032543	0.922383	619	2	2.9376
PRDX5	4	0.93369	0.93386	0.999238	16847	0	4.2524	0.0097402	0.032566	0.922383	620	3	4.2524
CHMP4B	4	0.13343	0.27921	0.996369	4938	2	2.5435	0.0097535	0.032603	0.922383	621	2	2.5435
GIGYF1	4	0.21836	0.40721	0.997606	7243	2	2.8493	0.009799	0.03274	0.924337	623	2	2.8493
BPIFB4	4	0.19107	0.36749	0.996369	6535	1	3.4933	0.0098102	0.032776	0.924337	624	3	3.4933
INF2	4	0.56639	0.71171	0.999238	12646	1	6.5882	0.009826	0.032825	0.924337	625	3	6.5882
KIR2DL4	4	0.17733	0.34702	0.996369	6149	3	-1.3354	0.0098668	0.032946	0.926003	626	1	-1.3354
KIAA0930	4	0.9901	0.99011	0.999998	17860	0	4.6243	0.0098984	0.033048	0.926003	627	4	4.6243
GLG1	4	0.81834	0.84161	0.999238	15118	1	3.1973	0.0099235	0.033126	0.926003	628	3	3.1973
NEK3	4	0.99007	0.99008	0.999998	17859	0	5.9646	0.0099307	0.033145	0.926003	629	4	5.9646
PPP1R3E	4	0.36606	0.5439	0.999238	9648	1	6.6873	0.0099361	0.033159	0.926003	630	3	6.6873
KLF1	4	0.0057323	0.019691	0.870736	394	2	2.1399	0.0099499	0.033205	0.926003	631	2	2.1399
FAM96A	4	0.98999	0.99	0.999998	17857	0	4.7334	0.010006	0.033383	0.926003	632	4	4.7334
PLEKHD1	4	0.36052	0.53936	0.999238	9574	2	-1.9509	0.010008	0.033389	0.926003	633	1	-1.9509
NPLOC4	4	0.84047	0.85517	0.999238	15379	1	6.7502	0.010016	0.03341	0.926003	634	3	6.7502
MS4A4E	4	0.72502	0.79505	0.999238	14224	1	3.081	0.010069	0.033582	0.926003	635	3	3.081
RAB39B	4	0.98992	0.98992	0.999998	17856	0	4.8616	0.010079	0.033606	0.926003	636	4	4.8616
TMEM131	4	0.97407	0.9743	0.999998	17558	0	6.3969	0.010112	0.033701	0.926003	637	4	6.3969
CDS1	4	0.61162	0.75062	0.999238	13354	1	4.9211	0.010122	0.033738	0.926003	638	3	4.9211
WDR20	4	0.94639	0.94657	0.999998	17078	0	5.1713	0.010142	0.033797	0.926003	640	3	5.1713
TMEM67	4	0.98984	0.98984	0.999998	17855	0	5.0747	0.010159	0.033849	0.926003	641	4	5.0747
ANKRD22	4	0.94069	0.94086	0.999998	16974	0	6.5234	0.010162	0.033861	0.926003	642	3	6.5234
NMRK1	4	0.61082	0.74992	0.999238	13337	2	3.6346	0.010168	0.033884	0.926003	643	2	3.6346
KIAA1324L	4	0.51008	0.66378	0.999238	11812	2	3.2868	0.010175	0.033902	0.926003	644	2	3.2868
SLITRK2	4	0.20397	0.38634	0.996369	6869	2	0.54985	0.010207	0.034008	0.926003	645	2	0.54985
AKIRIN1	4	0.92365	0.92396	0.999238	16663	0	6.844	0.010215	0.034031	0.926003	647	3	6.844
OAZ1	4	0.95294	0.9531	0.999998	17185	0	5.8322	0.010255	0.03416	0.926003	648	4	5.8322
SRSF3	3	0.98698	0.98711	0.999998	17797	0	6.1333	0.013016	0.034354	0.926003	787	3	6.1333
THY1	4	0.0038475	0.013435	0.853311	274	3	-2.9182	0.01032	0.034382	0.926003	650	1	-2.9182
WDR52	4	0.98968	0.98969	0.999998	17853	0	5.3773	0.010321	0.034382	0.926003	651	4	5.3773
CWF19L1	1	0.96544	0.96576	0.999998	17417	0	8.3205	0.034555	0.034462	0.926003	1890	1	8.3205
DOC2A	4	0.57454	0.71859	0.999238	12785	2	3.4892	0.010349	0.03448	0.926003	652	2	3.4892
COMT	4	0.98965	0.98966	0.999998	17852	0	5.0286	0.01035	0.034484	0.926003	653	4	5.0286
OR10P1	4	0.98965	0.98966	0.999998	17851	0	5.4175	0.010352	0.03449	0.926003	654	4	5.4175
CLRN3	4	0.83141	0.84955	0.999238	15273	1	6.2481	0.010377	0.034559	0.926003	655	3	6.2481
C21orf33	4	0.57569	0.71962	0.999238	12803	2	1.5133	0.010433	0.034754	0.926003	656	2	1.5133
ALOX15	4	0.98952	0.98954	0.999998	17850	0	4.9861	0.010484	0.034911	0.926003	658	4	4.9861
PRRT2	3	0.62891	0.68286	0.999238	13503	1	4.7275	0.013234	0.034912	0.926003	804	2	4.7275
CCNB1	4	0.98951	0.98953	0.999998	17849	0	4.6556	0.010486	0.034914	0.926003	659	4	4.6556
ZWILCH	4	0.041872	0.12356	0.968087	2235	3	-2.5087	0.01049	0.034927	0.926003	660	1	-2.5087
MDM1	4	0.97466	0.97489	0.999998	17563	0	5.9339	0.010497	0.034943	0.926003	661	4	5.9339
LAMC3	4	0.13913	0.28828	0.996369	5092	1	6.2886	0.010504	0.034969	0.926003	662	3	6.2886
GNPTAB	4	0.23716	0.4337	0.999238	7674	1	6.8557	0.010544	0.035101	0.926003	663	3	6.8557
BRICD5	4	0.98945	0.98948	0.999998	17848	0	5.7463	0.010548	0.035112	0.926003	664	4	5.7463
BCAT1	4	0.96382	0.96396	0.999998	17380	0	5.8867	0.010562	0.035155	0.926003	665	4	5.8867
OLFML2B	4	0.49725	0.65297	0.999238	11597	1	5.4931	0.010578	0.035206	0.926003	666	3	5.4931
OAT	4	0.98942	0.98945	0.999998	17847	0	5.2746	0.010582	0.035219	0.926003	667	4	5.2746
C16orf92	4	0.030806	0.094002	0.960774	1724	3	-2.5223	0.010603	0.035276	0.926003	668	1	-2.5223
DVL2	4	0.22384	0.41497	0.999238	7370	1	6.7646	0.010647	0.035416	0.926003	669	3	6.7646
SLC39A5	4	0.98932	0.98936	0.999998	17846	0	4.256	0.010678	0.035504	0.926003	670	4	4.256
RBM41	4	0.88384	0.88664	0.999238	15977	1	6.3185	0.01068	0.035508	0.926003	671	3	6.3185
ZBTB3	4	0.88938	0.89123	0.999238	16058	1	5.8295	0.010693	0.035546	0.926003	672	3	5.8295
CREBL2	4	0.9893	0.98934	0.999998	17845	0	4.3466	0.010695	0.035552	0.926003	673	4	4.3466
NCBP1	4	0.98929	0.98933	0.999998	17844	0	5.4427	0.010707	0.035585	0.926003	674	4	5.4427
NRP1	4	0.13158	0.2763	0.996369	4890	2	2.645	0.010707	0.035586	0.926003	675	2	2.645
DOCK10	4	0.94635	0.94652	0.999998	17077	0	6.1872	0.010714	0.035603	0.926003	676	3	6.1872
PANX2	4	0.43493	0.60066	0.999238	10641	2	1.1789	0.010716	0.035612	0.926003	677	2	1.1789
SIK1	4	0.6986	0.78409	0.999238	14009	1	6.4322	0.010748	0.03572	0.926003	678	3	6.4322
ADAL	4	0.039196	0.11651	0.966908	2099	2	1.4704	0.010773	0.035794	0.926003	679	2	1.4704
ZNF195	4	0.89132	0.89291	0.999238	16092	1	6.0799	0.010775	0.035801	0.926003	680	3	6.0799
ADPRM	4	0.98922	0.98926	0.999998	17843	0	4.3904	0.010781	0.035828	0.926003	681	4	4.3904
ELMOD1	4	0.98922	0.98926	0.999998	17842	0	5.2216	0.010785	0.035836	0.926003	682	4	5.2216
AARS	4	0.32584	0.51115	0.999238	9050	1	4.7241	0.010803	0.035899	0.926003	683	3	4.7241
FAM50A	4	0.98919	0.98924	0.999998	17841	0	5.7437	0.010806	0.035908	0.926003	684	4	5.7437
KIAA1549L	4	0.797	0.82965	0.999238	14888	1	6.0732	0.010808	0.035916	0.926003	685	3	6.0732
FARSB	4	0.98497	0.98503	0.999998	17762	0	5.6507	0.01083	0.035976	0.926003	686	4	5.6507
PPP2R5E	4	0.98915	0.9892	0.999998	17839	0	5.8428	0.010852	0.03604	0.926003	687	4	5.8428
PRR13	4	0.98914	0.98919	0.999998	17838	0	5.6176	0.010859	0.036065	0.926003	688	4	5.6176
PGPEP1	4	0.3325	0.51654	0.999238	9147	2	0.97269	0.010886	0.036158	0.926069	689	2	0.97269
FNIP2	4	0.7826	0.82203	0.999238	14733	1	6.4408	0.01091	0.036225	0.926069	691	3	6.4408
SLC44A2	4	0.64529	0.76405	0.999238	13589	1	6.3984	0.010919	0.036261	0.926069	692	3	6.3984
FAM90A26	2	0.98034	0.98043	0.999998	17672	0	6.0146	0.019659	0.036312	0.926069	1169	2	6.0146
MAP1LC3C	4	0.41945	0.58791	0.999238	10416	2	1.682	0.010943	0.036325	0.926069	693	2	1.682
TMEM98	4	0.58699	0.7294	0.999238	12958	1	3.2611	0.010999	0.036501	0.926069	694	3	3.2611
TMEM55A	4	0.85035	0.86171	0.999238	15504	1	6.5653	0.011028	0.0366	0.926069	695	3	6.5653
PDCD1LG2	4	0.98896	0.98901	0.999998	17836	0	5.5212	0.011039	0.036636	0.926069	696	4	5.5212
SERPINB10	4	0.45861	0.62042	0.999238	11014	1	2.344	0.011056	0.036686	0.926069	697	2	2.344
ACSL5	4	0.98893	0.98898	0.999998	17835	0	5.0083	0.01107	0.036721	0.926069	698	4	5.0083
SLC25A42	4	0.23125	0.42541	0.999238	7521	2	2.8263	0.011085	0.036774	0.926069	699	2	2.8263
CANX	3	0.8469	0.84682	0.999238	15460	0	7.1536	0.013976	0.036782	0.926069	842	2	7.1536
ZNF222	3	0.93253	0.93267	0.999238	16831	0	7.0631	0.013982	0.036791	0.926069	843	3	7.0631
HP	4	0.75266	0.80745	0.999238	14458	1	6.6048	0.011099	0.036822	0.926069	700	3	6.6048
CCAR1	4	0.93436	0.93456	0.999238	16866	0	4.8237	0.011113	0.036865	0.926069	701	3	4.8237
LACTBL1	4	0.16615	0.33021	0.996369	5849	2	3.2931	0.011154	0.037	0.926069	702	2	3.2931
BHMT2	4	0.49877	0.65428	0.999238	11620	1	6.3649	0.011162	0.03702	0.926069	703	3	6.3649
GLS2	4	0.20045	0.38121	0.996369	6773	2	-0.14092	0.011169	0.037041	0.926069	704	2	-0.14092
TCEB2	4	0.97021	0.97035	0.999998	17496	0	6.6683	0.011187	0.037098	0.926069	705	4	6.6683
IGSF11	4	0.74325	0.80305	0.999238	14378	1	6.2347	0.011193	0.037121	0.926069	706	3	6.2347
UIMC1	4	0.98878	0.98884	0.999998	17834	0	4.7992	0.011215	0.037185	0.926069	707	4	4.7992
DLEC1	4	0.028097	0.086461	0.954949	1597	2	0.54517	0.011226	0.037223	0.926069	708	2	0.54517
ERO1L	4	0.93118	0.93145	0.999238	16806	0	3.9629	0.011252	0.037312	0.926069	709	2	3.9629
ATXN2L	4	0.98872	0.98878	0.999998	17833	0	4.8079	0.011276	0.037386	0.926069	710	4	4.8079
DNAJC25	4	0.98872	0.98878	0.999998	17832	0	6.2732	0.01128	0.037399	0.926069	711	4	6.2732
NARG2	4	0.43239	0.59863	0.999238	10605	2	-2.6526	0.011283	0.037402	0.926069	712	1	-2.6526
OPRL1	4	0.24998	0.44955	0.999238	7955	1	3.8754	0.011339	0.037584	0.929303	713	3	3.8754
HPS6	4	0.14102	0.29127	0.996369	5152	2	0.24315	0.011424	0.037858	0.934682	715	2	0.24315
PHOX2A	4	0.98855	0.98861	0.999998	17829	0	5.1353	0.011449	0.03794	0.934682	716	4	5.1353
AMIGO2	4	0.98854	0.9886	0.999998	17828	0	5.454	0.011463	0.037977	0.934682	717	4	5.454
PDE11A	4	0.94952	0.94969	0.999998	17137	0	4.4208	0.011497	0.038073	0.934682	719	4	4.4208
NADK2	4	0.9885	0.98857	0.999998	17826	0	5.3488	0.011499	0.038077	0.934682	720	4	5.3488
DNASE1L2	4	0.98849	0.98856	0.999998	17825	0	5.2157	0.011511	0.038112	0.934682	721	4	5.2157
DYNC2LI1	4	0.92321	0.92354	0.999238	16653	0	3.8423	0.011565	0.038287	0.937287	722	3	3.8423
NPAP1	4	0.98842	0.98849	0.999998	17824	0	4.194	0.011577	0.038322	0.937287	723	4	4.194
KIF26B	4	0.98838	0.98845	0.999998	17823	0	4.1572	0.011616	0.038444	0.938166	724	4	4.1572
KLK6	4	0.64654	0.76451	0.999238	13597	1	2.5233	0.011622	0.038462	0.938166	725	2	2.5233
CPLX3	4	0.50749	0.66163	0.999238	11768	2	2.4208	0.011679	0.038635	0.940988	726	2	2.4208
TNFSF13	4	0.98831	0.98838	0.999998	17822	0	4.4711	0.011693	0.038682	0.940988	727	4	4.4711
C1orf68	4	0.2577	0.45589	0.999238	8078	1	5.6833	0.011735	0.038819	0.943053	728	3	5.6833
RPAP3	4	0.87131	0.87676	0.999238	15786	1	5.9195	0.011776	0.038952	0.945006	729	3	5.9195
CALD1	4	0.9882	0.98826	0.999998	17821	0	5.4628	0.011801	0.039016	0.945292	730	4	5.4628
CTSF	4	0.085022	0.2002	0.995321	3583	1	5.0008	0.011823	0.039099	0.945955	731	3	5.0008
ANAPC10	4	0.4157	0.58481	0.999238	10357	2	2.7232	0.011838	0.039148	0.945955	732	2	2.7232
ATG4C	4	0.37578	0.55185	0.999238	9789	1	5.8662	0.011933	0.03943	0.948382	733	3	5.8662
MYOM2	4	0.18995	0.36581	0.996369	6501	2	1.8203	0.011933	0.039431	0.948382	734	2	1.8203
TAAR1	4	0.98805	0.98812	0.999998	17819	0	4.5133	0.011951	0.039486	0.948382	735	4	4.5133
MAP1A	4	0.98802	0.9881	0.999998	17818	0	5.2012	0.01198	0.039577	0.948382	736	4	5.2012
SPATA17	4	0.66794	0.77225	0.999238	13759	1	5.9313	0.012017	0.039701	0.948382	737	3	5.9313
TDRD1	4	0.46636	0.62688	0.999238	11131	2	-0.92945	0.012075	0.039864	0.948382	738	1	-0.92945
ZNF684	4	0.28474	0.47774	0.999238	8461	2	2.8794	0.012103	0.039964	0.948382	739	2	2.8794
ITM2B	4	0.98788	0.98796	0.999998	17817	0	4.7094	0.012123	0.040019	0.948382	740	4	4.7094
FAM19A5	4	0.4305	0.59705	0.999238	10576	1	4.2809	0.012131	0.040043	0.948382	742	3	4.2809
KATNB1	3	0.41679	0.56928	0.999238	10373	1	6.8328	0.015302	0.040048	0.948382	913	2	6.8328
CELSR3	4	0.98786	0.98794	0.999998	17816	0	5.6261	0.012135	0.040056	0.948382	743	4	5.6261
HOXD13	4	0.97826	0.97851	0.999998	17636	0	5.7868	0.012147	0.040089	0.948382	744	4	5.7868
ZNF296	4	0.98784	0.98791	0.999998	17815	0	6.2733	0.012162	0.040145	0.948382	746	4	6.2733
GPR87	4	0.98781	0.98788	0.999998	17814	0	6.0833	0.012185	0.04022	0.948382	747	4	6.0833
RAET1G	4	0.9878	0.98787	0.999998	17813	0	5.1606	0.012202	0.040273	0.948382	748	4	5.1606
PHKA1	4	0.17851	0.34881	0.996369	6178	1	2.6249	0.012216	0.040312	0.948382	749	3	2.6249
C11orf71	4	0.97084	0.97101	0.999998	17502	0	6.1061	0.012226	0.040344	0.948382	750	4	6.1061
TXK	4	0.41198	0.58182	0.999238	10307	2	3.1073	0.012234	0.04037	0.948382	751	2	3.1073
ANKRD34C	3	0.75964	0.76962	0.999238	14515	1	6.9639	0.015511	0.040565	0.948382	932	2	6.9639
TOMM20L	4	0.90254	0.90302	0.999238	16282	1	1.8049	0.012301	0.040587	0.948382	752	2	1.8049
NTN3	4	0.98767	0.98773	0.999998	17812	0	4.9898	0.012331	0.040688	0.948382	753	4	4.9898
EGFL6	4	0.98765	0.98771	0.999998	17811	0	5.2528	0.01235	0.040743	0.948382	754	4	5.2528
RET	4	0.23312	0.42804	0.999238	7573	2	2.0037	0.012357	0.040765	0.948382	755	2	2.0037
ZNF566	4	0.98761	0.98767	0.999998	17810	0	5.5147	0.012388	0.040851	0.948382	756	4	5.5147
TMEM251	4	0.73809	0.80069	0.999238	14342	1	6.1028	0.012414	0.040941	0.948382	757	3	6.1028
EVA1C	3	0.98434	0.98449	0.999998	17749	0	5.4158	0.015664	0.040941	0.948382	940	3	5.4158
HIST1H4F	4	0.98758	0.98763	0.999998	17808	0	5.3011	0.012422	0.040961	0.948382	758	4	5.3011
RGMB	3	0.98428	0.98443	0.999998	17747	0	5.1675	0.01572	0.041085	0.948382	942	3	5.1675
PPP2R1A	4	0.98754	0.9876	0.999998	17807	0	4.712	0.012464	0.041096	0.948382	759	4	4.712
PTPRF	4	0.24822	0.44813	0.999238	7930	2	1.7069	0.012471	0.041116	0.948382	760	2	1.7069
MAST2	4	0.57844	0.72204	0.999238	12848	1	3.6099	0.012527	0.041284	0.948382	761	3	3.6099
KRBA2	4	0.98747	0.98754	0.999998	17806	0	4.7105	0.012528	0.041286	0.948382	762	4	4.7105
CLDN23	4	0.22815	0.42101	0.999238	7452	1	5.8324	0.012555	0.041358	0.948382	763	3	5.8324
UQCC1	4	0.94264	0.94282	0.999998	17010	0	6.1081	0.012562	0.04138	0.948382	764	3	6.1081
FRMD8	4	0.6759	0.77526	0.999238	13818	1	6.2615	0.012587	0.041462	0.948382	765	3	6.2615
SULT1B1	4	0.9554	0.95554	0.999998	17230	0	5.7156	0.012601	0.041506	0.948382	766	4	5.7156
USP25	4	0.98739	0.98744	0.999998	17803	0	4.1919	0.012615	0.041558	0.948382	769	4	4.1919
RBL2	4	0.98739	0.98744	0.999998	17804	0	4.803	0.012615	0.041558	0.948382	767	4	4.803
TMEM261	4	0.98739	0.98744	0.999998	17805	0	5.5013	0.012615	0.041558	0.948382	768	4	5.5013
SUOX	4	0.95448	0.95461	0.999998	17208	0	4.8651	0.01264	0.041621	0.948382	770	4	4.8651
APAF1	4	0.98731	0.98735	0.999998	17802	0	5.4328	0.012689	0.041773	0.948382	771	4	5.4328
MROH7	4	0.79742	0.82988	0.999238	14892	1	5.4932	0.012697	0.041792	0.948382	772	3	5.4932
FAF2	4	0.51183	0.66528	0.999238	11843	1	6.4193	0.012706	0.041817	0.948382	773	3	6.4193
COBL	4	0.98728	0.98731	0.999998	17801	0	4.7547	0.012722	0.041864	0.948382	774	4	4.7547
BTG2	4	0.88576	0.88821	0.999238	16004	1	5.1795	0.012723	0.041866	0.948382	775	3	5.1795
CEP95	3	0.44469	0.5902	0.999238	10797	1	6.8653	0.016054	0.041892	0.948382	963	2	6.8653
GNAO1	4	0.98725	0.98729	0.999998	17800	0	4.7233	0.012752	0.041948	0.948382	776	4	4.7233
TMEM106B	4	0.82891	0.84798	0.999238	15238	1	2.049	0.012753	0.041952	0.948382	777	2	2.049
NAGS	4	0.33868	0.52162	0.999238	9241	1	1.3098	0.01281	0.04214	0.948382	778	3	1.3098
ZBTB39	4	0.16416	0.32717	0.996369	5798	1	6.5621	0.012835	0.042208	0.948382	779	3	6.5621
SERINC4	4	0.87747	0.88152	0.999238	15881	1	6.0291	0.012849	0.042248	0.948382	780	3	6.0291
FAM3D	4	0.18024	0.35141	0.996369	6225	2	2.685	0.01285	0.042251	0.948382	781	2	2.685
TMPRSS6	4	0.53104	0.68161	0.999238	12124	1	4.7705	0.012866	0.042299	0.948382	782	3	4.7705
PARP12	4	0.98711	0.98715	0.999998	17799	0	5.2044	0.012889	0.042383	0.948382	783	4	5.2044
CCDC163P	4	0.75081	0.80656	0.999238	14448	1	4.0815	0.012909	0.042447	0.948382	784	2	4.0815
SS18	4	0.98708	0.98712	0.999998	17798	0	5.3535	0.012922	0.042484	0.948382	785	4	5.3535
OR8U1	4	0.8469	0.85937	0.999238	15462	1	6.2783	0.012986	0.042686	0.948382	786	3	6.2783
MMP2	4	0.98697	0.987	0.999998	17796	0	4.7466	0.013029	0.042818	0.948382	788	4	4.7466
DNAJB9	4	0.048657	0.13616	0.980452	2440	3	-1.8989	0.013036	0.042838	0.948382	789	1	-1.8989
BIRC3	4	0.94839	0.94857	0.999998	17111	0	6.3972	0.013042	0.042851	0.948382	790	3	6.3972
ADPRHL2	4	0.98695	0.98699	0.999998	17795	0	4.3376	0.013049	0.042871	0.948382	791	4	4.3376
SPTAN1	4	0.98695	0.98698	0.999998	17794	0	6.3964	0.013051	0.042881	0.948382	792	4	6.3964
TSPAN18	4	0.71149	0.78927	0.999238	14116	1	6.3814	0.013054	0.04289	0.948382	793	3	6.3814
ENOX2	4	0.80236	0.83255	0.999238	14946	1	6.0419	0.013059	0.042906	0.948382	794	3	6.0419
CYTH3	4	0.98694	0.98697	0.999998	17793	0	5.1363	0.013062	0.042915	0.948382	795	4	5.1363
PCSK2	4	0.97596	0.97624	0.999998	17589	0	5.9673	0.013081	0.042969	0.948382	796	4	5.9673
ANKRD23	4	0.98691	0.98695	0.999998	17792	0	4.3916	0.013087	0.042989	0.948382	797	4	4.3916
SLC30A6	4	0.58508	0.72776	0.999238	12936	1	3.3016	0.013092	0.043007	0.948382	798	3	3.3016
PRKRIR	3	0.52997	0.63022	0.999238	12110	1	6.9234	0.016551	0.04316	0.948382	985	2	6.9234
CSTF2T	4	0.023507	0.073621	0.935156	1383	1	6.117	0.013156	0.043191	0.948382	799	3	6.117
LYSMD4	4	0.98683	0.98684	0.999998	17791	0	4.24	0.013173	0.043237	0.948382	800	4	4.24
ATF7IP2	4	0.94901	0.94917	0.999998	17126	0	6.2405	0.013184	0.043277	0.948382	801	3	6.2405
ZNF74	4	0.9868	0.98682	0.999998	17790	0	5.3866	0.013204	0.043336	0.948382	802	4	5.3866
HDAC4	4	0.050803	0.14007	0.981083	2515	1	5.3408	0.013205	0.043344	0.948382	803	3	5.3408
B3GNT4	3	0.5778	0.65457	0.999238	12830	1	6.8537	0.016641	0.043362	0.948382	988	2	6.8537
BIN3	4	0.59642	0.73744	0.999238	13111	1	4.3248	0.013254	0.043498	0.948382	805	3	4.3248
PHLDB1	4	0.68221	0.7777	0.999238	13871	1	6.1292	0.013257	0.04351	0.948382	806	3	6.1292
PKM	4	0.84287	0.8567	0.999238	15406	1	6.5346	0.013262	0.043529	0.948382	807	3	6.5346
LAMC2	4	0.18489	0.35831	0.996369	6360	1	5.871	0.013291	0.043618	0.948382	808	3	5.871
RMI2	4	0.54399	0.69264	0.999238	12323	1	5.9164	0.013292	0.043622	0.948382	809	3	5.9164
FOXRED2	4	0.7987	0.83059	0.999238	14908	1	2.7897	0.013318	0.043701	0.948382	810	3	2.7897
ACKR3	4	0.26132	0.45885	0.999238	8132	1	6.0205	0.01332	0.043705	0.948382	811	3	6.0205
MIOX	4	0.93732	0.93751	0.999238	16906	0	5.9341	0.013355	0.043809	0.948382	812	3	5.9341
TBC1D22B	3	0.18626	0.31613	0.996369	6398	2	-1.7966	0.016836	0.043826	0.948382	1000	1	-1.7966
ACTRT1	4	0.51091	0.66447	0.999238	11833	1	4.2446	0.013375	0.043865	0.948382	813	3	4.2446
PSMF1	4	0.98658	0.9866	0.999998	17789	0	4.9849	0.013417	0.043991	0.948382	814	4	4.9849
NPC1	4	0.074565	0.18204	0.995321	3227	1	6.0945	0.013427	0.044021	0.948382	815	3	6.0945
DLG1	4	0.98327	0.98338	0.999998	17731	0	5.06	0.013429	0.044026	0.948382	816	4	5.06
SDCBP2	4	0.4963	0.65219	0.999238	11581	2	2.0832	0.013431	0.044035	0.948382	817	2	2.0832
PCMTD1	4	0.94653	0.94669	0.999998	17079	0	6.0071	0.013432	0.044037	0.948382	818	3	6.0071
FAM219B	4	0.52347	0.67525	0.999238	12016	1	6.4128	0.01345	0.044093	0.948382	819	3	6.4128
LYPD6	4	0.98655	0.98657	0.999998	17788	0	3.6973	0.013455	0.044106	0.948382	820	4	3.6973
ADO	4	0.78995	0.82589	0.999238	14803	1	4.5816	0.013465	0.044138	0.948382	821	3	4.5816
FOXL1	4	0.29126	0.4831	0.999238	8545	2	2.8934	0.01348	0.044188	0.948382	822	2	2.8934
ACAD11	4	0.37808	0.55367	0.999238	9827	1	5.0254	0.013544	0.044403	0.951403	823	3	5.0254
SPINK6	4	0.98643	0.98646	0.999998	17787	0	4.5179	0.013575	0.044505	0.951403	824	4	4.5179
HPSE2	4	0.96108	0.96118	0.999998	17324	0	5.0683	0.013601	0.044592	0.951403	825	4	5.0683
DPYD	4	0.11836	0.25509	0.996369	4504	1	6.0055	0.013633	0.044681	0.951403	826	3	6.0055
EARS2	4	0.42071	0.58896	0.999238	10438	1	2.6129	0.013686	0.044844	0.951403	827	3	2.6129
TMEM81	4	0.89003	0.89178	0.999238	16067	1	6.0983	0.013686	0.044844	0.951403	828	3	6.0983
SV2B	4	0.98631	0.98635	0.999998	17786	0	6.6676	0.013691	0.044862	0.951403	829	4	6.6676
MLNR	4	0.90501	0.90533	0.999238	16312	1	5.8388	0.013709	0.044923	0.951403	830	3	5.8388
ECHDC3	4	0.53676	0.68645	0.999238	12208	1	5.9371	0.01374	0.045009	0.951403	831	3	5.9371
AK7	4	0.82154	0.8435	0.999238	15146	1	5.7614	0.013759	0.045063	0.951403	832	3	5.7614
IL16	4	0.56503	0.71057	0.999238	12629	1	4.1542	0.013763	0.045077	0.951403	833	3	4.1542
MGAT4C	4	0.75418	0.80814	0.999238	14476	1	6.0831	0.013766	0.045087	0.951403	834	3	6.0831
UPK1A	4	0.92076	0.92103	0.999238	16602	0	2.3002	0.01377	0.045095	0.951403	835	2	2.3002
TIMM23	4	0.53685	0.68652	0.999238	12211	2	2.8	0.013809	0.045223	0.951403	836	2	2.8
PHPT1	4	0.0068303	0.02329	0.878478	466	2	1.116	0.013827	0.045277	0.951403	837	2	1.116
HIF3A	4	0.89799	0.89877	0.999238	16205	1	6.2736	0.013895	0.045497	0.951403	838	3	6.2736
LTBP3	4	0.98608	0.98615	0.999998	17784	0	5.4725	0.013921	0.045578	0.951403	839	4	5.4725
DNAL1	4	0.96314	0.96326	0.999998	17365	0	4.1814	0.01394	0.045635	0.951403	840	4	4.1814
ASIC3	4	0.82919	0.84814	0.999238	15243	1	6.1136	0.013953	0.045678	0.951403	841	3	6.1136
NKX2-5	4	0.54238	0.69127	0.999238	12300	2	-0.67823	0.013996	0.045825	0.951403	844	1	-0.67823
RPA2	4	0.38572	0.55995	0.999238	9944	1	0.6869	0.014053	0.045992	0.951403	846	2	0.6869
IFT27	4	0.57898	0.72251	0.999238	12857	1	6.3178	0.014083	0.046087	0.951403	847	3	6.3178
CCND2	4	0.47152	0.63124	0.999238	11199	2	2.5904	0.014109	0.046174	0.951403	848	2	2.5904
NUAK2	4	0.98589	0.98594	0.999998	17782	0	4.372	0.014114	0.046186	0.951403	849	4	4.372
ADAM33	4	0.98586	0.98591	0.999998	17781	0	5.719	0.014139	0.046269	0.951403	850	4	5.719
GSTA5	3	0.41043	0.56255	0.999238	10284	1	6.8174	0.017809	0.046279	0.951403	1058	2	6.8174
SUFU	3	0.030256	0.075911	0.935392	1694	2	-0.59145	0.017809	0.04628	0.951403	1059	1	-0.59145
CHD1	4	0.96757	0.9677	0.999998	17444	0	5.9859	0.014148	0.046299	0.951403	851	4	5.9859
TRIM14	4	0.90655	0.90681	0.999238	16343	1	6.0296	0.014156	0.046318	0.951403	852	3	6.0296
TSACC	3	0.73206	0.74901	0.999238	14280	1	6.8766	0.017846	0.046376	0.951403	1063	2	6.8766
ABCD4	4	0.98582	0.98586	0.999998	17780	0	4.561	0.014184	0.046407	0.951403	853	4	4.561
CHTOP	4	0.51857	0.67102	0.999238	11955	2	3.1979	0.014187	0.046413	0.951403	854	2	3.1979
NUDT16L1	4	0.0030954	0.010877	0.838154	223	2	-3.4445	0.014194	0.04644	0.951403	855	2	-3.4445
C1QTNF4	4	0.17483	0.34331	0.996369	6075	3	-1.3152	0.014194	0.04644	0.951403	856	1	-1.3152
KIAA0895L	4	0.1925	0.36956	0.996369	6580	1	5.4264	0.014249	0.046613	0.951403	857	3	5.4264
SLC22A24	4	0.11568	0.25078	0.996369	4446	3	-1.534	0.014279	0.046695	0.951403	858	1	-1.534
KANSL1	4	0.98569	0.98574	0.999998	17779	0	5.6617	0.014309	0.046791	0.951403	859	4	5.6617
TMEM55B	4	0.29443	0.48561	0.999238	8583	2	2.8933	0.014319	0.04682	0.951403	860	2	2.8933
NREP	3	0.78715	0.79156	0.999238	14775	1	7.0127	0.018072	0.046899	0.951403	1076	2	7.0127
SFPQ	4	0.47859	0.63725	0.999238	11302	2	1.8328	0.014392	0.047058	0.951403	861	2	1.8328
FAM214B	3	0.095355	0.21054	0.996369	3865	2	-2.3351	0.018148	0.047068	0.951403	1081	1	-2.3351
EPAS1	4	0.89936	0.90002	0.999238	16239	1	5.8316	0.014401	0.047094	0.951403	862	3	5.8316
MRAP	4	0.98558	0.98564	0.999998	17778	0	4.4253	0.014418	0.047145	0.951403	863	4	4.4253
HLA-DPB1	4	0.59159	0.73334	0.999238	13037	2	1.8124	0.014448	0.047245	0.951403	864	2	1.8124
CCL26	4	0.2575	0.45571	0.999238	8074	1	5.8195	0.014456	0.047268	0.951403	865	3	5.8195
SSR3	4	0.060918	0.15808	0.995321	2815	1	5.922	0.014474	0.047331	0.951403	866	3	5.922
COL11A1	4	0.11568	0.25078	0.996369	4447	1	6.1181	0.014478	0.047342	0.951403	867	3	6.1181
TLDC1	4	0.98551	0.98557	0.999998	17777	0	4.715	0.014494	0.04739	0.951403	868	4	4.715
SAMSN1	4	0.77311	0.81722	0.999238	14643	1	5.9043	0.014508	0.04743	0.951403	869	3	5.9043
CXCL1	3	0.89297	0.89291	0.999238	16123	0	6.8315	0.018305	0.047443	0.951403	1089	2	6.8315
FZD6	4	0.15484	0.31279	0.996369	5537	2	2.9399	0.014531	0.047495	0.951403	870	2	2.9399
C2CD3	3	0.98166	0.98181	0.999998	17695	0	6.2033	0.018335	0.047512	0.951403	1091	3	6.2033
GFRA2	4	0.98546	0.98551	0.999998	17776	0	5.4191	0.014544	0.047543	0.951403	871	4	5.4191
ABCA2	4	0.98544	0.9855	0.999998	17775	0	5.4451	0.014558	0.04758	0.951403	872	4	5.4451
GAMT	4	0.98397	0.98405	0.999998	17739	0	4.722	0.014561	0.047586	0.951403	873	4	4.722
DTNBP1	4	0.63007	0.75877	0.999238	13511	1	6.1688	0.014597	0.047684	0.951403	874	3	6.1688
MED9	4	0.9854	0.98545	0.999998	17774	0	4.919	0.014604	0.047701	0.951403	875	4	4.919
SOX2	4	0.5967	0.73767	0.999238	13116	1	3.9004	0.014618	0.047738	0.951403	876	3	3.9004
POLR2K	3	0.98153	0.98169	0.999998	17692	0	5.1927	0.018467	0.047829	0.951403	1100	3	5.1927
SLC39A8	4	0.98534	0.9854	0.999998	17773	0	4.1382	0.014659	0.047875	0.951403	877	4	4.1382
RPE65	4	0.98533	0.98539	0.999998	17772	0	5.3233	0.014671	0.047917	0.951403	878	4	5.3233
RUFY3	4	0.48616	0.64357	0.999238	11411	2	0.92494	0.014674	0.047925	0.951403	879	2	0.92494
TMEM127	4	0.98531	0.98538	0.999998	17771	0	4.9478	0.014688	0.047971	0.951403	880	4	4.9478
HSDL1	4	0.61923	0.75508	0.999238	13440	1	6.1696	0.014697	0.047995	0.951403	881	3	6.1696
EPB41	4	0.30807	0.49671	0.999238	8776	2	-1.0274	0.01473	0.048099	0.951403	882	1	-1.0274
VSTM5	4	0.98525	0.98532	0.999998	17770	0	4.7223	0.014748	0.048157	0.951403	883	4	4.7223
PPP3CB	4	0.98523	0.98531	0.999998	17769	0	5.1826	0.014765	0.048208	0.951403	884	4	5.1826
CRLF3	4	0.56876	0.71373	0.999238	12693	1	5.7481	0.014779	0.048249	0.951403	885	3	5.7481
PTPRH	4	0.59883	0.7395	0.999238	13156	2	3.0356	0.014783	0.048261	0.951403	886	2	3.0356
BTF3L4	4	0.98521	0.98528	0.999998	17768	0	5.5369	0.014792	0.048288	0.951403	887	4	5.5369
NABP1	4	0.98519	0.98526	0.999998	17767	0	4.7582	0.014811	0.048363	0.951403	888	4	4.7582
SUPT5H	4	0.098009	0.22192	0.996369	3940	1	5.7204	0.014815	0.048376	0.951403	889	3	5.7204
SLC25A25	4	0.47017	0.63012	0.999238	11185	1	6.5857	0.014828	0.048417	0.951403	890	3	6.5857
NRN1	4	0.98512	0.98518	0.999998	17766	0	4.6446	0.014883	0.048604	0.951403	891	4	4.6446
FNBP4	4	0.40872	0.57902	0.999238	10261	2	2.7273	0.0149	0.048668	0.951403	892	2	2.7273
C8orf47	4	0.87925	0.88295	0.999238	15910	1	5.7182	0.014922	0.048737	0.951403	893	3	5.7182
SUGT1	4	0.98508	0.98513	0.999998	17764	0	4.3175	0.014923	0.048742	0.951403	895	4	4.3175
CRH	4	0.98508	0.98513	0.999998	17765	0	5.0076	0.014923	0.048742	0.951403	894	4	5.0076
CERK	4	0.85399	0.86417	0.999238	15552	1	4.2	0.014956	0.048838	0.951403	896	3	4.2
STK32A	4	0.98504	0.9851	0.999998	17763	0	3.8083	0.01496	0.048852	0.951403	897	4	3.8083
ASH1L	4	0.95373	0.95387	0.999998	17196	0	6.3353	0.014982	0.048925	0.951403	898	4	6.3353
MYL7	4	0.61766	0.75454	0.999238	13429	1	5.3388	0.015006	0.049008	0.951403	899	3	5.3388
HAO2	4	0.88616	0.88855	0.999238	16014	1	1.1669	0.015013	0.049032	0.951403	900	2	1.1669
C1QTNF3	4	0.56407	0.70978	0.999238	12610	2	2.6285	0.015038	0.049108	0.951403	901	2	2.6285
NAALADL1	4	0.98494	0.98501	0.999998	17761	0	4.5357	0.015055	0.049161	0.951403	902	4	4.5357
ZNF621	4	0.97612	0.97639	0.999998	17593	0	6.0319	0.015058	0.049167	0.951403	903	4	6.0319
POLE2	4	0.32399	0.50963	0.999238	9021	2	0.21157	0.015069	0.04921	0.951403	904	2	0.21157
OR7A5	4	0.98224	0.98234	0.999998	17710	0	6.2575	0.015107	0.049315	0.951403	905	4	6.2575
CPT1B	4	0.98487	0.98494	0.999998	17759	0	5.5926	0.015131	0.049394	0.951403	906	4	5.5926
SGSM1	4	0.91215	0.91229	0.999238	16458	0	6.586	0.01516	0.049467	0.951403	907	3	6.586
AHCYL1	4	0.98482	0.98489	0.999998	17758	0	4.9436	0.015181	0.049523	0.951403	908	4	4.9436
THUMPD3	4	0.29016	0.48221	0.999238	8527	2	-0.39173	0.015182	0.049526	0.951403	911	2	-0.39173
MTCH2	4	0.75041	0.80636	0.999238	14445	1	4.0479	0.015182	0.049526	0.951403	909	3	4.0479
GIPC1	4	0.96959	0.96972	0.999998	17476	0	4.5597	0.015182	0.049526	0.951403	910	4	4.5597
ARMCX6	4	0.12924	0.2726	0.996369	4811	1	4.165	0.015295	0.049852	0.951403	912	3	4.165
BEND7	4	0.98468	0.98474	0.999998	17757	0	4.9675	0.015324	0.049954	0.951403	914	4	4.9675
OR2H1	3	0.98065	0.98078	0.999998	17679	0	5.1391	0.019354	0.049975	0.951403	1147	3	5.1391
WDR49	4	0.0074283	0.0252	0.897712	492	1	5.4766	0.015334	0.049978	0.951403	915	3	5.4766
SLC38A8	4	0.98464	0.98471	0.999998	17756	0	5.2947	0.015357	0.050054	0.951403	916	4	5.2947
PTPLA	4	0.58478	0.72751	0.999238	12934	1	5.9374	0.015358	0.050057	0.951403	917	3	5.9374
MTUS1	4	0.36504	0.54308	0.999238	9638	2	3.2	0.015383	0.050126	0.951403	918	2	3.2
AGBL1	4	0.60667	0.74634	0.999238	13286	1	5.7129	0.015405	0.050192	0.951403	919	3	5.7129
MAPKAPK2	4	0.7516	0.80695	0.999238	14450	1	0.55589	0.015408	0.0502	0.951403	920	2	0.55589
RNASEK	4	0.38893	0.5626	0.999238	9985	2	2.8698	0.015415	0.050217	0.951403	921	2	2.8698
RNF38	4	0.98457	0.98465	0.999998	17755	0	4.8451	0.015426	0.050256	0.951403	922	4	4.8451
KPNA3	4	0.59782	0.73862	0.999238	13135	1	6.3577	0.015435	0.050284	0.951403	923	3	6.3577
BEST3	4	0.98456	0.98464	0.999998	17754	0	4.4616	0.015436	0.050287	0.951403	924	4	4.4616
FUT7	4	0.97306	0.9733	0.999998	17542	0	5.4698	0.015439	0.050298	0.951403	925	4	5.4698
CD300LB	4	0.30661	0.49554	0.999238	8753	1	5.1639	0.015447	0.050324	0.951403	926	3	5.1639
ARMC6	4	0.022215	0.069985	0.932381	1317	2	0.29225	0.015464	0.050371	0.951403	927	2	0.29225
SMPDL3B	4	0.88487	0.88747	0.999238	15984	1	6.3208	0.015466	0.050377	0.951403	928	3	6.3208
BEND5	4	0.34568	0.52729	0.999238	9334	1	6.1855	0.015485	0.050448	0.951403	929	3	6.1855
C3AR1	4	0.080379	0.19219	0.995321	3429	2	2.4371	0.015496	0.050477	0.951403	930	2	2.4371
IRGQ	4	0.082831	0.19644	0.995321	3509	1	6.2647	0.015508	0.050512	0.951403	931	3	6.2647
YEATS2	4	0.67272	0.77405	0.999238	13795	1	4.234	0.01552	0.050546	0.951403	933	3	4.234
OR5D13	4	0.98447	0.98454	0.999998	17753	0	5.1532	0.015534	0.050595	0.951403	934	4	5.1532
PYGB	4	0.98444	0.98452	0.999998	17752	0	4.965	0.015557	0.050663	0.951403	935	4	4.965
COL6A1	4	0.98444	0.98452	0.999998	17751	0	5.1896	0.015559	0.050675	0.951403	936	4	5.1896
MRPL36	4	0.012536	0.041312	0.911792	776	3	-2.7532	0.015577	0.050718	0.951403	937	1	-2.7532
DSN1	4	0.78433	0.82294	0.999238	14753	1	4.7028	0.015581	0.050729	0.951403	938	3	4.7028
TRIM32	4	0.53761	0.68714	0.999238	12225	2	3.3216	0.015642	0.05093	0.951403	939	2	3.3216
CABLES1	4	0.98432	0.9844	0.999998	17748	0	4.8336	0.015683	0.051065	0.951403	941	4	4.8336
ADAMTS19	4	0.96796	0.96811	0.999998	17451	0	6.2618	0.015772	0.051344	0.951403	943	4	6.2618
TCTE3	4	0.98422	0.9843	0.999998	17746	0	4.6597	0.015779	0.051368	0.951403	944	4	4.6597
IDO2	4	0.98422	0.98429	0.999998	17745	0	5.6568	0.015782	0.051377	0.951403	945	4	5.6568
ZBTB33	4	0.9842	0.98427	0.999998	17744	0	4.8415	0.015802	0.051437	0.951403	946	4	4.8415
SLC35D1	4	0.77816	0.81974	0.999238	14692	1	5.9541	0.015805	0.051442	0.951403	947	3	5.9541
LRRC32	4	0.98419	0.98427	0.999998	17743	0	5.4549	0.015807	0.051446	0.951403	948	4	5.4549
MICALL1	4	0.98008	0.98026	0.999998	17667	0	6.4959	0.015819	0.051474	0.951403	949	4	6.4959
IL36B	4	0.60816	0.7476	0.999238	13307	2	2.0149	0.015831	0.051518	0.951403	950	2	2.0149
PDK3	4	0.95614	0.95631	0.999998	17240	0	5.2109	0.015838	0.051542	0.951403	951	4	5.2109
SYNRG	4	0.40011	0.57189	0.999238	10145	1	4.1968	0.015862	0.051624	0.951403	952	3	4.1968
PLA2G15	3	0.97993	0.98005	0.999998	17664	0	4.9133	0.020069	0.051693	0.951403	1185	3	4.9133
RCVRN	4	0.080346	0.19214	0.995321	3428	2	2.3427	0.015886	0.051704	0.951403	953	2	2.3427
RPL36A	4	0.9841	0.98418	0.999998	17742	0	3.863	0.015899	0.051738	0.951403	954	4	3.863
MTMR14	4	0.057679	0.15238	0.987212	2730	2	0.50421	0.015915	0.051782	0.951403	955	2	0.50421
RARG	4	0.92779	0.9281	0.999238	16743	0	6.2066	0.015919	0.051792	0.951403	956	3	6.2066
TSPYL4	4	0.98407	0.98414	0.999998	17741	0	4.3639	0.015932	0.051838	0.951403	957	4	4.3639
PPP5D1	4	0.98405	0.98413	0.999998	17740	0	4.7447	0.015948	0.051887	0.951403	958	4	4.7447
PALM2	4	0.086837	0.2033	0.995964	3640	1	2.9396	0.015972	0.051975	0.951403	959	3	2.9396
CASC4	4	0.012046	0.039774	0.911792	745	1	5.9777	0.016011	0.052071	0.951403	960	3	5.9777
SLCO3A1	4	0.98214	0.98224	0.999998	17706	0	6.3599	0.016018	0.052096	0.951403	961	4	6.3599
TEX264	3	0.88373	0.88371	0.999238	15974	0	6.7217	0.020228	0.052123	0.951403	1202	2	6.7217
PRG4	4	0.16772	0.33256	0.996369	5891	2	0.13304	0.016028	0.052127	0.951403	962	2	0.13304
OSBPL5	4	0.1561	0.31478	0.996369	5570	2	1.8213	0.016084	0.052302	0.951403	964	2	1.8213
ZFP82	4	0.91618	0.91637	0.999238	16537	0	6.1941	0.016145	0.052462	0.951403	965	3	6.1941
SBK1	4	0.20293	0.38482	0.996369	6838	1	2.154	0.016149	0.052478	0.951403	966	2	2.154
TUBB1	4	0.51322	0.66645	0.999238	11872	2	3.2468	0.016174	0.052546	0.951403	967	2	3.2468
ATAD3B	4	0.19073	0.36698	0.996369	6524	2	0.14656	0.016197	0.05261	0.951403	968	2	0.14656
HDAC1	4	0.039084	0.11625	0.966908	2093	3	-2.5185	0.016254	0.052785	0.951403	969	1	-2.5185
NCKIPSD	4	0.61338	0.75213	0.999238	13380	2	3.5305	0.016273	0.052848	0.951403	970	2	3.5305
TPR	4	0.93421	0.9344	0.999238	16860	0	6.0834	0.016284	0.052881	0.951403	971	3	6.0834
CTSL	4	0.98362	0.9837	0.999998	17738	0	4.1329	0.016377	0.053158	0.951403	972	4	4.1329
PHKG2	4	0.48508	0.64266	0.999238	11387	1	5.5648	0.016406	0.053238	0.951403	973	3	5.5648
PLEKHM1	4	0.98358	0.98365	0.999998	17737	0	4.3026	0.016422	0.053281	0.951403	975	4	4.3026
TRAF3IP1	4	0.96597	0.9661	0.999998	17424	0	4.2418	0.016423	0.053284	0.951403	976	4	4.2418
KIAA1377	4	0.94905	0.94921	0.999998	17128	0	5.8332	0.016423	0.053286	0.951403	977	3	5.8332
MUC1	4	0.80566	0.83435	0.999238	14983	1	5.7778	0.016439	0.05333	0.951403	978	3	5.7778
GGA1	4	0.31632	0.50351	0.999238	8895	1	5.6822	0.016459	0.05339	0.951403	979	3	5.6822
ZFP91	4	0.73043	0.79735	0.999238	14266	1	5.5131	0.016459	0.05339	0.951403	980	3	5.5131
DPF3	4	0.95258	0.95274	0.999998	17180	0	5.2889	0.016479	0.053443	0.951403	982	4	5.2889
SMEK1	4	0.19136	0.36794	0.996369	6548	2	-0.88394	0.016536	0.053623	0.951403	983	1	-0.88394
KRTAP5-1	4	0.67216	0.77385	0.999238	13789	1	5.3718	0.016539	0.053636	0.951403	984	3	5.3718
CAPZA2	4	0.98342	0.9835	0.999998	17735	0	5.6492	0.016582	0.053757	0.951403	986	4	5.6492
CRISPLD1	4	0.98342	0.9835	0.999998	17734	0	4.3014	0.016584	0.053764	0.951403	987	4	4.3014
ISCU	3	0.97909	0.97925	0.999998	17648	0	5.4349	0.020909	0.053848	0.951403	1230	3	5.4349
L1CAM	4	0.98336	0.98345	0.999998	17733	0	4.7163	0.016643	0.053936	0.951403	989	4	4.7163
ADAMTS4	4	0.46614	0.62669	0.999238	11128	1	5.3148	0.016648	0.053949	0.951403	990	3	5.3148
CDH1	4	0.82386	0.84488	0.999238	15182	1	5.1022	0.016648	0.05395	0.951403	991	3	5.1022
GNG11	4	0.96152	0.96161	0.999998	17333	0	4.7843	0.016665	0.053999	0.951403	992	4	4.7843
BHLHE41	4	0.85216	0.8629	0.999238	15525	1	4.9957	0.01669	0.054063	0.951403	993	3	4.9957
FITM2	4	0.95393	0.95407	0.999998	17198	0	5.7712	0.01674	0.054217	0.951403	994	4	5.7712
DTHD1	4	0.98326	0.98336	0.999998	17730	0	4.5238	0.016743	0.054228	0.951403	995	4	4.5238
MAD2L1	4	0.62544	0.7572	0.999238	13486	1	4.0255	0.016761	0.054281	0.951403	996	3	4.0255
TMEM205	4	0.87159	0.87698	0.999238	15787	1	5.7525	0.016761	0.054282	0.951403	997	3	5.7525
TPRG1L	4	0.8669	0.87345	0.999238	15722	1	5.1848	0.016765	0.0543	0.951403	998	3	5.1848
FAM46D	4	0.85107	0.86219	0.999238	15513	1	0.32546	0.016817	0.05444	0.951403	999	2	0.32546
ACBD3	4	0.94073	0.94089	0.999998	16975	0	4.3493	0.016841	0.054514	0.951403	1001	3	4.3493
RGS3	4	0.98314	0.98323	0.999998	17726	0	4.0349	0.016859	0.054555	0.951403	1003	4	4.0349
PHF11	4	0.98314	0.98323	0.999998	17727	0	3.971	0.016859	0.054555	0.951403	1004	4	3.971
SLC9A1	4	0.98314	0.98323	0.999998	17728	0	5.7178	0.016859	0.054555	0.951403	1002	4	5.7178
SLMAP	4	0.84031	0.85507	0.999238	15377	1	5.9703	0.016867	0.054582	0.951403	1005	3	5.9703
NR3C2	4	0.59548	0.73663	0.999238	13096	1	2.8625	0.016874	0.054605	0.951403	1006	2	2.8625
MFN1	4	0.9831	0.9832	0.999998	17725	0	5.709	0.016901	0.054675	0.951403	1007	4	5.709
BAIAP2L2	4	0.20264	0.38441	0.996369	6825	1	0.88779	0.01693	0.054763	0.951403	1008	2	0.88779
MUM1L1	4	0.98306	0.98316	0.999998	17724	0	4.9189	0.016935	0.054783	0.951403	1009	4	4.9189
RND2	4	0.98305	0.98315	0.999998	17723	0	3.9484	0.016952	0.054836	0.951403	1010	4	3.9484
PPIA	2	0.96999	0.97014	0.999998	17488	0	6.2819	0.03001	0.054846	0.951403	1668	2	6.2819
MANEAL	4	0.98304	0.98314	0.999998	17722	0	5.7788	0.016962	0.05487	0.951403	1011	4	5.7788
CIB3	4	0.91184	0.91196	0.999238	16450	0	4.3222	0.016986	0.054937	0.951403	1012	3	4.3222
FHL3	4	0.51008	0.66378	0.999238	11817	2	2.7517	0.017035	0.055083	0.951403	1013	2	2.7517
SLC10A1	4	0.17152	0.33836	0.996369	5991	2	2.3807	0.017043	0.055111	0.951403	1014	2	2.3807
ZNF585B	2	0.94911	0.94912	0.999998	17131	0	7.1972	0.030179	0.055146	0.951403	1678	2	7.1972
PDLIM7	4	0.972	0.97222	0.999998	17523	0	5.8409	0.017059	0.055158	0.951403	1015	4	5.8409
MLIP	4	0.98294	0.98305	0.999998	17721	0	6.352	0.017064	0.055175	0.951403	1016	4	6.352
ZNF366	3	0.97849	0.97864	0.999998	17642	0	5.6881	0.021513	0.055328	0.951403	1255	3	5.6881
ZNF677	4	0.82565	0.84592	0.999238	15202	1	1.5059	0.017155	0.055441	0.951403	1017	2	1.5059
UTS2B	4	0.98283	0.98294	0.999998	17720	0	5.9542	0.017172	0.055489	0.951403	1018	4	5.9542
MX2	4	0.9828	0.98291	0.999998	17719	0	3.8375	0.017197	0.055559	0.951403	1019	4	3.8375
SLC25A18	4	0.53502	0.68491	0.999238	12191	1	2.8279	0.017212	0.055603	0.951403	1020	3	2.8279
ATP13A2	4	0.98278	0.98289	0.999998	17718	0	4.3684	0.017219	0.055621	0.951403	1021	4	4.3684
HILPDA	4	0.10102	0.22675	0.996369	4039	1	6.4094	0.01723	0.055653	0.951403	1022	3	6.4094
KCNJ12	4	0.98275	0.98286	0.999998	17717	0	4.3765	0.017248	0.055717	0.951403	1023	4	4.3765
DCHS1	4	0.54563	0.69404	0.999238	12340	2	-0.81059	0.017268	0.055775	0.951403	1024	1	-0.81059
KCNQ5	4	0.95444	0.95457	0.999998	17206	0	6.3615	0.017272	0.055785	0.951403	1025	4	6.3615
FOLR4	4	0.98271	0.98282	0.999998	17715	0	5.4275	0.017285	0.055822	0.951403	1026	4	5.4275
CD226	4	0.88094	0.88426	0.999238	15937	1	5.853	0.017297	0.055861	0.951403	1028	3	5.853
HIST1H2BC	1	0.94404	0.9444	0.999998	17032	0	7.4479	0.055961	0.055885	0.951403	2795	1	7.4479
PIF1	4	0.97003	0.97018	0.999998	17491	0	6.263	0.017305	0.055892	0.951403	1029	4	6.263
PES1	4	0.081513	0.1942	0.995321	3463	3	-3.8786	0.017325	0.055949	0.951403	1030	1	-3.8786
CDH2	4	0.97642	0.9767	0.999998	17600	0	5.0665	0.01738	0.056102	0.951403	1031	4	5.0665
OR52N4	4	0.86892	0.87499	0.999238	15752	1	1.3861	0.017381	0.056105	0.951403	1032	3	1.3861
SLC29A2	4	0.98262	0.98273	0.999998	17714	0	4.2758	0.017382	0.056108	0.951403	1033	4	4.2758
EEF2K	4	0.1322	0.27724	0.996369	4907	1	3.6917	0.017408	0.056189	0.951403	1034	2	3.6917
INTS9	4	0.49019	0.64694	0.999238	11470	1	5.3726	0.017434	0.056271	0.951403	1035	3	5.3726
DARS	4	0.06692	0.16876	0.995321	2990	3	-1.3506	0.017437	0.056276	0.951403	1036	1	-1.3506
ROM1	4	0.57831	0.72191	0.999238	12844	1	5.9057	0.017492	0.056421	0.951403	1037	3	5.9057
NR1H2	4	0.60968	0.74891	0.999238	13324	2	0.79891	0.017494	0.056426	0.951403	1038	2	0.79891
HFE	4	0.20594	0.38924	0.996369	6917	2	2.7631	0.01752	0.056503	0.951403	1039	2	2.7631
ALDOC	4	0.12282	0.2623	0.996369	4646	2	1.8936	0.017537	0.056557	0.951403	1040	2	1.8936
PLRG1	4	0.13837	0.2871	0.996369	5062	2	0.20146	0.01755	0.056594	0.951403	1041	2	0.20146
CD99L2	3	0.97794	0.97811	0.999998	17631	0	6.2807	0.022057	0.056619	0.951403	1283	3	6.2807
PPAN	4	0.067083	0.16904	0.995321	2997	1	5.9337	0.017558	0.05662	0.951403	1042	3	5.9337
REL	4	0.7943	0.82818	0.999238	14852	1	4.2403	0.017597	0.056732	0.951403	1043	3	4.2403
HTR1F	4	0.98239	0.9825	0.999998	17713	0	5.1219	0.01761	0.056767	0.951403	1044	4	5.1219
GRASP	4	0.98238	0.98249	0.999998	17712	0	3.9772	0.017624	0.056802	0.951403	1045	4	3.9772
FGF23	4	0.70671	0.78734	0.999238	14083	1	2.8	0.017648	0.056866	0.951403	1046	2	2.8
ORMDL2	4	0.0037336	0.013056	0.853311	265	1	1.6535	0.017662	0.056908	0.951403	1047	3	1.6535
UTP18	4	0.95829	0.95844	0.999998	17267	0	2.6977	0.017674	0.056938	0.951403	1048	4	2.6977
MCOLN3	4	0.85678	0.86616	0.999238	15596	1	5.1479	0.017709	0.057043	0.951403	1049	3	5.1479
C9orf69	4	0.68429	0.77852	0.999238	13890	1	5.6819	0.017719	0.057069	0.951403	1050	3	5.6819
ZNF599	4	0.98227	0.98237	0.999998	17711	0	4.441	0.017726	0.057093	0.951403	1051	4	4.441
GPR97	4	0.31958	0.50613	0.999238	8945	1	6.1461	0.017743	0.057145	0.951403	1052	3	6.1461
ADRBK1	4	0.69943	0.78444	0.999238	14018	1	6.1248	0.01776	0.057191	0.951403	1053	3	6.1248
PPT1	4	0.85778	0.86685	0.999238	15611	1	5.9959	0.017772	0.057222	0.951403	1054	3	5.9959
YKT6	4	0.046901	0.13302	0.978559	2386	2	2.0632	0.017775	0.057233	0.951403	1055	2	2.0632
F12	4	0.98222	0.98233	0.999998	17709	0	4.8543	0.017776	0.057236	0.951403	1056	4	4.8543
CTSD	4	0.98222	0.98232	0.999998	17708	0	4.3951	0.017782	0.057252	0.951403	1057	4	4.3951
FBXO18	4	0.36097	0.53974	0.999238	9579	2	2.1929	0.017821	0.057372	0.951403	1060	2	2.1929
PAPOLG	4	0.97731	0.97759	0.999998	17618	0	4.7683	0.017831	0.057396	0.951403	1061	4	4.7683
SKAP2	4	0.98217	0.98226	0.999998	17707	0	5.817	0.017832	0.057396	0.951403	1062	4	5.817
R3HDM1	4	0.96086	0.96099	0.999998	17318	0	5.9701	0.017852	0.057449	0.951403	1064	4	5.9701
FGD5	4	0.32965	0.51429	0.999238	9102	2	3.3289	0.017855	0.057457	0.951403	1065	2	3.3289
PHF8	4	0.98213	0.98223	0.999998	17705	0	4.516	0.017871	0.057493	0.951403	1066	4	4.516
SLC35F3	4	0.038337	0.11424	0.966908	2058	1	-0.65266	0.017888	0.057547	0.951403	1068	3	-0.65266
TSPAN31	4	0.98211	0.98222	0.999998	17704	0	4.5058	0.017887	0.057547	0.951403	1067	4	4.5058
EPCAM	4	0.57156	0.71607	0.999238	12734	1	5.3576	0.017898	0.057587	0.951403	1069	3	5.3576
TMEM214	3	0.83273	0.83263	0.999238	15286	1	3.195	0.022497	0.057662	0.951403	1302	2	3.195
FAM171B	4	0.39103	0.56434	0.999238	10007	1	5.9542	0.017933	0.057684	0.951403	1070	3	5.9542
TMEM121	4	0.98205	0.98216	0.999998	17703	0	4.3281	0.017955	0.057751	0.951403	1071	4	4.3281
MYBBP1A	4	0.46414	0.62505	0.999238	11096	1	5.9577	0.017962	0.057772	0.951403	1072	3	5.9577
SLC12A5	3	0.80703	0.80857	0.999238	14994	1	0.35282	0.022624	0.057966	0.951403	1306	1	0.35282
HMOX2	4	0.98196	0.98207	0.999998	17702	0	3.2597	0.018041	0.057992	0.951403	1073	4	3.2597
MYPOP	4	0.31994	0.5064	0.999238	8949	1	3.9305	0.018057	0.058047	0.951403	1074	3	3.9305
DNLZ	4	0.98194	0.98205	0.999998	17700	0	3.9521	0.018058	0.058053	0.951403	1075	4	3.9521
ARSJ	3	0.97731	0.9775	0.999998	17619	0	4.6685	0.022693	0.058153	0.951403	1312	3	4.6685
TBC1D19	4	0.62452	0.75689	0.999238	13482	1	5.8744	0.018098	0.058164	0.951403	1077	3	5.8744
LMOD3	4	0.98189	0.98201	0.999998	17699	0	5.8978	0.018112	0.058203	0.951403	1078	4	5.8978
PAPOLB	4	0.76665	0.81402	0.999238	14571	1	5.8544	0.018113	0.058207	0.951403	1079	3	5.8544
PLXND1	4	0.98186	0.98198	0.999998	17697	0	5.2302	0.01814	0.058285	0.951403	1080	4	5.2302
SCMH1	4	0.29694	0.48771	0.999238	8605	2	0.62215	0.018169	0.058375	0.951403	1082	2	0.62215
KCNJ13	4	0.70287	0.78579	0.999238	14049	1	2.7589	0.018193	0.058435	0.951403	1083	2	2.7589
GNAS	4	0.96175	0.96185	0.999998	17337	0	5.7338	0.018199	0.058449	0.951403	1084	4	5.7338
BCL3	4	0.5182	0.67071	0.999238	11946	2	1.5323	0.018226	0.058525	0.951403	1085	2	1.5323
MTPN	4	0.17989	0.35086	0.996369	6214	1	5.8127	0.018228	0.058534	0.951403	1086	3	5.8127
CYP2J2	4	0.42771	0.59478	0.999238	10537	1	5.7502	0.018234	0.05855	0.951403	1087	3	5.7502
LHX5	4	0.83921	0.85438	0.999238	15362	1	5.7305	0.018302	0.058759	0.951403	1088	3	5.7305
PARD6B	4	0.33037	0.51484	0.999238	9117	2	2.8756	0.018316	0.058805	0.951403	1090	2	2.8756
SIRPB2	4	0.49183	0.64837	0.999238	11501	1	4.7317	0.018338	0.058869	0.951403	1092	3	4.7317
RNF103	4	0.18163	0.35349	0.996369	6274	1	6.0338	0.018358	0.058919	0.951403	1093	3	6.0338
CACNA1I	4	0.50699	0.66123	0.999238	11763	1	6.2218	0.018368	0.058958	0.951403	1094	3	6.2218
CYP26C1	4	0.54094	0.69001	0.999238	12277	2	3.2814	0.018394	0.059042	0.951403	1095	2	3.2814
SIRPD	4	0.98158	0.98168	0.999998	17694	0	4.6685	0.018424	0.059143	0.951403	1096	4	4.6685
ZNF33A	4	0.31851	0.50526	0.999238	8924	1	-0.039078	0.018451	0.059228	0.951403	1097	2	-0.039078
ITGB6	4	0.98154	0.98165	0.999998	17693	0	3.9604	0.018455	0.059238	0.951403	1098	4	3.9604
ZNF180	4	0.2403	0.43805	0.999238	7748	1	4.1642	0.018464	0.05927	0.951403	1099	3	4.1642
PSMD14	4	0.34281	0.52494	0.999238	9296	2	2.0803	0.018507	0.059396	0.951403	1101	2	2.0803
PTPRN2	4	0.87609	0.88047	0.999238	15857	1	5.7183	0.018521	0.059432	0.951403	1102	3	5.7183
GPR162	4	0.047698	0.13446	0.980208	2414	2	1.611	0.018563	0.059559	0.951403	1103	2	1.611
LZTS2	4	0.48664	0.64397	0.999238	11416	2	3.1689	0.01857	0.059574	0.951403	1104	2	3.1689
ERLIN1	4	0.9814	0.98151	0.999998	17691	0	4.9193	0.018601	0.059664	0.951403	1105	4	4.9193
AOC3	4	0.69388	0.78225	0.999238	13970	1	1.4096	0.01862	0.059714	0.951403	1106	2	1.4096
BTRC	3	0.42646	0.57958	0.999238	10518	1	5.0552	0.023383	0.059795	0.951403	1343	2	5.0552
C9orf40	4	0.98135	0.98147	0.999998	17690	0	4.6422	0.018653	0.059809	0.951403	1107	4	4.6422
PDHB	4	0.62426	0.75679	0.999238	13478	1	6.3804	0.018668	0.059852	0.951403	1108	3	6.3804
C20orf24	4	0.16494	0.32836	0.996369	5815	3	-1.3672	0.018676	0.059875	0.951403	1109	1	-1.3672
NEBL	4	0.98132	0.98144	0.999998	17689	0	4.3956	0.018679	0.059881	0.951403	1110	4	4.3956
IFI35	4	0.7686	0.81501	0.999238	14591	1	5.7997	0.018684	0.059891	0.951403	1111	3	5.7997
PLXNA1	4	0.98131	0.98143	0.999998	17688	0	4.5465	0.018694	0.059914	0.951403	1112	4	4.5465
CD81	4	0.18439	0.35756	0.996369	6349	3	-1.4357	0.018732	0.060027	0.951403	1113	1	-1.4357
MARCKS	4	0.87362	0.87854	0.999238	15819	1	6.1928	0.018777	0.060137	0.951403	1114	3	6.1928
CABYR	4	0.27114	0.46676	0.999238	8262	2	-1.1178	0.018788	0.060167	0.951403	1115	2	-1.1178
PWWP2B	4	0.22162	0.41178	0.998474	7317	2	2.1784	0.018799	0.060197	0.951403	1116	2	2.1784
USP15	4	0.55312	0.70038	0.999238	12454	1	5.8576	0.018803	0.060209	0.951403	1117	3	5.8576
DSC2	4	0.8621	0.86994	0.999238	15666	1	5.5094	0.018803	0.060209	0.951403	1118	3	5.5094
TMEM260	4	0.25586	0.45434	0.999238	8046	2	0.042324	0.018845	0.060329	0.951403	1119	2	0.042324
SLC2A11	4	0.98112	0.98124	0.999998	17686	0	4.5893	0.018882	0.060439	0.951403	1120	4	4.5893
NELL2	4	0.099776	0.22475	0.996369	3996	2	2.3129	0.018914	0.060531	0.951403	1121	2	2.3129
PSKH2	4	0.56932	0.71419	0.999238	12700	2	3.2864	0.01895	0.060628	0.951403	1122	2	3.2864
MS4A10	4	0.98105	0.98117	0.999998	17684	0	4.6417	0.018952	0.060633	0.951403	1123	4	4.6417
GUK1	4	0.062985	0.16172	0.995321	2880	1	4.5241	0.018957	0.060656	0.951403	1124	3	4.5241
MUC5B	4	0.96408	0.96421	0.999998	17390	0	5.6322	0.018973	0.060695	0.951403	1125	4	5.6322
TGM3	4	0.98102	0.98115	0.999998	17683	0	5.0929	0.018975	0.0607	0.951403	1126	4	5.0929
MEDAG	4	0.20979	0.3949	0.996369	7015	2	0.90352	0.019014	0.060823	0.951403	1127	2	0.90352
JAZF1	4	0.56004	0.70636	0.999238	12547	1	6.1005	0.019017	0.060833	0.951403	1128	3	6.1005
OR6N2	4	0.30603	0.49507	0.999238	8747	1	5.6719	0.019069	0.060994	0.951403	1129	3	5.6719
CCDC43	4	0.51851	0.67098	0.999238	11953	2	1.4401	0.01907	0.060994	0.951403	1130	2	1.4401
ARHGAP20	3	0.039975	0.097927	0.966908	2144	1	6.7612	0.023896	0.061022	0.951403	1372	2	6.7612
ARPC1A	4	0.64458	0.7638	0.999238	13585	1	6.2056	0.019087	0.061047	0.951403	1131	3	6.2056
C11orf21	4	0.95276	0.95292	0.999998	17182	0	6.0459	0.01911	0.0611	0.951403	1132	4	6.0459
DSCAML1	4	0.85219	0.86293	0.999238	15526	1	0.44691	0.019126	0.061145	0.951403	1133	2	0.44691
USP18	4	0.38866	0.56238	0.999238	9982	1	5.5379	0.019145	0.061194	0.951403	1134	3	5.5379
OR9I1	4	0.53849	0.68789	0.999238	12236	2	3.2462	0.019172	0.061277	0.951403	1135	2	3.2462
MYO19	4	0.19318	0.37052	0.996369	6594	2	2.5101	0.019208	0.061377	0.951403	1136	2	2.5101
PALD1	4	0.70211	0.7855	0.999238	14043	1	5.1368	0.019215	0.061396	0.951403	1137	3	5.1368
MGST2	4	0.5496	0.69739	0.999238	12403	1	5.7308	0.019223	0.061426	0.951403	1138	3	5.7308
GPR62	4	0.81733	0.84102	0.999238	15108	1	3.5196	0.019235	0.061463	0.951403	1139	2	3.5196
CEP164	4	0.98075	0.98089	0.999998	17682	0	5.822	0.019248	0.06151	0.951403	1140	4	5.822
TYW1	4	0.98073	0.98087	0.999998	17681	0	3.7159	0.019275	0.061581	0.951403	1141	4	3.7159
C6orf132	4	0.85461	0.86462	0.999238	15562	1	4.5738	0.019279	0.0616	0.951403	1142	3	4.5738
BCL6	4	0.791	0.82643	0.999238	14813	1	5.7829	0.019299	0.061664	0.951403	1143	3	5.7829
ARL8A	4	0.14787	0.30189	0.996369	5350	1	5.6933	0.019329	0.061763	0.951403	1144	3	5.6933
METAP2	4	0.98067	0.98082	0.999998	17680	0	4.2748	0.019331	0.061769	0.951403	1145	4	4.2748
SMIM18	4	0.88245	0.88549	0.999238	15957	1	5.968	0.019351	0.061821	0.951403	1146	3	5.968
XCR1	4	0.93732	0.93751	0.999238	16913	0	5.8679	0.019383	0.061911	0.951403	1148	3	5.8679
RRM1	4	0.030943	0.0944	0.961578	1730	2	1.198	0.019396	0.061954	0.951403	1149	2	1.198
SDCCAG8	4	0.9806	0.98076	0.999998	17678	0	4.0708	0.019405	0.061982	0.951403	1150	4	4.0708
AEBP1	4	0.89734	0.89818	0.999238	16194	1	5.5694	0.019409	0.061993	0.951403	1151	3	5.5694
RTP1	4	0.11013	0.24179	0.996369	4289	2	0.84311	0.019435	0.062064	0.951403	1152	2	0.84311
SERBP1	4	0.8844	0.88709	0.999238	15980	1	5.7302	0.019454	0.06212	0.951403	1153	3	5.7302
PRR15	4	0.60239	0.74265	0.999238	13212	1	6.3954	0.019459	0.062137	0.951403	1154	3	6.3954
PBRM1	4	0.97756	0.97784	0.999998	17624	0	5.828	0.019467	0.06216	0.951403	1155	4	5.828
ADORA3	4	0.98051	0.98068	0.999998	17677	0	4.1686	0.019488	0.062218	0.951403	1156	4	4.1686
C18orf21	4	0.027939	0.086015	0.953087	1594	2	2.0505	0.019495	0.062238	0.951403	1157	2	2.0505
ANKS1B	4	0.28507	0.478	0.999238	8463	2	2.9173	0.019504	0.06226	0.951403	1158	2	2.9173
OR2L5	2	0.96576	0.96589	0.999998	17421	0	5.639	0.034238	0.062262	0.951403	1871	2	5.639
SLC25A20	4	0.86861	0.87475	0.999238	15747	1	6.428	0.019522	0.062311	0.951403	1159	3	6.428
SPAG16	4	0.49701	0.65277	0.999238	11591	1	6.0772	0.019529	0.062326	0.951403	1160	3	6.0772
C1orf53	4	0.75977	0.81075	0.999238	14516	1	6.2939	0.019538	0.062349	0.951403	1161	3	6.2939
PKIG	4	0.49401	0.65025	0.999238	11538	1	5.9611	0.019543	0.062364	0.951403	1162	3	5.9611
RWDD2A	4	0.98045	0.98063	0.999998	17676	0	4.5382	0.019551	0.06238	0.951403	1163	4	4.5382
LDB2	4	0.67349	0.77434	0.999238	13801	1	4.9894	0.019576	0.062453	0.951403	1164	3	4.9894
SLC3A1	4	0.98039	0.98057	0.999998	17675	0	5.0274	0.019607	0.062534	0.951403	1165	4	5.0274
PLOD3	4	0.98039	0.98057	0.999998	17674	0	5.691	0.01961	0.062543	0.951403	1166	4	5.691
FOXR1	4	0.17055	0.33687	0.996369	5969	1	4.8489	0.019632	0.062612	0.951403	1167	3	4.8489
RP11-93B14.6	4	0.98035	0.98053	0.999998	17673	0	4.2306	0.019646	0.062664	0.951403	1168	4	4.2306
CA1	4	0.85083	0.86202	0.999238	15512	1	3.9582	0.019689	0.062782	0.951403	1170	3	3.9582
MAOB	4	0.42819	0.59518	0.999238	10546	2	0.81168	0.019693	0.062795	0.951403	1171	2	0.81168
PEPD	4	0.9803	0.98049	0.999998	17671	0	4.284	0.019697	0.062813	0.951403	1172	4	4.284
RRAS2	4	0.32845	0.51329	0.999238	9087	2	-0.80977	0.019745	0.062952	0.951403	1173	1	-0.80977
OR52I1	2	0.96535	0.96548	0.999998	17415	0	5.605	0.034651	0.062952	0.951403	1896	2	5.605
CDH22	3	0.97528	0.97549	0.999998	17574	0	5.5953	0.024716	0.062968	0.951403	1415	3	5.5953
PRDM16	4	0.98022	0.98041	0.999998	17670	0	5.2353	0.019775	0.063045	0.951403	1174	4	5.2353
S1PR1	4	0.84329	0.85699	0.999238	15412	1	6.2025	0.019838	0.063224	0.951403	1175	3	6.2025
KIAA1614	4	0.94039	0.94057	0.999998	16967	0	3.2747	0.019857	0.063287	0.951403	1176	2	3.2747
PHYHD1	4	0.96332	0.96343	0.999998	17370	0	5.6312	0.019865	0.063304	0.951403	1177	4	5.6312
GLTP	4	0.98013	0.98032	0.999998	17669	0	4.8243	0.019869	0.063322	0.951403	1178	4	4.8243
OR5B12	4	0.98013	0.98031	0.999998	17668	0	4.059	0.019872	0.063335	0.951403	1179	4	4.059
ZMYM3	4	0.55876	0.70524	0.999238	12527	1	4.8674	0.01991	0.063448	0.951403	1180	3	4.8674
PPP2R5B	4	0.98004	0.98021	0.999998	17666	0	4.0395	0.019963	0.063612	0.951403	1181	4	4.0395
PPP5C	4	0.57941	0.72289	0.999238	12863	1	4.731	0.01997	0.063632	0.951403	1182	3	4.731
SHISA2	4	0.80929	0.83639	0.999238	15017	1	6.0978	0.019983	0.063672	0.951403	1183	3	6.0978
WDR54	4	0.16076	0.32199	0.996369	5695	3	-1.5292	0.020026	0.063784	0.951403	1184	1	-1.5292
HNF1A	4	0.9799	0.98009	0.999998	17663	0	4.8135	0.020099	0.063994	0.951403	1186	4	4.8135
PACRG	4	0.97989	0.98008	0.999998	17662	0	4.3074	0.020109	0.064019	0.951403	1187	4	4.3074
KIAA1109	4	0.78632	0.82398	0.999238	14764	1	5.4371	0.020138	0.06411	0.951403	1188	3	5.4371
CLSTN3	4	0.39161	0.56478	0.999238	10013	2	1.1431	0.020195	0.064257	0.951403	1189	2	1.1431
NCF1	4	0.19544	0.37382	0.996369	6648	1	5.2648	0.020217	0.064327	0.951403	1197	3	5.2648
CCNDBP1	4	0.45264	0.61534	0.999238	10931	1	4.6207	0.020217	0.064327	0.951403	1193	3	4.6207
SLCO4C1	4	0.47886	0.63747	0.999238	11306	1	4.9381	0.020217	0.064327	0.951403	1198	3	4.9381
SPATA12	4	0.51183	0.66528	0.999238	11844	1	5.082	0.020217	0.064327	0.951403	1194	3	5.082
VPS18	4	0.72246	0.79396	0.999238	14201	1	5.0445	0.020217	0.064327	0.951403	1191	3	5.0445
ELF4	4	0.93118	0.93145	0.999238	16808	0	4.7414	0.020217	0.064327	0.951403	1200	3	4.7414
SLC22A1	4	0.93204	0.93225	0.999238	16820	0	5.0791	0.020217	0.064327	0.951403	1190	3	5.0791
ABCA4	4	0.93732	0.93751	0.999238	16924	0	4.5947	0.020217	0.064327	0.951403	1192	3	4.5947
CRLF1	4	0.96135	0.96143	0.999998	17328	0	4.6344	0.020217	0.064327	0.951403	1195	4	4.6344
MEPE	4	0.96468	0.9648	0.999998	17397	0	4.7214	0.020217	0.064327	0.951403	1199	4	4.7214
ACOT11	4	0.96684	0.96697	0.999998	17436	0	5.1193	0.020217	0.064327	0.951403	1196	4	5.1193
CTDSPL	4	0.9697	0.96983	0.999998	17482	0	4.652	0.020217	0.064327	0.951403	1201	4	4.652
AP1G2	4	0.21894	0.40801	0.997606	7257	2	2.1396	0.020251	0.064424	0.951403	1203	2	2.1396
FGFR1OP2	4	0.97974	0.97994	0.999998	17658	0	4.0381	0.020264	0.064457	0.951403	1204	4	4.0381
USP45	4	0.52374	0.67551	0.999238	12019	2	3.1563	0.020293	0.064544	0.951403	1205	2	3.1563
FCAMR	4	0.9797	0.97991	0.999998	17657	0	4.1622	0.020295	0.064553	0.951403	1206	4	4.1622
BCL7C	4	0.27584	0.4705	0.999238	8323	2	0.89059	0.020307	0.064582	0.951403	1207	2	0.89059
SHROOM3	4	0.67986	0.77678	0.999238	13849	1	3.4619	0.02033	0.064643	0.951403	1208	2	3.4619
ARID3C	4	0.97966	0.97987	0.999998	17656	0	3.9626	0.02034	0.064674	0.951403	1209	4	3.9626
OPN1SW	4	0.68898	0.78033	0.999238	13929	1	4.7928	0.020419	0.064894	0.953861	1210	3	4.7928
C19orf18	4	0.97955	0.97976	0.999998	17655	0	5.0085	0.020452	0.064994	0.954551	1211	4	5.0085
FN1	4	0.035979	0.10803	0.966908	1943	2	2.0832	0.020476	0.065065	0.954822	1212	2	2.0832
OR13C8	4	0.97947	0.97969	0.999998	17654	0	4.1782	0.020531	0.065235	0.954836	1213	4	4.1782
TMEM132A	4	0.95298	0.95314	0.999998	17186	0	5.2245	0.02056	0.065313	0.954836	1214	4	5.2245
C2orf62	4	0.42129	0.58944	0.999238	10444	2	1.003	0.02056	0.065314	0.954836	1216	2	1.003
GCSH	4	0.69685	0.78338	0.999238	13998	1	3.8781	0.02056	0.065314	0.954836	1215	3	3.8781
OR10V1	4	0.97943	0.97965	0.999998	17653	0	5.0975	0.020567	0.065331	0.954836	1217	4	5.0975
CHRDL1	4	0.97938	0.9796	0.999998	17652	0	5.3385	0.020622	0.065499	0.956318	1218	4	5.3385
RHOBTB2	4	0.88345	0.8863	0.999238	15971	1	5.7252	0.020701	0.065708	0.956318	1219	3	5.7252
TAS1R1	4	0.031414	0.095662	0.963551	1744	3	-2.5579	0.020729	0.065781	0.956318	1223	1	-2.5579
KAT5	4	0.53091	0.68149	0.999238	12121	2	1.3898	0.020729	0.065781	0.956318	1221	2	1.3898
ERP44	4	0.55488	0.7019	0.999238	12481	2	0.38375	0.020729	0.065781	0.956318	1222	2	0.38375
AES	4	0.69788	0.78379	0.999238	14007	1	5.3694	0.020729	0.065781	0.956318	1220	3	5.3694
RNF223	4	0.69223	0.78158	0.999238	13956	1	5.9109	0.020735	0.065803	0.956318	1224	3	5.9109
AP3M1	4	0.18429	0.35743	0.996369	6346	2	2.5429	0.020754	0.065864	0.956425	1225	2	2.5429
TAGLN2	4	0.97913	0.97936	0.999998	17650	0	5.7765	0.020781	0.065939	0.956747	1226	4	5.7765
ZP1	3	0.97399	0.97416	0.999998	17554	0	4.3714	0.026009	0.066006	0.956957	1471	3	4.3714
RFX6	4	0.97916	0.97939	0.999998	17651	0	4.4823	0.020842	0.06612	0.957841	1227	4	4.4823
TSR2	4	0.071092	0.17604	0.995321	3121	2	2.2359	0.020874	0.066211	0.958014	1228	2	2.2359
FCRL5	4	0.97911	0.97934	0.999998	17649	0	4.2092	0.020888	0.066245	0.958014	1229	4	4.2092
FLVCR2	4	0.89832	0.89905	0.999238	16215	1	5.8104	0.020923	0.066339	0.958014	1231	3	5.8104
DNAH14	4	0.89816	0.89891	0.999238	16210	1	5.8547	0.020948	0.066408	0.958014	1232	3	5.8547
NUDT8	3	0.83578	0.83564	0.999238	15323	1	4.9614	0.026203	0.066463	0.958014	1483	2	4.9614
RNF145	4	0.14772	0.30166	0.996369	5348	1	4.1771	0.020981	0.066502	0.958014	1233	3	4.1771
SAT1	4	0.89167	0.8932	0.999238	16096	1	4.5068	0.021038	0.06665	0.958014	1234	3	4.5068
RBM19	3	0.93121	0.93133	0.999238	16818	0	3.5872	0.026287	0.066661	0.958014	1487	3	3.5872
ITGB3	4	0.97895	0.97918	0.999998	17647	0	4.1055	0.021051	0.066692	0.958014	1235	4	4.1055
SPIRE2	4	0.97893	0.97917	0.999998	17646	0	3.8218	0.021067	0.066734	0.958014	1236	4	3.8218
CLPSL2	4	0.51147	0.66496	0.999238	11842	2	2.649	0.021094	0.066811	0.958014	1237	2	2.649
GPR107	3	0.97361	0.97377	0.999998	17550	0	6.5531	0.026391	0.066912	0.958014	1491	3	6.5531
PLAC8L1	4	0.60209	0.7424	0.999238	13208	2	3.1711	0.02115	0.066986	0.958014	1238	2	3.1711
ANKRD11	4	0.32497	0.51044	0.999238	9035	1	4.1997	0.021206	0.067138	0.958014	1239	3	4.1997
DHX32	4	0.45911	0.62086	0.999238	11024	2	2.9839	0.021246	0.067244	0.958014	1240	2	2.9839
XPOT	4	0.6718	0.77373	0.999238	13785	1	5.8207	0.02126	0.067285	0.958014	1241	3	5.8207
BARD1	4	0.52478	0.67637	0.999238	12034	2	-0.67606	0.021262	0.067296	0.958014	1242	1	-0.67606
PTRHD1	4	0.65736	0.76837	0.999238	13674	1	5.69	0.021274	0.067329	0.958014	1243	3	5.69
CLSTN2	4	0.9787	0.97893	0.999998	17645	0	4.1498	0.021305	0.06741	0.958014	1244	4	4.1498
EEF1D	4	0.28471	0.47772	0.999238	8460	1	2.3542	0.021318	0.067446	0.958014	1245	2	2.3542
KLF5	4	0.95145	0.95162	0.999998	17160	0	5.7649	0.021345	0.067518	0.958014	1246	4	5.7649
NDST4	3	0.021063	0.054225	0.927625	1255	2	-1.0532	0.026666	0.067594	0.958014	1501	1	-1.0532
SLC44A1	3	0.97333	0.97349	0.999998	17548	0	4.5333	0.026669	0.0676	0.958014	1502	3	4.5333
PPM1F	4	0.97862	0.97886	0.999998	17644	0	5.2512	0.021381	0.06762	0.958014	1247	4	5.2512
OLR1	4	0.46382	0.62478	0.999238	11090	1	5.9603	0.021383	0.067623	0.958014	1248	3	5.9603
NRG4	4	0.59702	0.73793	0.999238	13121	1	5.8341	0.021387	0.067635	0.958014	1249	3	5.8341
ZNF721	4	0.39626	0.56872	0.999238	10085	1	5.8961	0.021425	0.067738	0.958014	1250	3	5.8961
ITFG2	4	0.97857	0.97882	0.999998	17643	0	5.3329	0.021429	0.067748	0.958014	1251	4	5.3329
KCNJ15	4	0.23286	0.42766	0.999238	7567	2	1.2169	0.021431	0.067753	0.958014	1252	2	1.2169
ABCB1	4	0.77113	0.81623	0.999238	14629	1	5.6585	0.021463	0.067851	0.958014	1253	3	5.6585
CBFB	4	0.95048	0.95064	0.999998	17149	0	6.1113	0.02149	0.067931	0.958014	1254	4	6.1113
ZNF408	4	0.88784	0.88995	0.999238	16041	1	5.4772	0.021529	0.068041	0.958014	1256	3	5.4772
C8orf22	4	0.9688	0.96895	0.999998	17463	0	5.4258	0.021543	0.068081	0.958014	1257	4	5.4258
C3orf83	4	0.97845	0.97869	0.999998	17641	0	5.4457	0.021548	0.068099	0.958014	1258	4	5.4457
DACH2	4	0.97844	0.97868	0.999998	17640	0	5.6585	0.021557	0.068121	0.958014	1259	4	5.6585
CAPN9	4	0.41934	0.58782	0.999238	10412	1	5.9135	0.021586	0.068201	0.958014	1260	3	5.9135
SIGLEC11	4	0.10221	0.22872	0.996369	4082	3	-1.5391	0.021599	0.068239	0.958014	1261	1	-1.5391
GMCL1	4	0.9784	0.97865	0.999998	17639	0	4.6277	0.021599	0.068239	0.958014	1262	4	4.6277
KLRC4	2	0.9623	0.96241	0.999998	17345	0	5.885	0.037701	0.068274	0.958014	2048	2	5.885
KBTBD6	4	0.97835	0.9786	0.999998	17638	0	3.9479	0.021647	0.068377	0.958014	1263	4	3.9479
CYB5R2	4	0.71686	0.79157	0.999238	14158	1	1.1413	0.021655	0.0684	0.958014	1264	3	1.1413
SLC30A3	4	0.97831	0.97855	0.999998	17637	0	5.4409	0.021689	0.068504	0.958014	1265	4	5.4409
GPR151	4	0.78019	0.82078	0.999238	14716	1	5.5619	0.021691	0.068507	0.958014	1266	3	5.5619
ORC4	4	0.19544	0.37382	0.996369	6649	1	5.8712	0.0217	0.068534	0.958014	1267	3	5.8712
PVALB	4	0.86352	0.87098	0.999238	15678	1	4.6999	0.021711	0.068574	0.958014	1268	3	4.6999
TSN	4	0.97824	0.97849	0.999998	17635	0	5.4563	0.021757	0.068705	0.958014	1269	4	5.4563
SLC2A10	4	0.87574	0.88019	0.999238	15850	1	5.9081	0.021762	0.068719	0.958014	1270	3	5.9081
TPPP2	4	0.54043	0.68958	0.999238	12268	1	5.9198	0.021767	0.068732	0.958014	1271	3	5.9198
AMDHD2	4	0.1063	0.23545	0.996369	4189	1	0.80634	0.021768	0.068733	0.958014	1272	2	0.80634
DSCR8	4	0.81669	0.84065	0.999238	15099	1	6.1592	0.021805	0.068836	0.95869	1273	3	6.1592
ALS2CR11	4	0.90492	0.90525	0.999238	16310	1	1.7673	0.021824	0.068888	0.95869	1274	2	1.7673
TFDP2	4	0.80852	0.83593	0.999238	15013	1	6.0534	0.021867	0.069002	0.958822	1275	3	6.0534
ATP10D	4	0.97813	0.97839	0.999998	17634	0	5.4265	0.021867	0.069003	0.958822	1276	4	5.4265
RPA1	4	0.56373	0.7095	0.999238	12602	1	5.4337	0.021924	0.069155	0.959236	1277	3	5.4337
WNT2B	4	0.41248	0.58222	0.999238	10313	2	1.5805	0.021936	0.069193	0.959236	1279	2	1.5805
LRRC17	4	0.45753	0.61952	0.999238	11001	2	1.15	0.021936	0.069193	0.959236	1278	2	1.15
GON4L	4	0.2783	0.47253	0.999238	8368	1	5.2262	0.021981	0.06932	0.959648	1280	3	5.2262
S100A10	4	0.97802	0.97828	0.999998	17633	0	4.2568	0.021984	0.069329	0.959648	1281	4	4.2568
SLC9A4	4	0.07656	0.18557	0.995321	3301	2	1.8696	0.022048	0.069505	0.961356	1282	2	1.8696
MTERFD3	4	0.41096	0.58097	0.999238	10291	2	-0.34128	0.022104	0.06966	0.962231	1284	1	-0.34128
PPEF1	4	0.83695	0.85296	0.999238	15339	1	4.5961	0.022208	0.069967	0.962231	1285	3	4.5961
TSKS	4	0.11005	0.24164	0.996369	4286	2	-0.71362	0.022217	0.06999	0.962231	1286	2	-0.71362
HMX3	3	0.17353	0.30137	0.996369	6047	1	-3.6702	0.027717	0.070027	0.962231	1555	1	-3.6702
SLC39A11	4	0.69629	0.78316	0.999238	13992	1	5.7132	0.022237	0.070045	0.962231	1287	3	5.7132
ADORA2B	4	0.97775	0.97802	0.999998	17628	0	4.9178	0.02225	0.07008	0.962231	1288	4	4.9178
FZD2	4	0.97774	0.97802	0.999998	17627	0	4.9854	0.022256	0.070106	0.962231	1289	4	4.9854
TKTL1	4	0.97773	0.978	0.999998	17626	0	5.9503	0.022269	0.070143	0.962231	1290	4	5.9503
NELFE	4	0.55111	0.6987	0.999238	12426	2	3.2201	0.022286	0.070188	0.962231	1291	2	3.2201
ZNF32	4	0.84455	0.85781	0.999238	15434	1	4.1687	0.022296	0.07021	0.962231	1292	3	4.1687
LCN6	4	0.95704	0.95719	0.999998	17251	0	6.3067	0.022305	0.070233	0.962231	1293	4	6.3067
ANKIB1	4	0.57325	0.71748	0.999238	12760	1	5.6589	0.02231	0.070247	0.962231	1294	3	5.6589
AVPR1A	4	0.78282	0.82215	0.999238	14736	1	2.7427	0.022329	0.070307	0.962231	1295	2	2.7427
LILRB5	4	0.97767	0.97794	0.999998	17625	0	4.4547	0.022332	0.070315	0.962231	1296	4	4.4547
TRAFD1	4	0.71168	0.78935	0.999238	14118	1	5.9863	0.022397	0.070491	0.963372	1297	3	5.9863
GINS1	4	0.91229	0.91242	0.999238	16464	0	4.5646	0.022422	0.070557	0.963372	1298	3	4.5646
SLC22A8	4	0.18643	0.36064	0.996369	6402	2	2.51	0.02243	0.070579	0.963372	1299	2	2.51
CISD2	4	0.9775	0.97778	0.999998	17623	0	3.7621	0.022496	0.070765	0.963372	1300	4	3.7621
LPCAT1	4	0.68304	0.77805	0.999238	13879	1	4.5182	0.022497	0.070768	0.963372	1301	3	4.5182
TMEM213	4	0.88566	0.88813	0.999238	15998	1	4.1895	0.022553	0.070927	0.963372	1303	3	4.1895
CSNK1G3	4	0.86443	0.87164	0.999238	15687	1	5.2543	0.022554	0.070931	0.963372	1304	3	5.2543
SIX3	4	0.017325	0.055949	0.929638	1046	2	2.8473	0.022583	0.071005	0.963372	1305	2	2.8473
BRD8	3	0.90905	0.90913	0.999238	16400	0	5.1433	0.028179	0.071098	0.963372	1582	3	5.1433
GABRG3	4	0.97736	0.97765	0.999998	17621	0	4.7124	0.022644	0.071169	0.963372	1308	4	4.7124
FAM20B	4	0.88094	0.88426	0.999238	15936	1	5.8171	0.022656	0.071213	0.963372	1309	3	5.8171
PDAP1	4	0.10549	0.23409	0.996369	4167	3	-2.9979	0.022666	0.071237	0.963372	1310	1	-2.9979
NCAPD3	4	0.97015	0.9703	0.999998	17494	0	4.9527	0.022689	0.071292	0.963372	1311	4	4.9527
USP38	4	0.45677	0.61884	0.999238	10988	1	3.8494	0.022699	0.071323	0.963372	1313	2	3.8494
GALP	4	0.70089	0.78501	0.999238	14032	1	5.8632	0.022714	0.071369	0.963372	1314	3	5.8632
FAM204A	4	0.13614	0.28356	0.996369	4998	1	3.5088	0.022722	0.071394	0.963372	1315	3	3.5088
CPLX4	4	0.74927	0.80584	0.999238	14429	1	5.1979	0.022728	0.071419	0.963372	1316	3	5.1979
ISLR2	4	0.97726	0.97754	0.999998	17617	0	4.2191	0.02274	0.071456	0.963372	1317	4	4.2191
OR10H1	1	0.92853	0.92891	0.999238	16753	0	7.1233	0.071472	0.071463	0.963372	3257	1	7.1233
IKBKB	4	0.96477	0.96488	0.999998	17398	0	5.2828	0.022744	0.071466	0.963372	1318	4	5.2828
LMF1	4	0.42483	0.59237	0.999238	10490	2	1.2102	0.022778	0.071566	0.963486	1319	2	1.2102
C19orf47	4	0.9772	0.97749	0.999998	17615	0	5.156	0.022801	0.071631	0.963486	1320	4	5.156
CAMK2G	4	0.087284	0.20407	0.996369	3648	3	-2.8539	0.022834	0.071717	0.963486	1321	1	-2.8539
SI	4	0.48923	0.64614	0.999238	11453	1	5.6025	0.022842	0.071736	0.963486	1322	3	5.6025
SREK1IP1	1	0.92826	0.92865	0.999238	16752	0	7.1539	0.071744	0.071741	0.963486	3264	1	7.1539
KIAA1429	4	0.098934	0.22338	0.996369	3970	2	2.2271	0.022882	0.071835	0.963622	1323	2	2.2271
COL8A2	4	0.0012527	0.0044675	0.813301	91	3	-4.3	0.02289	0.071858	0.963622	1324	1	-4.3
MOCOS	4	0.91816	0.91832	0.999238	16566	0	5.1081	0.022916	0.07193	0.963859	1325	3	5.1081
HNRNPUL2	4	0.87719	0.8813	0.999238	15877	1	5.7235	0.022935	0.071982	0.963859	1326	3	5.7235
EDN2	4	0.63034	0.75886	0.999238	13515	1	5.5548	0.022965	0.072062	0.964208	1327	3	5.5548
CCKBR	4	0.977	0.97728	0.999998	17614	0	4.5058	0.022999	0.072175	0.964208	1328	4	4.5058
KCNN4	4	0.97699	0.97727	0.999998	17613	0	4.8558	0.023009	0.072207	0.964208	1329	4	4.8558
GADL1	4	0.35957	0.53859	0.999238	9561	1	6.2037	0.023014	0.072222	0.964208	1330	3	6.2037
JAKMIP2	3	0.67579	0.71097	0.999238	13817	1	2.8108	0.028683	0.072299	0.964217	1607	2	2.8108
PGAM2	4	0.97694	0.97722	0.999998	17612	0	4.1319	0.023056	0.072342	0.964217	1331	4	4.1319
GPR146	4	0.97692	0.9772	0.999998	17610	0	3.9932	0.02308	0.072407	0.964217	1332	4	3.9932
GBP1	4	0.9769	0.97719	0.999998	17609	0	5.4364	0.023097	0.072444	0.964217	1333	4	5.4364
MANBA	4	0.97687	0.97715	0.999998	17608	0	5.1328	0.023134	0.072561	0.964217	1334	4	5.1328
SCARF1	4	0.97686	0.97715	0.999998	17607	0	3.914	0.023141	0.072579	0.964217	1335	4	3.914
CTHRC1	4	0.97171	0.97192	0.999998	17515	0	5.5519	0.023144	0.072597	0.964217	1336	4	5.5519
ANKRD42	4	0.97683	0.97711	0.999998	17605	0	5.44	0.023168	0.072658	0.964316	1337	4	5.44
TNC	4	0.71306	0.78994	0.999238	14126	1	4.8471	0.023227	0.072835	0.964815	1338	3	4.8471
AC016722.1	4	0.4813	0.63948	0.999238	11336	1	4.4246	0.023241	0.07287	0.964815	1339	3	4.4246
APIP	4	0.97674	0.97703	0.999998	17604	0	5.466	0.023256	0.07291	0.964815	1340	4	5.466
CSF1	4	0.49968	0.65505	0.999238	11636	2	-1.0987	0.023283	0.072981	0.964815	1341	1	-1.0987
PPP3CC	4	0.97667	0.97696	0.999998	17603	0	4.4037	0.023328	0.073118	0.964815	1342	4	4.4037
MYO1B	4	0.82928	0.84819	0.999238	15244	1	1.7393	0.023395	0.073303	0.964815	1344	3	1.7393
APCS	4	0.96329	0.96339	0.999998	17369	0	5.5833	0.023427	0.073382	0.964815	1345	4	5.5833
PIGL	4	0.59235	0.73398	0.999238	13047	2	2.2724	0.023451	0.073452	0.964815	1346	2	2.2724
ANAPC2	4	0.62143	0.75583	0.999238	13455	1	2.3881	0.023456	0.073465	0.964815	1347	3	2.3881
C18orf25	4	0.54878	0.69671	0.999238	12390	1	6.0975	0.023475	0.073529	0.964815	1348	3	6.0975
EFNA5	4	0.66332	0.77053	0.999238	13722	1	3.7001	0.023505	0.073615	0.964815	1349	2	3.7001
NETO2	4	0.65104	0.76615	0.999238	13632	1	5.5526	0.023507	0.07362	0.964815	1350	3	5.5526
PKD1	4	0.42757	0.59467	0.999238	10533	2	2.7373	0.023507	0.073621	0.964815	1351	2	2.7373
TMEM185A	4	0.97648	0.97676	0.999998	17601	0	4.6628	0.023519	0.073658	0.964815	1352	4	4.6628
NKX6-3	4	0.29757	0.48822	0.999238	8619	1	5.0962	0.023563	0.073782	0.964815	1353	3	5.0962
MYH9	4	0.97641	0.97669	0.999998	17599	0	4.7308	0.023591	0.073866	0.964815	1354	4	4.7308
OR9Q2	4	0.97638	0.97666	0.999998	17598	0	4.1711	0.023615	0.073936	0.964815	1355	4	4.1711
EXOC8	4	0.14242	0.29343	0.996369	5201	1	5.3721	0.023619	0.073948	0.964815	1356	3	5.3721
NUP205	4	0.048798	0.13643	0.980452	2449	1	6.0367	0.023622	0.073954	0.964815	1357	3	6.0367
SAMD7	4	0.70089	0.78501	0.999238	14030	1	3.6659	0.023622	0.073955	0.964815	1358	2	3.6659
MS4A5	4	0.82485	0.84545	0.999238	15193	1	5.7176	0.023627	0.073969	0.964815	1359	3	5.7176
CCDC25	4	0.97636	0.97663	0.999998	17597	0	4.4918	0.023643	0.074009	0.964815	1360	4	4.4918
HPCAL1	4	0.97635	0.97662	0.999998	17596	0	4.0346	0.023653	0.074042	0.964815	1361	4	4.0346
MYF5	4	0.23239	0.42701	0.999238	7560	2	2.6529	0.023662	0.074062	0.964815	1362	2	2.6529
TTC17	4	0.63862	0.76171	0.999238	13553	1	5.3705	0.023701	0.074174	0.964815	1363	3	5.3705
LRRK1	4	0.2259	0.41786	0.999238	7408	3	-1.3262	0.023731	0.07426	0.964815	1364	1	-1.3262
AIMP2	4	0.97626	0.97654	0.999998	17595	0	4.9882	0.023743	0.074295	0.964815	1365	4	4.9882
KCNN1	3	0.051904	0.12408	0.968087	2549	1	6.5471	0.029544	0.074297	0.964815	1645	2	6.5471
GAS6	4	0.077765	0.18762	0.995321	3346	2	1.5994	0.023787	0.074422	0.964815	1366	2	1.5994
BTK	4	0.90156	0.90209	0.999238	16269	1	5.9783	0.023799	0.074457	0.964815	1367	3	5.9783
CADPS	4	0.97421	0.97445	0.999998	17560	0	5.6447	0.023838	0.074557	0.964815	1368	4	5.6447
RASA2	4	0.05397	0.14586	0.986031	2617	3	-2.774	0.023843	0.074571	0.964815	1369	1	-2.774
SPACA1	4	0.53576	0.68555	0.999238	12203	1	5.6906	0.023864	0.07463	0.964815	1370	3	5.6906
CCNI2	4	0.97613	0.9764	0.999998	17594	0	4.2456	0.023871	0.074652	0.964815	1371	4	4.2456
TRIM26	4	0.97609	0.97637	0.999998	17592	0	4.263	0.023912	0.074756	0.964815	1373	4	4.263
MINPP1	3	0.64874	0.69447	0.999238	13613	1	6.5566	0.02975	0.074782	0.964815	1650	2	6.5566
THEMIS	4	0.97605	0.97633	0.999998	17591	0	4.8702	0.02395	0.074875	0.964815	1374	4	4.8702
P4HTM	4	0.43106	0.59751	0.999238	10583	2	3.1857	0.023955	0.074893	0.964815	1375	2	3.1857
DSG1	4	0.70378	0.78614	0.999238	14053	1	5.6762	0.023965	0.074921	0.964815	1376	3	5.6762
MAPK6	4	0.97602	0.9763	0.999998	17590	0	4.0044	0.023978	0.07496	0.964815	1377	4	4.0044
SEMA5A	4	0.49401	0.65025	0.999238	11537	2	0.28541	0.024012	0.075044	0.964815	1378	2	0.28541
CHMP2B	4	0.11597	0.25123	0.996369	4455	1	4.927	0.024046	0.075133	0.964815	1379	3	4.927
USP6NL	4	0.5967	0.73767	0.999238	13117	1	5.8321	0.024095	0.075273	0.964815	1380	3	5.8321
DIS3L	4	0.97589	0.97616	0.999998	17588	0	4.7373	0.024107	0.075306	0.964815	1381	4	4.7373
PRPF40A	4	0.053672	0.14531	0.984987	2609	2	1.0776	0.024124	0.075352	0.964815	1382	2	1.0776
SDPR	4	0.84783	0.85999	0.999238	15473	1	3.5591	0.024124	0.075352	0.964815	1383	3	3.5591
VWA1	4	0.7245	0.79484	0.999238	14219	1	5.0752	0.024155	0.075445	0.964815	1384	3	5.0752
AKR1C2	1	0.9244	0.92497	0.999238	16673	0	7.0605	0.075596	0.075585	0.964815	3384	1	7.0605
XG	4	0.97577	0.97603	0.999998	17586	0	4.0903	0.024226	0.075649	0.964815	1385	4	4.0903
ANP32A	4	0.1344	0.28079	0.996369	4964	3	-3.5937	0.024236	0.075678	0.964815	1386	1	-3.5937
CARD14	4	0.97574	0.976	0.999998	17585	0	4.0966	0.024258	0.075746	0.964815	1387	4	4.0966
HSPB8	4	0.97573	0.97599	0.999998	17584	0	4.1926	0.024268	0.075773	0.964815	1388	4	4.1926
MPP2	4	0.97572	0.97598	0.999998	17583	0	4.3181	0.024275	0.075794	0.964815	1389	4	4.3181
PLA2G4A	4	0.57044	0.71517	0.999238	12720	2	2.9202	0.024292	0.075833	0.964815	1390	2	2.9202
UPK1B	4	0.9757	0.97596	0.999998	17582	0	4.056	0.024296	0.075844	0.964815	1391	4	4.056
PCDHA9	4	0.97567	0.97592	0.999998	17581	0	4.556	0.024335	0.07595	0.964815	1392	4	4.556
ME2	4	0.97563	0.97588	0.999998	17580	0	4.9389	0.024374	0.076058	0.964815	1393	4	4.9389
CXorf64	4	0.0089883	0.030139	0.901153	580	3	-1.6193	0.024376	0.076067	0.964815	1395	1	-1.6193
IKZF1	4	0.082681	0.19618	0.995321	3506	3	-2.1573	0.024376	0.076067	0.964815	1394	1	-2.1573
XIRP2	4	0.97561	0.97587	0.999998	17579	0	3.2099	0.024388	0.076104	0.964815	1396	4	3.2099
RAG2	4	0.76042	0.81107	0.999238	14524	1	5.7971	0.024403	0.076146	0.964815	1397	3	5.7971
BBX	4	0.97559	0.97584	0.999998	17578	0	3.4656	0.024409	0.076164	0.964815	1398	4	3.4656
DEFB118	4	0.97548	0.97573	0.999998	17577	0	4.7652	0.024522	0.076464	0.964815	1399	4	4.7652
CHL1	4	0.5512	0.69878	0.999238	12427	2	3.2454	0.024533	0.076488	0.964815	1400	2	3.2454
ATP6V0E2	4	0.2032	0.3852	0.996369	6842	1	4.5112	0.024544	0.076519	0.964815	1402	3	4.5112
ADCYAP1R1	4	0.37818	0.55376	0.999238	9829	2	1.8777	0.024544	0.076519	0.964815	1401	2	1.8777
AMPD1	4	0.82973	0.8485	0.999238	15251	1	5.0022	0.024572	0.076596	0.964815	1403	3	5.0022
TBC1D29	4	0.97539	0.97563	0.999998	17576	0	4.7029	0.024607	0.076691	0.964815	1404	4	4.7029
FAM89A	4	0.057225	0.15161	0.987212	2714	2	1.9747	0.024622	0.076743	0.964815	1405	2	1.9747
LURAP1L	4	0.91026	0.91043	0.999238	16425	1	1.234	0.024628	0.076761	0.964815	1406	2	1.234
GAL3ST1	4	0.85942	0.86799	0.999238	15630	1	5.2421	0.024632	0.076774	0.964815	1407	3	5.2421
NUMBL	4	0.7991	0.8308	0.999238	14912	1	3.6438	0.024642	0.076794	0.964815	1409	2	3.6438
UNC5A	4	0.97536	0.9756	0.999998	17575	0	4.6492	0.024642	0.076794	0.964815	1408	4	4.6492
ARPP19	4	0.22641	0.41856	0.999238	7413	1	5.7146	0.02466	0.07684	0.964815	1410	3	5.7146
UPK2	4	0.68239	0.77778	0.999238	13874	1	5.6849	0.024675	0.07688	0.964815	1411	3	5.6849
HYOU1	4	0.23906	0.43637	0.999238	7716	2	-0.99459	0.024684	0.076908	0.964815	1412	1	-0.99459
MAGEB18	4	0.058574	0.15394	0.989182	2756	1	4.5711	0.024691	0.076927	0.964815	1413	3	4.5711
ZMAT5	3	0.12925	0.25018	0.996369	4815	1	6.3947	0.030716	0.076947	0.964815	1709	2	6.3947
LECT2	4	0.92014	0.9204	0.999238	16593	0	3.5318	0.024702	0.076953	0.964815	1414	2	3.5318
FAM160A1	4	0.53104	0.68161	0.999238	12123	1	6.0598	0.024732	0.077034	0.964815	1416	3	6.0598
GNMT	4	0.97522	0.97546	0.999998	17573	0	3.661	0.024783	0.077185	0.964815	1417	4	3.661
FCGR2A	4	0.45186	0.61466	0.999238	10915	2	0.72104	0.024796	0.077216	0.964815	1418	2	0.72104
HPCA	3	0.20982	0.34281	0.996369	7016	1	6.4657	0.030869	0.077309	0.964815	1718	2	6.4657
ABCA3	4	0.70176	0.78535	0.999238	14040	1	2.1871	0.024852	0.077377	0.964815	1419	3	2.1871
STRN4	4	0.60673	0.74638	0.999238	13289	2	3.3165	0.024883	0.077461	0.964815	1420	2	3.3165
ODC1	4	0.10942	0.24062	0.996369	4273	2	2.3074	0.024893	0.077493	0.964815	1421	2	2.3074
ABCA13	4	0.97509	0.97533	0.999998	17571	0	3.8109	0.024906	0.077529	0.964815	1422	4	3.8109
CRNN	4	0.97508	0.97531	0.999998	17570	0	4.7831	0.024924	0.077581	0.964815	1423	4	4.7831
LRCH4	4	0.97507	0.9753	0.999998	17569	0	5.2936	0.024935	0.077609	0.964815	1424	4	5.2936
FAT2	4	0.19729	0.37645	0.996369	6695	3	-3.2762	0.024964	0.077686	0.964815	1425	1	-3.2762
EHMT1	4	0.975	0.97524	0.999998	17568	0	4.6063	0.024999	0.077777	0.964815	1426	4	4.6063
KRT37	4	0.90598	0.90628	0.999238	16332	1	5.9597	0.025002	0.077781	0.964815	1427	3	5.9597
CELA2A	4	0.85334	0.86373	0.999238	15540	1	5.6919	0.025003	0.077784	0.964815	1428	3	5.6919
HIST1H3F	4	0.14224	0.29316	0.996369	5193	3	-1.5982	0.025076	0.077983	0.964815	1429	1	-1.5982
KRT76	4	0.70912	0.78829	0.999238	14101	1	3.6754	0.025104	0.078075	0.964815	1430	2	3.6754
TMEM132D	4	0.14957	0.30455	0.996369	5391	3	-2.3437	0.025132	0.078147	0.964815	1431	1	-2.3437
MRPL13	3	0.96875	0.96898	0.999998	17462	0	4.3714	0.03125	0.078184	0.964815	1734	3	4.3714
CYHR1	4	0.97484	0.97506	0.999998	17567	0	4.3407	0.025165	0.078239	0.964815	1432	4	4.3407
COPS5	4	0.97483	0.97506	0.999998	17566	0	4.0171	0.025168	0.078248	0.964815	1433	4	4.0171
SLC11A2	4	0.37677	0.55263	0.999238	9806	2	1.7008	0.025188	0.078314	0.964815	1434	2	1.7008
SH3BP1	4	0.39866	0.57068	0.999238	10123	1	5.6725	0.025231	0.078434	0.964815	1435	3	5.6725
MRPL2	4	0.15847	0.31851	0.996369	5636	3	-2.5025	0.025244	0.07847	0.964815	1436	1	-2.5025
ACSS1	4	0.96797	0.96812	0.999998	17452	0	5.1979	0.025256	0.078499	0.964815	1437	4	5.1979
ARRB2	4	0.97474	0.97495	0.999998	17565	0	3.3106	0.025262	0.078519	0.964815	1438	4	3.3106
TMEM163	4	0.89658	0.89751	0.999238	16175	1	6.0509	0.025263	0.078521	0.964815	1439	3	6.0509
C1QL1	4	0.48697	0.64424	0.999238	11422	2	0.055213	0.0253	0.078631	0.964815	1440	2	0.055213
FAM230A	4	0.93529	0.93548	0.999238	16881	0	5.5655	0.025304	0.07865	0.964815	1441	3	5.5655
GABPB1	4	0.54248	0.69136	0.999238	12303	1	5.2579	0.025306	0.078652	0.964815	1442	3	5.2579
FAM188B	4	0.97468	0.9749	0.999998	17564	0	5.1895	0.025324	0.078704	0.964815	1443	4	5.1895
MLANA	4	0.57785	0.72149	0.999238	12832	1	5.6018	0.025346	0.078778	0.964815	1444	3	5.6018
GZMB	4	0.50525	0.6597	0.999238	11736	2	0.30075	0.025356	0.078807	0.964815	1445	2	0.30075
C10orf82	4	0.96265	0.96274	0.999998	17351	0	4.5933	0.025357	0.078809	0.964815	1446	4	4.5933
SLC19A2	4	0.92076	0.92103	0.999238	16604	0	5.8934	0.025367	0.078833	0.964815	1447	3	5.8934
SLC36A3	4	0.39935	0.57125	0.999238	10134	1	5.6071	0.025387	0.078887	0.964815	1448	3	5.6071
CYB5RL	4	0.20639	0.38991	0.996369	6929	2	0.051776	0.025412	0.078959	0.964815	1449	2	0.051776
EP400NL	4	0.83936	0.85447	0.999238	15366	1	5.7543	0.02542	0.078977	0.964815	1450	3	5.7543
CDRT1	3	0.95545	0.95576	0.999998	17231	0	6.4718	0.031614	0.078998	0.964815	1753	3	6.4718
THSD4	4	0.92779	0.9281	0.999238	16742	0	5.4532	0.025446	0.079044	0.964815	1451	3	5.4532
RAB1B	4	0.28017	0.47405	0.999238	8397	1	3.9541	0.025468	0.079107	0.964815	1452	3	3.9541
SPATA24	4	0.97453	0.97476	0.999998	17562	0	4.6547	0.025469	0.079109	0.964815	1453	4	4.6547
TBC1D22A	4	0.91561	0.91581	0.999238	16520	0	5.7201	0.025499	0.079193	0.965186	1454	3	5.7201
AUH	4	0.11877	0.25579	0.996369	4521	2	0.40604	0.025524	0.079267	0.965437	1455	2	0.40604
ENPP1	4	0.46237	0.62359	0.999238	11061	1	0.24522	0.02558	0.079413	0.966562	1456	2	0.24522
JAK1	4	0.67715	0.77573	0.999238	13831	1	5.0217	0.025636	0.079567	0.967785	1457	3	5.0217
SPSB2	4	0.44242	0.60689	0.999238	10758	2	-0.55246	0.025692	0.079733	0.968417	1458	1	-0.55246
SH3BP4	4	0.72201	0.79376	0.999238	14198	1	5.1221	0.025702	0.079752	0.968417	1459	3	5.1221
EHMT2	4	0.60116	0.74157	0.999238	13201	1	6.058	0.025743	0.079857	0.968417	1460	3	6.058
MRPL18	4	0.20668	0.39033	0.996369	6936	2	0.70811	0.025748	0.079872	0.968417	1461	2	0.70811
EGLN2	4	0.97422	0.97445	0.999998	17561	0	4.2246	0.025784	0.079965	0.968417	1462	4	4.2246
APC	4	0.46554	0.62619	0.999238	11123	2	2.3306	0.025804	0.080035	0.968417	1463	2	2.3306
RNF24	4	0.97417	0.97441	0.999998	17559	0	5.7504	0.025831	0.080115	0.968417	1464	4	5.7504
RPS27A	1	0.91991	0.92049	0.999238	16587	0	6.9158	0.080092	0.080158	0.968417	3510	1	6.9158
POLR1E	4	0.48315	0.64103	0.999238	11363	1	5.5242	0.025895	0.080289	0.968417	1465	3	5.5242
MB21D2	4	0.79234	0.82715	0.999238	14833	1	3.7317	0.025916	0.080343	0.968417	1466	3	3.7317
GSTCD	4	0.97406	0.97428	0.999998	17557	0	5.018	0.025938	0.080398	0.968417	1467	4	5.018
FRA10AC1	4	0.22373	0.41481	0.999238	7368	2	0.31874	0.025972	0.080486	0.968417	1468	2	0.31874
ZNF644	4	0.97401	0.97423	0.999998	17556	0	3.4616	0.02599	0.080535	0.968417	1469	4	3.4616
C9orf131	4	0.974	0.97422	0.999998	17555	0	3.7961	0.026001	0.080563	0.968417	1470	4	3.7961
C10orf88	4	0.91166	0.9118	0.999238	16444	0	5.8638	0.026018	0.080611	0.968417	1472	3	5.8638
SCRT1	4	0.74439	0.80357	0.999238	14387	1	0.51617	0.026028	0.080637	0.968417	1473	2	0.51617
PLAGL1	4	0.97393	0.97415	0.999998	17553	0	5.0021	0.026075	0.080772	0.968417	1474	4	5.0021
SESN2	4	0.064995	0.16539	0.995321	2928	1	3.0091	0.026084	0.080797	0.968417	1475	2	3.0091
TCTE1	4	0.88499	0.88757	0.999238	15986	1	5.8224	0.026103	0.080853	0.968417	1476	3	5.8224
GALNT1	4	0.56144	0.70758	0.999238	12562	1	5.9251	0.026114	0.080883	0.968417	1477	3	5.9251
KIAA1161	3	0.019081	0.049341	0.925513	1143	2	-3.1158	0.032457	0.080917	0.968417	1790	1	-3.1158
ATP11B	4	0.20216	0.38367	0.996369	6812	1	5.0141	0.02613	0.080929	0.968417	1478	3	5.0141
OGN	4	0.44537	0.60926	0.999238	10805	2	-0.80694	0.02614	0.080956	0.968417	1479	1	-0.80694
TFDP1	4	0.51091	0.66447	0.999238	11834	1	5.981	0.026141	0.080958	0.968417	1480	3	5.981
GDF9	4	0.96068	0.96082	0.999998	17311	0	6.0564	0.026142	0.080961	0.968417	1481	4	6.0564
FAM189B	4	0.9738	0.97403	0.999998	17552	0	5.1915	0.026201	0.081137	0.968743	1482	4	5.1915
NXNL1	4	0.9738	0.97402	0.999998	17551	0	4.5923	0.026205	0.081146	0.968743	1484	4	4.5923
KRTAP5-2	2	0.95473	0.9548	0.999998	17213	0	6.1334	0.045268	0.081164	0.968743	2393	2	6.1334
CCDC64	4	0.16563	0.32941	0.996369	5837	2	0.044881	0.026224	0.081203	0.968743	1485	2	0.044881
C7orf61	4	0.66581	0.77148	0.999238	13745	1	5.5878	0.026269	0.081327	0.969587	1486	3	5.5878
EDN3	4	0.30133	0.49123	0.999238	8678	2	1.9971	0.026308	0.081441	0.9703	1488	2	1.9971
ERCC2	4	0.50563	0.66002	0.999238	11740	1	5.621	0.02635	0.081557	0.970343	1489	3	5.621
CEACAM8	4	0.49968	0.65505	0.999238	11638	2	2.2272	0.026364	0.081595	0.970343	1490	2	2.2272
ASIP	4	0.21656	0.40465	0.997325	7190	2	2.2793	0.026419	0.081757	0.970343	1492	2	2.2793
ISOC1	4	0.79932	0.83092	0.999238	14914	1	6.1309	0.02643	0.081787	0.970343	1493	3	6.1309
WDR1	4	0.31395	0.50159	0.999238	8852	2	2.571	0.026475	0.081894	0.970343	1494	2	2.571
ETS1	4	0.89533	0.89643	0.999238	16155	1	6.2097	0.026506	0.081955	0.970343	1495	3	6.2097
NFKB1	4	0.32866	0.51346	0.999238	9089	1	5.7662	0.026513	0.081978	0.970343	1496	3	5.7662
RIBC1	4	0.97348	0.97372	0.999998	17549	0	4.5708	0.026518	0.081995	0.970343	1497	4	4.5708
PPFIA1	4	0.53505	0.68493	0.999238	12193	2	1.5295	0.026587	0.082205	0.970343	1498	2	1.5295
OR10AG1	4	0.58096	0.72423	0.999238	12885	1	5.7845	0.026598	0.082233	0.970343	1499	3	5.7845
KCNE2	4	0.9411	0.94125	0.999998	16983	0	3.8013	0.026643	0.082372	0.970343	1500	3	3.8013
LDOC1	4	0.65859	0.7688	0.999238	13685	1	6.0782	0.026673	0.082459	0.970343	1503	3	6.0782
QPCT	4	0.34731	0.52863	0.999238	9365	2	2.7526	0.026678	0.082475	0.970343	1504	2	2.7526
DENND4C	4	0.97332	0.97357	0.999998	17547	0	5.2309	0.026684	0.082496	0.970343	1505	4	5.2309
MRAP2	4	0.4039	0.57504	0.999238	10191	2	0.89573	0.026699	0.082545	0.970343	1506	2	0.89573
KIF25	4	0.97327	0.97352	0.999998	17546	0	4.3583	0.026729	0.082634	0.970343	1507	4	4.3583
BHLHB9	4	0.95506	0.95519	0.999998	17222	0	3.9597	0.02674	0.082666	0.970343	1508	4	3.9597
LAMB2	4	0.86681	0.87339	0.999238	15721	1	5.7363	0.026749	0.082685	0.970343	1509	3	5.7363
RTKN	4	0.6388	0.76177	0.999238	13554	1	4.5451	0.026755	0.0827	0.970343	1510	3	4.5451
NRG3	3	0.96672	0.96695	0.999998	17433	0	4.9849	0.03328	0.082775	0.970343	1827	3	4.9849
LRRC8A	4	0.46401	0.62495	0.999238	11095	1	5.1344	0.026811	0.082864	0.970343	1511	3	5.1344
PTP4A3	4	0.97318	0.97343	0.999998	17545	0	3.6807	0.026816	0.082877	0.970343	1512	4	3.6807
GHRL	4	0.62381	0.75663	0.999238	13472	1	6.2263	0.026865	0.082995	0.970343	1513	3	6.2263
PYY	4	0.10884	0.23968	0.996369	4255	1	3.7331	0.026867	0.083003	0.970343	1514	3	3.7331
FMR1NB	4	0.97313	0.97336	0.999998	17544	0	3.4454	0.026873	0.083021	0.970343	1515	4	3.4454
CKAP4	4	0.081814	0.19473	0.995321	3474	1	6.167	0.026886	0.083058	0.970343	1516	3	6.167
RNF222	4	0.97309	0.97333	0.999998	17543	0	5.4696	0.026915	0.083148	0.970343	1517	4	5.4696
KRT81	4	0.56669	0.71197	0.999238	12653	1	3.2906	0.026923	0.08317	0.970343	1518	3	3.2906
ACADSB	4	0.49131	0.64794	0.999238	11489	1	3.5969	0.026938	0.083211	0.970343	1519	2	3.5969
RASL10B	4	0.37451	0.55082	0.999238	9771	1	5.9422	0.026945	0.083232	0.970343	1520	3	5.9422
CNGB3	4	0.73439	0.79906	0.999238	14301	1	6.138	0.026961	0.083278	0.970343	1521	3	6.138
ZFYVE16	4	0.83768	0.85344	0.999238	15349	1	4.6378	0.02699	0.083346	0.970343	1522	3	4.6378
SFTA2	4	0.97298	0.97323	0.999998	17540	0	4.8782	0.027017	0.083425	0.970343	1523	4	4.8782
TRPC3	3	0.96643	0.96668	0.999998	17429	0	4.5723	0.033569	0.083436	0.970343	1839	3	4.5723
DHRS13	4	0.48923	0.64614	0.999238	11451	1	5.4683	0.027038	0.083478	0.970343	1524	3	5.4683
PGLYRP4	4	0.37029	0.54734	0.999238	9706	1	5.9034	0.027043	0.083499	0.970343	1525	3	5.9034
CPLX2	4	0.97295	0.9732	0.999998	17539	0	3.7262	0.027049	0.083515	0.970343	1526	4	3.7262
FOXL2	4	0.040331	0.11952	0.966908	2164	1	5.693	0.027081	0.083596	0.970343	1527	3	5.693
TMEM135	4	0.39703	0.56934	0.999238	10100	1	5.6007	0.027083	0.083601	0.970343	1528	3	5.6007
INTS4	4	0.027035	0.083471	0.943455	1557	3	-2.6564	0.027091	0.083621	0.970343	1529	1	-2.6564
PALMD	4	0.63007	0.75877	0.999238	13514	1	4.838	0.027104	0.083654	0.970343	1530	3	4.838
EVI5L	4	0.97286	0.97311	0.999998	17538	0	4.7099	0.027135	0.083742	0.970343	1531	4	4.7099
ADIRF	4	0.085624	0.20121	0.995321	3605	3	-1.9276	0.027147	0.083781	0.970343	1532	1	-1.9276
TM9SF1	4	0.97281	0.97306	0.999998	17537	0	3.979	0.027189	0.083915	0.970343	1533	4	3.979
PAQR7	4	0.81115	0.83744	0.999238	15035	1	5.5455	0.027202	0.083957	0.970343	1534	3	5.5455
2001-03-01	4	0.50973	0.66349	0.999238	11808	1	1.7024	0.027202	0.083959	0.970343	1535	2	1.7024
EFCAB2	4	0.094438	0.21605	0.996369	3845	2	0.50337	0.027286	0.084193	0.970343	1538	2	0.50337
NFIC	4	0.21815	0.40692	0.997396	7240	2	1.1039	0.027286	0.084193	0.970343	1537	2	1.1039
PRKAR1B	4	0.16563	0.32941	0.996369	5838	1	5.8001	0.027311	0.084265	0.970343	1539	3	5.8001
DDX4	4	0.82292	0.84432	0.999238	15166	1	3.4144	0.027324	0.084291	0.970343	1540	2	3.4144
CERCAM	4	0.67768	0.77593	0.999238	13834	1	1.8159	0.027355	0.084374	0.970343	1541	2	1.8159
SERPINB4	4	0.42662	0.59383	0.999238	10520	2	2.3808	0.02737	0.084413	0.970343	1542	2	2.3808
SH3GL3	4	0.022468	0.070685	0.934045	1325	2	1.7108	0.027426	0.084571	0.970343	1543	2	1.7108
SLC23A2	4	0.97256	0.9728	0.999998	17535	0	4.9568	0.027442	0.08461	0.970343	1544	4	4.9568
C5orf55	4	0.97255	0.9728	0.999998	17534	0	5.2409	0.027446	0.084616	0.970343	1545	4	5.2409
C15orf48	4	0.77487	0.81808	0.999238	14662	1	4.579	0.027482	0.08472	0.970343	1546	3	4.579
LIFR	4	0.8722	0.87746	0.999238	15800	1	5.3861	0.027488	0.084737	0.970343	1547	3	5.3861
CGA	4	0.56994	0.71473	0.999238	12713	1	5.8802	0.02751	0.084796	0.970343	1549	3	5.8802
ANXA3	4	0.96912	0.96924	0.999998	17469	0	5.7392	0.027587	0.085012	0.970343	1550	4	5.7392
ATAD1	4	0.66028	0.76943	0.999238	13701	1	5.9492	0.027609	0.08508	0.970343	1551	3	5.9492
MSMO1	4	0.97238	0.97262	0.999998	17532	0	4.6601	0.027619	0.085109	0.970343	1552	4	4.6601
SLC25A35	4	0.97235	0.97259	0.999998	17530	0	3.0415	0.027646	0.08518	0.970343	1553	4	3.0415
IL12A	4	0.37599	0.55203	0.999238	9792	2	0.3375	0.02765	0.085184	0.970343	1554	2	0.3375
BSN	4	0.27669	0.47121	0.999238	8337	1	5.5551	0.027723	0.085407	0.970343	1556	3	5.5551
LRRC40	4	0.69485	0.78261	0.999238	13977	1	5.444	0.027761	0.085534	0.970343	1557	3	5.444
TMEM141	4	0.97223	0.97246	0.999998	17529	0	4.3026	0.027774	0.085571	0.970343	1558	4	4.3026
PPIP5K2	4	0.5331	0.68333	0.999238	12161	2	3.0421	0.027786	0.085604	0.970343	1559	2	3.0421
KDM4B	4	0.9722	0.97243	0.999998	17528	0	3.6448	0.027801	0.08565	0.970343	1560	4	3.6448
GP5	4	0.97218	0.97241	0.999998	17527	0	4.4595	0.027821	0.085697	0.970343	1561	4	4.4595
IFT88	4	0.28229	0.47577	0.999238	8431	1	6.0883	0.027842	0.085757	0.970343	1562	3	6.0883
ST3GAL6	4	0.97215	0.97239	0.999998	17526	0	5.1321	0.027848	0.085773	0.970343	1563	4	5.1321
NIPA1	4	0.97214	0.97238	0.999998	17525	0	4.3426	0.027856	0.085795	0.970343	1564	4	4.3426
KSR2	4	0.97213	0.97236	0.999998	17524	0	4.0603	0.027873	0.085847	0.970343	1565	4	4.0603
FYB	4	0.42643	0.59369	0.999238	10517	1	5.5182	0.027875	0.085853	0.970343	1566	3	5.5182
ZFYVE27	4	0.84553	0.85843	0.999238	15447	1	5.4838	0.027886	0.085878	0.970343	1567	3	5.4838
APLP1	4	0.34183	0.52416	0.999238	9282	2	-0.70754	0.027901	0.085915	0.970343	1568	1	-0.70754
ACTL6B	4	0.49812	0.65371	0.999238	11614	2	-0.14753	0.027901	0.085915	0.970343	1569	2	-0.14753
BHLHA9	4	0.2453	0.44498	0.999238	7872	1	4.908	0.027934	0.086004	0.970343	1570	3	4.908
MTFP1	4	0.91825	0.91841	0.999238	16569	0	6.0578	0.027966	0.086083	0.970343	1571	3	6.0578
RSU1	4	0.39749	0.56972	0.999238	10109	1	1.9908	0.027985	0.086137	0.970343	1572	3	1.9908
HIST1H3I	4	0.17809	0.34819	0.996369	6163	2	2.7357	0.027987	0.086147	0.970343	1573	2	2.7357
BRD9	4	0.97199	0.97221	0.999998	17522	0	5.6117	0.028012	0.08622	0.970343	1574	4	5.6117
HS3ST5	4	0.97197	0.9722	0.999998	17521	0	4.9987	0.028028	0.086266	0.970343	1575	4	4.9987
GRXCR1	4	0.66919	0.77273	0.999238	13766	1	5.1879	0.028029	0.086267	0.970343	1576	3	5.1879
NCAPH	4	0.20348	0.3856	0.996369	6850	3	-3.783	0.028041	0.086293	0.970343	1577	1	-3.783
ZBTB2	4	0.95357	0.95372	0.999998	17193	0	4.9132	0.028062	0.086345	0.970343	1578	4	4.9132
OR5M8	4	0.97192	0.97215	0.999998	17520	0	5.0584	0.028078	0.086399	0.970343	1579	4	5.0584
ASB12	3	0.9651	0.96531	0.999998	17410	0	4.6359	0.034905	0.086461	0.970343	1909	3	4.6359
DECR2	4	0.97186	0.97209	0.999998	17519	0	3.8916	0.028137	0.086562	0.970343	1580	4	3.8916
DNAH11	4	0.7987	0.83059	0.999238	14907	1	6.0432	0.028171	0.086655	0.970343	1581	3	6.0432
SPANXN3	3	0.22388	0.35842	0.996369	7373	1	6.4162	0.035035	0.086748	0.970343	1920	2	6.4162
H2AFJ	4	0.97179	0.97201	0.999998	17518	0	4.6582	0.028206	0.086749	0.970343	1583	4	4.6582
ART5	4	0.14242	0.29343	0.996369	5198	1	3.8352	0.028208	0.086755	0.970343	1584	3	3.8352
CYP4A22	1	0.91319	0.9137	0.999238	16485	0	6.776	0.086813	0.086762	0.970343	3698	1	6.776
EME2	4	0.0037249	0.013034	0.853311	264	2	1.6388	0.028231	0.08681	0.970343	1585	2	1.6388
UST	4	0.97177	0.97198	0.999998	17517	0	5.3669	0.028231	0.08681	0.970343	1586	4	5.3669
PLSCR1	4	0.14389	0.29573	0.996369	5250	1	5.5171	0.028252	0.086866	0.970343	1587	3	5.5171
INPP4A	4	0.021013	0.066589	0.931109	1251	2	0.70837	0.028264	0.086905	0.970343	1588	2	0.70837
JHDM1D	4	0.65047	0.76594	0.999238	13627	1	5.5179	0.028266	0.086912	0.970343	1589	3	5.5179
RGS2	4	0.97172	0.97192	0.999998	17516	0	4.173	0.028283	0.086958	0.970343	1590	4	4.173
CIDEA	4	0.16325	0.32579	0.996369	5771	2	2.3909	0.028295	0.086988	0.970343	1592	2	2.3909
WFDC12	4	0.95876	0.95891	0.999998	17274	0	5.4234	0.028295	0.086988	0.970343	1591	4	5.4234
C19orf33	4	0.38823	0.56202	0.999238	9974	2	2.7532	0.028316	0.087044	0.970343	1593	2	2.7532
LDLRAD4	4	0.65823	0.76866	0.999238	13680	1	2.3394	0.02832	0.087058	0.970343	1594	3	2.3394
PRCD	4	0.50268	0.65757	0.999238	11692	2	3.1766	0.028369	0.087198	0.970343	1595	2	3.1766
SEZ6L2	4	0.2383	0.43529	0.999238	7701	2	1.6306	0.028376	0.087216	0.970343	1596	2	1.6306
SLC51B	4	0.96624	0.96639	0.999998	17427	0	5.5666	0.028379	0.087227	0.970343	1597	4	5.5666
ZNF66	1	0.9127	0.9132	0.999238	16469	0	6.7823	0.087298	0.087261	0.970343	3717	1	6.7823
NDUFS3	4	0.91607	0.91628	0.999238	16535	0	5.4395	0.028429	0.087371	0.970343	1598	3	5.4395
VTN	4	0.048413	0.13573	0.980452	2433	2	-2.1236	0.028432	0.08738	0.970343	1599	2	-2.1236
TMCO3	4	0.078448	0.18883	0.995321	3369	3	-2.0469	0.028488	0.087517	0.970343	1600	1	-2.0469
GSTA3	1	0.91243	0.91291	0.999238	16465	0	6.76	0.087569	0.087523	0.970343	3726	1	6.76
OR10G7	4	0.97151	0.97172	0.999998	17514	0	4.3682	0.028492	0.087528	0.970343	1601	4	4.3682
MBTPS2	3	0.9505	0.95074	0.999998	17150	0	5.9325	0.035385	0.087573	0.970343	1934	3	5.9325
ZFP64	4	0.9714	0.97161	0.999998	17513	0	5.2861	0.028599	0.08783	0.970387	1602	4	5.2861
PCDH10	4	0.89619	0.89718	0.999238	16168	1	3.984	0.0286	0.087832	0.970387	1603	3	3.984
UBR2	4	0.069501	0.17325	0.995321	3068	3	-2.4135	0.028655	0.087979	0.970387	1605	1	-2.4135
FANCL	4	0.95813	0.95829	0.999998	17265	0	6.1532	0.028655	0.087979	0.970387	1604	4	6.1532
C1orf145	1	0.91187	0.91234	0.999238	16452	0	6.8723	0.088126	0.088091	0.970387	3743	1	6.8723
CDC42SE2	4	0.52251	0.67442	0.999238	12000	2	1.4473	0.028711	0.08814	0.970387	1608	2	1.4473
RPH3AL	4	0.97127	0.97146	0.999998	17511	0	5.0142	0.02873	0.088193	0.970387	1609	4	5.0142
PPP1R14C	4	0.54456	0.69312	0.999238	12331	1	4.2938	0.028764	0.088296	0.970387	1610	3	4.2938
CEP63	4	0.21956	0.40887	0.997867	7271	2	2.3112	0.028767	0.088303	0.970387	1611	2	2.3112
NEK9	4	0.97123	0.97142	0.999998	17510	0	5.1807	0.02877	0.088314	0.970387	1612	4	5.1807
MAT2B	4	0.97115	0.97134	0.999998	17508	0	4.1183	0.02885	0.08855	0.970387	1613	4	4.1183
UBE2J2	4	0.97113	0.97132	0.999998	17507	0	4.1049	0.028874	0.088617	0.970387	1614	4	4.1049
NEUROD2	4	0.086517	0.20276	0.995964	3629	1	4.9749	0.028877	0.088622	0.970387	1615	3	4.9749
MAGEA8	4	0.10123	0.22711	0.996369	4046	1	1.6345	0.028879	0.088626	0.970387	1616	2	1.6345
NDN	4	0.90854	0.90875	0.999238	16385	1	5.5068	0.028916	0.088737	0.970387	1617	3	5.5068
CLUL1	4	0.54312	0.69191	0.999238	12306	2	2.2063	0.028935	0.088789	0.970387	1618	2	2.2063
OR9G4	4	0.97106	0.97125	0.999998	17506	0	3.7475	0.028938	0.088797	0.970387	1619	4	3.7475
SNAI2	4	0.97105	0.97124	0.999998	17505	0	3.9078	0.028946	0.08882	0.970387	1620	4	3.9078
ASTE1	4	0.87765	0.88167	0.999238	15884	1	5.8995	0.028968	0.088886	0.970387	1621	3	5.8995
FAM185A	3	0.32077	0.46598	0.999238	8968	2	-1.1397	0.036012	0.088988	0.970387	1963	1	-1.1397
KIF23	4	0.19748	0.37672	0.996369	6702	1	5.3826	0.029059	0.089134	0.970387	1622	3	5.3826
RHOBTB1	4	0.7672	0.81431	0.999238	14578	1	4.8325	0.029076	0.089192	0.970387	1623	3	4.8325
PTPN2	4	0.57446	0.71853	0.999238	12780	1	4.3907	0.029102	0.089263	0.970387	1624	3	4.3907
PAOX	4	0.9709	0.97107	0.999998	17504	0	4.8297	0.029102	0.089264	0.970387	1625	4	4.8297
A4GALT	4	0.97086	0.97103	0.999998	17503	0	4.9898	0.029138	0.089374	0.970387	1626	4	4.9898
PNMA5	4	0.5844	0.7272	0.999238	12922	1	5.428	0.029145	0.089391	0.970387	1627	3	5.428
CASP1	4	0.16249	0.32463	0.996369	5743	2	2.3452	0.029151	0.089413	0.970387	1628	2	2.3452
GALNT10	4	0.36851	0.54589	0.999238	9684	2	2.654	0.029158	0.089436	0.970387	1629	2	2.654
SFTPD	4	0.15682	0.31589	0.996369	5587	2	1.2929	0.029214	0.089587	0.970387	1630	2	1.2929
SPEN	4	0.66581	0.77148	0.999238	13744	1	5.4277	0.02923	0.089633	0.970387	1631	3	5.4277
ACTL7A	4	0.073837	0.18083	0.995321	3206	2	2.2969	0.029237	0.089655	0.970387	1632	2	2.2969
C9orf53	4	0.52101	0.67314	0.999238	11979	1	5.4959	0.029242	0.089663	0.970387	1633	3	5.4959
ZFPM1	4	0.81497	0.83964	0.999238	15079	1	3.3982	0.029291	0.08979	0.970387	1634	2	3.3982
TMEM88B	4	0.14611	0.29915	0.996369	5304	2	0.48111	0.029297	0.089812	0.970387	1635	2	0.48111
ARID1B	4	0.97068	0.97085	0.999998	17501	0	4.8716	0.029316	0.089864	0.970387	1636	4	4.8716
PROSER2	4	0.62452	0.75689	0.999238	13479	1	5.4417	0.029362	0.089997	0.970387	1637	3	5.4417
RLN2	4	0.93118	0.93145	0.999238	16815	0	5.3545	0.029381	0.090046	0.970387	1638	3	5.3545
DDA1	4	0.95182	0.952	0.999998	17167	0	5.5812	0.029388	0.090068	0.970387	1639	4	5.5812
SLC7A3	4	0.2106	0.39611	0.996369	7040	2	2.3826	0.029399	0.090091	0.970387	1640	2	2.3826
F2RL3	4	0.92076	0.92103	0.999238	16616	0	4.2939	0.029437	0.090211	0.970387	1641	3	4.2939
RAB4A	4	0.85766	0.86676	0.999238	15609	1	1.1187	0.029493	0.090379	0.970387	1642	3	1.1187
LRRC39	4	0.97047	0.97062	0.999998	17500	0	4.8353	0.029527	0.090471	0.970387	1643	4	4.8353
NDNF	4	0.26591	0.46259	0.999238	8194	2	3.0913	0.02954	0.090504	0.970387	1644	2	3.0913
DIS3L2	4	0.94196	0.94214	0.999998	16999	0	4.3953	0.029577	0.090614	0.970387	1646	3	4.3953
PRRG1	4	0.97036	0.97051	0.999998	17499	0	5.0399	0.029637	0.090772	0.970387	1647	4	5.0399
SLC26A8	4	0.019992	0.063691	0.931109	1199	3	-2.7751	0.02966	0.090841	0.970387	1648	1	-2.7751
NKX6-2	4	0.35409	0.53419	0.999238	9479	2	2.2293	0.029716	0.090982	0.970387	1649	2	2.2293
ZDHHC14	4	0.97023	0.97038	0.999998	17498	0	3.4728	0.029768	0.091149	0.970387	1651	4	3.4728
ESCO2	4	0.79405	0.82806	0.999238	14849	1	4.2453	0.029768	0.091152	0.970387	1652	3	4.2453
HMCES	4	0.6197	0.75524	0.999238	13443	1	3.3517	0.029772	0.091159	0.970387	1653	3	3.3517
MCM9	4	0.50233	0.65729	0.999238	11685	1	5.4051	0.029772	0.09116	0.970387	1654	3	5.4051
KIAA1045	4	0.97022	0.97037	0.999998	17497	0	4.9167	0.02978	0.091186	0.970387	1655	4	4.9167
CHM	4	0.68109	0.77727	0.999238	13860	1	5.3456	0.029801	0.091241	0.970387	1656	3	5.3456
C4orf46	4	0.23771	0.43451	0.999238	7689	1	3.4981	0.029822	0.0913	0.970387	1657	2	3.4981
USP32	4	0.97016	0.97031	0.999998	17495	0	4.3177	0.029837	0.091334	0.970387	1658	4	4.3177
CDK5	4	0.84197	0.85612	0.999238	15399	1	4.3515	0.029853	0.091377	0.970387	1659	3	4.3515
LRRC46	4	0.51226	0.66566	0.999238	11855	2	3.0265	0.029855	0.091381	0.970387	1660	2	3.0265
SMARCB1	4	0.50283	0.6577	0.999238	11696	2	3.0014	0.029877	0.091433	0.970387	1661	2	3.0014
ZER1	4	0.97008	0.97023	0.999998	17493	0	4.7925	0.029915	0.091538	0.970387	1662	4	4.7925
ALDH6A1	4	0.54858	0.69656	0.999238	12387	2	0.64219	0.029939	0.091604	0.970387	1663	2	0.64219
GIMAP4	4	0.97006	0.97021	0.999998	17492	0	5.7017	0.029944	0.091612	0.970387	1664	4	5.7017
CPSF6	3	0.96281	0.96307	0.999998	17356	0	4.1304	0.037193	0.091637	0.970387	2026	3	4.1304
LRIF1	4	0.5797	0.72314	0.999238	12866	2	2.2485	0.029995	0.091769	0.970387	1665	2	2.2485
CASP5	4	0.97	0.97015	0.999998	17489	0	4.8112	0.029997	0.091775	0.970387	1666	4	4.8112
CCNB2	4	0.52973	0.68053	0.999238	12101	1	5.9926	0.029999	0.091779	0.970387	1667	3	5.9926
LCMT1	4	0.96998	0.97012	0.999998	17487	0	3.3123	0.030022	0.091847	0.970387	1669	4	3.3123
GNPDA1	4	0.72321	0.79429	0.999238	14208	1	5.3005	0.030062	0.091968	0.970387	1670	3	5.3005
CCSER1	4	0.89908	0.89976	0.999238	16229	1	5.5912	0.030074	0.091992	0.970387	1671	3	5.5912
KIAA1755	4	0.9699	0.97002	0.999998	17486	0	4.0821	0.0301	0.09207	0.970387	1672	4	4.0821
KLHDC7A	4	0.59883	0.7395	0.999238	13153	2	1.337	0.030107	0.092088	0.970387	1673	2	1.337
SORT1	4	0.35206	0.53253	0.999238	9440	2	2.5352	0.030117	0.092117	0.970387	1674	2	2.5352
ANGPTL5	4	0.4944	0.65057	0.999238	11544	1	4.8511	0.030121	0.092126	0.970387	1675	3	4.8511
GGT7	4	0.96984	0.96996	0.999998	17485	0	3.9257	0.030158	0.092235	0.970387	1676	4	3.9257
SMC3	4	0.24258	0.44121	0.999238	7813	2	-1.0591	0.030162	0.09225	0.970387	1677	2	-1.0591
SRL	3	0.0632	0.14797	0.986723	2885	1	6.4132	0.037542	0.09243	0.970387	2037	2	6.4132
PRKD1	3	0.79682	0.7997	0.999238	14887	1	6.3014	0.03756	0.092465	0.970387	2039	2	6.3014
ZBED6	4	0.88158	0.88479	0.999238	15946	1	5.5356	0.030244	0.092476	0.970387	1679	3	5.5356
PALLD	4	0.48886	0.64584	0.999238	11448	2	2.9046	0.030248	0.092483	0.970387	1680	2	2.9046
ZNF346	4	0.87508	0.87967	0.999238	15839	1	5.76	0.03025	0.092484	0.970387	1681	3	5.76
SPATS1	4	0.96975	0.96986	0.999998	17484	0	4.4435	0.030253	0.092499	0.970387	1682	4	4.4435
IL22	4	0.2434	0.44234	0.999238	7826	3	-1.0507	0.030274	0.092551	0.970387	1683	1	-1.0507
C21orf54	4	0.96972	0.96984	0.999998	17483	0	5.4485	0.030282	0.092571	0.970387	1684	4	5.4485
CDC5L	4	0.96969	0.96982	0.999998	17480	0	4.0302	0.030307	0.092641	0.970387	1685	4	4.0302
ITGA6	4	0.2577	0.45589	0.999238	8077	1	2.9226	0.03033	0.09271	0.970387	1686	2	2.9226
TRPV1	4	0.96296	0.96306	0.999998	17358	0	4.9048	0.030336	0.092728	0.970387	1687	4	4.9048
GLB1	4	0.96966	0.96979	0.999998	17479	0	4.8895	0.03034	0.092741	0.970387	1688	4	4.8895
MTMR8	4	0.84834	0.86034	0.999238	15476	1	3.5872	0.030343	0.09275	0.970387	1689	3	3.5872
ERC1	4	0.96963	0.96976	0.999998	17478	0	4.4983	0.030365	0.092811	0.970387	1690	4	4.4983
VAT1L	4	0.62807	0.75807	0.999238	13502	1	5.6837	0.030379	0.092844	0.970387	1691	3	5.6837
HIST3H3	4	0.96962	0.96974	0.999998	17477	0	3.4401	0.030382	0.092852	0.970387	1692	4	3.4401
H1F0	4	0.71837	0.79221	0.999238	14171	1	5.8188	0.030386	0.092866	0.970387	1693	3	5.8188
CNKSR1	3	0.89861	0.89868	0.999238	16219	0	6.3785	0.037745	0.092884	0.970387	2049	3	6.3785
ACP5	4	0.96958	0.96971	0.999998	17475	0	4.3024	0.030419	0.092952	0.970387	1694	4	4.3024
PATE4	4	0.96953	0.96966	0.999998	17474	0	4.462	0.030469	0.093087	0.970387	1695	4	4.462
MCMDC2	4	0.2602	0.45793	0.999238	8111	2	-1.0874	0.030497	0.093162	0.970387	1696	1	-1.0874
OTX1	4	0.96949	0.96962	0.999998	17473	0	3.3613	0.030515	0.093217	0.970387	1697	4	3.3613
LPXN	4	0.74752	0.80503	0.999238	14417	1	5.6817	0.030531	0.093261	0.970387	1698	3	5.6817
ZIC4	4	0.93118	0.93145	0.999238	16814	0	5.3152	0.030537	0.093277	0.970387	1699	3	5.3152
OR2T1	4	0.24377	0.44287	0.999238	7837	1	4.0043	0.030553	0.093317	0.970387	1700	3	4.0043
OR4D9	4	0.46818	0.62841	0.999238	11152	1	4.2481	0.030589	0.093416	0.970387	1701	3	4.2481
DMBX1	4	0.96941	0.96954	0.999998	17471	0	3.3873	0.03059	0.093422	0.970387	1702	4	3.3873
PVRL4	4	0.029763	0.091127	0.960774	1659	2	1.4524	0.030609	0.09348	0.970387	1703	2	1.4524
SLC7A7	4	0.96938	0.96951	0.999998	17470	0	2.984	0.030623	0.093518	0.970387	1704	4	2.984
SF3B2	4	0.37303	0.54962	0.999238	9746	2	1.5708	0.030664	0.093641	0.970387	1705	2	1.5708
CPOX	4	0.062033	0.16007	0.995321	2849	2	2.3127	0.030677	0.093677	0.970387	1706	2	2.3127
IFNK	4	0.90839	0.9086	0.999238	16380	1	4.2956	0.030699	0.093746	0.970387	1707	3	4.2956
WDR86	4	0.034645	0.10444	0.966908	1875	1	6.1691	0.030708	0.093762	0.970387	1708	3	6.1691
FAM102A	4	0.36413	0.54234	0.999238	9628	2	1.639	0.03072	0.093793	0.970387	1710	2	1.639
CYP2A7	1	0.90618	0.90671	0.999238	16336	0	6.7632	0.09382	0.093804	0.970387	3896	1	6.7632
TMEM51	4	0.95424	0.95438	0.999998	17203	0	5.5228	0.030738	0.093841	0.970387	1711	4	5.5228
HADHA	4	0.32354	0.50926	0.999238	9008	2	2.5943	0.030743	0.093852	0.970387	1712	2	2.5943
FYN	4	0.65894	0.76892	0.999238	13690	1	5.7519	0.030797	0.093982	0.970387	1713	3	5.7519
JUP	4	0.092369	0.21262	0.996369	3783	1	5.9359	0.030803	0.093995	0.970387	1714	3	5.9359
ZNF225	4	0.71778	0.79196	0.999238	14164	1	3.3758	0.03082	0.094035	0.970387	1715	2	3.3758
AKAP5	4	0.73693	0.80016	0.999238	14328	1	5.4232	0.03085	0.094118	0.970387	1716	3	5.4232
UVRAG	4	0.26089	0.4585	0.999238	8127	1	5.5131	0.030868	0.094172	0.970387	1717	3	5.5131
DDX31	3	0.38776	0.53829	0.999238	9971	1	6.2653	0.038339	0.094217	0.970387	2075	2	6.2653
SLC35A2	4	0.39292	0.56592	0.999238	10030	2	1.9792	0.030887	0.09422	0.970387	1719	2	1.9792
ZBTB7C	4	0.96911	0.96924	0.999998	17468	0	4.0769	0.030887	0.09422	0.970387	1720	4	4.0769
GPR64	4	0.94965	0.94983	0.999998	17138	0	5.7977	0.030898	0.094249	0.970387	1721	4	5.7977
MAPK10	4	0.18822	0.36326	0.996369	6448	2	1.2113	0.030943	0.0944	0.970387	1722	2	1.2113
TANC2	4	0.96902	0.96915	0.999998	17467	0	3.737	0.03098	0.094505	0.970387	1723	4	3.737
SLC39A1	4	0.040205	0.11919	0.966908	2159	3	-3.7134	0.030999	0.094557	0.970387	1724	1	-3.7134
TNK2	4	0.96894	0.96907	0.999998	17466	0	3.9688	0.031056	0.094709	0.970387	1725	4	3.9688
DNAH6	4	0.96894	0.96907	0.999998	17465	0	4.4957	0.031064	0.094728	0.970387	1726	4	4.4957
PRH2	4	0.96893	0.96907	0.999998	17464	0	4.8993	0.031069	0.094741	0.970387	1727	4	4.8993
SLC9B2	4	0.65859	0.7688	0.999238	13684	1	5.3573	0.03107	0.094744	0.970387	1728	3	5.3573
PAPSS1	4	0.20594	0.38924	0.996369	6916	1	5.6817	0.0311	0.09483	0.970387	1729	3	5.6817
PARP10	4	0.74404	0.80342	0.999238	14385	1	5.3181	0.031117	0.094874	0.970387	1730	3	5.3181
HIP1R	4	0.79771	0.83004	0.999238	14897	1	5.5644	0.031207	0.095108	0.970387	1731	3	5.5644
TMLHE	4	0.37309	0.54966	0.999238	9752	1	4.7135	0.031222	0.095155	0.970387	1732	3	4.7135
DLX3	4	0.53267	0.683	0.999238	12151	1	5.6029	0.031231	0.095178	0.970387	1733	3	5.6029
ZP2	4	0.96872	0.96887	0.999998	17461	0	5.0545	0.03128	0.095315	0.970387	1735	4	5.0545
RGS7BP	4	0.51729	0.66992	0.999238	11931	1	4.7809	0.031297	0.095349	0.970387	1736	3	4.7809
ASTN2	4	0.96869	0.96884	0.999998	17460	0	4.4255	0.03131	0.095379	0.970387	1737	4	4.4255
C3orf14	4	0.93387	0.93403	0.999238	16852	0	5.2387	0.03132	0.095406	0.970387	1738	3	5.2387
IL19	4	0.55208	0.6995	0.999238	12437	2	3.078	0.031352	0.0955	0.970387	1739	2	3.078
B3GNT6	4	0.13781	0.2862	0.996369	5045	3	-1.9844	0.031389	0.095593	0.970387	1740	1	-1.9844
PCDHGA6	4	0.96859	0.96875	0.999998	17459	0	3.7138	0.031412	0.095658	0.970387	1741	4	3.7138
PPP2CB	4	0.94345	0.94366	0.999998	17023	0	5.2705	0.031434	0.095718	0.970387	1742	3	5.2705
OSBPL7	4	0.11672	0.25245	0.996369	4470	2	0.2757	0.031445	0.095744	0.970387	1743	2	0.2757
WFIKKN1	4	0.48357	0.64138	0.999238	11368	2	2.9145	0.031475	0.095824	0.970387	1744	2	2.9145
CTSB	4	0.9685	0.96866	0.999998	17458	0	3.9976	0.031498	0.095888	0.970387	1745	4	3.9976
DPM1	4	0.34246	0.52468	0.999238	9293	1	5.0389	0.031501	0.095892	0.970387	1746	3	5.0389
TEX2	4	0.14116	0.29149	0.996369	5156	2	2.2143	0.031508	0.095919	0.970387	1747	2	2.2143
MECR	4	0.45596	0.61817	0.999238	10979	1	5.3702	0.031512	0.09593	0.970387	1748	3	5.3702
PHACTR4	4	0.96848	0.96864	0.999998	17457	0	4.1224	0.031517	0.095946	0.970387	1749	4	4.1224
USP53	4	0.20132	0.38245	0.996369	6793	1	5.5165	0.031566	0.096071	0.970387	1750	3	5.5165
EMP3	4	0.56876	0.71373	0.999238	12694	1	1.8565	0.031575	0.096095	0.970387	1751	2	1.8565
RTN4RL1	4	0.26221	0.45959	0.999238	8145	2	1.8357	0.031584	0.096119	0.970387	1752	2	1.8357
CST9L	3	0.9608	0.96109	0.999998	17314	0	3.9889	0.039203	0.096187	0.970387	2112	3	3.9889
COBLL1	4	0.96836	0.96851	0.999998	17455	0	4.2287	0.031643	0.09626	0.970387	1754	4	4.2287
ZNF469	4	0.19104	0.36745	0.996369	6531	2	1.2145	0.031668	0.096327	0.970387	1755	2	1.2145
ATP6V0D2	4	0.96828	0.96842	0.999998	17454	0	3.2999	0.03172	0.09646	0.970387	1756	4	3.2999
ELMOD2	4	0.83028	0.84884	0.999238	15258	1	2.9506	0.031723	0.096466	0.970387	1757	2	2.9506
UNC79	4	0.52632	0.67766	0.999238	12056	1	5.371	0.031753	0.09654	0.970387	1758	3	5.371
CHRNA7	4	0.58239	0.72545	0.999238	12897	1	3.3388	0.031765	0.096575	0.970387	1759	2	3.3388
C5orf30	4	0.068437	0.17142	0.995321	3030	2	2.2022	0.031777	0.096601	0.970387	1760	2	2.2022
C9orf41	3	0.35974	0.50836	0.999238	9568	1	5.1441	0.039392	0.096605	0.970387	2125	2	5.1441
TMEM30A	4	0.08274	0.19628	0.995321	3507	3	-1.9697	0.031779	0.096609	0.970387	1761	1	-1.9697
PCBD1	4	0.75579	0.80889	0.999238	14486	1	4.956	0.031788	0.096637	0.970387	1762	3	4.956
DBI	4	0.90381	0.90423	0.999238	16297	1	4.6385	0.031799	0.096656	0.970387	1763	3	4.6385
PRRT1	3	0.85064	0.85054	0.999238	15508	0	4.1727	0.039434	0.096703	0.970387	2128	2	4.1727
ITPK1	4	0.96815	0.9683	0.999998	17453	0	3.9891	0.031849	0.096791	0.970387	1764	4	3.9891
CDADC1	4	0.13558	0.28267	0.996369	4989	2	2.5619	0.031855	0.096806	0.970387	1765	2	2.5619
C5orf45	4	0.035344	0.10637	0.966908	1916	3	-2.2719	0.031891	0.096905	0.970387	1766	1	-2.2719
KRTAP21-1	2	0.94533	0.94524	0.999998	17060	0	5.2221	0.054674	0.096926	0.970387	2749	2	5.2221
RAP1B	1	0.903	0.90353	0.999238	16289	0	6.5951	0.097002	0.096984	0.970387	3990	1	6.5951
OLFML3	4	0.50563	0.66002	0.999238	11744	1	3.1377	0.031946	0.097062	0.970387	1767	3	3.1377
ELF1	4	0.73605	0.79976	0.999238	14319	1	5.1221	0.032002	0.097216	0.970387	1768	3	5.1221
C4orf40	4	0.51008	0.66378	0.999238	11814	2	2.9689	0.032023	0.097273	0.970387	1769	2	2.9689
DGKA	4	0.94223	0.94241	0.999998	17002	0	6.0839	0.032025	0.097277	0.970387	1770	3	6.0839
OR5B17	4	0.96794	0.96809	0.999998	17450	0	3.247	0.032056	0.097361	0.970387	1771	4	3.247
PPFIBP2	4	0.33139	0.51566	0.999238	9134	2	0.31847	0.032058	0.097368	0.970387	1772	2	0.31847
IDH3B	3	0.73404	0.75043	0.999238	14298	1	6.2915	0.039756	0.097445	0.970387	2143	2	6.2915
SPATA2L	4	0.07643	0.18536	0.995321	3295	3	-2.1226	0.032113	0.097524	0.970387	1773	1	-2.1226
LEPRE1	4	0.61923	0.75508	0.999238	13439	1	5.3467	0.032124	0.097556	0.970387	1775	3	5.3467
GBP5	4	0.73877	0.80099	0.999238	14345	1	5.4527	0.032146	0.097625	0.970387	1776	3	5.4527
XPO5	3	0.17106	0.29853	0.996369	5983	1	6.2351	0.039892	0.097735	0.970387	2150	2	6.2351
OR51I2	4	0.91385	0.91401	0.999238	16501	0	5.4561	0.032189	0.097746	0.970387	1777	3	5.4561
LRRK2	4	0.1917	0.36844	0.996369	6559	2	-0.61907	0.032225	0.097854	0.970387	1778	1	-0.61907
DRC1	4	0.79905	0.83078	0.999238	14911	1	5.4721	0.032237	0.097894	0.970387	1779	3	5.4721
SCUBE2	4	0.96775	0.96789	0.999998	17448	0	2.9321	0.032251	0.097936	0.970387	1780	4	2.9321
C9orf16	4	0.18031	0.35153	0.996369	6230	2	2.3002	0.032282	0.09803	0.970387	1781	2	2.3002
C2orf81	4	0.17253	0.33987	0.996369	6019	1	3.6295	0.032305	0.098101	0.970387	1782	2	3.6295
WDHD1	4	0.96769	0.96782	0.999998	17447	0	2.6418	0.032312	0.098122	0.970387	1783	4	2.6418
C1orf43	4	0.38268	0.55744	0.999238	9899	2	2.5611	0.032336	0.09819	0.970387	1784	2	2.5611
C1orf115	4	0.93407	0.93425	0.999238	16857	0	5.5212	0.032384	0.098302	0.970387	1785	3	5.5212
HOXD4	4	0.96761	0.96774	0.999998	17446	0	2.9455	0.03239	0.098317	0.970387	1786	4	2.9455
DEF6	4	0.96755	0.96767	0.999998	17443	0	4.9254	0.032392	0.098322	0.970387	1787	4	4.9254
PWWP2A	4	0.9676	0.96773	0.999998	17445	0	4.0517	0.032399	0.098342	0.970387	1788	4	4.0517
MYO1E	4	0.88101	0.88431	0.999238	15938	1	5.3281	0.03242	0.098388	0.970387	1789	3	5.3281
KARS	4	0.35522	0.53508	0.999238	9499	1	5.1161	0.032463	0.098498	0.970387	1791	3	5.1161
AKAP11	4	0.21593	0.40373	0.997325	7175	2	0.51058	0.032503	0.098603	0.970387	1792	2	0.51058
SLC5A11	4	0.11815	0.25479	0.996369	4498	1	4.8706	0.032564	0.098774	0.970387	1793	3	4.8706
MKI67IP	3	0.66637	0.70512	0.999238	13749	1	-0.18248	0.040371	0.09882	0.970387	2169	1	-0.18248
C5orf24	4	0.92877	0.92905	0.999238	16760	0	5.4243	0.03264	0.098975	0.970387	1794	3	5.4243
ARPC3	4	0.7686	0.81501	0.999238	14594	1	5.5994	0.032659	0.099033	0.970387	1795	3	5.5994
TIPIN	4	0.31722	0.50423	0.999238	8909	2	-2.1573	0.03267	0.099062	0.970387	1796	1	-2.1573
UHRF1BP1L	4	0.0051558	0.017787	0.870736	361	1	5.6635	0.032689	0.099106	0.970387	1797	3	5.6635
TMPPE	3	0.66008	0.70124	0.999238	13699	1	6.3855	0.040501	0.099122	0.970387	2176	2	6.3855
CYP26A1	4	0.96729	0.96741	0.999998	17442	0	4.457	0.032705	0.099158	0.970387	1798	4	4.457
TNFRSF19	4	0.96728	0.96739	0.999998	17441	0	3.4787	0.032723	0.099217	0.970387	1799	4	3.4787
CXCL12	4	0.0063162	0.021607	0.870736	433	2	0.68715	0.032726	0.099225	0.970387	1800	2	0.68715
CCDC120	4	0.71281	0.78984	0.999238	14125	1	5.6672	0.032733	0.09924	0.970387	1801	3	5.6672
TRIML1	4	0.96726	0.96737	0.999998	17440	0	4.2519	0.03274	0.099256	0.970387	1802	4	4.2519
TMEM196	4	0.39653	0.56894	0.999238	10092	2	2.7455	0.032746	0.099268	0.970387	1803	2	2.7455
UNC119B	4	0.16958	0.33539	0.996369	5938	2	2.1853	0.032768	0.099333	0.970387	1804	2	2.1853
TTC38	4	0.78937	0.82559	0.999238	14792	1	6.0662	0.03278	0.099361	0.970387	1805	3	6.0662
VPS26A	4	0.52535	0.67687	0.999238	12040	1	2.3393	0.032782	0.099364	0.970387	1806	3	2.3393
OR1S2	2	0.53754	0.55561	0.999238	12221	1	3.4058	0.056169	0.099433	0.970387	2798	1	3.4058
POU3F3	4	0.96717	0.96729	0.999998	17439	0	4.7894	0.032835	0.099501	0.970387	1807	4	4.7894
CDC73	4	0.81597	0.84023	0.999238	15091	1	5.4899	0.032856	0.099555	0.970387	1808	3	5.4899
COL4A3	4	0.79163	0.82676	0.999238	14823	1	5.5998	0.032868	0.099591	0.970387	1809	3	5.5998
OR5T3	3	0.0010503	0.0030457	0.813301	73	2	-3.9554	0.040725	0.09961	0.970387	2187	1	-3.9554
TPRX1	4	0.96709	0.96722	0.999998	17438	0	5.3744	0.032912	0.099722	0.970387	1810	4	5.3744
TCEAL1	4	0.59769	0.7385	0.999238	13132	2	1.2888	0.032916	0.099735	0.970387	1811	2	1.2888
VAMP2	4	0.65236	0.76662	0.999238	13641	1	5.3928	0.032942	0.09982	0.970387	1812	3	5.3928
FIS1	4	0.37677	0.55263	0.999238	9804	2	-0.39783	0.032949	0.099841	0.970387	1813	2	-0.39783
INPP5K	4	0.51394	0.66707	0.999238	11886	1	4.3133	0.032996	0.099973	0.970387	1814	3	4.3133
ADH1A	4	0.17166	0.33856	0.996369	5994	3	-1.5559	0.033004	0.099997	0.970387	1815	1	-1.5559
VMO1	4	0.075157	0.1831	0.995321	3250	2	1.3996	0.033007	0.1	0.970387	1816	2	1.3996
ZNF764	4	0.47257	0.63217	0.999238	11215	2	2.8495	0.033018	0.10003	0.970387	1817	2	2.8495
HELLS	4	0.35902	0.53813	0.999238	9555	2	1.1876	0.03306	0.10014	0.970387	1818	2	1.1876
OR2F2	4	0.94268	0.94288	0.999998	17011	0	5.317	0.033065	0.10015	0.970387	1819	3	5.317
YBX2	4	0.93993	0.94012	0.999998	16958	0	2.5856	0.033116	0.1003	0.970387	1820	3	2.5856
ELSPBP1	4	0.86176	0.86969	0.999238	15661	1	5.1573	0.033171	0.10046	0.970387	1821	3	5.1573
TLR8	4	0.68115	0.7773	0.999238	13861	1	2.4912	0.033178	0.10048	0.970387	1822	3	2.4912
PTGS1	4	0.42568	0.59308	0.999238	10504	1	4.2948	0.033255	0.10069	0.970387	1824	3	4.2948
KDM1A	4	0.55379	0.70095	0.999238	12468	2	-2.8622	0.033255	0.10069	0.970387	1823	1	-2.8622
ESCO1	4	0.96674	0.96688	0.999998	17435	0	2.6522	0.033257	0.1007	0.970387	1825	4	2.6522
FAM160A2	3	0.95876	0.95901	0.999998	17273	0	4.6059	0.041244	0.10074	0.970387	2214	3	4.6059
NPR2	4	0.96672	0.96685	0.999998	17434	0	5.0319	0.033275	0.10076	0.970387	1826	4	5.0319
DUSP23	4	0.96668	0.96681	0.999998	17432	0	4.1477	0.033324	0.10089	0.970387	1828	4	4.1477
KIAA1524	4	0.31595	0.5032	0.999238	8882	2	2.8215	0.033338	0.10093	0.970387	1829	2	2.8215
CAV2	4	0.54064	0.68975	0.999238	12273	1	4.9532	0.033338	0.10093	0.970387	1830	3	4.9532
DENND1B	4	0.96402	0.96416	0.999998	17389	0	5.0726	0.033349	0.10096	0.970387	1831	4	5.0726
INTS2	4	0.90732	0.90757	0.999238	16360	1	5.3071	0.033363	0.10101	0.970387	1832	3	5.3071
PTGDR2	4	0.45259	0.6153	0.999238	10930	1	5.1717	0.033418	0.10115	0.970387	1833	3	5.1717
ZKSCAN1	4	0.93569	0.93587	0.999238	16888	0	5.7894	0.033444	0.10123	0.970387	1834	3	5.7894
HCN4	4	0.96655	0.96669	0.999998	17430	0	3.9378	0.033449	0.10124	0.970387	1835	4	3.9378
DHRS1	4	0.11432	0.2486	0.996369	4412	3	-1.709	0.033477	0.10132	0.970387	1836	1	-1.709
SRY	3	0.85566	0.8556	0.999238	15578	0	6.1946	0.041501	0.10134	0.970387	2226	2	6.1946
C8orf37	4	0.92608	0.92637	0.999238	16706	0	5.2367	0.033506	0.1014	0.970387	1837	3	5.2367
HINT3	4	0.76238	0.81199	0.999238	14543	1	3.1561	0.033561	0.10153	0.970387	1838	3	3.1561
UBE2L6	4	0.26164	0.45912	0.999238	8136	1	5.627	0.033581	0.10158	0.970387	1840	3	5.627
OR4K14	4	0.93258	0.93278	0.999238	16832	0	5.6348	0.033587	0.1016	0.970387	1841	3	5.6348
PPA2	4	0.35966	0.53867	0.999238	9567	2	2.5918	0.033613	0.10167	0.970387	1843	2	2.5918
ISPD	4	0.95667	0.95681	0.999998	17246	0	5.6449	0.033612	0.10167	0.970387	1842	4	5.6449
NR5A1	4	0.59942	0.74001	0.999238	13168	1	3.2339	0.033616	0.10168	0.970387	1844	3	3.2339
C4B	1	0.8983	0.89886	0.999238	16212	0	4.5333	0.1017	0.10169	0.970387	4138	1	4.5333
IGFL3	4	0.15878	0.31895	0.996369	5647	1	5.4018	0.033625	0.1017	0.970387	1845	3	5.4018
ANGPTL7	4	0.13277	0.27817	0.996369	4924	3	-1.5542	0.033672	0.10181	0.970387	1846	1	-1.5542
DZIP1L	4	0.14242	0.29343	0.996369	5199	1	4.9196	0.033687	0.10185	0.970387	1847	3	4.9196
SLC34A2	4	0.96631	0.96645	0.999998	17428	0	5.116	0.033691	0.10187	0.970387	1848	4	5.116
AGMAT	4	0.092847	0.21342	0.996369	3795	1	-0.5568	0.033783	0.10211	0.970387	1849	2	-0.5568
CCDC135	4	0.12305	0.26267	0.996369	4651	1	5.537	0.033787	0.10213	0.970387	1850	3	5.537
KLHL36	4	0.54563	0.69404	0.999238	12342	2	3.0173	0.033866	0.10233	0.970387	1851	2	3.0173
B4GALNT1	4	0.96612	0.96628	0.999998	17426	0	5.7199	0.033875	0.10235	0.970387	1852	4	5.7199
GUCY2D	3	0.95802	0.95827	0.999998	17264	0	5.8973	0.041979	0.10238	0.970387	2248	3	5.8973
GALNT14	4	0.83186	0.84981	0.999238	15280	1	2.6565	0.033895	0.10241	0.970387	1853	2	2.6565
TMEM186	4	0.37451	0.55082	0.999238	9768	1	2.1	0.03395	0.10258	0.970387	1854	3	2.1
FERD3L	4	0.69953	0.78448	0.999238	14019	1	5.2302	0.033975	0.10264	0.970387	1855	3	5.2302
MAEL	4	0.21292	0.39941	0.996948	7098	2	2.4048	0.033981	0.10265	0.970387	1856	2	2.4048
MAP3K7CL	4	0.17266	0.34007	0.996369	6022	3	-1.5672	0.034006	0.10273	0.970387	1857	1	-1.5672
CALR	4	0.076042	0.18469	0.995321	3282	2	2.0551	0.034015	0.10275	0.970387	1858	2	2.0551
TMEM39B	4	0.77286	0.81709	0.999238	14642	1	5.7613	0.03402	0.10276	0.970387	1859	3	5.7613
PSMD4	4	0.72475	0.79494	0.999238	14221	1	5.9807	0.034038	0.10282	0.970387	1860	3	5.9807
SLC25A21	4	0.9029	0.90336	0.999238	16284	1	-0.44145	0.034061	0.10287	0.970387	1861	2	-0.44145
PLCZ1	4	0.32913	0.51386	0.999238	9095	1	5.4228	0.034089	0.10295	0.970387	1862	3	5.4228
LGALSL	4	0.53733	0.68691	0.999238	12218	2	3.1069	0.034108	0.10301	0.970387	1863	2	3.1069
RAPH1	4	0.96589	0.96602	0.999998	17423	0	4.637	0.034112	0.10302	0.970387	1864	4	4.637
FAM49A	4	0.49131	0.64794	0.999238	11488	1	1.3163	0.034117	0.10303	0.970387	1865	2	1.3163
ANGPTL4	4	0.90138	0.90193	0.999238	16267	1	5.0037	0.034119	0.10303	0.970387	1866	3	5.0037
ZNF418	4	0.96584	0.96597	0.999998	17422	0	4.9725	0.034155	0.10314	0.970387	1867	4	4.9725
ITGA2B	4	0.89211	0.89357	0.999238	16108	1	2.5446	0.034173	0.10319	0.970387	1868	3	2.5446
TP53I13	4	0.4368	0.60218	0.999238	10670	1	3.5695	0.034177	0.1032	0.970387	1869	2	3.5695
ZFC3H1	4	0.29532	0.48637	0.999238	8590	2	0.16904	0.034228	0.10333	0.970387	1870	2	0.16904
APEX2	4	0.71568	0.79107	0.999238	14147	1	5.7025	0.034253	0.1034	0.970387	1872	3	5.7025
FBXO8	4	0.94358	0.94379	0.999998	17027	0	5.2128	0.034284	0.10348	0.970387	1873	3	5.2128
PASD1	4	0.69655	0.78325	0.999238	13993	1	5.2685	0.03431	0.10355	0.970387	1874	3	5.2685
CEP350	4	0.88692	0.88918	0.999238	16026	1	3.5004	0.03431	0.10355	0.970387	1875	2	3.5004
PSD3	4	0.92768	0.928	0.999238	16740	0	4.0647	0.03434	0.10365	0.970387	1876	3	4.0647
DDAH1	4	0.86561	0.87254	0.999238	15700	1	5.3612	0.034351	0.10367	0.970387	1877	3	5.3612
VPS9D1	4	0.80626	0.83469	0.999238	14989	1	5.8448	0.03436	0.10369	0.970387	1878	3	5.8448
ITSN1	4	0.89082	0.89247	0.999238	16085	1	3.3276	0.034374	0.10373	0.970387	1879	2	3.3276
RIC8B	4	0.81952	0.8423	0.999238	15132	1	5.4862	0.034379	0.10374	0.970387	1880	3	5.4862
ADCK3	4	0.96561	0.96573	0.999998	17420	0	4.3067	0.034387	0.10377	0.970387	1881	4	4.3067
GLYATL2	4	0.95164	0.95181	0.999998	17163	0	5.0839	0.034395	0.10379	0.970387	1882	4	5.0839
POLDIP3	4	0.38552	0.5598	0.999238	9942	2	1.5867	0.034451	0.10394	0.970387	1883	2	1.5867
PTGER3	4	0.86463	0.87179	0.999238	15691	1	4.7102	0.034455	0.10395	0.970387	1884	3	4.7102
FOXM1	4	0.96549	0.96561	0.999998	17419	0	5.8144	0.034511	0.1041	0.970387	1885	4	5.8144
PPP2R5A	4	0.96547	0.96559	0.999998	17418	0	4.862	0.034533	0.10415	0.970387	1886	4	4.862
NOX1	4	0.072921	0.17927	0.995321	3183	1	5.2647	0.034544	0.10418	0.970387	1887	3	5.2647
ACAT1	4	0.96273	0.96282	0.999998	17354	0	5.5935	0.034548	0.10419	0.970387	1888	4	5.5935
C7orf13	4	0.89822	0.89896	0.999238	16211	1	5.2523	0.03455	0.1042	0.970387	1889	3	5.2523
MS4A3	4	0.7218	0.79367	0.999238	14196	1	5.3783	0.034582	0.10428	0.970387	1891	3	5.3783
TUBGCP6	4	0.96531	0.96542	0.999998	17414	0	5.3258	0.034594	0.10431	0.970387	1892	4	5.3258
PPM1L	4	0.35184	0.53235	0.999238	9437	2	1.9517	0.034618	0.10437	0.970387	1894	2	1.9517
POLN	4	0.96538	0.96551	0.999998	17416	0	3.78	0.034616	0.10437	0.970387	1893	4	3.78
TMSB10	3	0.9571	0.9574	0.999998	17256	0	6.169	0.042895	0.10442	0.970387	2290	3	6.169
SYT7	4	0.63614	0.76083	0.999238	13541	1	5.6793	0.034641	0.10443	0.970387	1895	3	5.6793
CISD3	4	0.89383	0.89507	0.999238	16132	1	2.0507	0.034673	0.10451	0.970387	1897	2	2.0507
LRRC8C	4	0.9653	0.96541	0.999998	17413	0	4.7994	0.034696	0.10458	0.970387	1898	4	4.7994
OR2K2	4	0.57566	0.71959	0.999238	12802	2	3.129	0.034699	0.10459	0.970387	1899	2	3.129
ADPGK	4	0.96529	0.9654	0.999998	17412	0	3.4837	0.034707	0.10461	0.970387	1900	4	3.4837
CSGALNACT2	4	0.33431	0.51798	0.999238	9170	2	2.6418	0.034729	0.10467	0.970387	1901	2	2.6418
ENTPD4	3	0.95697	0.95726	0.999998	17250	0	4.0604	0.043027	0.1047	0.970387	2299	3	4.0604
CHI3L1	4	0.46419	0.62509	0.999238	11097	1	5.5431	0.034748	0.10472	0.970387	1902	3	5.5431
CCR5	4	0.03635	0.109	0.966908	1966	2	1.9914	0.034757	0.10475	0.970387	1903	2	1.9914
TTC39A	4	0.96523	0.96534	0.999998	17411	0	4.4931	0.034772	0.10479	0.970387	1904	4	4.4931
ALDH8A1	4	0.89496	0.89609	0.999238	16149	1	3.6873	0.034792	0.10484	0.970387	1905	2	3.6873
UXS1	3	0.5013	0.61632	0.999238	11665	1	4.9901	0.043097	0.10485	0.970387	2303	2	4.9901
SLC35A1	4	0.012046	0.039774	0.911792	744	1	4.9721	0.034839	0.10497	0.970387	1906	3	4.9721
WSB1	4	0.1746	0.34297	0.996369	6072	3	-1.1762	0.03484	0.10497	0.970387	1907	1	-1.1762
NKX2-2	4	0.52152	0.67357	0.999238	11986	1	5.9872	0.034897	0.10513	0.970387	1908	3	5.9872
KLHL1	4	0.16061	0.32174	0.996369	5690	1	5.6902	0.034933	0.10524	0.970387	1910	3	5.6902
ACOT2	4	0.96504	0.96516	0.999998	17409	0	3.1658	0.034956	0.1053	0.970387	1911	4	3.1658
EIF3K	4	0.68033	0.77698	0.999238	13853	1	4.6844	0.034958	0.10531	0.970387	1912	3	4.6844
VCP	4	0.83659	0.85275	0.999238	15334	1	5.7975	0.034967	0.10533	0.970387	1913	3	5.7975
OASL	4	0.79094	0.82639	0.999238	14811	1	5.7599	0.034978	0.10536	0.970387	1914	3	5.7599
ZFP2	4	0.96502	0.96514	0.999998	17408	0	3.5673	0.034979	0.10536	0.970387	1915	4	3.5673
NOA1	4	0.14061	0.29062	0.996369	5137	2	3.0424	0.035002	0.10542	0.970387	1916	2	3.0424
ACTBL2	4	0.965	0.96511	0.999998	17407	0	4.3711	0.035004	0.10543	0.970387	1917	4	4.3711
ACAD8	4	0.86095	0.86909	0.999238	15652	1	5.6798	0.035022	0.10548	0.970387	1918	3	5.6798
USP21	3	0.92869	0.92882	0.999238	16757	0	6.2575	0.043382	0.10549	0.970387	2315	3	6.2575
UHRF2	4	0.96497	0.96509	0.999998	17406	0	3.402	0.035035	0.10551	0.970387	1919	4	3.402
TRIM41	4	0.18327	0.35588	0.996369	6320	1	5.8645	0.035037	0.10552	0.970387	1921	3	5.8645
RXRB	4	0.88995	0.89172	0.999238	16066	1	5.4736	0.035048	0.10555	0.970387	1922	3	5.4736
DCXR	4	0.96491	0.96504	0.999998	17405	0	3.2344	0.035085	0.10566	0.970387	1923	4	3.2344
FAM120AOS	4	0.9649	0.96502	0.999998	17404	0	5.0789	0.035099	0.10569	0.970387	1924	4	5.0789
KRT40	4	0.96487	0.96499	0.999998	17403	0	4.686	0.035127	0.10577	0.970387	1925	4	4.686
BRD4	4	0.96483	0.96495	0.999998	17402	0	3.7956	0.035173	0.10591	0.970387	1926	4	3.7956
SIRPB1	4	0.96481	0.96493	0.999998	17401	0	5.0417	0.035187	0.10595	0.970387	1927	4	5.0417
GJB2	4	0.9163	0.9165	0.999238	16539	0	5.1355	0.035202	0.10599	0.970387	1928	3	5.1355
KLHDC8A	4	0.96478	0.96489	0.999998	17400	0	4.0971	0.035224	0.10606	0.970387	1929	4	4.0971
INO80	4	0.036904	0.11049	0.966908	2000	3	-4.2755	0.035229	0.10607	0.970387	1930	1	-4.2755
WDTC1	4	0.96477	0.96489	0.999998	17399	0	3.6226	0.035229	0.10607	0.970387	1931	4	3.6226
AIM1L	4	0.79674	0.82951	0.999238	14883	1	0.89329	0.035284	0.10622	0.970387	1932	3	0.89329
MYBL2	4	0.47702	0.6359	0.999238	11282	1	2.2495	0.03534	0.10636	0.970387	1933	3	2.2495
MORN2	3	0.95622	0.9565	0.999998	17241	0	5.5018	0.043783	0.10639	0.970387	2328	3	5.5018
PGLYRP2	4	0.60419	0.74418	0.999238	13247	1	5.9224	0.035414	0.10656	0.970387	1935	3	5.9224
E2F2	4	0.96456	0.96468	0.999998	17396	0	4.0083	0.035441	0.10662	0.970387	1936	4	4.0083
ATG7	4	0.28323	0.47655	0.999238	8444	1	3.6922	0.035447	0.10665	0.970387	1937	3	3.6922
PRCC	4	0.49554	0.65156	0.999238	11570	1	5.3588	0.03546	0.10668	0.970387	1938	3	5.3588
C3orf18	4	0.71837	0.79221	0.999238	14170	1	4.6671	0.035471	0.10671	0.970387	1939	3	4.6671
AIF1L	4	0.7798	0.82057	0.999238	14710	1	5.8529	0.035485	0.10675	0.970387	1940	3	5.8529
EHF	4	0.84553	0.85843	0.999238	15448	1	5.2928	0.035507	0.10679	0.970387	1941	3	5.2928
OR12D3	4	0.92814	0.92846	0.999238	16749	0	5.9963	0.035537	0.10687	0.970387	1942	3	5.9963
KCNA1	4	0.96444	0.96456	0.999998	17395	0	3.1988	0.035564	0.10694	0.970387	1943	4	3.1988
CLIP1	4	0.96437	0.9645	0.999998	17394	0	3.3011	0.03563	0.1071	0.970387	1944	4	3.3011
SLC43A3	4	0.89734	0.89818	0.999238	16192	1	4.9758	0.035653	0.10716	0.970387	1945	3	4.9758
ERBB2IP	4	0.9643	0.96444	0.999998	17393	0	4.5311	0.0357	0.10729	0.970387	1946	4	4.5311
FAM120B	4	0.95937	0.95952	0.999998	17288	0	5.5554	0.035705	0.10731	0.970387	1947	4	5.5554
ARHGAP28	4	0.96427	0.96441	0.999998	17392	0	3.9924	0.035728	0.10736	0.970387	1948	4	3.9924
TEX37	4	0.51426	0.66734	0.999238	11892	1	6.001	0.035777	0.10749	0.970387	1949	3	6.001
SIX5	4	0.35752	0.53691	0.999238	9523	1	5.6749	0.035783	0.1075	0.970387	1950	3	5.6749
RNF181	4	0.72036	0.79307	0.999238	14184	1	4.7974	0.035784	0.10751	0.970387	1951	3	4.7974
ZPBP2	4	0.022273	0.070148	0.932381	1320	1	5.9185	0.035816	0.10759	0.970387	1952	3	5.9185
PRSS1	3	0.83431	0.83421	0.999238	15307	1	5.2127	0.044343	0.10764	0.970387	2349	2	5.2127
PCDH8	4	0.96414	0.96427	0.999998	17391	0	4.5902	0.035855	0.1077	0.970387	1953	4	4.5902
TTK	4	0.15161	0.3077	0.996369	5443	1	5.199	0.035881	0.10777	0.970387	1954	3	5.199
ZNF221	4	0.6487	0.76528	0.999238	13610	1	5.2584	0.035887	0.10779	0.970387	1955	3	5.2584
FGF3	4	0.49138	0.64799	0.999238	11494	2	2.8855	0.035895	0.1078	0.970387	1956	2	2.8855
C17orf97	4	0.26869	0.46475	0.999238	8232	1	3.6542	0.035896	0.10781	0.970387	1957	3	3.6542
NRBF2	1	0.89191	0.89241	0.999238	16103	0	6.5763	0.10809	0.10799	0.970387	4326	1	6.5763
SLC52A2	4	0.96402	0.96416	0.999998	17387	0	4.335	0.035978	0.10802	0.970387	1958	4	4.335
C19orf70	4	0.96402	0.96416	0.999998	17388	0	4.5363	0.035978	0.10802	0.970387	1959	4	4.5363
DAB1	4	0.061435	0.15899	0.995321	2834	1	5.8953	0.035985	0.10805	0.970387	1960	3	5.8953
[truncated: 16,052 more rows]
