# Supplementary material for: A HIF independent oxygen-sensitive pathway for controlling cholesterol synthesis
Source: Nat Commun. 2023 Aug 9;14:4816. doi: 10.1038/s41467-023-40541-1 (PMC10412576; doi:10.1038/s41467-023-40541-1)
Supplement: Supplementary file 4 — Supplementary Data 3 [file 41467_2023_40541_MOESM4_ESM.xlsx]

## Sheet: Results
Data S3: LC-MS analysis of cholesterol
Sample ID	Cholesterol_M+14	Cholesterol_M+15	Cholesterol_M+16	Cholesterol_M+11	Cholesterol_M+12	Cholesterol_M+13	Cholesterol_M+9	Cholesterol	Cholesterol_M+10	Cholesterol_M+8
Ctrl1_1	59631.7	21403.9	50263.7	265187	43881.6	NF	95236.4	1.42526e+08	46216.7	44125.6
Ctrl1_2	75020.1	174879	158588	178457	182564	139326	77844.2	1.61863e+08	41697.2	41457
Statin_1	0	0	0	0	0	0	0	5.24897e+07	0	0
Statin_2	0	0	0	40317.6	0	0	0	5.60099e+07	0	0
Sterol_dep1_1	3.34246e+06	3.25248e+06	3.06408e+06	3.33158e+06	3.32934e+06	3.44841e+06	2.57632e+06	4.0201e+07	2.99538e+06	2.17408e+06
Sterol_dep1_2	1.76778e+06	1.41493e+06	1.18611e+06	1.98957e+06	1.89867e+06	1.52955e+06	1.43782e+06	2.47369e+07	1.52836e+06	941262
HypoM1_1	0	0	0	34059.2	0	0	0	3.35733e+07	0	0
HypoM1_2	29132.5	0	0	92242.8	0	0	0	1.04641e+08	0	23033.9
HypoMSD1_2	659456	610066	481217	1.12759e+06	838630	851191	1.21029e+06	4.78726e+07	918466	1.12567e+06
HypoMSD1_1	841420	639932	453574	1.07511e+06	947643	711571	1.05229e+06	4.13876e+07	991109	1.07925e+06

## Sheet: Cholesterol_M+14
Component Name		Curve Index	Weighting Index	Origin Index	Equation
Cholesterol_M+14		Average RF	Equal	Ignore	Average Response Factor = 678585 %RSD = 161.8
							Specified	Calculated
Filename	Sample Type	Sample Name	Integ. Type	Area	ISTD Area	Area Ratio	Amount	Amount	%Diff	%RSD-AMT	Peak Status	Level	Units	RT	Sample ID
JN_intact_lipids_181022_01	Unknown Sample		Method Settings	3942.57	NA	NA	NA	NA	NA	NA		NA		5.80442	Blank
JN_intact_lipids_181022_02	Unknown Sample		Method Settings	NF	NA	NF	NA	NF	NF	NF	Not Found	NA		NF	Blank
JN_intact_lipids_181022_03	Unknown Sample		Method Settings	29132.5	NA	NA	NA	NA	NA	NA		NA		5.6096	HypoM1_2
JN_intact_lipids_181022_04	Unknown Sample		Method Settings	59631.7	NA	NA	NA	NA	NA	NA		NA		5.62339	Ctrl1_1
JN_intact_lipids_181022_05	Unknown Sample		Method Settings	75020.1	NA	NA	NA	NA	NA	NA		NA		5.64355	Ctrl1_2
JN_intact_lipids_181022_06	Unknown Sample		Method Settings	NF	NA	NF	NA	NF	NF	NF	Not Found	NA		NF	Statin1_1
JN_intact_lipids_181022_07	Unknown Sample		Method Settings	NF	NA	NF	NA	NF	NF	NF	Not Found	NA		NF	Statin1_2
JN_intact_lipids_181022_08	Unknown Sample		Method Settings	3.34246e+06	NA	NA	NA	NA	NA	NA		NA		5.61979	Sterol_dep1_1
JN_intact_lipids_181022_09	Unknown Sample		Method Settings	1.76778e+06	NA	NA	NA	NA	NA	NA		NA		5.61599	Sterol_dep1_2
JN_intact_lipids_181022_10	Unknown Sample		Method Settings	NF	NA	NF	NA	NF	NF	NF	Not Found	NA		NF	HypoM1_1
JN_intact_lipids_181022_11	Unknown Sample		Method Settings	659456	NA	NA	NA	NA	NA	NA		NA		5.64822	HypoMSD1_2
JN_intact_lipids_181022_12	Unknown Sample		Method Settings	841420	NA	NA	NA	NA	NA	NA		NA		5.61483	HypoMSD1_1
JN_intact_lipids_181022_13	Unknown Sample		Method Settings	2279.69	NA	NA	NA	NA	NA	NA		NA		5.73874	Blank
JN_intact_lipids_181022_14	Unknown Sample		Method Settings	4720.15	NA	NA	NA	NA	NA	NA		NA		5.71772	Blank
Created By:
User Name		Full Name		Date
jaw68		James West		21/10/2022 16:30:54

## Sheet: Cholesterol_M+15
Component Name		Curve Index	Weighting Index	Origin Index	Equation
Cholesterol_M+15		Average RF	Equal	Ignore	Average Response Factor = 1.01895e+006 %RSD = 117.5
							Specified	Calculated
Filename	Sample Type	Sample Name	Integ. Type	Area	ISTD Area	Area Ratio	Amount	Amount	%Diff	%RSD-AMT	Peak Status	Level	Units	RT	Sample ID
JN_intact_lipids_181022_01	Unknown Sample		Method Settings	NF	NA	NF	NA	NF	NF	NF	Not Found	NA		NF	Blank
JN_intact_lipids_181022_02	Unknown Sample		Method Settings	NF	NA	NF	NA	NF	NF	NF	Not Found	NA		NF	Blank
JN_intact_lipids_181022_03	Unknown Sample		Method Settings	NF	NA	NF	NA	NF	NF	NF	Not Found	NA		NF	HypoM1_2
JN_intact_lipids_181022_04	Unknown Sample		Method Settings	21403.9	NA	NA	NA	NA	NA	NA		NA		5.47182	Ctrl1_1
JN_intact_lipids_181022_05	Unknown Sample		Method Settings	174879	NA	NA	NA	NA	NA	NA		NA		5.62843	Ctrl1_2
JN_intact_lipids_181022_06	Unknown Sample		Method Settings	NF	NA	NF	NA	NF	NF	NF	Not Found	NA		NF	Statin1_1
JN_intact_lipids_181022_07	Unknown Sample		Method Settings	NF	NA	NF	NA	NF	NF	NF	Not Found	NA		NF	Statin1_2
JN_intact_lipids_181022_08	Unknown Sample		Method Settings	3.25248e+06	NA	NA	NA	NA	NA	NA		NA		5.62484	Sterol_dep1_1
JN_intact_lipids_181022_09	Unknown Sample		Method Settings	1.41493e+06	NA	NA	NA	NA	NA	NA		NA		5.61599	Sterol_dep1_2
JN_intact_lipids_181022_10	Unknown Sample		Method Settings	NF	NA	NF	NA	NF	NF	NF	Not Found	NA		NF	HypoM1_1
JN_intact_lipids_181022_11	Unknown Sample		Method Settings	610066	NA	NA	NA	NA	NA	NA		NA		5.63303	HypoMSD1_2
JN_intact_lipids_181022_12	Unknown Sample		Method Settings	639932	NA	NA	NA	NA	NA	NA		NA		5.61483	HypoMSD1_1
JN_intact_lipids_181022_13	Unknown Sample		Method Settings	NF	NA	NF	NA	NF	NF	NF	Not Found	NA		NF	Blank
JN_intact_lipids_181022_14	Unknown Sample		Method Settings	NF	NA	NF	NA	NF	NF	NF	Not Found	NA		NF	Blank
Created By:
User Name		Full Name		Date
jaw68		James West		21/10/2022 16:30:54

## Sheet: Cholesterol_M+16
Component Name		Curve Index	Weighting Index	Origin Index	Equation
Cholesterol_M+16		Average RF	Equal	Ignore	Average Response Factor = 898974 %RSD = 126.0
							Specified	Calculated
Filename	Sample Type	Sample Name	Integ. Type	Area	ISTD Area	Area Ratio	Amount	Amount	%Diff	%RSD-AMT	Peak Status	Level	Units	RT	Sample ID
JN_intact_lipids_181022_01	Unknown Sample		Method Settings	NF	NA	NF	NA	NF	NF	NF	Not Found	NA		NF	Blank
JN_intact_lipids_181022_02	Unknown Sample		Method Settings	NF	NA	NF	NA	NF	NF	NF	Not Found	NA		NF	Blank
JN_intact_lipids_181022_03	Unknown Sample		Method Settings	NF	NA	NF	NA	NF	NF	NF	Not Found	NA		NF	HypoM1_2
JN_intact_lipids_181022_04	Unknown Sample		Method Settings	50263.7	NA	NA	NA	NA	NA	NA		NA		5.61834	Ctrl1_1
JN_intact_lipids_181022_05	Unknown Sample		Method Settings	158588	NA	NA	NA	NA	NA	NA		NA		5.64355	Ctrl1_2
JN_intact_lipids_181022_06	Unknown Sample		Method Settings	NF	NA	NF	NA	NF	NF	NF	Not Found	NA		NF	Statin1_1
JN_intact_lipids_181022_07	Unknown Sample		Method Settings	NF	NA	NF	NA	NF	NF	NF	Not Found	NA		NF	Statin1_2
JN_intact_lipids_181022_08	Unknown Sample		Method Settings	3.06408e+06	NA	NA	NA	NA	NA	NA		NA		5.62484	Sterol_dep1_1
JN_intact_lipids_181022_09	Unknown Sample		Method Settings	1.18611e+06	NA	NA	NA	NA	NA	NA		NA		5.62104	Sterol_dep1_2
JN_intact_lipids_181022_10	Unknown Sample		Method Settings	NF	NA	NF	NA	NF	NF	NF	Not Found	NA		NF	HypoM1_1
JN_intact_lipids_181022_11	Unknown Sample		Method Settings	481217	NA	NA	NA	NA	NA	NA		NA		5.6077	HypoMSD1_2
JN_intact_lipids_181022_12	Unknown Sample		Method Settings	453574	NA	NA	NA	NA	NA	NA		NA		5.62495	HypoMSD1_1
JN_intact_lipids_181022_13	Unknown Sample		Method Settings	NF	NA	NF	NA	NF	NF	NF	Not Found	NA		NF	Blank
JN_intact_lipids_181022_14	Unknown Sample		Method Settings	NF	NA	NF	NA	NF	NF	NF	Not Found	NA		NF	Blank
Created By:
User Name		Full Name		Date
jaw68		James West		21/10/2022 16:30:54

## Sheet: Cholesterol_M+11
Component Name		Curve Index	Weighting Index	Origin Index	Equation
Cholesterol_M+11		Average RF	Equal	Ignore	Average Response Factor = 739980 %RSD = 145.4
							Specified	Calculated
Filename	Sample Type	Sample Name	Integ. Type	Area	ISTD Area	Area Ratio	Amount	Amount	%Diff	%RSD-AMT	Peak Status	Level	Units	RT	Sample ID
JN_intact_lipids_181022_01	Unknown Sample		Method Settings	3423.32	NA	NA	NA	NA	NA	NA		NA		5.42661	Blank
JN_intact_lipids_181022_02	Unknown Sample		Method Settings	2234.41	NA	NA	NA	NA	NA	NA		NA		5.7837	Blank
JN_intact_lipids_181022_03	Unknown Sample		Method Settings	92242.8	NA	NA	NA	NA	NA	NA		NA		5.61969	HypoM1_2
JN_intact_lipids_181022_04	Unknown Sample		Method Settings	265187	NA	NA	NA	NA	NA	NA		NA		5.63346	Ctrl1_1
JN_intact_lipids_181022_05	Unknown Sample		Method Settings	178457	NA	NA	NA	NA	NA	NA		NA		5.63851	Ctrl1_2
JN_intact_lipids_181022_06	Unknown Sample		Method Settings	NF	NA	NF	NA	NF	NF	NF	Not Found	NA		NF	Statin1_1
JN_intact_lipids_181022_07	Unknown Sample		Method Settings	40317.6	NA	NA	NA	NA	NA	NA		NA		5.60882	Statin1_2
JN_intact_lipids_181022_08	Unknown Sample		Method Settings	3.33158e+06	NA	NA	NA	NA	NA	NA		NA		5.62988	Sterol_dep1_1
JN_intact_lipids_181022_09	Unknown Sample		Method Settings	1.98957e+06	NA	NA	NA	NA	NA	NA		NA		5.62104	Sterol_dep1_2
JN_intact_lipids_181022_10	Unknown Sample		Method Settings	34059.2	NA	NA	NA	NA	NA	NA		NA		5.65386	HypoM1_1
JN_intact_lipids_181022_11	Unknown Sample		Method Settings	1.12759e+06	NA	NA	NA	NA	NA	NA		NA		5.63808	HypoMSD1_2
JN_intact_lipids_181022_12	Unknown Sample		Method Settings	1.07511e+06	NA	NA	NA	NA	NA	NA		NA		5.60978	HypoMSD1_1
JN_intact_lipids_181022_13	Unknown Sample		Method Settings	NF	NA	NF	NA	NF	NF	NF	Not Found	NA		NF	Blank
JN_intact_lipids_181022_14	Unknown Sample		Method Settings	NF	NA	NF	NA	NF	NF	NF	Not Found	NA		NF	Blank
Created By:
User Name		Full Name		Date
jaw68		James West		21/10/2022 16:30:54

## Sheet: Cholesterol_M+12
Component Name		Curve Index	Weighting Index	Origin Index	Equation
Cholesterol_M+12		Average RF	Equal	Ignore	Average Response Factor = 1.20679e+006 %RSD = 102.1
							Specified	Calculated
Filename	Sample Type	Sample Name	Integ. Type	Area	ISTD Area	Area Ratio	Amount	Amount	%Diff	%RSD-AMT	Peak Status	Level	Units	RT	Sample ID
JN_intact_lipids_181022_01	Unknown Sample		Method Settings	NF	NA	NF	NA	NF	NF	NF	Not Found	NA		NF	Blank
JN_intact_lipids_181022_02	Unknown Sample		Method Settings	NF	NA	NF	NA	NF	NF	NF	Not Found	NA		NF	Blank
JN_intact_lipids_181022_03	Unknown Sample		Method Settings	NF	NA	NF	NA	NF	NF	NF	Not Found	NA		NF	HypoM1_2
JN_intact_lipids_181022_04	Unknown Sample		Method Settings	43881.6	NA	NA	NA	NA	NA	NA		NA		5.65362	Ctrl1_1
JN_intact_lipids_181022_05	Unknown Sample		Method Settings	182564	NA	NA	NA	NA	NA	NA		NA		5.65363	Ctrl1_2
JN_intact_lipids_181022_06	Unknown Sample		Method Settings	NF	NA	NF	NA	NF	NF	NF	Not Found	NA		NF	Statin1_1
JN_intact_lipids_181022_07	Unknown Sample		Method Settings	NF	NA	NF	NA	NF	NF	NF	Not Found	NA		NF	Statin1_2
JN_intact_lipids_181022_08	Unknown Sample		Method Settings	3.32934e+06	NA	NA	NA	NA	NA	NA		NA		5.62988	Sterol_dep1_1
JN_intact_lipids_181022_09	Unknown Sample		Method Settings	1.89867e+06	NA	NA	NA	NA	NA	NA		NA		5.61599	Sterol_dep1_2
JN_intact_lipids_181022_10	Unknown Sample		Method Settings	NF	NA	NF	NA	NF	NF	NF	Not Found	NA		NF	HypoM1_1
JN_intact_lipids_181022_11	Unknown Sample		Method Settings	838630	NA	NA	NA	NA	NA	NA		NA		5.63808	HypoMSD1_2
JN_intact_lipids_181022_12	Unknown Sample		Method Settings	947643	NA	NA	NA	NA	NA	NA		NA		5.63002	HypoMSD1_1
JN_intact_lipids_181022_13	Unknown Sample		Method Settings	NF	NA	NF	NA	NF	NF	NF	Not Found	NA		NF	Blank
JN_intact_lipids_181022_14	Unknown Sample		Method Settings	NF	NA	NF	NA	NF	NF	NF	Not Found	NA		NF	Blank
Created By:
User Name		Full Name		Date
jaw68		James West		21/10/2022 16:30:54

## Sheet: Cholesterol_M+13
Component Name		Curve Index	Weighting Index	Origin Index	Equation
Cholesterol_M+13		Average RF	Equal	Ignore	Average Response Factor = 1.33601e+006 %RSD = 95.8
							Specified	Calculated
Filename	Sample Type	Sample Name	Integ. Type	Area	ISTD Area	Area Ratio	Amount	Amount	%Diff	%RSD-AMT	Peak Status	Level	Units	RT	Sample ID
JN_intact_lipids_181022_01	Unknown Sample		Method Settings	NF	NA	NF	NA	NF	NF	NF	Not Found	NA		NF	Blank
JN_intact_lipids_181022_02	Unknown Sample		Method Settings	NF	NA	NF	NA	NF	NF	NF	Not Found	NA		NF	Blank
JN_intact_lipids_181022_03	Unknown Sample		Method Settings	NF	NA	NF	NA	NF	NF	NF	Not Found	NA		NF	HypoM1_2
JN_intact_lipids_181022_04	Unknown Sample		Method Settings	NF	NA	NF	NA	NF	NF	NF	Not Found	NA		NF	Ctrl1_1
JN_intact_lipids_181022_05	Unknown Sample		Method Settings	139326	NA	NA	NA	NA	NA	NA		NA		5.63851	Ctrl1_2
JN_intact_lipids_181022_06	Unknown Sample		Method Settings	NF	NA	NF	NA	NF	NF	NF	Not Found	NA		NF	Statin1_1
JN_intact_lipids_181022_07	Unknown Sample		Method Settings	NF	NA	NF	NA	NF	NF	NF	Not Found	NA		NF	Statin1_2
JN_intact_lipids_181022_08	Unknown Sample		Method Settings	3.44841e+06	NA	NA	NA	NA	NA	NA		NA		5.62484	Sterol_dep1_1
JN_intact_lipids_181022_09	Unknown Sample		Method Settings	1.52955e+06	NA	NA	NA	NA	NA	NA		NA		5.62104	Sterol_dep1_2
JN_intact_lipids_181022_10	Unknown Sample		Method Settings	NF	NA	NF	NA	NF	NF	NF	Not Found	NA		NF	HypoM1_1
JN_intact_lipids_181022_11	Unknown Sample		Method Settings	851191	NA	NA	NA	NA	NA	NA		NA		5.63303	HypoMSD1_2
JN_intact_lipids_181022_12	Unknown Sample		Method Settings	711571	NA	NA	NA	NA	NA	NA		NA		5.62495	HypoMSD1_1
JN_intact_lipids_181022_13	Unknown Sample		Method Settings	NF	NA	NF	NA	NF	NF	NF	Not Found	NA		NF	Blank
JN_intact_lipids_181022_14	Unknown Sample		Method Settings	NF	NA	NF	NA	NF	NF	NF	Not Found	NA		NF	Blank
Created By:
User Name		Full Name		Date
jaw68		James West		21/10/2022 16:30:54

## Sheet: Cholesterol_M+9
Component Name		Curve Index	Weighting Index	Origin Index	Equation
Cholesterol_M+9		Average RF	Equal	Ignore	Average Response Factor = 1.07497e+006 %RSD = 86.9
							Specified	Calculated
Filename	Sample Type	Sample Name	Integ. Type	Area	ISTD Area	Area Ratio	Amount	Amount	%Diff	%RSD-AMT	Peak Status	Level	Units	RT	Sample ID
JN_intact_lipids_181022_01	Unknown Sample		Method Settings	NF	NA	NF	NA	NF	NF	NF	Not Found	NA		NF	Blank
JN_intact_lipids_181022_02	Unknown Sample		Method Settings	NF	NA	NF	NA	NF	NF	NF	Not Found	NA		NF	Blank
JN_intact_lipids_181022_03	Unknown Sample		Method Settings	NF	NA	NF	NA	NF	NF	NF	Not Found	NA		NF	HypoM1_2
JN_intact_lipids_181022_04	Unknown Sample		Method Settings	95236.4	NA	NA	NA	NA	NA	NA		NA		5.65362	Ctrl1_1
JN_intact_lipids_181022_05	Unknown Sample		Method Settings	77844.2	NA	NA	NA	NA	NA	NA		NA		5.65363	Ctrl1_2
JN_intact_lipids_181022_06	Unknown Sample		Method Settings	NF	NA	NF	NA	NF	NF	NF	Not Found	NA		NF	Statin1_1
JN_intact_lipids_181022_07	Unknown Sample		Method Settings	NF	NA	NF	NA	NF	NF	NF	Not Found	NA		NF	Statin1_2
JN_intact_lipids_181022_08	Unknown Sample		Method Settings	2.57632e+06	NA	NA	NA	NA	NA	NA		NA		5.62988	Sterol_dep1_1
JN_intact_lipids_181022_09	Unknown Sample		Method Settings	1.43782e+06	NA	NA	NA	NA	NA	NA		NA		5.63114	Sterol_dep1_2
JN_intact_lipids_181022_10	Unknown Sample		Method Settings	NF	NA	NF	NA	NF	NF	NF	Not Found	NA		NF	HypoM1_1
JN_intact_lipids_181022_11	Unknown Sample		Method Settings	1.21029e+06	NA	NA	NA	NA	NA	NA		NA		5.63303	HypoMSD1_2
JN_intact_lipids_181022_12	Unknown Sample		Method Settings	1.05229e+06	NA	NA	NA	NA	NA	NA		NA		5.61483	HypoMSD1_1
JN_intact_lipids_181022_13	Unknown Sample		Method Settings	NF	NA	NF	NA	NF	NF	NF	Not Found	NA		NF	Blank
JN_intact_lipids_181022_14	Unknown Sample		Method Settings	NF	NA	NF	NA	NF	NF	NF	Not Found	NA		NF	Blank
Created By:
User Name		Full Name		Date
jaw68		James West		21/10/2022 16:30:54

## Sheet: Cholesterol
Component Name		Curve Index	Weighting Index	Origin Index	Equation
Cholesterol		Average RF	Equal	Ignore	Average Response Factor = 7.05302e+007 %RSD = 68.4
							Specified	Calculated
Filename	Sample Type	Sample Name	Integ. Type	Area	ISTD Area	Area Ratio	Amount	Amount	%Diff	%RSD-AMT	Peak Status	Level	Units	RT	Sample ID
JN_intact_lipids_181022_01	Unknown Sample		Method Settings	NF	NA	NF	NA	NF	NF	NF	Not Found	NA		NF	Blank
JN_intact_lipids_181022_02	Unknown Sample		Method Settings	NF	NA	NF	NA	NF	NF	NF	Not Found	NA		NF	Blank
JN_intact_lipids_181022_03	Unknown Sample		Manual Integration	1.04641e+08	NA	NA	NA	NA	NA	NA		NA		5.63994	HypoM1_2
JN_intact_lipids_181022_04	Unknown Sample		Method Settings	1.42526e+08	NA	NA	NA	NA	NA	NA		NA		5.64858	Ctrl1_1
JN_intact_lipids_181022_05	Unknown Sample		Method Settings	1.61863e+08	NA	NA	NA	NA	NA	NA		NA		5.63851	Ctrl1_2
JN_intact_lipids_181022_06	Unknown Sample		Manual Integration	5.24897e+07	NA	NA	NA	NA	NA	NA		NA		5.62838	Statin1_1
JN_intact_lipids_181022_07	Unknown Sample		Manual Integration	5.60099e+07	NA	NA	NA	NA	NA	NA		NA		5.61891	Statin1_2
JN_intact_lipids_181022_08	Unknown Sample		Method Settings	4.0201e+07	NA	NA	NA	NA	NA	NA		NA		5.62988	Sterol_dep1_1
JN_intact_lipids_181022_09	Unknown Sample		Manual Integration	2.47369e+07	NA	NA	NA	NA	NA	NA		NA		5.62104	Sterol_dep1_2
JN_intact_lipids_181022_10	Unknown Sample		Manual Integration	3.35733e+07	NA	NA	NA	NA	NA	NA		NA		5.63365	HypoM1_1
JN_intact_lipids_181022_11	Unknown Sample		Manual Integration	4.78726e+07	NA	NA	NA	NA	NA	NA		NA		5.63303	HypoMSD1_2
JN_intact_lipids_181022_12	Unknown Sample		Manual Integration	4.13876e+07	NA	NA	NA	NA	NA	NA		NA		5.61483	HypoMSD1_1
JN_intact_lipids_181022_13	Unknown Sample		Method Settings	NF	NA	NF	NA	NF	NF	NF	Not Found	NA		NF	Blank
JN_intact_lipids_181022_14	Unknown Sample		Method Settings	NF	NA	NF	NA	NF	NF	NF	Not Found	NA		NF	Blank
Created By:
User Name		Full Name		Date
jaw68		James West		21/10/2022 16:30:54

## Sheet: Cholesterol_M+10
Component Name		Curve Index	Weighting Index	Origin Index	Equation
Cholesterol_M+10		Average RF	Equal	Ignore	Average Response Factor = 1.08687e+006 %RSD = 101.2
							Specified	Calculated
Filename	Sample Type	Sample Name	Integ. Type	Area	ISTD Area	Area Ratio	Amount	Amount	%Diff	%RSD-AMT	Peak Status	Level	Units	RT	Sample ID
JN_intact_lipids_181022_01	Unknown Sample		Method Settings	NF	NA	NF	NA	NF	NF	NF	Not Found	NA		NF	Blank
JN_intact_lipids_181022_02	Unknown Sample		Method Settings	NF	NA	NF	NA	NF	NF	NF	Not Found	NA		NF	Blank
JN_intact_lipids_181022_03	Unknown Sample		Method Settings	NF	NA	NF	NA	NF	NF	NF	Not Found	NA		NF	HypoM1_2
JN_intact_lipids_181022_04	Unknown Sample		Method Settings	46216.7	NA	NA	NA	NA	NA	NA		NA		5.63346	Ctrl1_1
JN_intact_lipids_181022_05	Unknown Sample		Method Settings	41697.2	NA	NA	NA	NA	NA	NA		NA		5.62339	Ctrl1_2
JN_intact_lipids_181022_06	Unknown Sample		Method Settings	NF	NA	NF	NA	NF	NF	NF	Not Found	NA		NF	Statin1_1
JN_intact_lipids_181022_07	Unknown Sample		Method Settings	NF	NA	NF	NA	NF	NF	NF	Not Found	NA		NF	Statin1_2
JN_intact_lipids_181022_08	Unknown Sample		Manual Integration	2.99538e+06	NA	NA	NA	NA	NA	NA		NA		5.62484	Sterol_dep1_1
JN_intact_lipids_181022_09	Unknown Sample		Method Settings	1.52836e+06	NA	NA	NA	NA	NA	NA		NA		5.63619	Sterol_dep1_2
JN_intact_lipids_181022_10	Unknown Sample		Method Settings	NF	NA	NF	NA	NF	NF	NF	Not Found	NA		NF	HypoM1_1
JN_intact_lipids_181022_11	Unknown Sample		Method Settings	918466	NA	NA	NA	NA	NA	NA		NA		5.6077	HypoMSD1_2
JN_intact_lipids_181022_12	Unknown Sample		Method Settings	991109	NA	NA	NA	NA	NA	NA		NA		5.63508	HypoMSD1_1
JN_intact_lipids_181022_13	Unknown Sample		Method Settings	NF	NA	NF	NA	NF	NF	NF	Not Found	NA		NF	Blank
JN_intact_lipids_181022_14	Unknown Sample		Method Settings	NF	NA	NF	NA	NF	NF	NF	Not Found	NA		NF	Blank
Created By:
User Name		Full Name		Date
jaw68		James West		21/10/2022 16:30:54

[truncated: 3 more sheets: Cholesterol_M+8, Component, mdlCalcs]
